# Supplementary material for: Metabolomic Risk Predictors of Diabetic Foot Complications: a longitudinal observational study in Type 1 Diabetes
Source: bioRxiv or medRxiv preprint supplement (doi:10.1101/2022.05.16.22275166), 2023-08-30
Supplement: Supplementary file [file media-1.pdf]

# PROFIL Foot Complications Metabolomics

Tommi Suvitaival, tommi.raimo.leo.suvitaival@regionh.dk, Steno Diabetes Center Copenhagen

January 20, 2023

## Contents

|          |                                             |           |
|----------|---------------------------------------------|-----------|
| <b>1</b> | <b>Settings</b>                             | <b>5</b>  |
| <b>2</b> | <b>Dates</b>                                | <b>7</b>  |
| <b>3</b> | <b>Event-Times</b>                          | <b>8</b>  |
| 3.1      | Counts and Ranges . . . . .                 | 8         |
| 3.2      | Histograms . . . . .                        | 10        |
| 3.2.1    | Time From Baseline . . . . .                | 10        |
| 3.2.2    | Events v. Baseline . . . . .                | 13        |
| <b>4</b> | <b>Charcot</b>                              | <b>16</b> |
| 4.1      | Charcot at DATE . . . . .                   | 16        |
| 4.1.1    | Crude Model . . . . .                       | 16        |
| 4.1.1.1  | Forest Plot of Model Coefficients . . . . . | 17        |
| 4.1.1.2  | Tables of Model Coefficients . . . . .      | 18        |
| 4.1.1.3  | Table with All Metabolites . . . . .        | 19        |
| 4.1.2    | Adjusted Model . . . . .                    | 21        |
| 4.1.2.1  | Forest Plot of Model Coefficients . . . . . | 22        |
| 4.1.2.2  | Tables of Model Coefficients . . . . .      | 23        |
| 4.1.2.3  | Table with All Metabolites . . . . .        | 28        |
| 4.1.3    | Adjusted Model with eGFR . . . . .          | 30        |
| 4.1.3.1  | Forest Plot of Model Coefficients . . . . . | 31        |
| 4.1.3.2  | Tables of Model Coefficients . . . . .      | 32        |
| 4.1.3.3  | Table with All Metabolites . . . . .        | 38        |
| 4.1.4    | Fully-Adjusted Model . . . . .              | 40        |
| 4.1.4.1  | Forest Plot of Model Coefficients . . . . . | 41        |
| 4.1.4.2  | Tables of Model Coefficients . . . . .      | 42        |
| 4.1.4.3  | Table with All Metabolites . . . . .        | 47        |

|           |                                                   |           |
|-----------|---------------------------------------------------|-----------|
| 4.1.5     | Compilation . . . . .                             | 49        |
| 4.2       | Charcot from DATE . . . . .                       | 50        |
| 4.2.1     | Crude Model . . . . .                             | 50        |
| 4.2.1.1   | Forest Plot of Model Coefficients . . . . .       | 51        |
| 4.2.1.2   | Table with All Metabolites . . . . .              | 52        |
| 4.2.1.3   | Top-Metabolite . . . . .                          | 54        |
| 4.2.1.4   | Kaplan-Maier Curve with Median Cutpoint . . . . . | 55        |
| 4.2.2     | Adusted Model . . . . .                           | 56        |
| 4.2.2.1   | Forest Plot of Model Coefficients . . . . .       | 57        |
| 4.2.2.2   | Table with All Metabolites . . . . .              | 58        |
| 4.2.2.3   | Top-Metabolite . . . . .                          | 60        |
| 4.2.2.3.1 | Forest Plot with Clinical Variables . . . . .     | 61        |
| 4.2.3     | Adusted Model with eGFR . . . . .                 | 62        |
| 4.2.3.1   | Forest Plot of Model Coefficients . . . . .       | 63        |
| 4.2.3.2   | Table with All Metabolites . . . . .              | 64        |
| 4.2.3.3   | Top-Metabolite from Adjusted Model . . . . .      | 66        |
| 4.2.3.3.1 | Forest Plot with Clinical Variables . . . . .     | 67        |
| 4.2.4     | Fully Adusted Model . . . . .                     | 68        |
| 4.2.4.1   | Forest Plot of Model Coefficients . . . . .       | 69        |
| 4.2.4.2   | Table with All Metabolites . . . . .              | 70        |
| 4.2.4.3   | Top-Metabolite from Adjusted Model . . . . .      | 72        |
| 4.2.4.3.1 | Forest Plot with Clinical Variables . . . . .     | 73        |
| <b>5</b>  | <b>Amputation</b>                                 | <b>74</b> |
| 5.1       | Amputation at DATE . . . . .                      | 74        |
| 5.1.1     | Crude Model . . . . .                             | 74        |
| 5.1.1.1   | Forest Plot of Model Coefficients . . . . .       | 75        |
| 5.1.1.2   | Tables of Model Coefficients . . . . .            | 76        |
| 5.1.1.3   | Table with All Metabolites . . . . .              | 77        |
| 5.1.2     | Adjusted Model . . . . .                          | 79        |
| 5.1.2.1   | Forest Plot of Model Coefficients . . . . .       | 80        |
| 5.1.2.2   | Tables of Model Coefficients . . . . .            | 81        |
| 5.1.2.3   | Table with All Metabolites . . . . .              | 91        |
| 5.1.3     | Adjusted Model with eGFR . . . . .                | 93        |
| 5.1.3.1   | Forest Plot of Model Coefficients . . . . .       | 94        |
| 5.1.3.2   | Tables of Model Coefficients . . . . .            | 95        |
| 5.1.3.3   | Table with All Metabolites . . . . .              | 105       |

|           |                                                        |            |
|-----------|--------------------------------------------------------|------------|
| 5.1.4     | Fully-Adjusted Model . . . . .                         | 107        |
| 5.1.4.1   | Forest Plot of Model Coefficients . . . . .            | 108        |
| 5.1.4.2   | Tables of Model Coefficients . . . . .                 | 109        |
| 5.1.4.3   | Table with All Metabolites . . . . .                   | 119        |
| 5.2       | Amputation from DATE . . . . .                         | 121        |
| 5.2.1     | Crude Model . . . . .                                  | 121        |
| 5.2.1.1   | Forest Plot of Model Coefficients . . . . .            | 122        |
| 5.2.1.2   | Table with All Metabolites . . . . .                   | 123        |
| 5.2.1.3   | Top-Metabolite from Cross-Sectional Analysis . . . . . | 125        |
| 5.2.1.4   | Kaplan-Maier Curve with Median Cutpoint . . . . .      | 126        |
| 5.2.2     | Adusted Model . . . . .                                | 127        |
| 5.2.2.1   | Forest Plot of Model Coefficients . . . . .            | 128        |
| 5.2.2.2   | Table with All Metabolites . . . . .                   | 129        |
| 5.2.2.3   | Top-Metabolite from Cross-Sectional Analysis . . . . . | 131        |
| 5.2.2.3.1 | Forest Plot with Clinical Variables . . . . .          | 132        |
| 5.2.3     | Adusted Model with eGFR . . . . .                      | 133        |
| 5.2.3.1   | Forest Plot of Model Coefficients . . . . .            | 134        |
| 5.2.3.2   | Table with All Metabolites . . . . .                   | 135        |
| 5.2.3.3   | Top-Metabolite from Cross-Sectional Analysis . . . . . | 137        |
| 5.2.3.3.1 | Forest Plot with Clinical Variables . . . . .          | 138        |
| 5.2.4     | Fully Adusted Model . . . . .                          | 139        |
| 5.2.4.1   | Forest Plot of Model Coefficients . . . . .            | 140        |
| 5.2.4.2   | Table with All Metabolites . . . . .                   | 141        |
| 5.2.4.3   | Top-Metabolite from Cross-Sectional Analysis . . . . . | 143        |
| 5.2.4.3.1 | Forest Plot with Clinical Variables . . . . .          | 144        |
| <b>6</b>  | <b>Ulcers</b>                                          | <b>145</b> |
| 6.1       | Ulcer Diagnosis at DATE . . . . .                      | 145        |
| 6.1.1     | Crude Model . . . . .                                  | 145        |
| 6.1.1.1   | Forest Plot of Model Coefficients . . . . .            | 146        |
| 6.1.1.2   | Tables of Model Coefficients . . . . .                 | 147        |
| 6.1.1.3   | Table with All Metabolites . . . . .                   | 148        |
| 6.1.2     | Adjusted Model . . . . .                               | 150        |
| 6.1.2.1   | Forest Plot of Model Coefficients . . . . .            | 151        |
| 6.1.2.2   | Tables of Model Coefficients . . . . .                 | 152        |
| 6.1.2.3   | Table with All Metabolites . . . . .                   | 161        |
| 6.1.3     | Adjusted Model with eGFR . . . . .                     | 163        |

|           |                                                             |            |
|-----------|-------------------------------------------------------------|------------|
| 6.1.3.1   | Forest Plot of Model Coefficients . . . . .                 | 164        |
| 6.1.3.2   | Tables of Model Coefficients . . . . .                      | 165        |
| 6.1.3.3   | Table with All Metabolites . . . . .                        | 175        |
| 6.1.4     | Fully-Adjusted Model . . . . .                              | 177        |
| 6.1.4.1   | Forest Plot of Model Coefficients . . . . .                 | 178        |
| 6.1.4.2   | Tables of Model Coefficients . . . . .                      | 179        |
| 6.1.4.3   | Table with All Metabolites . . . . .                        | 189        |
| 6.2       | Ulcer Diagnosis from DATE . . . . .                         | 191        |
| 6.2.1     | Crude Model . . . . .                                       | 191        |
| 6.2.1.1   | Forest Plot of Model Coefficients . . . . .                 | 192        |
| 6.2.1.2   | Table with All Metabolites . . . . .                        | 193        |
| 6.2.1.3   | Top Metabolite . . . . .                                    | 195        |
| 6.2.1.4   | Kaplan-Maier Curve with Median Cutpoint . . . . .           | 196        |
| 6.2.2     | Adjusted Model . . . . .                                    | 198        |
| 6.2.2.1   | Forest Plot of Model Coefficients . . . . .                 | 199        |
| 6.2.2.2   | Table with All Metabolites . . . . .                        | 200        |
| 6.2.2.3   | Top Metabolite . . . . .                                    | 202        |
| 6.2.2.3.1 | Forest Plot with Clinical Variables . . . . .               | 203        |
| 6.2.3     | Adjusted Model with eGFR . . . . .                          | 204        |
| 6.2.3.1   | Forest Plot of Model Coefficients . . . . .                 | 205        |
| 6.2.3.2   | Table with All Metabolites . . . . .                        | 206        |
| 6.2.3.3   | Top Metabolite from Adjusted Model . . . . .                | 208        |
| 6.2.3.3.1 | Forest Plot with Clinical Variables . . . . .               | 209        |
| 6.2.4     | Fully Adjusted Model . . . . .                              | 210        |
| 6.2.4.1   | Forest Plot of Model Coefficients . . . . .                 | 211        |
| 6.2.4.2   | Table with All Metabolites . . . . .                        | 212        |
| 6.2.4.3   | Top Metabolites . . . . .                                   | 214        |
| 6.2.4.3.1 | Top Metabolite – Tyrosine . . . . .                         | 214        |
| 6.2.4.3.2 | Top Metabolite from Adjusted Model – Ribonic Acid . . . . . | 219        |
| 6.2.5     | Compilation . . . . .                                       | 221        |
| <b>7</b>  | <b>Integration of Results</b>                               | <b>222</b> |
| 7.1       | Crude Models . . . . .                                      | 222        |
| 7.1.1     | Cross-Sectional . . . . .                                   | 222        |
| 7.1.2     | Longitudinal . . . . .                                      | 223        |
| 7.2       | Adjusted Models . . . . .                                   | 224        |
| 7.2.1     | Cross-Sectional . . . . .                                   | 224        |
| 7.2.2     | Longitudinal . . . . .                                      | 225        |

# 1 Settings

```
## [1] TRUE
```

## 2 Dates

## 3 Event-Times

### 3.1 Counts and Ranges

```
table( data$"Charcot.at.DATE" )
```

```
##  
## NEJ JA  
## 611 26
```

```
table( data$"Charcot.from.DATE" )
```

```
##  
## NEJ JA  
## 598 13
```

```
table( data$"Ulcer.diagnosis.at.DATE" )
```

```
##  
## NEJ JA  
## 618 19
```

```
table( data$"Ulcer.diagnosis.from.DATE" )
```

```
##  
## NEJ JA  
## 510 108
```

```
table( data$"Amputation.at.DATE" )
```

```
##  
## NEJ JA  
## 614 23
```

```
table( data$"Amputation.from.DATE" )
```

```
##  
## NEJ JA  
## 586 28
```

```
range( data$"Charcot_dt", na.rm = TRUE )
```

```
## [1] "1995-11-07" "2018-06-08"
```

```
tapply(  
  X = as.numeric( data$"Charcot.tdiff" ),  
  INDEX = data$"Charcot.from.DATE",  
  FUN = summary  
)
```



```
## $NEJ
##   Min. 1st Qu.  Median    Mean 3rd Qu.  Max.
##   2537   2685   2837    2841   2982   3185
##
## $JA
##   Min. 1st Qu.  Median    Mean 3rd Qu.  Max.
##    509   1076   1995    1805   2563   2924
```

```
range( data$"Sår_diagnose_dt", na.rm = TRUE )
```

```
## [1] "2001-12-11" "2020-09-01"
```

```
tapply(
  X = as.numeric( data$"Ulcer.diagnosis.tdiff" ),
  INDEX = data$"Ulcer.diagnosis.from.DATE",
  FUN = summary
)
```

```
## $NEJ
##   Min. 1st Qu.  Median    Mean 3rd Qu.  Max.
##   3353   3492   3653    3658   3815   4001
##
## $JA
##   Min. 1st Qu.  Median    Mean 3rd Qu.  Max.
##    106   1230   1948    1904   2539   3857
```

```
range( data$"Amputation_dt", na.rm = TRUE )
```

```
## [1] "1998-01-01" "2020-02-04"
```

```
tapply(
  X = as.numeric( data$"Amputation.tdiff" ),
  INDEX = data$"Amputation.from.DATE",
  FUN = summary
)
```

```
## $NEJ
##   Min. 1st Qu.  Median    Mean 3rd Qu.  Max.
##   3143   3295   3442    3449   3591   3791
##
## $JA
##   Min. 1st Qu.  Median    Mean 3rd Qu.  Max.
##   259.0   956.5  2138.0  2074.1  2941.2  3468.0
```

## 3.2 Histograms

### 3.2.1 Time From Baseline

```
## Don't know how to automatically pick scale for object of type difftime. Defaulting to continuous.
```

```
## 'stat_bin()' using 'bins = 30'. Pick better value with 'binwidth'.
```

```
## Warning: Removed 17 rows containing non-finite values (stat_bin).
```



```
## Don't know how to automatically pick scale for object of type difftime. Defaulting to continuous.
```

```
## 'stat_bin()' using 'bins = 30'. Pick better value with 'binwidth'.
```

```
## Warning: Removed 23 rows containing non-finite values (stat_bin).
```



```
## Don't know how to automatically pick scale for object of type difftime. Defaulting to continuous.
## 'stat_bin()' using 'bins = 30'. Pick better value with 'binwidth'.
```

```
## Warning: Removed 19 rows containing non-finite values (stat_bin).
```

Ulcer.diagnosis.from.DATE

■ NEJ ■ JA



### 3.2.2 Events v. Baseline

```
## 'stat_bin()' using 'bins = 30'. Pick better value with 'binwidth'.
```

```
## Warning: Removed 598 rows containing non-finite values (stat_bin).
```



```
## 'stat_bin()' using 'bins = 30'. Pick better value with 'binwidth'.
```

```
## Warning: Removed 586 rows containing non-finite values (stat_bin).
```



```
## 'stat_bin()' using 'bins = 30'. Pick better value with 'binwidth'.
```

```
## Warning: Removed 510 rows containing non-finite values (stat_bin).
```

Sår\_diagnose JA Ulcer.Diagnosis.Before.Baseline FALSE TRUE



## 4 Charcot

### 4.1 Charcot at DATE

#### 4.1.1 Crude Model

```
## [1] "Fitting models:"  
## [1] "~ Charcot.at.DATE"  
## [1] ""
```



#### 4.1.1.1 Forest Plot of Model Coefficients

## Warning: Ignoring unknown aesthetics: x



#### 4.1.1.2 Tables of Model Coefficients

```
## [1] ""
## [1] "Table: Charcot.at.DATEJA"
## [1] " (from model: "
## [1] " ~ Charcot.at.DATE)"
## [1] ""
##
##           Name Coefficient   CI.L   CI.R  p.value  p.adj
## 1 3,4-Dihydroxybutanoic acid; 27      0.739  0.347  1.130 0.000220 0.0142
## 2 2,4-Dihydroxybutanoic acid; 28      0.711  0.319  1.100 0.000379 0.0142
## 3           Leucine, 2TMS; 19     -0.675 -1.070 -0.284 0.000731 0.0142
## 4           Valine, 2TMS; 20     -0.674 -1.070 -0.282 0.000756 0.0142
## 5      Myo inositol 6TMS; 1       0.655  0.263  1.050 0.001050 0.0153
## 6           Ribitol; 71          0.647  0.255  1.040 0.001220 0.0153
## 7      Threonine, 3TMS; 12     -0.609 -1.000 -0.217 0.002340 0.0239
## 8           Ribonic acid; 72       0.603  0.211  0.995 0.002580 0.0239
## 9           Proline, 2TMS; 21     -0.596 -0.988 -0.204 0.002860 0.0239
```

#### 4.1.1.3 Table with All Metabolites

```

## [1] ""
## [1] "Table: Charcot.at.DATEJA"
## [1] " (from model: "
## [1] " ~ Charcot.at.DATE)"
## [1] ""
##
##          Name Coefficient    CI.L    CI.R  p.value  p.adj
## 1 3,4-Dihydroxybutanoic acid; 27    0.73900  0.34700  1.1300  0.000220  0.0142
## 2 2,4-Dihydroxybutanoic acid; 28    0.71100  0.31900  1.1000  0.000379  0.0142
## 3          Leucine, 2TMS; 19   -0.67500 -1.07000 -0.2840  0.000731  0.0142
## 4          Valine, 2TMS; 20   -0.67400 -1.07000 -0.2820  0.000756  0.0142
## 5      Myo inositol 6TMS; 1    0.65500  0.26300  1.0500  0.001050  0.0153
## 6          Ribitol; 71      0.64700  0.25500  1.0400  0.001220  0.0153
## 7      Threonine, 3TMS; 12   -0.60900 -1.00000 -0.2170  0.002340  0.0239
## 8          Ribonic acid; 72    0.60300  0.21100  0.9950  0.002580  0.0239
## 9          Proline, 2TMS; 21  -0.59600 -0.98800 -0.2040  0.002860  0.0239
## 10     Fumaric acid, 2TMS; 9    0.53400  0.14200  0.9260  0.007540  0.0566
## 11     Glycine, 3TMS; 17      0.51600  0.12400  0.9080  0.009900  0.0675
## 12     Creatinine; 50         0.48900  0.09720  0.8810  0.014500  0.0776
## 13     Ribitol; 70           0.48900  0.09710  0.8810  0.014500  0.0776
## 14     Methionine, 2TMS; 16   -0.48900 -0.88100 -0.0970  0.014500  0.0776
## 15     Pyroglutamic acid; 69   0.47700  0.08520  0.8690  0.017000  0.0852
## 16     Isoleucine, 2TMS; 18   -0.43700 -0.82900 -0.0449  0.028900  0.1260
## 17     Serine, 3TMS; 14      -0.43500 -0.82700 -0.0430  0.029600  0.1260
## 18     Citric acid, 4TMS; 6    0.43300  0.04110  0.8250  0.030400  0.1260
## 19 4-Hydroxybenzeneacetic acid; 4  0.39500  0.00346  0.7870  0.048000  0.1840
## 20     Benzeneacetic acid; 47   0.39300  0.00141  0.7850  0.049200  0.1840
## 21     Glyceryl-glycoside; 59   0.38900 -0.00317  0.7810  0.051900  0.1850
## 22     Tartronic acid; 73      0.36600 -0.02550  0.7580  0.066900  0.2240
## 23     Arabinopyranose; 51     0.36400 -0.02770  0.7560  0.068600  0.2240
## 24     Malic acid, 3TMS; 11    0.33800 -0.05410  0.7300  0.091200  0.2850
## 25     Glyceric acid; 30       0.32200 -0.06980  0.7140  0.107000  0.3210
## 26     3-Indoleacetic acid; 40  0.30600 -0.08600  0.6980  0.126000  0.3610
## 27     Dodecanoic acid; 54     0.30300 -0.08910  0.6950  0.130000  0.3610
## 28     Aminomalonic acid; 45    0.29600 -0.09580  0.6880  0.139000  0.3710
## 29     Myristoleic acid; 65    0.28000 -0.11200  0.6720  0.162000  0.4190
## 30     Succinic acid, 2TMS; 7   0.26300 -0.12900  0.6550  0.188000  0.4570
## 31     4-Deoxytetronic acid; 33 -0.26300 -0.65500  0.1290  0.189000  0.4570
## 32     Arachidonic acid, TMS; 24  0.24500 -0.14700  0.6370  0.221000  0.5130
## 33     Eicosapentaenoic acid; 55  0.24200 -0.15000  0.6340  0.226000  0.5130
## 34     4-Deoxytetronic acid; 32  0.23600 -0.15600  0.6280  0.238000  0.5250
## 35     Stearic acid, TMS; 2     0.22800 -0.16400  0.6200  0.254000  0.5440
## 36     1,3-Propanediol; 34      0.22300 -0.16900  0.6150  0.265000  0.5530
## 37     1-Dodecanol; 36         0.21300 -0.17900  0.6050  0.286000  0.5800
## 38     Bisphenol A; 48         0.20600 -0.18600  0.5980  0.303000  0.5990
## 39     Decanoic acid; 52       0.18000 -0.21200  0.5720  0.368000  0.6870
## 40     alpha-Tocopherol; 26     0.18000 -0.21200  0.5720  0.368000  0.6870
## 41     Cholesterol, TMS; 23     0.17200 -0.22000  0.5640  0.390000  0.6870
## 42     3-Indolepropionic acid; 41 -0.17100 -0.56300  0.2210  0.393000  0.6870
## 43     Oleic acid, TMS; 3      0.16900 -0.22200  0.5610  0.397000  0.6870
## 44     Tyrosine; 75           -0.16700 -0.55900  0.2250  0.403000  0.6870
## 45     11-Eicosenoic acid; 35   0.14700 -0.24500  0.5390  0.464000  0.7580
## 46     Phenylalanine, 2TMS; 13 -0.14500 -0.53700  0.2470  0.470000  0.7580

```

|       |                                |          |          |        |          |        |
|-------|--------------------------------|----------|----------|--------|----------|--------|
| ## 47 | Glycerol; 57                   | 0.14300  | -0.24900 | 0.5350 | 0.476000 | 0.7580 |
| ## 48 | 3-Hydroxybutyric acid, 2TMS; 1 | -0.14000 | -0.53200 | 0.2520 | 0.485000 | 0.7580 |
| ## 49 | 4-Hydroxyphenyllactic acid; 44 | 0.13600  | -0.25600 | 0.5270 | 0.498000 | 0.7620 |
| ## 50 | Tridecanoic acid; 74           | 0.11900  | -0.27300 | 0.5110 | 0.551000 | 0.8090 |
| ## 51 | Campesterol; 49                | 0.11800  | -0.27400 | 0.5100 | 0.555000 | 0.8090 |
| ## 52 | Palmitic acid, TMS; 5          | 0.11600  | -0.27600 | 0.5080 | 0.561000 | 0.8090 |
| ## 53 | Ethanolamine; 56               | -0.09800 | -0.49000 | 0.2940 | 0.624000 | 0.8500 |
| ## 54 | 2-Palmitoylglycerol; 39        | -0.09710 | -0.48900 | 0.2950 | 0.627000 | 0.8500 |
| ## 55 | Pyruvic acid; 31               | 0.09330  | -0.29900 | 0.4850 | 0.641000 | 0.8500 |
| ## 56 | Docosahexaenoic acid; 53       | 0.09120  | -0.30100 | 0.4830 | 0.648000 | 0.8500 |
| ## 57 | Hydroxylamine; 62              | -0.09050 | -0.48200 | 0.3010 | 0.651000 | 0.8500 |
| ## 58 | Nonanoic acid; 67              | 0.08860  | -0.30300 | 0.4810 | 0.658000 | 0.8500 |
| ## 59 | 2-Hydroxybutyric acid, 2TMS; 2 | -0.08530 | -0.47700 | 0.3070 | 0.670000 | 0.8510 |
| ## 60 | Linoleic acid, TMS; 4          | -0.07820 | -0.47000 | 0.3140 | 0.696000 | 0.8700 |
| ## 61 | Octanoic acid; 68              | -0.06480 | -0.45700 | 0.3270 | 0.746000 | 0.8720 |
| ## 62 | Heptadecanoic acid; 60         | 0.06170  | -0.33000 | 0.4540 | 0.758000 | 0.8720 |
| ## 63 | Lactic acid; 29                | 0.06130  | -0.33100 | 0.4530 | 0.759000 | 0.8720 |
| ## 64 | Glutamic acid, 3TMS; 8         | -0.06050 | -0.45200 | 0.3310 | 0.762000 | 0.8720 |
| ## 65 | 4-Hydroxybutanoic acid; 43     | -0.05620 | -0.44800 | 0.3360 | 0.779000 | 0.8720 |
| ## 66 | Glycerol; 58                   | 0.05610  | -0.33600 | 0.4480 | 0.779000 | 0.8720 |
| ## 67 | alpha-ketoglutaric acid, TMS M | 0.05280  | -0.33900 | 0.4450 | 0.792000 | 0.8720 |
| ## 68 | Hydroxyproline; 64             | 0.04770  | -0.34400 | 0.4400 | 0.811000 | 0.8720 |
| ## 69 | 2-hydroxy Isovaleric acid; 38  | 0.04720  | -0.34500 | 0.4390 | 0.813000 | 0.8720 |
| ## 70 | Nonadecanoic acid; 66          | 0.04710  | -0.34500 | 0.4390 | 0.814000 | 0.8720 |
| ## 71 | Heptadecanoic acid; 61         | 0.03480  | -0.35700 | 0.4270 | 0.862000 | 0.9110 |
| ## 72 | L-5-Oxoproline; 63             | 0.01620  | -0.37600 | 0.4080 | 0.936000 | 0.9750 |
| ## 73 | Alanine, 2TMS; 25              | -0.00625 | -0.39800 | 0.3860 | 0.975000 | 0.9810 |
| ## 74 | Arachidic acid; 46             | -0.00534 | -0.39700 | 0.3870 | 0.979000 | 0.9810 |
| ## 75 | 1-Monopalmitin; 37             | 0.00470  | -0.38700 | 0.3970 | 0.981000 | 0.9810 |

### 4.1.2 Adjusted Model

```
## [1] "Fitting models:"  
## [1] "~ Charcot.at.DATE + Age.x + Gender.x + Hba1c_baseline + CALSBP + bmi + Smoking + Statin + log_B  
## [1] ""
```

### 4.1.2.1 Forest Plot of Model Coefficients

```
## Warning: Ignoring unknown aesthetics: x
## Ignoring unknown aesthetics: x
```



#### 4.1.2.2 Tables of Model Coefficients

```
## [1] ""
## [1] "Table: Charcot.at.DATEJA"
## [1] " (from model: "
## [1] " ~ Charcot.at.DATE + Age.x + Gender.x + Hba1c_baseline"
## [1] " + CALSBP + bmi + Smoking + Statin + log_Blood_TGA +"
## [1] " Total_cholesterol)"
## [1] ""
##
## Name Coefficient CI.L CI.R p.value p.adj
## 1 3,4-Dihydroxybutanoic acid; 27 0.684 0.292 1.080 0.000625 0.0232
## 2 Proline, 2TMS; 21 -0.645 -1.040 -0.253 0.001270 0.0232
## 3 2,4-Dihydroxybutanoic acid; 28 0.639 0.247 1.030 0.001400 0.0232
## 4 Threonine, 3TMS; 12 -0.638 -1.030 -0.246 0.001430 0.0232
## 5 Leucine, 2TMS; 19 -0.633 -1.030 -0.241 0.001550 0.0232
## 6 Valine, 2TMS; 20 -0.615 -1.010 -0.223 0.002110 0.0264
## 7 Ribitol; 71 0.571 0.179 0.963 0.004300 0.0460
## 8 Ribonic acid; 72 0.556 0.164 0.948 0.005480 0.0481
## 9 Myo inositol 6TMS; 1 0.548 0.156 0.940 0.006130 0.0481
## 10 Fumaric acid, 2TMS; 9 0.545 0.153 0.937 0.006420 0.0481
## [1] ""
## [1] "Table: Age.x"
## [1] " (from model: "
## [1] " ~ Charcot.at.DATE + Age.x + Gender.x + Hba1c_baseline"
## [1] " + CALSBP + bmi + Smoking + Statin + log_Blood_TGA +"
## [1] " Total_cholesterol)"
## [1] ""
##
## Name Coefficient CI.L CI.R p.value p.adj
## 1 Eicosapentaenoic acid; 55 0.02180 0.01520 0.0285 1.60e-10 1.20e-08
## 2 4-Hydroxybenzeneacetic acid; 4 0.01650 0.00982 0.0232 1.33e-06 4.72e-05
## 3 2,4-Dihydroxybutanoic acid; 28 0.01630 0.00958 0.0230 1.89e-06 4.72e-05
## 4 Myo inositol 6TMS; 1 0.01440 0.00772 0.0211 2.44e-05 4.58e-04
## 5 Ribitol; 71 0.01380 0.00708 0.0205 5.55e-05 8.33e-04
## 6 Docosahexaenoic acid; 53 0.01330 0.00660 0.0200 9.99e-05 1.25e-03
## 7 3-Indoleacetic acid; 40 0.01300 0.00631 0.0197 1.41e-04 1.51e-03
## 8 Ribonic acid; 72 0.01140 0.00470 0.0181 8.54e-04 8.01e-03
## 9 Aminomalonic acid; 45 0.01090 0.00425 0.0176 1.35e-03 1.13e-02
## 10 alpha-ketoglutaric acid, TMS M 0.01070 0.00404 0.0174 1.67e-03 1.25e-02
## 11 Malic acid, 3TMS; 11 0.01020 0.00354 0.0169 2.73e-03 1.86e-02
## 12 Pyruvic acid; 31 0.01000 0.00335 0.0167 3.27e-03 1.94e-02
## 13 Ribitol; 70 0.00997 0.00328 0.0167 3.51e-03 1.94e-02
## 14 4-Hydroxyphenyllactic acid; 44 0.00994 0.00324 0.0166 3.63e-03 1.94e-02
## 15 Decanoic acid; 52 0.00983 0.00313 0.0165 4.02e-03 2.01e-02
## 16 Citric acid, 4TMS; 6 0.00963 0.00294 0.0163 4.80e-03 2.25e-02
## 17 3,4-Dihydroxybutanoic acid; 27 0.00951 0.00281 0.0162 5.38e-03 2.38e-02
## 18 alpha-Tocopherol; 26 0.00942 0.00273 0.0161 5.82e-03 2.39e-02
## 19 Fumaric acid, 2TMS; 9 0.00938 0.00268 0.0161 6.06e-03 2.39e-02
## 20 Succinic acid, 2TMS; 7 0.00925 0.00256 0.0159 6.74e-03 2.53e-02
## 21 Glyceric acid; 30 0.00917 0.00248 0.0159 7.24e-03 2.59e-02
## 22 Glycine, 3TMS; 17 0.00880 0.00210 0.0155 1.00e-02 3.29e-02
## 23 Alanine, 2TMS; 25 0.00879 0.00209 0.0155 1.01e-02 3.29e-02
## 24 11-Eicosenoic acid; 35 0.00855 0.00185 0.0152 1.23e-02 3.85e-02
## 25 Pyroglutamic acid; 69 0.00826 0.00157 0.0150 1.56e-02 4.67e-02
## [1] ""
```

```

## [1] "Table: Gender.x"
## [1] " (from model: "
## [1] " ~ Charcot.at.DATE + Age.x + Gender.x + Hba1c_baseline"
## [1] " + CALSBP + bmi + Smoking + Statin + log_Blood_TGA +"
## [1] " Total_cholesterol)"
## [1] ""
##
## Name Coefficient CI.L CI.R p.value p.adj
## 1 Citric acid, 4TMS; 6 -0.390 -0.548 -0.2330 1.21e-06 9.08e-05
## 2 Methionine, 2TMS; 16 0.369 0.212 0.5270 4.31e-06 1.62e-04
## 3 Valine, 2TMS; 20 0.358 0.201 0.5160 8.34e-06 2.05e-04
## 4 Myristoleic acid; 65 -0.353 -0.511 -0.1960 1.09e-05 2.05e-04
## 5 Proline, 2TMS; 21 0.349 0.192 0.5070 1.40e-05 2.09e-04
## 6 Glycine, 3TMS; 17 -0.339 -0.496 -0.1810 2.47e-05 2.96e-04
## 7 Leucine, 2TMS; 19 0.336 0.178 0.4930 2.93e-05 2.96e-04
## 8 Tartronic acid; 73 -0.334 -0.492 -0.1770 3.23e-05 2.96e-04
## 9 Isoleucine, 2TMS; 18 0.332 0.175 0.4900 3.55e-05 2.96e-04
## 10 Glyceric acid; 30 -0.326 -0.483 -0.1680 5.04e-05 3.78e-04
## 11 Dodecanoic acid; 54 -0.323 -0.480 -0.1650 5.92e-05 4.04e-04
## 12 4-Deoxytetronic acid; 33 0.305 0.148 0.4630 1.46e-04 9.14e-04
## 13 Oleic acid, TMS; 3 -0.296 -0.454 -0.1390 2.26e-04 1.30e-03
## 14 Aminomalonic acid; 45 -0.292 -0.449 -0.1340 2.82e-04 1.51e-03
## 15 2-hydroxy Isovaleric acid; 38 0.290 0.132 0.4470 3.15e-04 1.57e-03
## 16 Cholesterol, TMS; 23 -0.270 -0.428 -0.1130 7.63e-04 3.58e-03
## 17 Glutamic acid, 3TMS; 8 0.256 0.099 0.4140 1.41e-03 6.17e-03
## 18 Docosahexaenoic acid; 53 -0.255 -0.412 -0.0970 1.54e-03 6.17e-03
## 19 Tridecanoic acid; 74 -0.253 -0.411 -0.0959 1.62e-03 6.17e-03
## 20 Heptadecanoic acid; 60 -0.253 -0.410 -0.0955 1.65e-03 6.17e-03
## 21 Decanoic acid; 52 -0.247 -0.405 -0.0896 2.11e-03 7.53e-03
## 22 Heptadecanoic acid; 61 -0.245 -0.403 -0.0877 2.28e-03 7.77e-03
## 23 Myo inositol 6TMS; 1 -0.241 -0.399 -0.0837 2.69e-03 8.77e-03
## 24 Succinic acid, 2TMS; 7 -0.238 -0.396 -0.0808 3.02e-03 9.44e-03
## 25 Nonadecanoic acid; 66 -0.221 -0.378 -0.0631 6.04e-03 1.81e-02
## 26 Palmitic acid, TMS; 5 -0.205 -0.363 -0.0478 1.06e-02 3.06e-02
## 27 Stearic acid, TMS; 2 -0.196 -0.354 -0.0386 1.47e-02 4.08e-02
## 28 Benzeneacetic acid; 47 -0.190 -0.347 -0.0322 1.82e-02 4.88e-02
## [1] ""
## [1] "Table: Hba1c_baseline"
## [1] " (from model: "
## [1] " ~ Charcot.at.DATE + Age.x + Gender.x + Hba1c_baseline"
## [1] " + CALSBP + bmi + Smoking + Statin + log_Blood_TGA +"
## [1] " Total_cholesterol)"
## [1] ""
##
## Name Coefficient CI.L CI.R p.value p.adj
## 1 Tridecanoic acid; 74 -0.131 -0.2020 -0.0590 0.000348 0.0145
## 2 Eicosapentaenoic acid; 55 -0.127 -0.1990 -0.0560 0.000476 0.0145
## 3 Valine, 2TMS; 20 0.122 0.0503 0.1930 0.000844 0.0145
## 4 Glyceric acid; 30 -0.120 -0.1920 -0.0489 0.000967 0.0145
## 5 Ethanolamine; 56 0.119 0.0477 0.1910 0.001080 0.0145
## 6 Arabinopyranose; 51 0.119 0.0470 0.1900 0.001160 0.0145
## 7 Docosahexaenoic acid; 53 -0.116 -0.1870 -0.0440 0.001550 0.0166
## 8 Alanine, 2TMS; 25 0.110 0.0380 0.1810 0.002680 0.0251
## [1] ""
## [1] "Table: CALSBP"
## [1] " (from model: "

```



```

## [1] " ~ Charcot.at.DATE + Age.x + Gender.x + Hba1c_baseline"
## [1] " + CALSBP + bmi + Smoking + Statin + log_Blood_TGA +"
## [1] " Total_cholesterol)"
## [1] ""
## [1] "No significant associations at p.adj < 0.05"
## [1] ""
## [1] "Table: bmi"
## [1] " (from model: "
## [1] " ~ Charcot.at.DATE + Age.x + Gender.x + Hba1c_baseline"
## [1] " + CALSBP + bmi + Smoking + Statin + log_Blood_TGA +"
## [1] " Total_cholesterol)"
## [1] ""
##
## Name Coefficient CI.L CI.R p.value
## 1 Glutamic acid, 3TMS; 8 0.0458 0.02520 0.06630 1.31e-05
## 2 2-Hydroxybutyric acid, 2TMS; 2 0.0403 0.01970 0.06090 1.24e-04
## 3 Campesterol; 49 -0.0400 -0.06060 -0.01940 1.39e-04
## 4 Decanoic acid; 52 -0.0312 -0.05180 -0.01060 2.95e-03
## 5 Pyruvic acid; 31 -0.0310 -0.05160 -0.01040 3.17e-03
## 6 1,3-Propanediol; 34 -0.0305 -0.05110 -0.00992 3.68e-03
## 7 Arachidic acid; 46 -0.0300 -0.05050 -0.00939 4.32e-03
## 8 Lactic acid; 29 0.0294 0.00878 0.04990 5.17e-03
##
## p.adj
## 1 0.000983
## 2 0.003470
## 3 0.003470
## 4 0.046000
## 5 0.046000
## 6 0.046000
## 7 0.046300
## 8 0.048500
## [1] ""
## [1] "Table: Smoking"
## [1] " (from model: "
## [1] " ~ Charcot.at.DATE + Age.x + Gender.x + Hba1c_baseline"
## [1] " + CALSBP + bmi + Smoking + Statin + log_Blood_TGA +"
## [1] " Total_cholesterol)"
## [1] ""
##
## Name Coefficient CI.L CI.R p.value p.adj
## 1 Glutamic acid, 3TMS; 8 0.385 0.192 0.5770 9.13e-05 0.00538
## 2 Docosahexaenoic acid; 53 -0.362 -0.555 -0.1690 2.30e-04 0.00538
## 3 3-Indolepropionic acid; 41 -0.361 -0.554 -0.1680 2.40e-04 0.00538
## 4 Tartronic acid; 73 -0.356 -0.549 -0.1640 2.87e-04 0.00538
## 5 Glyceric acid; 30 -0.329 -0.522 -0.1370 8.08e-04 0.01210
## 6 Citric acid, 4TMS; 6 -0.313 -0.506 -0.1210 1.43e-03 0.01780
## 7 alpha-Tocopherol; 26 -0.296 -0.489 -0.1040 2.57e-03 0.02760
## 8 Benzeneacetic acid; 47 -0.286 -0.479 -0.0935 3.60e-03 0.03370
## 9 Ribonic acid; 72 -0.279 -0.472 -0.0868 4.47e-03 0.03720
## 10 Malic acid, 3TMS; 11 -0.271 -0.463 -0.0780 5.89e-03 0.04350
## 11 Campesterol; 49 -0.268 -0.461 -0.0754 6.38e-03 0.04350
## [1] ""
## [1] "Table: Statin"
## [1] " (from model: "
## [1] " ~ Charcot.at.DATE + Age.x + Gender.x + Hba1c_baseline"
## [1] " + CALSBP + bmi + Smoking + Statin + log_Blood_TGA +"

```

```

## [1] "      Total_cholesterol)"
## [1] ""
##           Name Coefficient   CI.L   CI.R   p.value   p.adj
## 1 L-5-Oxoproline; 63      -0.335 -0.508 -0.162 0.000143 0.0107
## [1] ""
## [1] "Table: log_Blood_TGA"
## [1] " (from model: "
## [1] "   ~ Charcot.at.DATE + Age.x + Gender.x + Hba1c_baseline"
## [1] "     + CALSBP + bmi + Smoking + Statin + log_Blood_TGA +"
## [1] "     Total_cholesterol)"
## [1] ""
##           Name Coefficient   CI.L   CI.R   p.value   p.adj
## 1      Dodecanoic acid; 54      0.287 0.1570 0.416 1.43e-05 0.000915
## 2      Palmitic acid, TMS; 5      0.279 0.1490 0.408 2.44e-05 0.000915
## 3      Stearic acid, TMS; 2      0.264 0.1340 0.393 6.59e-05 0.001370
## 4      Decanoic acid; 52      0.262 0.1330 0.392 7.29e-05 0.001370
## 5 3,4-Dihydroxybutanoic acid; 27 0.253 0.1230 0.382 1.29e-04 0.001690
## 6      Arachidic acid; 46      0.252 0.1230 0.382 1.35e-04 0.001690
## 7      Ribonic acid; 72      0.239 0.1090 0.368 3.01e-04 0.002920
## 8      Octanoic acid; 68      0.238 0.1090 0.368 3.11e-04 0.002920
## 9      Glyceryl-glycoside; 59 0.234 0.1050 0.364 3.91e-04 0.003260
## 10 4-Hydroxybenzeneacetic acid; 4 0.223 0.0934 0.352 7.41e-04 0.005560
## 11      Ribitol; 71      0.216 0.0864 0.345 1.08e-03 0.007020
## 12      Oleic acid, TMS; 3      0.215 0.0858 0.345 1.12e-03 0.007020
## 13      Arabinopyranose; 51 0.204 0.0745 0.333 2.02e-03 0.011700
## 14 2,4-Dihydroxybutanoic acid; 28 0.193 0.0637 0.323 3.46e-03 0.018500
## 15      Heptadecanoic acid; 60 0.187 0.0571 0.316 4.73e-03 0.023700
## 16      Fumaric acid, 2TMS; 9 0.183 0.0531 0.312 5.72e-03 0.026800
## 17 2-Hydroxybutyric acid, 2TMS; 2 0.179 0.0497 0.309 6.69e-03 0.029500
## 18      Myo inositol 6TMS; 1 0.174 0.0447 0.304 8.37e-03 0.034600
## 19      Lactic acid; 29      0.173 0.0437 0.303 8.77e-03 0.034600
## 20      Heptadecanoic acid; 61 0.170 0.0401 0.299 1.03e-02 0.038500
## 21      Myristoleic acid; 65 0.165 0.0360 0.295 1.23e-02 0.043800
## 22      Pyruvic acid; 31      0.164 0.0342 0.293 1.32e-02 0.045100
## 23      Malic acid, 3TMS; 11 0.162 0.0327 0.292 1.41e-02 0.045900
## 24      Glutamic acid, 3TMS; 8 0.160 0.0303 0.289 1.56e-02 0.048800
## [1] ""
## [1] "Table: Total_cholesterol"
## [1] " (from model: "
## [1] "   ~ Charcot.at.DATE + Age.x + Gender.x + Hba1c_baseline"
## [1] "     + CALSBP + bmi + Smoking + Statin + log_Blood_TGA +"
## [1] "     Total_cholesterol)"
## [1] ""
##           Name Coefficient   CI.L   CI.R   p.value   p.adj
## 1      Cholesterol, TMS; 23      0.464 0.3680 0.5600 3.57e-21 2.68e-19
## 2      Campesterol; 49      0.372 0.2750 0.4680 3.75e-14 1.41e-12
## 3      alpha-Tocopherol; 26 0.330 0.2340 0.4260 1.85e-11 4.63e-10
## 4      Benzeneacetic acid; 47 -0.190 -0.2860 -0.0938 1.09e-04 2.04e-03
## 5 4-Hydroxybutanoic acid; 43 -0.184 -0.2810 -0.0881 1.73e-04 2.44e-03
## 6      Proline, 2TMS; 21 -0.183 -0.2790 -0.0867 1.95e-04 2.44e-03
## 7      Linoleic acid, TMS; 4 0.181 0.0844 0.2770 2.33e-04 2.50e-03
## 8      L-5-Oxoproline; 63 -0.166 -0.2620 -0.0697 7.28e-04 6.61e-03
## 9      Glycine, 3TMS; 17 -0.165 -0.2610 -0.0685 7.93e-04 6.61e-03
## 10 2,4-Dihydroxybutanoic acid; 28 -0.162 -0.2580 -0.0659 9.63e-04 7.22e-03

```

|       |                                |        |         |         |          |          |
|-------|--------------------------------|--------|---------|---------|----------|----------|
| ## 11 | Isoleucine, 2TMS; 18           | -0.156 | -0.2520 | -0.0594 | 1.53e-03 | 1.04e-02 |
| ## 12 | 4-Hydroxybenzeneacetic acid; 4 | -0.154 | -0.2500 | -0.0577 | 1.72e-03 | 1.07e-02 |
| ## 13 | Eicosapentaenoic acid; 55      | 0.152  | 0.0560  | 0.2480  | 1.93e-03 | 1.12e-02 |
| ## 14 | Docosahexaenoic acid; 53       | 0.148  | 0.0513  | 0.2440  | 2.66e-03 | 1.42e-02 |
| ## 15 | Tyrosine; 75                   | -0.146 | -0.2420 | -0.0495 | 3.00e-03 | 1.50e-02 |
| ## 16 | Alanine, 2TMS; 25              | -0.144 | -0.2410 | -0.0481 | 3.28e-03 | 1.52e-02 |
| ## 17 | Threonine, 3TMS; 12            | -0.144 | -0.2400 | -0.0474 | 3.45e-03 | 1.52e-02 |
| ## 18 | Methionine, 2TMS; 16           | -0.142 | -0.2380 | -0.0460 | 3.76e-03 | 1.57e-02 |
| ## 19 | Glyceryl-glycoside; 59         | -0.141 | -0.2370 | -0.0444 | 4.17e-03 | 1.65e-02 |
| ## 20 | Arabinopyranose; 51            | -0.136 | -0.2330 | -0.0402 | 5.46e-03 | 2.00e-02 |
| ## 21 | 2-Palmitoylglycerol; 39        | 0.136  | 0.0398  | 0.2320  | 5.60e-03 | 2.00e-02 |
| ## 22 | Ribitol; 71                    | -0.135 | -0.2310 | -0.0384 | 6.10e-03 | 2.08e-02 |
| ## 23 | 3-Indoleacetic acid; 40        | -0.127 | -0.2230 | -0.0308 | 9.68e-03 | 3.16e-02 |
| ## 24 | Hydroxylamine; 62              | -0.126 | -0.2220 | -0.0296 | 1.04e-02 | 3.24e-02 |
| ## 25 | Serine, 3TMS; 14               | -0.121 | -0.2170 | -0.0250 | 1.36e-02 | 4.04e-02 |
| ## 26 | Ribonic acid; 72               | -0.121 | -0.2170 | -0.0244 | 1.40e-02 | 4.04e-02 |

#### 4.1.2.3 Table with All Metabolites

```

## [1] ""
## [1] "Table: Charcot.at.DATEJA"
## [1] " (from model: "
## [1] " ~ Charcot.at.DATE + Age.x + Gender.x + Hba1c_baseline"
## [1] " + CALSBP + bmi + Smoking + Statin + log_Blood_TGA +"
## [1] " Total_cholesterol)"
## [1] ""
##
## Name Coefficient CI.L CI.R p.value p.adj
## 1 3,4-Dihydroxybutanoic acid; 27 0.68400 0.29200 1.0800 0.000625 0.0232
## 2 Proline, 2TMS; 21 -0.64500 -1.04000 -0.2530 0.001270 0.0232
## 3 2,4-Dihydroxybutanoic acid; 28 0.63900 0.24700 1.0300 0.001400 0.0232
## 4 Threonine, 3TMS; 12 -0.63800 -1.03000 -0.2460 0.001430 0.0232
## 5 Leucine, 2TMS; 19 -0.63300 -1.03000 -0.2410 0.001550 0.0232
## 6 Valine, 2TMS; 20 -0.61500 -1.01000 -0.2230 0.002110 0.0264
## 7 Ribitol; 71 0.57100 0.17900 0.9630 0.004300 0.0460
## 8 Ribonic acid; 72 0.55600 0.16400 0.9480 0.005480 0.0481
## 9 Myo inositol 6TMS; 1 0.54800 0.15600 0.9400 0.006130 0.0481
## 10 Fumaric acid, 2TMS; 9 0.54500 0.15300 0.9370 0.006420 0.0481
## 11 Creatinine; 50 0.51000 0.11800 0.9030 0.010700 0.0686
## 12 Serine, 3TMS; 14 -0.50900 -0.90100 -0.1170 0.011000 0.0686
## 13 Methionine, 2TMS; 16 -0.47500 -0.86700 -0.0825 0.017700 0.0958
## 14 Ribitol; 70 0.47400 0.08170 0.8660 0.017900 0.0958
## 15 Pyroglutamic acid; 69 0.43300 0.04090 0.8250 0.030400 0.1520
## 16 Isoleucine, 2TMS; 18 -0.41400 -0.80600 -0.0216 0.038700 0.1810
## 17 Glyceryl-glycoside; 59 0.39700 0.00506 0.7890 0.047100 0.2080
## 18 Tartronic acid; 73 0.36200 -0.03030 0.7540 0.070500 0.2860
## 19 Arabinopyranose; 51 0.35900 -0.03270 0.7520 0.072400 0.2860
## 20 Glycine, 3TMS; 17 0.34500 -0.04660 0.7380 0.084200 0.3030
## 21 Citric acid, 4TMS; 6 0.34500 -0.04730 0.7370 0.084800 0.3030
## 22 Stearic acid, TMS; 2 0.33200 -0.06020 0.7240 0.097100 0.3310
## 23 Dodecanoic acid; 54 0.32600 -0.06570 0.7190 0.103000 0.3350
## 24 Cholesterol, TMS; 23 0.32200 -0.07060 0.7140 0.108000 0.3380
## 25 1,3-Propanediol; 34 0.31700 -0.07540 0.7090 0.113000 0.3400
## 26 Malic acid, 3TMS; 11 0.30500 -0.08710 0.6970 0.127000 0.3670
## 27 Glyceric acid; 30 0.29300 -0.09910 0.6850 0.143000 0.3720
## 28 alpha-Tocopherol; 26 0.29000 -0.10200 0.6820 0.147000 0.3720
## 29 Arachidonic acid, TMS; 24 0.28900 -0.10300 0.6810 0.148000 0.3720
## 30 Benzeneacetic acid; 47 0.28900 -0.10300 0.6810 0.149000 0.3720
## 31 1-Dodecanol; 36 0.28500 -0.10700 0.6780 0.154000 0.3720
## 32 4-Hydroxybenzeneacetic acid; 4 0.27600 -0.11600 0.6680 0.168000 0.3930
## 33 Myristoleic acid; 65 0.26500 -0.12700 0.6570 0.185000 0.4150
## 34 4-Deoxytetronic acid; 32 0.26000 -0.13200 0.6530 0.193000 0.4150
## 35 3-Indoleacetic acid; 40 0.25800 -0.13500 0.6500 0.198000 0.4150
## 36 Decanoic acid; 52 0.25500 -0.13700 0.6480 0.202000 0.4150
## 37 Tyrosine; 75 -0.25400 -0.64600 0.1380 0.205000 0.4150
## 38 Succinic acid, 2TMS; 7 0.24800 -0.14400 0.6400 0.215000 0.4240
## 39 Campesterol; 49 0.24100 -0.15200 0.6330 0.229000 0.4410
## 40 Phenylalanine, 2TMS; 13 -0.22100 -0.61300 0.1710 0.269000 0.5050
## 41 Bisphenol A; 48 0.20800 -0.18400 0.6000 0.299000 0.5460
## 42 Eicosapentaenoic acid; 55 0.19500 -0.19700 0.5870 0.330000 0.5900
## 43 Oleic acid, TMS; 3 0.19100 -0.20200 0.5830 0.341000 0.5940
## 44 4-Deoxytetronic acid; 33 -0.18100 -0.57400 0.2110 0.364000 0.6210

```

|       |                                |          |          |        |          |        |
|-------|--------------------------------|----------|----------|--------|----------|--------|
| ## 45 | Palmitic acid, TMS; 5          | 0.17500  | -0.21700 | 0.5670 | 0.383000 | 0.6250 |
| ## 46 | Aminomalonic acid; 45          | 0.17400  | -0.21800 | 0.5670 | 0.383000 | 0.6250 |
| ## 47 | Tridecanoic acid; 74           | 0.17000  | -0.22200 | 0.5620 | 0.396000 | 0.6320 |
| ## 48 | Hydroxylamine; 62              | -0.16300 | -0.55500 | 0.2290 | 0.416000 | 0.6380 |
| ## 49 | 2-hydroxy Isovaleric acid; 38  | 0.16200  | -0.23000 | 0.5550 | 0.417000 | 0.6380 |
| ## 50 | Ethanolamine; 56               | -0.14600 | -0.53900 | 0.2460 | 0.464000 | 0.6910 |
| ## 51 | Nonanoic acid; 67              | 0.14200  | -0.25000 | 0.5340 | 0.478000 | 0.6910 |
| ## 52 | 3-Indolepropionic acid; 41     | -0.14200 | -0.53400 | 0.2500 | 0.479000 | 0.6910 |
| ## 53 | 4-Hydroxyphenyllactic acid; 44 | 0.11900  | -0.27300 | 0.5110 | 0.552000 | 0.7680 |
| ## 54 | Pyruvic acid; 31               | 0.11900  | -0.27300 | 0.5110 | 0.553000 | 0.7680 |
| ## 55 | Alanine, 2TMS; 25              | -0.11600 | -0.50800 | 0.2760 | 0.563000 | 0.7680 |
| ## 56 | 3-Hydroxybutyric acid, 2TMS; 1 | -0.11000 | -0.50200 | 0.2830 | 0.584000 | 0.7820 |
| ## 57 | Arachidic acid; 46             | 0.10300  | -0.28900 | 0.4960 | 0.605000 | 0.7940 |
| ## 58 | 11-Eicosenoic acid; 35         | 0.09700  | -0.29500 | 0.4890 | 0.628000 | 0.7940 |
| ## 59 | Glycerol; 57                   | 0.09550  | -0.29700 | 0.4880 | 0.633000 | 0.7940 |
| ## 60 | Heptadecanoic acid; 60         | 0.08850  | -0.30400 | 0.4810 | 0.658000 | 0.7940 |
| ## 61 | Docosahexaenoic acid; 53       | 0.08830  | -0.30400 | 0.4800 | 0.659000 | 0.7940 |
| ## 62 | alpha-ketoglutaric acid, TMS M | 0.08710  | -0.30500 | 0.4790 | 0.663000 | 0.7940 |
| ## 63 | 1-Monopalmitin; 37             | 0.08600  | -0.30600 | 0.4780 | 0.667000 | 0.7940 |
| ## 64 | Hydroxyproline; 64             | 0.07640  | -0.31600 | 0.4690 | 0.702000 | 0.8220 |
| ## 65 | Nonadecanoic acid; 66          | 0.07090  | -0.32100 | 0.4630 | 0.723000 | 0.8220 |
| ## 66 | 2-Hydroxybutyric acid, 2TMS; 2 | -0.07090 | -0.46300 | 0.3210 | 0.723000 | 0.8220 |
| ## 67 | Octanoic acid; 68              | 0.06630  | -0.32600 | 0.4580 | 0.740000 | 0.8290 |
| ## 68 | Lactic acid; 29                | 0.04970  | -0.34200 | 0.4420 | 0.804000 | 0.8690 |
| ## 69 | L-5-Oxoproline; 63             | -0.04640 | -0.43800 | 0.3460 | 0.817000 | 0.8690 |
| ## 70 | 4-Hydroxybutanoic acid; 43     | -0.04530 | -0.43700 | 0.3470 | 0.821000 | 0.8690 |
| ## 71 | 2-Palmitoylglycerol; 39        | -0.04470 | -0.43700 | 0.3470 | 0.823000 | 0.8690 |
| ## 72 | Heptadecanoic acid; 61         | 0.03620  | -0.35600 | 0.4280 | 0.857000 | 0.8870 |
| ## 73 | Linoleic acid, TMS; 4          | 0.03320  | -0.35900 | 0.4250 | 0.868000 | 0.8870 |
| ## 74 | Glutamic acid, 3TMS; 8         | -0.03140 | -0.42400 | 0.3610 | 0.875000 | 0.8870 |
| ## 75 | Glycerol; 58                   | 0.00871  | -0.38300 | 0.4010 | 0.965000 | 0.9650 |

### 4.1.3 Adjusted Model with eGFR

```
## [1] "Fitting models:"  
## [1] "~ Charcot.at.DATE + Age.x + Gender.x + Hba1c_baseline + CALSBP + bmi + Smoking + Statin + log_B  
## [1] ""
```

#### 4.1.3.1 Forest Plot of Model Coefficients

```
## Warning: Ignoring unknown aesthetics: x
## Ignoring unknown aesthetics: x
```

```
## NULL
```

### 4.1.3.2 Tables of Model Coefficients

```

## [1] ""
## [1] "Table: Charcot.at.DATEJA"
## [1] " (from model: "
## [1] " ~ Charcot.at.DATE + Age.x + Gender.x + Hba1c_baseline"
## [1] " + CALSBP + bmi + Smoking + Statin + log_Blood_TGA +"
## [1] " Total_cholesterol + egfr)"
## [1] ""
## [1] "No significant associations at p.adj < 0.05"
## [1] ""
## [1] "Table: Age.x"
## [1] " (from model: "
## [1] " ~ Charcot.at.DATE + Age.x + Gender.x + Hba1c_baseline"
## [1] " + CALSBP + bmi + Smoking + Statin + log_Blood_TGA +"
## [1] " Total_cholesterol + egfr)"
## [1] ""
##
## Name Coefficient CI.L CI.R p.value p.adj
## 1 Eicosapentaenoic acid; 55 0.02430 0.01760 0.0311 3.04e-12 2.28e-10
## 2 Docosahexaenoic acid; 53 0.01510 0.00825 0.0219 1.58e-05 5.92e-04
## 3 Glyceric acid; 30 0.01160 0.00478 0.0184 8.68e-04 1.63e-02
## 4 Pyruvic acid; 31 0.01140 0.00444 0.0183 1.31e-03 1.63e-02
## 5 alpha-Tocopherol; 26 0.01110 0.00430 0.0179 1.41e-03 1.63e-02
## 6 Decanoic acid; 52 0.01120 0.00432 0.0181 1.44e-03 1.63e-02
## 7 alpha-ketoglutaric acid, TMS M 0.01120 0.00430 0.0182 1.52e-03 1.63e-02
## 8 4-Hydroxybenzeneacetic acid; 4 0.00989 0.00313 0.0167 4.17e-03 3.83e-02
## 9 Aminomalonic acid; 45 0.00995 0.00307 0.0168 4.59e-03 3.83e-02
## 10 3-Indoleacetic acid; 40 0.00961 0.00274 0.0165 6.15e-03 4.62e-02
## [1] ""
## [1] "Table: Gender.x"
## [1] " (from model: "
## [1] " ~ Charcot.at.DATE + Age.x + Gender.x + Hba1c_baseline"
## [1] " + CALSBP + bmi + Smoking + Statin + log_Blood_TGA +"
## [1] " Total_cholesterol + egfr)"
## [1] ""
##
## Name Coefficient CI.L CI.R p.value p.adj
## 1 4-Deoxytetronic acid; 33 0.425 0.2670 0.5830 1.38e-07 1.04e-05
## 2 Glyceric acid; 30 -0.370 -0.5280 -0.2120 4.54e-06 1.33e-04
## 3 Myristoleic acid; 65 -0.370 -0.5290 -0.2110 5.33e-06 1.33e-04
## 4 Proline, 2TMS; 21 0.352 0.1940 0.5110 1.38e-05 2.58e-04
## 5 Tartronic acid; 73 -0.344 -0.5020 -0.1850 2.20e-05 3.30e-04
## 6 Dodecanoic acid; 54 -0.333 -0.4930 -0.1740 4.19e-05 5.24e-04
## 7 Cholesterol, TMS; 23 -0.311 -0.4660 -0.1570 8.07e-05 8.64e-04
## 8 Oleic acid, TMS; 3 -0.313 -0.4720 -0.1530 1.27e-04 1.19e-03
## 9 Methionine, 2TMS; 16 0.309 0.1500 0.4680 1.42e-04 1.19e-03
## 10 Citric acid, 4TMS; 6 -0.305 -0.4630 -0.1470 1.58e-04 1.19e-03
## 11 Docosahexaenoic acid; 53 -0.290 -0.4480 -0.1320 3.33e-04 2.27e-03
## 12 Glycine, 3TMS; 17 -0.287 -0.4460 -0.1290 3.95e-04 2.47e-03
## 13 Leucine, 2TMS; 19 0.272 0.1140 0.4310 7.56e-04 4.17e-03
## 14 Valine, 2TMS; 20 0.267 0.1110 0.4240 8.30e-04 4.17e-03
## 15 Aminomalonic acid; 45 -0.271 -0.4300 -0.1120 8.46e-04 4.17e-03
## 16 Decanoic acid; 52 -0.270 -0.4290 -0.1110 8.90e-04 4.17e-03
## 17 Hydroxyproline; 64 0.258 0.0975 0.4180 1.63e-03 7.06e-03
## 18 Stearic acid, TMS; 2 -0.256 -0.4160 -0.0963 1.69e-03 7.06e-03

```



```

## 19      Tridecanoic acid; 74      -0.255 -0.4160 -0.0951 1.82e-03 7.17e-03
## 20      Palmitic acid, TMS; 5      -0.250 -0.4100 -0.0913 2.06e-03 7.41e-03
## 21      Heptadecanoic acid; 61     -0.252 -0.4130 -0.0916 2.09e-03 7.41e-03
## 22      Heptadecanoic acid; 60     -0.251 -0.4120 -0.0907 2.17e-03 7.41e-03
## 23      Glutamic acid, 3TMS; 8      0.239  0.0811  0.3970 3.02e-03 9.83e-03
## 24 2-hydroxy Isovaleric acid; 38    0.237  0.0768  0.3970 3.75e-03 1.17e-02
## 25      Isoleucine, 2TMS; 18       0.231  0.0737  0.3880 4.01e-03 1.20e-02
## 26      Tyrosine; 75                -0.227 -0.3870 -0.0666 5.55e-03 1.57e-02
## 27      Nonadecanoic acid; 66       -0.227 -0.3880 -0.0664 5.64e-03 1.57e-02
## 28      Succinic acid, 2TMS; 7      -0.217 -0.3780 -0.0567 8.03e-03 2.15e-02
## [1] ""
## [1] "Table: Hba1c_baseline"
## [1] " (from model: "
## [1] " ~ Charcot.at.DATE + Age.x + Gender.x + Hba1c_baseline"
## [1] " + CALSBP + bmi + Smoking + Statin + log_Blood_TGA +"
## [1] " Total_cholesterol + egfr)"
## [1] ""
##
##          Name Coefficient   CI.L   CI.R p.value  p.adj
## 1 Eicosapentaenoic acid; 55    -0.137 -0.2070 -0.0664 0.000140 0.00928
## 2   Tridecanoic acid; 74       -0.134 -0.2060 -0.0625 0.000247 0.00928
## 3 Docosahexaenoic acid; 53     -0.124 -0.1940 -0.0530 0.000608 0.01330
## 4   Glyceric acid; 30          -0.122 -0.1920 -0.0514 0.000709 0.01330
## 5   Alanine, 2TMS; 25          0.119  0.0472  0.1900 0.001150 0.01590
## 6   Arabinopyranose; 51         0.116  0.0450  0.1880 0.001410 0.01590
## 7   Valine, 2TMS; 20           0.113  0.0429  0.1830 0.001580 0.01590
## 8   Ethanolamine; 56           0.115  0.0433  0.1870 0.001700 0.01590
## 9   Decanoic acid; 52          -0.101 -0.1720 -0.0298 0.005420 0.04520
## [1] ""
## [1] "Table: CALSBP"
## [1] " (from model: "
## [1] " ~ Charcot.at.DATE + Age.x + Gender.x + Hba1c_baseline"
## [1] " + CALSBP + bmi + Smoking + Statin + log_Blood_TGA +"
## [1] " Total_cholesterol + egfr)"
## [1] ""
## [1] "No significant associations at p.adj < 0.05"
## [1] ""
## [1] "Table: bmi"
## [1] " (from model: "
## [1] " ~ Charcot.at.DATE + Age.x + Gender.x + Hba1c_baseline"
## [1] " + CALSBP + bmi + Smoking + Statin + log_Blood_TGA +"
## [1] " Total_cholesterol + egfr)"
## [1] ""
##
##          Name Coefficient   CI.L   CI.R p.value  p.adj
## 1   Glutamic acid, 3TMS; 8      0.0462  0.0260  0.06640 7.70e-06 0.000577
## 2 2-Hydroxybutyric acid, 2TMS; 2  0.0402  0.0201  0.06040 9.52e-05 0.003150
## 3   Campesterol; 49            -0.0396 -0.0598 -0.01940 1.26e-04 0.003150
## 4   Decanoic acid; 52          -0.0308 -0.0512 -0.01040 3.08e-03 0.045800
## 5   Pyruvic acid; 31           -0.0306 -0.0511 -0.01010 3.48e-03 0.045800
## 6   1,3-Propanediol; 34        -0.0304 -0.0510 -0.00982 3.83e-03 0.045800
## 7   Lactic acid; 29            0.0299  0.0094  0.05040 4.28e-03 0.045800
## 8   Arachidic acid; 46         -0.0294 -0.0500 -0.00885 5.07e-03 0.047500
## [1] ""
## [1] "Table: Smoking"
## [1] " (from model: "

```

```

## [1] " ~ Charcot.at.DATE + Age.x + Gender.x + Hba1c_baseline"
## [1] " + CALSBP + bmi + Smoking + Statin + log_Blood_TGA +"
## [1] " Total_cholesterol + egfr)"
## [1] ""
##
## Name Coefficient CI.L CI.R p.value p.adj
## 1 Docosahexaenoic acid; 53 -0.384 -0.574 -0.1940 7.49e-05 0.00373
## 2 Glutamic acid, 3TMS; 8 0.374 0.185 0.5640 1.12e-04 0.00373
## 3 3-Indolepropionic acid; 41 -0.372 -0.564 -0.1800 1.49e-04 0.00373
## 4 Tartronic acid; 73 -0.354 -0.545 -0.1640 2.71e-04 0.00489
## 5 Glyceric acid; 30 -0.348 -0.537 -0.1580 3.26e-04 0.00489
## 6 alpha-Tocopherol; 26 -0.309 -0.499 -0.1200 1.38e-03 0.01690
## 7 Valine, 2TMS; 20 -0.304 -0.492 -0.1150 1.58e-03 0.01690
## 8 Citric acid, 4TMS; 6 -0.269 -0.459 -0.0795 5.45e-03 0.04830
## 9 Campesterol; 49 -0.264 -0.454 -0.0745 6.35e-03 0.04830
## 10 Benzeneacetic acid; 47 -0.267 -0.459 -0.0750 6.44e-03 0.04830
## [1] ""
## [1] "Table: Statin"
## [1] " (from model: "
## [1] " ~ Charcot.at.DATE + Age.x + Gender.x + Hba1c_baseline"
## [1] " + CALSBP + bmi + Smoking + Statin + log_Blood_TGA +"
## [1] " Total_cholesterol + egfr)"
## [1] ""
##
## Name Coefficient CI.L CI.R p.value p.adj
## 1 L-5-Oxoproline; 63 -0.313 -0.488 -0.138 0.000456 0.0342
## [1] ""
## [1] "Table: log_Blood_TGA"
## [1] " (from model: "
## [1] " ~ Charcot.at.DATE + Age.x + Gender.x + Hba1c_baseline"
## [1] " + CALSBP + bmi + Smoking + Statin + log_Blood_TGA +"
## [1] " Total_cholesterol + egfr)"
## [1] ""
##
## Name Coefficient CI.L CI.R p.value p.adj
## 1 Palmitic acid, TMS; 5 0.300 0.1710 0.4290 5.43e-06 0.000248
## 2 Dodecanoic acid; 54 0.293 0.1640 0.4220 9.00e-06 0.000248
## 3 Stearic acid, TMS; 2 0.293 0.1630 0.4220 9.92e-06 0.000248
## 4 Decanoic acid; 52 0.272 0.1430 0.4010 3.62e-05 0.000679
## 5 Octanoic acid; 68 0.269 0.1390 0.3990 5.06e-05 0.000759
## 6 Arachidic acid; 46 0.254 0.1240 0.3840 1.35e-04 0.001680
## 7 2-Hydroxybutyric acid, 2TMS; 2 0.230 0.1020 0.3580 4.21e-04 0.004510
## 8 Oleic acid, TMS; 3 0.224 0.0940 0.3530 7.27e-04 0.006820
## 9 Arabinopyranose; 51 0.206 0.0763 0.3360 1.87e-03 0.015600
## 10 Glyceryl-glycoside; 59 0.199 0.0697 0.3280 2.57e-03 0.019300
## 11 Isoleucine, 2TMS; 18 0.191 0.0637 0.3190 3.32e-03 0.022600
## 12 3,4-Dihydroxybutanoic acid; 27 0.184 0.0574 0.3100 4.37e-03 0.027300
## 13 Heptadecanoic acid; 60 0.184 0.0537 0.3140 5.64e-03 0.031300
## 14 Valine, 2TMS; 20 0.179 0.0517 0.3060 5.84e-03 0.031300
## 15 Lactic acid; 29 0.181 0.0508 0.3110 6.42e-03 0.032100
## 16 Myristoleic acid; 65 0.174 0.0449 0.3030 8.25e-03 0.038700
## 17 Heptadecanoic acid; 61 0.172 0.0415 0.3020 9.77e-03 0.039900
## 18 Glutamic acid, 3TMS; 8 0.168 0.0402 0.2960 1.00e-02 0.039900
## 19 Pyruvic acid; 31 0.171 0.0406 0.3010 1.01e-02 0.039900
## 20 Ribonic acid; 72 0.161 0.0354 0.2860 1.20e-02 0.043400
## 21 4-Hydroxybenzeneacetic acid; 4 0.162 0.0355 0.2890 1.21e-02 0.043400
## 22 Aminomalonic acid; 45 -0.161 -0.2900 -0.0317 1.46e-02 0.049900

```

```

## [1] ""
## [1] "Table: Total_cholesterol"
## [1] " (from model: "
## [1] " ~ Charcot.at.DATE + Age.x + Gender.x + Hba1c_baseline"
## [1] " + CALSBP + bmi + Smoking + Statin + log_Blood_TGA +"
## [1] " Total_cholesterol + egfr)"
## [1] ""
##
## Name Coefficient CI.L CI.R p.value p.adj
## 1 Cholesterol, TMS; 23 0.456 0.3630 0.5480 1.67e-21 1.25e-19
## 2 Campesterol; 49 0.371 0.2770 0.4660 2.23e-14 8.37e-13
## 3 alpha-Tocopherol; 26 0.325 0.2300 0.4200 2.09e-11 5.23e-10
## 4 Benzeneacetic acid; 47 -0.183 -0.2790 -0.0876 1.78e-04 2.94e-03
## 5 Proline, 2TMS; 21 -0.179 -0.2740 -0.0837 2.32e-04 2.94e-03
## 6 Linoleic acid, TMS; 4 0.179 0.0828 0.2740 2.65e-04 2.94e-03
## 7 4-Hydroxybutanoic acid; 43 -0.179 -0.2750 -0.0828 2.74e-04 2.94e-03
## 8 Isoleucine, 2TMS; 18 -0.173 -0.2670 -0.0787 3.27e-04 3.07e-03
## 9 L-5-Oxoproline; 63 -0.171 -0.2670 -0.0750 4.93e-04 4.11e-03
## 10 Glycine, 3TMS; 17 -0.157 -0.2520 -0.0621 1.21e-03 9.06e-03
## 11 Tyrosine; 75 -0.155 -0.2510 -0.0588 1.60e-03 1.09e-02
## 12 Methionine, 2TMS; 16 -0.152 -0.2470 -0.0565 1.81e-03 1.13e-02
## 13 Threonine, 3TMS; 12 -0.146 -0.2420 -0.0497 2.97e-03 1.71e-02
## 14 Eicosapentaenoic acid; 55 0.141 0.0471 0.2360 3.31e-03 1.77e-02
## 15 2,4-Dihydroxybutanoic acid; 28 -0.137 -0.2300 -0.0450 3.58e-03 1.79e-02
## 16 Docosahexaenoic acid; 53 0.139 0.0445 0.2340 4.00e-03 1.87e-02
## 17 Arabinopyranose; 51 -0.138 -0.2340 -0.0425 4.70e-03 2.07e-02
## 18 4-Hydroxybenzeneacetic acid; 4 -0.134 -0.2280 -0.0403 5.09e-03 2.08e-02
## 19 Alanine, 2TMS; 25 -0.137 -0.2320 -0.0407 5.28e-03 2.08e-02
## 20 Serine, 3TMS; 14 -0.132 -0.2280 -0.0362 6.93e-03 2.60e-02
## 21 2-Palmitoylglycerol; 39 0.132 0.0356 0.2280 7.31e-03 2.61e-02
## 22 Glyceryl-glycoside; 59 -0.127 -0.2230 -0.0319 8.98e-03 3.06e-02
## 23 Hydroxylamine; 62 -0.125 -0.2220 -0.0291 1.08e-02 3.51e-02
## [1] ""
## [1] "Table: egfr"
## [1] " (from model: "
## [1] " ~ Charcot.at.DATE + Age.x + Gender.x + Hba1c_baseline"
## [1] " + CALSBP + bmi + Smoking + Statin + log_Blood_TGA +"
## [1] " Total_cholesterol + egfr)"
## [1] ""
##
## Name Coefficient CI.L CI.R p.value
## 1 Myo inositol 6TMS; 1 -0.01620 -0.019100 -0.013300 6.96e-27
## 2 Ribitol; 71 -0.01550 -0.018500 -0.012600 1.07e-24
## 3 Creatinine; 50 -0.01510 -0.018100 -0.012100 7.54e-23
## 4 Ribonic acid; 72 -0.01460 -0.017500 -0.011600 7.91e-22
## 5 2,4-Dihydroxybutanoic acid; 28 -0.01440 -0.017400 -0.011500 1.43e-21
## 6 3,4-Dihydroxybutanoic acid; 27 -0.01270 -0.015700 -0.009780 5.84e-17
## 7 4-Hydroxybenzeneacetic acid; 4 -0.01130 -0.014300 -0.008320 1.43e-13
## 8 4-Deoxytetrionic acid; 33 -0.01130 -0.014300 -0.008300 2.15e-13
## 9 4-Deoxytetrionic acid; 32 -0.01020 -0.013200 -0.007200 4.47e-11
## 10 Isoleucine, 2TMS; 18 0.00926 0.006270 0.012200 1.45e-09
## 11 2-Hydroxybutyric acid, 2TMS; 2 0.00925 0.006260 0.012200 1.60e-09
## 12 Valine, 2TMS; 20 0.00832 0.005350 0.011300 4.70e-08
## 13 Citric acid, 4TMS; 6 -0.00796 -0.011000 -0.004960 2.19e-07
## 14 Pyroglutamic acid; 69 -0.00789 -0.010900 -0.004870 3.49e-07
## 15 Hydroxyproline; 64 -0.00774 -0.010800 -0.004700 6.53e-07

```

|       |                                |          |           |           |          |
|-------|--------------------------------|----------|-----------|-----------|----------|
| ## 16 | 3-Indoleacetic acid; 40        | -0.00691 | -0.009930 | -0.003890 | 7.53e-06 |
| ## 17 | Glyceryl-glycoside; 59         | -0.00663 | -0.009660 | -0.003610 | 1.81e-05 |
| ## 18 | 4-Hydroxyphenyllactic acid; 44 | -0.00635 | -0.009380 | -0.003320 | 4.13e-05 |
| ## 19 | Serine, 3TMS; 14               | 0.00587  | 0.002830  | 0.008900  | 1.54e-04 |
| ## 20 | Octanoic acid; 68              | 0.00583  | 0.002790  | 0.008870  | 1.74e-04 |
| ## 21 | Leucine, 2TMS; 19              | 0.00575  | 0.002740  | 0.008750  | 1.83e-04 |
| ## 22 | Stearic acid, TMS; 2           | 0.00565  | 0.002610  | 0.008680  | 2.70e-04 |
| ## 23 | Methionine, 2TMS; 16           | 0.00526  | 0.002240  | 0.008280  | 6.56e-04 |
| ## 24 | Tyrosine; 75                   | 0.00510  | 0.002060  | 0.008150  | 1.03e-03 |
| ## 25 | Glycine, 3TMS; 17              | -0.00481 | -0.007830 | -0.001800 | 1.77e-03 |
| ## 26 | 2-hydroxy Isovaleric acid; 38  | 0.00485  | 0.001800  | 0.007890  | 1.81e-03 |
| ## 27 | Eicosapentaenoic acid; 55      | 0.00473  | 0.001750  | 0.007720  | 1.90e-03 |
| ## 28 | Fumaric acid, 2TMS; 9          | -0.00456 | -0.007600 | -0.001520 | 3.29e-03 |
| ## 29 | Cholesterol, TMS; 23           | 0.00424  | 0.001300  | 0.007170  | 4.66e-03 |
| ## 30 | Palmitic acid, TMS; 5          | 0.00417  | 0.001150  | 0.007200  | 6.84e-03 |
| ## 31 | Malic acid, 3TMS; 11           | -0.00406 | -0.007100 | -0.001020 | 8.95e-03 |
| ## 32 | Glyceric acid; 30              | 0.00379  | 0.000794  | 0.006790  | 1.32e-02 |
| ## 33 | Docosahexaenoic acid; 53       | 0.00373  | 0.000729  | 0.006730  | 1.49e-02 |
| ## 34 | Glycerol; 57                   | 0.00379  | 0.000735  | 0.006850  | 1.51e-02 |
| ## 35 | Alanine, 2TMS; 25              | -0.00365 | -0.006690 | -0.000610 | 1.86e-02 |
| ## 36 | Benzeneacetic acid; 47         | -0.00355 | -0.006590 | -0.000519 | 2.17e-02 |
| ##    | p.adj                          |          |           |           |          |
| ## 1  |                                | 5.22e-25 |           |           |          |
| ## 2  |                                | 4.03e-23 |           |           |          |
| ## 3  |                                | 1.88e-21 |           |           |          |
| ## 4  |                                | 1.48e-20 |           |           |          |
| ## 5  |                                | 2.15e-20 |           |           |          |
| ## 6  |                                | 7.30e-16 |           |           |          |
| ## 7  |                                | 1.54e-12 |           |           |          |
| ## 8  |                                | 2.01e-12 |           |           |          |
| ## 9  |                                | 3.73e-10 |           |           |          |
| ## 10 |                                | 1.09e-08 |           |           |          |
| ## 11 |                                | 1.09e-08 |           |           |          |
| ## 12 |                                | 2.94e-07 |           |           |          |
| ## 13 |                                | 1.27e-06 |           |           |          |
| ## 14 |                                | 1.87e-06 |           |           |          |
| ## 15 |                                | 3.27e-06 |           |           |          |
| ## 16 |                                | 3.53e-05 |           |           |          |
| ## 17 |                                | 7.98e-05 |           |           |          |
| ## 18 |                                | 1.72e-04 |           |           |          |
| ## 19 |                                | 6.07e-04 |           |           |          |
| ## 20 |                                | 6.52e-04 |           |           |          |
| ## 21 |                                | 6.54e-04 |           |           |          |
| ## 22 |                                | 9.19e-04 |           |           |          |
| ## 23 |                                | 2.14e-03 |           |           |          |
| ## 24 |                                | 3.23e-03 |           |           |          |
| ## 25 |                                | 5.22e-03 |           |           |          |
| ## 26 |                                | 5.22e-03 |           |           |          |
| ## 27 |                                | 5.28e-03 |           |           |          |
| ## 28 |                                | 8.82e-03 |           |           |          |
| ## 29 |                                | 1.21e-02 |           |           |          |
| ## 30 |                                | 1.71e-02 |           |           |          |
| ## 31 |                                | 2.17e-02 |           |           |          |
| ## 32 |                                | 3.09e-02 |           |           |          |

## 33 3.33e-02  
## 34 3.33e-02  
## 35 3.99e-02  
## 36 4.53e-02

#### 4.1.3.3 Table with All Metabolites

```
## [1] ""
## [1] "Table: Charcot.at.DATEJA"
## [1] " (from model: "
## [1] " ~ Charcot.at.DATE + Age.x + Gender.x + Hba1c_baseline"
## [1] " + CALSBP + bmi + Smoking + Statin + log_Blood_TGA +"
## [1] " Total_cholesterol + egfr)"
## [1] ""
##
## Name Coefficient CI.L CI.R p.value p.adj
## 1 Proline, 2TMS; 21 -0.66300 -1.05000 -0.2750 0.000826 0.0619
## 2 Threonine, 3TMS; 12 -0.62500 -1.02000 -0.2320 0.001820 0.0684
## 3 Leucine, 2TMS; 19 -0.56000 -0.94800 -0.1730 0.004650 0.1160
## 4 3,4-Dihydroxybutanoic acid; 27 0.51000 0.12900 0.8910 0.008760 0.1460
## 5 Valine, 2TMS; 20 -0.50600 -0.89000 -0.1220 0.009760 0.1460
## 6 Fumaric acid, 2TMS; 9 0.48500 0.09260 0.8770 0.015400 0.1930
## 7 Ribitol; 70 0.45800 0.06680 0.8500 0.021800 0.2060
## 8 2,4-Dihydroxybutanoic acid; 28 0.44100 0.06380 0.8190 0.022000 0.2060
## 9 Serine, 3TMS; 14 -0.43300 -0.82400 -0.0417 0.030100 0.2510
## 10 Methionine, 2TMS; 16 -0.40900 -0.79900 -0.0191 0.039800 0.2900
## 11 Stearic acid, TMS; 2 0.40500 0.01370 0.7960 0.042500 0.2900
## 12 Cholesterol, TMS; 23 0.38100 0.00281 0.7600 0.048300 0.3020
## 13 Ribitol; 71 0.36400 -0.01340 0.7420 0.058700 0.3160
## 14 Ribonic acid; 72 0.35800 -0.02120 0.7370 0.064300 0.3160
## 15 Tartronic acid; 73 0.36400 -0.02440 0.7520 0.066200 0.3160
## 16 Arabinopyranose; 51 0.36500 -0.02630 0.7570 0.067500 0.3160
## 17 Glyceric acid; 30 0.34300 -0.04300 0.7300 0.081500 0.3360
## 18 Dodecanoic acid; 54 0.34400 -0.04630 0.7340 0.084000 0.3360
## 19 Myo inositol 6TMS; 1 0.32700 -0.04930 0.7030 0.088500 0.3360
## 20 4-Deoxytetrionic acid; 33 -0.33400 -0.72100 0.0518 0.089600 0.3360
## 21 alpha-Tocopherol; 26 0.32500 -0.06110 0.7110 0.098900 0.3520
## 22 Pyroglutamic acid; 69 0.32400 -0.06590 0.7150 0.103000 0.3520
## 23 1,3-Propanediol; 34 0.32000 -0.07410 0.7140 0.111000 0.3630
## 24 Creatinine; 50 0.30500 -0.07800 0.6880 0.118000 0.3680
## 25 Glyceryl-glycoside; 59 0.30500 -0.08550 0.6950 0.126000 0.3680
## 26 Arachidonic acid, TMS; 24 0.30600 -0.08770 0.7000 0.128000 0.3680
## 27 Isoleucine, 2TMS; 18 -0.29400 -0.67900 0.0916 0.135000 0.3760
## 28 1-Dodecanol; 36 0.29300 -0.10100 0.6880 0.145000 0.3880
## 29 Myristoleic acid; 65 0.28600 -0.10400 0.6750 0.150000 0.3880
## 30 Decanoic acid; 52 0.28100 -0.10900 0.6710 0.157000 0.3910
## 31 Glycine, 3TMS; 17 0.27800 -0.11100 0.6660 0.162000 0.3910
## 32 Eicosapentaenoic acid; 55 0.25800 -0.12700 0.6430 0.190000 0.4440
## 33 Phenylalanine, 2TMS; 13 -0.25200 -0.64600 0.1420 0.210000 0.4730
## 34 Malic acid, 3TMS; 11 0.24800 -0.14400 0.6410 0.215000 0.4730
## 35 Benzeneacetic acid; 47 0.24100 -0.15000 0.6330 0.226000 0.4850
## 36 Citric acid, 4TMS; 6 0.23500 -0.15200 0.6220 0.234000 0.4870
## 37 Campesterol; 49 0.22800 -0.15900 0.6150 0.248000 0.4890
## 38 Palmitic acid, TMS; 5 0.22800 -0.16200 0.6180 0.251000 0.4890
## 39 2-hydroxy Isovaleric acid; 38 0.22700 -0.16600 0.6190 0.258000 0.4890
## 40 Succinic acid, 2TMS; 7 0.22600 -0.16800 0.6190 0.261000 0.4890
## 41 Bisphenol A; 48 0.22000 -0.17500 0.6160 0.275000 0.5020
## 42 Oleic acid, TMS; 3 0.21200 -0.17900 0.6030 0.288000 0.5150
## 43 Tyrosine; 75 -0.18800 -0.58100 0.2050 0.348000 0.6070
## 44 Tridecanoic acid; 74 0.17600 -0.21700 0.5690 0.379000 0.6340
```

|       |                                |          |          |        |          |        |
|-------|--------------------------------|----------|----------|--------|----------|--------|
| ## 45 | Hydroxylamine; 62              | -0.17600 | -0.57000 | 0.2180 | 0.380000 | 0.6340 |
| ## 46 | Alanine, 2TMS; 25              | -0.16800 | -0.56000 | 0.2240 | 0.400000 | 0.6530 |
| ## 47 | 3-Indoleacetic acid; 40        | 0.15900  | -0.23000 | 0.5490 | 0.422000 | 0.6730 |
| ## 48 | Aminomalonic acid; 45          | 0.14900  | -0.24100 | 0.5380 | 0.455000 | 0.7050 |
| ## 49 | Octanoic acid; 68              | 0.14400  | -0.24800 | 0.5360 | 0.470000 | 0.7050 |
| ## 50 | Glycerol; 57                   | 0.14500  | -0.25000 | 0.5390 | 0.472000 | 0.7050 |
| ## 51 | Docosahexaenoic acid; 53       | 0.14000  | -0.24800 | 0.5270 | 0.480000 | 0.7050 |
| ## 52 | Pyruvic acid; 31               | 0.13300  | -0.26000 | 0.5250 | 0.507000 | 0.7180 |
| ## 53 | Nonanoic acid; 67              | 0.13300  | -0.26100 | 0.5280 | 0.508000 | 0.7180 |
| ## 54 | 4-Hydroxybenzeneacetic acid; 4 | 0.12500  | -0.25800 | 0.5080 | 0.523000 | 0.7180 |
| ## 55 | Ethanolamine; 56               | -0.12700 | -0.52100 | 0.2670 | 0.526000 | 0.7180 |
| ## 56 | 4-Deoxytetroneic acid; 32      | 0.11900  | -0.27200 | 0.5090 | 0.551000 | 0.7380 |
| ## 57 | 3-Hydroxybutyric acid, 2TMS; 1 | -0.11300 | -0.50800 | 0.2830 | 0.576000 | 0.7540 |
| ## 58 | 3-Indolepropionic acid; 41     | -0.11000 | -0.50100 | 0.2820 | 0.583000 | 0.7540 |
| ## 59 | Arachidic acid; 46             | 0.10700  | -0.28600 | 0.5000 | 0.594000 | 0.7550 |
| ## 60 | alpha-ketoglutaric acid, TMS M | 0.09440  | -0.29900 | 0.4880 | 0.638000 | 0.7950 |
| ## 61 | 1-Monopalmitin; 37             | 0.09240  | -0.30300 | 0.4870 | 0.646000 | 0.7950 |
| ## 62 | 11-Eicosenoic acid; 35         | 0.08740  | -0.30600 | 0.4810 | 0.663000 | 0.8020 |
| ## 63 | Heptadecanoic acid; 60         | 0.08010  | -0.31300 | 0.4730 | 0.689000 | 0.8210 |
| ## 64 | Nonadecanoic acid; 66          | 0.07160  | -0.32200 | 0.4650 | 0.721000 | 0.8450 |
| ## 65 | Lactic acid; 29                | 0.06840  | -0.32400 | 0.4610 | 0.732000 | 0.8450 |
| ## 66 | 2-Hydroxybutyric acid, 2TMS; 2 | 0.05810  | -0.32800 | 0.4440 | 0.768000 | 0.8720 |
| ## 67 | Linoleic acid, TMS; 4          | 0.04900  | -0.34300 | 0.4410 | 0.806000 | 0.9010 |
| ## 68 | 4-Hydroxybutanoic acid; 43     | -0.04640 | -0.44000 | 0.3470 | 0.817000 | 0.9010 |
| ## 69 | Heptadecanoic acid; 61         | 0.04090  | -0.35200 | 0.4340 | 0.838000 | 0.9110 |
| ## 70 | Glycerol; 58                   | -0.03390 | -0.43000 | 0.3620 | 0.867000 | 0.9280 |
| ## 71 | Hydroxyproline; 64             | -0.02660 | -0.41900 | 0.3650 | 0.894000 | 0.9380 |
| ## 72 | 4-Hydroxyphenyllactic acid; 44 | 0.02480  | -0.36600 | 0.4160 | 0.901000 | 0.9380 |
| ## 73 | L-5-Oxoproline; 63             | -0.02190 | -0.41500 | 0.3710 | 0.913000 | 0.9380 |
| ## 74 | 2-Palmitoylglycerol; 39        | -0.01480 | -0.40900 | 0.3790 | 0.941000 | 0.9540 |
| ## 75 | Glutamic acid, 3TMS; 8         | -0.00921 | -0.39600 | 0.3770 | 0.963000 | 0.9630 |

#### 4.1.4 Fully-Adjusted Model

```
## [1] "Fitting models:"  
## [1] "~ Charcot.at.DATE + Age.x + Gender.x + Hba1c_baseline + CALSBP + bmi + Smoking + Statin + log_B  
## [1] ""
```



#### 4.1.4.1 Forest Plot of Model Coefficients

```
## Warning: Ignoring unknown aesthetics: x
## Ignoring unknown aesthetics: x
```

Coefficient: Charcot.at.DATEJA

Model: ~ Charcot.at.DATE + Age.x + Gender.x + Hba1c  
... + Total\_cholesterol + egfr + logUAER



#### 4.1.4.2 Tables of Model Coefficients

```

## [1] ""
## [1] "Table: Charcot.at.DATEJA"
## [1] " (from model: "
## [1] " ~ Charcot.at.DATE + Age.x + Gender.x + Hba1c_baseline"
## [1] " + CALSBP + bmi + Smoking + Statin + log_Blood_TGA +"
## [1] " Total_cholesterol + egfr + logUAER)"
## [1] ""
##
##          Name Coefficient  CI.L  CI.R  p.value  p.adj
## 1 Proline, 2TMS; 21      -0.717 -1.11 -0.321 0.000389 0.0292
## [1] ""
## [1] "Table: Age.x"
## [1] " (from model: "
## [1] " ~ Charcot.at.DATE + Age.x + Gender.x + Hba1c_baseline"
## [1] " + CALSBP + bmi + Smoking + Statin + log_Blood_TGA +"
## [1] " Total_cholesterol + egfr + logUAER)"
## [1] ""
##
##          Name Coefficient  CI.L  CI.R  p.value  p.adj
## 1      Eicosapentaenoic acid; 55      0.0252 0.01790 0.0326 2.35e-11 1.76e-09
## 2      Docosahexaenoic acid; 53      0.0137 0.00634 0.0211 2.77e-04 1.04e-02
## 3 alpha-ketoglutaric acid, TMS M      0.0124 0.00491 0.0200 1.22e-03 3.04e-02
## 4          Pyruvic acid; 31      0.0118 0.00427 0.0193 2.15e-03 4.03e-02
## [1] ""
## [1] "Table: Gender.x"
## [1] " (from model: "
## [1] " ~ Charcot.at.DATE + Age.x + Gender.x + Hba1c_baseline"
## [1] " + CALSBP + bmi + Smoking + Statin + log_Blood_TGA +"
## [1] " Total_cholesterol + egfr + logUAER)"
## [1] ""
##
##          Name Coefficient  CI.L  CI.R  p.value  p.adj
## 1      4-Deoxytetronic acid; 33      0.399 0.2350 0.5640 2.01e-06 0.000151
## 2          Tartronic acid; 73      -0.379 -0.5450 -0.2140 7.53e-06 0.000282
## 3          Glyceric acid; 30      -0.358 -0.5220 -0.1940 2.07e-05 0.000490
## 4      Methionine, 2TMS; 16      0.353 0.1870 0.5190 3.17e-05 0.000490
## 5          Proline, 2TMS; 21      0.348 0.1830 0.5140 3.78e-05 0.000490
## 6      Myristoleic acid; 65      -0.350 -0.5160 -0.1830 3.92e-05 0.000490
## 7          Valine, 2TMS; 20      0.327 0.1640 0.4900 8.57e-05 0.000918
## 8      Cholesterol, TMS; 23      -0.295 -0.4560 -0.1350 3.24e-04 0.002810
## 9          Leucine, 2TMS; 19      0.303 0.1370 0.4680 3.37e-04 0.002810
## 10         Oleic acid, TMS; 3      -0.295 -0.4620 -0.1280 5.41e-04 0.004060
## 11         Citric acid, 4TMS; 6      -0.284 -0.4490 -0.1190 7.50e-04 0.004840
## 12         Dodecanoic acid; 54      -0.286 -0.4530 -0.1200 7.75e-04 0.004840
## 13         Glycine, 3TMS; 17      -0.275 -0.4410 -0.1090 1.17e-03 0.006730
## 14         Isoleucine, 2TMS; 18      0.261 0.0965 0.4250 1.87e-03 0.009640
## 15         Hydroxyproline; 64      0.265 0.0977 0.4320 1.93e-03 0.009640
## 16 2-hydroxy Isovaleric acid; 38      0.258 0.0903 0.4250 2.58e-03 0.012100
## 17         Aminomalonic acid; 45      -0.248 -0.4140 -0.0822 3.41e-03 0.015100
## 18         Docosahexaenoic acid; 53      -0.243 -0.4080 -0.0787 3.81e-03 0.015800
## 19         Decanoic acid; 52      -0.245 -0.4110 -0.0783 4.00e-03 0.015800
## 20         Stearic acid, TMS; 2      -0.239 -0.4060 -0.0718 5.11e-03 0.019200
## 21         Glutamic acid, 3TMS; 8      0.224 0.0598 0.3890 7.55e-03 0.027000
## 22         Succinic acid, 2TMS; 7      -0.221 -0.3890 -0.0531 9.90e-03 0.033500
## 23         Palmitic acid, TMS; 5      -0.218 -0.3840 -0.0516 1.03e-02 0.033500

```

```

## 24          Tridecanoic acid; 74          -0.218 -0.3860 -0.0499 1.11e-02 0.034600
## 25          Nonadecanoic acid; 66         -0.205 -0.3730 -0.0375 1.65e-02 0.049600
## [1] ""
## [1] "Table: Hba1c_baseline"
## [1] " (from model: "
## [1] " ~ Charcot.at.DATE + Age.x + Gender.x + Hba1c_baseline"
## [1] " + CALSBP + bmi + Smoking + Statin + log_Blood_TGA +"
## [1] " Total_cholesterol + egfr + logUAER)"
## [1] ""
##
##          Name Coefficient    CI.L    CI.R p.value  p.adj
## 1          Valine, 2TMS; 20      0.147  0.0740  0.2210 8.46e-05 0.00634
## 2          Ethanolamine; 56      0.137  0.0615  0.2130 3.88e-04 0.01020
## 3          Alanine, 2TMS; 25      0.133  0.0581  0.2090 5.25e-04 0.01020
## 4 Eicosapentaenoic acid; 55      -0.130 -0.2040 -0.0566 5.43e-04 0.01020
## 5          Arabinopyranose; 51     0.118  0.0433  0.1940 2.03e-03 0.03050
## 6 Docosahexaenoic acid; 53      -0.114 -0.1880 -0.0398 2.62e-03 0.03270
## [1] ""
## [1] "Table: CALSBP"
## [1] " (from model: "
## [1] " ~ Charcot.at.DATE + Age.x + Gender.x + Hba1c_baseline"
## [1] " + CALSBP + bmi + Smoking + Statin + log_Blood_TGA +"
## [1] " Total_cholesterol + egfr + logUAER)"
## [1] ""
## [1] "No significant associations at p.adj < 0.05"
## [1] ""
## [1] "Table: bmi"
## [1] " (from model: "
## [1] " ~ Charcot.at.DATE + Age.x + Gender.x + Hba1c_baseline"
## [1] " + CALSBP + bmi + Smoking + Statin + log_Blood_TGA +"
## [1] " Total_cholesterol + egfr + logUAER)"
## [1] ""
##
##          Name Coefficient    CI.L    CI.R p.value  p.adj
## 1          Glutamic acid, 3TMS; 8   0.0450  0.0245  0.0656 1.81e-05 0.00136
## 2 2-Hydroxybutyric acid, 2TMS; 2   0.0415  0.0210  0.0620 7.67e-05 0.00259
## 3          Campesterol; 49          -0.0407 -0.0613 -0.0202 1.04e-04 0.00259
## 4          Decanoic acid; 52        -0.0366 -0.0574 -0.0158 5.75e-04 0.01080
## [1] ""
## [1] "Table: Smoking"
## [1] " (from model: "
## [1] " ~ Charcot.at.DATE + Age.x + Gender.x + Hba1c_baseline"
## [1] " + CALSBP + bmi + Smoking + Statin + log_Blood_TGA +"
## [1] " Total_cholesterol + egfr + logUAER)"
## [1] ""
##
##          Name Coefficient    CI.L    CI.R p.value  p.adj
## 1 3-Indolepropionic acid; 41        -0.351 -0.550 -0.153 0.000538 0.0156
## 2          Tartronic acid; 73        -0.341 -0.538 -0.145 0.000684 0.0156
## 3 Docosahexaenoic acid; 53        -0.339 -0.535 -0.143 0.000700 0.0156
## 4          Glutamic acid, 3TMS; 8    0.334  0.138  0.529 0.000831 0.0156
## 5          Valine, 2TMS; 20          -0.301 -0.495 -0.107 0.002350 0.0302
## 6          Glyceric acid; 30         -0.299 -0.494 -0.103 0.002750 0.0302
## 7          alpha-Tocopherol; 26      -0.298 -0.494 -0.103 0.002820 0.0302
## [1] ""
## [1] "Table: Statin"
## [1] " (from model: "

```

```

## [1] " ~ Charcot.at.DATE + Age.x + Gender.x + Hba1c_baseline"
## [1] " + CALSBP + bmi + Smoking + Statin + log_Blood_TGA +"
## [1] " Total_cholesterol + egfr + logUAER)"
## [1] ""
## [1] "No significant associations at p.adj < 0.05"
## [1] ""
## [1] "Table: log_Blood_TGA"
## [1] " (from model: "
## [1] " ~ Charcot.at.DATE + Age.x + Gender.x + Hba1c_baseline"
## [1] " + CALSBP + bmi + Smoking + Statin + log_Blood_TGA +"
## [1] " Total_cholesterol + egfr + logUAER)"
## [1] ""
##
## Name Coefficient CI.L CI.R p.value p.adj
## 1 Palmitic acid, TMS; 5 0.293 0.1610 0.426 1.52e-05 0.00110
## 2 Dodecanoic acid; 54 0.277 0.1450 0.410 4.43e-05 0.00110
## 3 Stearic acid, TMS; 2 0.278 0.1450 0.411 4.46e-05 0.00110
## 4 Octanoic acid; 68 0.273 0.1400 0.406 5.88e-05 0.00110
## 5 Arachidic acid; 46 0.267 0.1330 0.401 9.37e-05 0.00140
## 6 Decanoic acid; 52 0.252 0.1190 0.385 2.01e-04 0.00252
## 7 2-Hydroxybutyric acid, 2TMS; 2 0.244 0.1130 0.375 2.58e-04 0.00276
## 8 Oleic acid, TMS; 3 0.224 0.0913 0.357 9.65e-04 0.00905
## 9 Lactic acid; 29 0.205 0.0713 0.338 2.65e-03 0.02210
## 10 Glyceryl-glycoside; 59 0.200 0.0673 0.333 3.15e-03 0.02360
## 11 Arabinopyranose; 51 0.188 0.0548 0.321 5.69e-03 0.03880
## 12 3,4-Dihydroxybutanoic acid; 27 0.174 0.0460 0.303 7.80e-03 0.04240
## 13 Heptadecanoic acid; 60 0.182 0.0478 0.315 7.84e-03 0.04240
## 14 Ribonic acid; 72 0.172 0.0439 0.300 8.51e-03 0.04240
## 15 Myristoleic acid; 65 0.177 0.0444 0.309 8.91e-03 0.04240
## 16 Isoleucine, 2TMS; 18 0.174 0.0434 0.305 9.05e-03 0.04240
## 17 4-Hydroxybenzeneacetic acid; 4 0.171 0.0411 0.301 9.95e-03 0.04390
## 18 Fumaric acid, 2TMS; 9 0.173 0.0401 0.306 1.08e-02 0.04490
## [1] ""
## [1] "Table: Total_cholesterol"
## [1] " (from model: "
## [1] " ~ Charcot.at.DATE + Age.x + Gender.x + Hba1c_baseline"
## [1] " + CALSBP + bmi + Smoking + Statin + log_Blood_TGA +"
## [1] " Total_cholesterol + egfr + logUAER)"
## [1] ""
##
## Name Coefficient CI.L CI.R p.value p.adj
## 1 Cholesterol, TMS; 23 0.456 0.3620 0.5510 7.87e-21 5.90e-19
## 2 Campesterol; 49 0.380 0.2830 0.4760 1.87e-14 7.01e-13
## 3 alpha-Tocopherol; 26 0.329 0.2320 0.4250 3.10e-11 7.75e-10
## 4 Benzeneacetic acid; 47 -0.185 -0.2830 -0.0872 2.16e-04 4.05e-03
## 5 Linoleic acid, TMS; 4 0.182 0.0843 0.2800 2.72e-04 4.09e-03
## 6 Isoleucine, 2TMS; 18 -0.170 -0.2660 -0.0734 5.56e-04 5.58e-03
## 7 4-Hydroxybutanoic acid; 43 -0.174 -0.2720 -0.0751 5.65e-04 5.58e-03
## 8 Proline, 2TMS; 21 -0.170 -0.2670 -0.0731 5.95e-04 5.58e-03
## 9 L-5-Oxoproline; 63 -0.168 -0.2660 -0.0694 8.43e-04 7.03e-03
## 10 Eicosapentaenoic acid; 55 0.158 0.0615 0.2540 1.32e-03 9.59e-03
## 11 Methionine, 2TMS; 16 -0.158 -0.2560 -0.0611 1.43e-03 9.59e-03
## 12 Tyrosine; 75 -0.159 -0.2570 -0.0607 1.53e-03 9.59e-03
## 13 Threonine, 3TMS; 12 -0.153 -0.2510 -0.0542 2.38e-03 1.32e-02
## 14 Docosahexaenoic acid; 53 0.149 0.0527 0.2460 2.47e-03 1.32e-02
## 15 Glycine, 3TMS; 17 -0.146 -0.2430 -0.0485 3.33e-03 1.67e-02

```

```

## 16 Alanine, 2TMS; 25 -0.142 -0.2400 -0.0441 4.52e-03 2.12e-02
## 17 4-Hydroxybenzeneacetic acid; 4 -0.129 -0.2250 -0.0334 8.21e-03 3.62e-02
## 18 Glyceryl-glycoside; 59 -0.128 -0.2250 -0.0303 1.03e-02 4.08e-02
## 19 Arabinopyranose; 51 -0.127 -0.2250 -0.0291 1.10e-02 4.08e-02
## 20 Serine, 3TMS; 14 -0.127 -0.2250 -0.0290 1.11e-02 4.08e-02
## 21 Hydroxylamine; 62 -0.127 -0.2260 -0.0287 1.14e-02 4.08e-02
## 22 Malic acid, 3TMS; 11 -0.125 -0.2230 -0.0271 1.24e-02 4.10e-02
## 23 2-Palmitoylglycerol; 39 0.126 0.0270 0.2240 1.26e-02 4.10e-02
## 24 2,4-Dihydroxybutanoic acid; 28 -0.116 -0.2090 -0.0219 1.56e-02 4.88e-02
## [1] ""
## [1] "Table: egfr"
## [1] " (from model: "
## [1] " ~ Charcot.at.DATE + Age.x + Gender.x + Hba1c_baseline"
## [1] " + CALSBP + bmi + Smoking + Statin + log_Blood_TGA +"
## [1] " Total_cholesterol + egfr + logUAER)"
## [1] ""
## Name Coefficient CI.L CI.R p.value
## 1 Myo inositol 6TMS; 1 -0.01600 -0.019200 -0.01290 9.69e-23
## 2 Ribitol; 71 -0.01500 -0.018100 -0.01180 6.87e-20
## 3 Creatinine; 50 -0.01490 -0.018100 -0.01160 4.67e-19
## 4 2,4-Dihydroxybutanoic acid; 28 -0.01440 -0.017600 -0.01120 1.32e-18
## 5 Ribonic acid; 72 -0.01330 -0.016500 -0.01010 4.81e-16
## 6 4-Deoxytetroneic acid; 33 -0.01140 -0.014700 -0.00817 8.43e-12
## 7 3,4-Dihydroxybutanoic acid; 27 -0.01100 -0.014200 -0.00779 2.15e-11
## 8 4-Hydroxybenzeneacetic acid; 4 -0.01110 -0.014300 -0.00785 2.54e-11
## 9 Isoleucine, 2TMS; 18 0.00951 0.006260 0.01280 1.12e-08
## 10 4-Deoxytetroneic acid; 32 -0.00895 -0.012200 -0.00567 1.02e-07
## 11 Citric acid, 4TMS; 6 -0.00863 -0.011900 -0.00536 2.57e-07
## 12 Pyroglutamic acid; 69 -0.00869 -0.012000 -0.00539 2.66e-07
## 13 2-Hydroxybutyric acid, 2TMS; 2 0.00802 0.004770 0.01130 1.43e-06
## 14 4-Hydroxyphenyllactic acid; 44 -0.00776 -0.011100 -0.00446 4.30e-06
## 15 3-Indoleacetic acid; 40 -0.00739 -0.010700 -0.00410 1.13e-05
## 16 Valine, 2TMS; 20 0.00720 0.003970 0.01040 1.31e-05
## 17 Hydroxyproline; 64 -0.00651 -0.009820 -0.00319 1.22e-04
## 18 Glyceryl-glycoside; 59 -0.00628 -0.009580 -0.00298 1.94e-04
## 19 Leucine, 2TMS; 19 0.00584 0.002570 0.00912 4.75e-04
## 20 Serine, 3TMS; 14 0.00591 0.002600 0.00922 4.76e-04
## 21 Glycine, 3TMS; 17 -0.00571 -0.009000 -0.00243 6.65e-04
## 22 Fumaric acid, 2TMS; 9 -0.00550 -0.008810 -0.00219 1.14e-03
## 23 Eicosapentaenoic acid; 55 0.00527 0.002020 0.00851 1.49e-03
## 24 Stearic acid, TMS; 2 0.00530 0.001990 0.00861 1.73e-03
## 25 Methionine, 2TMS; 16 0.00467 0.001390 0.00796 5.37e-03
## 26 Palmitic acid, TMS; 5 0.00401 0.000715 0.00731 1.71e-02
## p.adj
## 1 7.27e-21
## 2 2.57e-18
## 3 1.17e-17
## 4 2.47e-17
## 5 7.21e-15
## 6 1.05e-10
## 7 2.31e-10
## 8 2.38e-10
## 9 9.35e-08
## 10 7.64e-07

```

```

## 11 1.66e-06
## 12 1.66e-06
## 13 8.25e-06
## 14 2.30e-05
## 15 5.67e-05
## 16 6.12e-05
## 17 5.38e-04
## 18 8.09e-04
## 19 1.79e-03
## 20 1.79e-03
## 21 2.37e-03
## 22 3.90e-03
## 23 4.86e-03
## 24 5.42e-03
## 25 1.61e-02
## 26 4.94e-02
## [1] ""
## [1] "Table: logUAER"
## [1] " (from model: "
## [1] " ~ Charcot.at.DATE + Age.x + Gender.x + Hba1c_baseline"
## [1] " + CALSBP + bmi + Smoking + Statin + log_Blood_TGA +"
## [1] " Total_cholesterol + egfr + logUAER)"
## [1] ""
##
## Name Coefficient CI.L CI.R p.value p.adj
## 1 3,4-Dihydroxybutanoic acid; 27 0.0714 0.0316 0.111 0.00045 0.0338

```

#### 4.1.4.3 Table with All Metabolites

```

## [1] ""
## [1] "Table: Charcot.at.DATEJA"
## [1] " (from model: "
## [1] " ~ Charcot.at.DATE + Age.x + Gender.x + Hba1c_baseline"
## [1] " + CALSBP + bmi + Smoking + Statin + log_Blood_TGA +"
## [1] " Total_cholesterol + egfr + logUAER)"
## [1] ""
##
## Name Coefficient CI.L CI.R p.value p.adj
## 1 Proline, 2TMS; 21 -0.7170 -1.1100 -0.32100 0.000389 0.0292
## 2 Threonine, 3TMS; 12 -0.6170 -1.0200 -0.21600 0.002580 0.0638
## 3 Valine, 2TMS; 20 -0.5870 -0.9760 -0.19700 0.003190 0.0638
## 4 Leucine, 2TMS; 19 -0.5910 -0.9860 -0.19600 0.003400 0.0638
## 5 3,4-Dihydroxybutanoic acid; 27 0.5210 0.1360 0.90600 0.008090 0.1210
## 6 Malic acid, 3TMS; 11 0.4770 0.0782 0.87600 0.019100 0.1790
## 7 Cholesterol, TMS; 23 0.4590 0.0750 0.84400 0.019200 0.1790
## 8 Fumaric acid, 2TMS; 9 0.4770 0.0776 0.87600 0.019300 0.1790
## 9 Serine, 3TMS; 14 -0.4690 -0.8680 -0.06910 0.021500 0.1790
## 10 2,4-Dihydroxybutanoic acid; 28 0.4390 0.0571 0.82200 0.024300 0.1820
## 11 Ribitol; 70 0.4430 0.0435 0.84300 0.029800 0.1900
## 12 Stearic acid, TMS; 2 0.4410 0.0418 0.84100 0.030400 0.1900
## 13 Methionine, 2TMS; 16 -0.3920 -0.7890 0.00478 0.052800 0.2900
## 14 Arabinopyranose; 51 0.3870 -0.0122 0.78700 0.057400 0.2900
## 15 Ribonic acid; 72 0.3640 -0.0198 0.74800 0.063100 0.2900
## 16 Ribitol; 71 0.3600 -0.0224 0.74200 0.065000 0.2900
## 17 Dodecanoic acid; 54 0.3740 -0.0244 0.77300 0.065800 0.2900
## 18 Glyceric acid; 30 0.3620 -0.0316 0.75500 0.071500 0.2920
## 19 Arachidonic acid, TMS; 24 0.3610 -0.0400 0.76300 0.077600 0.2920
## 20 Myo inositol 6TMS; 1 0.3410 -0.0393 0.72200 0.078800 0.2920
## 21 Succinic acid, 2TMS; 7 0.3560 -0.0454 0.75700 0.082100 0.2920
## 22 Tartronic acid; 73 0.3470 -0.0492 0.74300 0.086100 0.2920
## 23 1,3-Propanediol; 34 0.3490 -0.0538 0.75100 0.089500 0.2920
## 24 Pyroglutamic acid; 69 0.3320 -0.0665 0.73000 0.102000 0.3120
## 25 Isoleucine, 2TMS; 18 -0.3250 -0.7170 0.06680 0.104000 0.3120
## 26 alpha-Tocopherol; 26 0.3130 -0.0800 0.70600 0.118000 0.3240
## 27 Myristoleic acid; 65 0.3160 -0.0812 0.71400 0.119000 0.3240
## 28 Creatinine; 50 0.3080 -0.0814 0.69700 0.121000 0.3240
## 29 Decanoic acid; 52 0.3020 -0.0959 0.70100 0.137000 0.3530
## 30 4-Deoxytetronic acid; 33 -0.2820 -0.6750 0.11000 0.159000 0.3900
## 31 Oleic acid, TMS; 3 0.2860 -0.1140 0.68500 0.161000 0.3900
## 32 Palmitic acid, TMS; 5 0.2760 -0.1220 0.67300 0.174000 0.3910
## 33 Phenylalanine, 2TMS; 13 -0.2740 -0.6760 0.12900 0.183000 0.3910
## 34 1-Dodecanol; 36 0.2740 -0.1290 0.67700 0.183000 0.3910
## 35 Campesterol; 49 0.2650 -0.1280 0.65700 0.186000 0.3910
## 36 Glycine, 3TMS; 17 0.2660 -0.1300 0.66300 0.188000 0.3910
## 37 Glyceryl-glycoside; 59 0.2470 -0.1510 0.64500 0.224000 0.4540
## 38 Nonanoic acid; 67 0.2440 -0.1590 0.64700 0.236000 0.4540
## 39 Citric acid, 4TMS; 6 0.2380 -0.1560 0.63300 0.236000 0.4540
## 40 2-hydroxy Isovaleric acid; 38 0.2370 -0.1630 0.63800 0.245000 0.4600
## 41 Tyrosine; 75 -0.2180 -0.6180 0.18300 0.286000 0.5240
## 42 Benzeneacetic acid; 47 0.2040 -0.1950 0.60400 0.316000 0.5640
## 43 Eicosapentaenoic acid; 55 0.1960 -0.1960 0.58800 0.326000 0.5680
## 44 Lactic acid; 29 0.1890 -0.2110 0.58900 0.353000 0.6020

```

|       |                                |         |         |         |          |        |
|-------|--------------------------------|---------|---------|---------|----------|--------|
| ## 45 | Tridecanoic acid; 74           | 0.1780  | -0.2240 | 0.57900 | 0.385000 | 0.6260 |
| ## 46 | Glycerol; 57                   | 0.1780  | -0.2250 | 0.58100 | 0.387000 | 0.6260 |
| ## 47 | Alanine, 2TMS; 25              | -0.1740 | -0.5740 | 0.22500 | 0.392000 | 0.6260 |
| ## 48 | Hydroxylamine; 62              | -0.1630 | -0.5650 | 0.24000 | 0.428000 | 0.6580 |
| ## 49 | Pyruvic acid; 31               | 0.1610  | -0.2400 | 0.56200 | 0.432000 | 0.6580 |
| ## 50 | Octanoic acid; 68              | 0.1580  | -0.2420 | 0.55700 | 0.439000 | 0.6580 |
| ## 51 | alpha-ketoglutaric acid, TMS M | 0.1560  | -0.2460 | 0.55700 | 0.447000 | 0.6580 |
| ## 52 | Bisphenol A; 48                | 0.1520  | -0.2520 | 0.55600 | 0.461000 | 0.6650 |
| ## 53 | Aminomalonic acid; 45          | 0.1450  | -0.2520 | 0.54200 | 0.474000 | 0.6660 |
| ## 54 | 2-Hydroxybutyric acid, 2TMS; 2 | 0.1410  | -0.2510 | 0.53400 | 0.480000 | 0.6660 |
| ## 55 | Docosahexaenoic acid; 53       | 0.1380  | -0.2560 | 0.53200 | 0.492000 | 0.6700 |
| ## 56 | 3-Indoleacetic acid; 40        | 0.1360  | -0.2610 | 0.53300 | 0.500000 | 0.6700 |
| ## 57 | Linoleic acid, TMS; 4          | 0.1150  | -0.2850 | 0.51500 | 0.572000 | 0.7420 |
| ## 58 | 3-Hydroxybutyric acid, 2TMS; 1 | -0.1160 | -0.5200 | 0.28800 | 0.574000 | 0.7420 |
| ## 59 | 3-Indolepropionic acid; 41     | -0.1040 | -0.5030 | 0.29600 | 0.610000 | 0.7760 |
| ## 60 | Arachidic acid; 46             | 0.0964  | -0.3050 | 0.49800 | 0.638000 | 0.7880 |
| ## 61 | 4-Hydroxybenzeneacetic acid; 4 | 0.0929  | -0.2970 | 0.48300 | 0.641000 | 0.7880 |
| ## 62 | Ethanolamine; 56               | -0.0907 | -0.4930 | 0.31100 | 0.658000 | 0.7950 |
| ## 63 | 1-Monopalmitin; 37             | 0.0884  | -0.3150 | 0.49200 | 0.667000 | 0.7950 |
| ## 64 | 4-Deoxytetronic acid; 32       | 0.0766  | -0.3190 | 0.47300 | 0.704000 | 0.8250 |
| ## 65 | Heptadecanoic acid; 61         | -0.0669 | -0.4690 | 0.33500 | 0.744000 | 0.8550 |
| ## 66 | 11-Eicosenoic acid; 35         | 0.0612  | -0.3410 | 0.46400 | 0.766000 | 0.8550 |
| ## 67 | Nonadecanoic acid; 66          | 0.0601  | -0.3410 | 0.46200 | 0.769000 | 0.8550 |
| ## 68 | 4-Hydroxyphenyllactic acid; 44 | 0.0581  | -0.3400 | 0.45600 | 0.775000 | 0.8550 |
| ## 69 | L-5-Oxoproline; 63             | 0.0508  | -0.3500 | 0.45200 | 0.804000 | 0.8740 |
| ## 70 | Glycerol; 58                   | 0.0388  | -0.3650 | 0.44300 | 0.851000 | 0.9110 |
| ## 71 | Hydroxyproline; 64             | -0.0343 | -0.4340 | 0.36600 | 0.866000 | 0.9130 |
| ## 72 | 2-Palmitoylglycerol; 39        | -0.0290 | -0.4310 | 0.37300 | 0.888000 | 0.9130 |
| ## 73 | Heptadecanoic acid; 60         | 0.0287  | -0.3730 | 0.43000 | 0.888000 | 0.9130 |
| ## 74 | Glutamic acid, 3TMS; 8         | -0.0223 | -0.4150 | 0.37100 | 0.911000 | 0.9200 |
| ## 75 | 4-Hydroxybutanoic acid; 43     | -0.0207 | -0.4230 | 0.38200 | 0.920000 | 0.9200 |



#### 4.1.5 Compilation



## 4.2 Charcot from DATE

### 4.2.1 Crude Model

#### 4.2.1.1 Forest Plot of Model Coefficients

## Warning: Ignoring unknown aesthetics: x



#### 4.2.1.2 Table with All Metabolites

| Name                        | exp(coef) | Lower 95 % | Upper 95 % | Pr(> z ) | p.adj  |
|-----------------------------|-----------|------------|------------|----------|--------|
| Ribonic acid                | 3.55      | 1.83       | 6.89       | 0.000182 | 0.0136 |
| Ribitol (2)                 | 2.91      | 1.57       | 5.4        | 0.000706 | 0.0265 |
| Creatinine                  | 2.61      | 1.43       | 4.77       | 0.00184  | 0.0427 |
| Myo inositol                | 2.27      | 1.34       | 3.84       | 0.00228  | 0.0427 |
| Tyrosine                    | 0.698     | 0.545      | 0.895      | 0.00455  | 0.0655 |
| 2,4-Dihydroxybutanoic acid  | 2.18      | 1.26       | 3.77       | 0.00524  | 0.0655 |
| Malic acid                  | 2.06      | 1.2        | 3.54       | 0.00868  | 0.093  |
| 3,4-Dihydroxybutanoic acid  | 2.05      | 1.18       | 3.56       | 0.0106   | 0.099  |
| Citric acid                 | 2.1       | 1.18       | 3.76       | 0.012    | 0.1    |
| 4-Hydroxybenzeneacetic acid | 2.2       | 1.17       | 4.14       | 0.0146   | 0.109  |
| Valine                      | 0.597     | 0.389      | 0.918      | 0.0187   | 0.128  |
| Tartronic acid              | 2.28      | 1.13       | 4.62       | 0.022    | 0.137  |
| Benzeneacetic acid          | 2.15      | 1.07       | 4.34       | 0.0324   | 0.177  |
| Leucine                     | 0.729     | 0.546      | 0.975      | 0.0333   | 0.177  |
| Hydroxylamine               | 1.92      | 1.05       | 3.54       | 0.0354   | 0.177  |
| Isoleucine                  | 0.727     | 0.531      | 0.996      | 0.0473   | 0.213  |
| 4-Deoxytetronic acid (1)    | 1.82      | 1          | 3.29       | 0.0484   | 0.213  |
| Ethanolamine                | 0.599     | 0.356      | 1.01       | 0.0536   | 0.223  |
| 2-hydroxy Isovaleric acid   | 0.662     | 0.423      | 1.03       | 0.0702   | 0.277  |
| Methionine                  | 0.696     | 0.453      | 1.07       | 0.0982   | 0.368  |
| Serine                      | 0.696     | 0.443      | 1.09       | 0.115    | 0.411  |
| Pyruvic acid                | 0.697     | 0.436      | 1.12       | 0.132    | 0.436  |
| Glycerol (2)                | 1.57      | 0.87       | 2.84       | 0.134    | 0.436  |
| Linoleic acid               | 1.55      | 0.832      | 2.87       | 0.168    | 0.526  |
| Octanoic acid               | 0.815     | 0.6        | 1.11       | 0.191    | 0.532  |
| Fumaric acid                | 1.44      | 0.824      | 2.53       | 0.2      | 0.532  |
| Glyceric acid               | 1.47      | 0.796      | 2.73       | 0.217    | 0.532  |
| Stearic acid                | 1.37      | 0.83       | 2.27       | 0.218    | 0.532  |
| 4-Deoxytetronic acid (2)    | 1.49      | 0.789      | 2.81       | 0.22     | 0.532  |
| L-5-Oxoproline              | 1.45      | 0.797      | 2.64       | 0.224    | 0.532  |
| Glycerol (1)                | 1.59      | 0.744      | 3.38       | 0.232    | 0.532  |
| Nonanoic acid               | 1.42      | 0.796      | 2.55       | 0.234    | 0.532  |
| 4-Hydroxybutanoic acid      | 1.4       | 0.799      | 2.44       | 0.241    | 0.532  |
| Alanine                     | 0.749     | 0.463      | 1.21       | 0.241    | 0.532  |
| Glyceryl-glycoside          | 1.48      | 0.732      | 3          | 0.274    | 0.557  |
| 4-Hydroxyphenyllactic acid  | 1.44      | 0.749      | 2.76       | 0.275    | 0.557  |
| Proline                     | 0.76      | 0.462      | 1.25       | 0.28     | 0.557  |
| alpha-ketoglutaric acid     | 0.837     | 0.602      | 1.16       | 0.289    | 0.557  |
| Arabinopyranose             | 1.45      | 0.72       | 2.9        | 0.3      | 0.557  |
| Succinic acid               | 1.34      | 0.768      | 2.34       | 0.303    | 0.557  |
| Pyroglutamic acid           | 1.44      | 0.72       | 2.87       | 0.305    | 0.557  |
| Tridecanoic acid            | 1.41      | 0.72       | 2.76       | 0.317    | 0.566  |
| 11-Eicosenoic acid          | 1.38      | 0.722      | 2.63       | 0.33     | 0.575  |
| 3-Hydroxybutyric acid       | 0.767     | 0.443      | 1.33       | 0.345    | 0.587  |
| Glutamic acid               | 0.802     | 0.5        | 1.28       | 0.358    | 0.597  |
| Threonine                   | 0.845     | 0.582      | 1.23       | 0.378    | 0.615  |
| Docosaehaenoic acid         | 1.33      | 0.697      | 2.55       | 0.386    | 0.615  |
| Lactic acid                 | 0.818     | 0.506      | 1.32       | 0.411    | 0.623  |
| Glycine                     | 1.25      | 0.729      | 2.14       | 0.418    | 0.623  |
| 2-Hydroxybutyric acid       | 0.819     | 0.496      | 1.35       | 0.437    | 0.623  |

| Name                   | exp(coef) | Lower 95 % | Upper 95 % | Pr(> z ) | p.adj |
|------------------------|-----------|------------|------------|----------|-------|
| 3-Indoleacetic acid    | 0.825     | 0.503      | 1.35       | 0.447    | 0.623 |
| 3-Indolepropionic acid | 0.86      | 0.574      | 1.29       | 0.464    | 0.623 |
| 1,3-Propanediol        | 1.27      | 0.661      | 2.46       | 0.469    | 0.623 |
| Arachidonic acid       | 1.25      | 0.684      | 2.28       | 0.471    | 0.623 |
| Nonadecanoic acid      | 1.29      | 0.641      | 2.61       | 0.474    | 0.623 |
| Arachidic acid         | 1.2       | 0.729      | 1.96       | 0.478    | 0.623 |
| Ribitol (1)            | 1.22      | 0.703      | 2.11       | 0.481    | 0.623 |
| Decanoic acid          | 0.842     | 0.521      | 1.36       | 0.482    | 0.623 |
| Eicosapentaenoic acid  | 0.846     | 0.51       | 1.4        | 0.515    | 0.655 |
| Hydroxyproline         | 1.19      | 0.677      | 2.09       | 0.546    | 0.682 |
| Myristoleic acid       | 1.13      | 0.64       | 1.99       | 0.675    | 0.823 |
| alpha-Tocopherol       | 1.13      | 0.623      | 2.07       | 0.681    | 0.823 |
| Bisphenol A            | 1.1       | 0.641      | 1.9        | 0.724    | 0.862 |
| Oleic acid             | 1.08      | 0.632      | 1.86       | 0.769    | 0.901 |
| Aminomalonic acid      | 1.07      | 0.617      | 1.87       | 0.802    | 0.925 |
| Cholesterol            | 0.939     | 0.547      | 1.61       | 0.82     | 0.927 |
| Heptadecanoic acid (2) | 1.06      | 0.606      | 1.86       | 0.835    | 0.927 |
| Phenylalanine          | 0.946     | 0.554      | 1.62       | 0.84     | 0.927 |
| 1-Monopalmitin         | 1.05      | 0.605      | 1.83       | 0.854    | 0.928 |
| Palmitic acid          | 1.04      | 0.601      | 1.81       | 0.88     | 0.939 |
| 2-Palmitoylglycerol    | 0.963     | 0.563      | 1.65       | 0.889    | 0.939 |
| Dodecanoic acid        | 1.03      | 0.601      | 1.77       | 0.913    | 0.951 |
| Campesterol            | 1.02      | 0.598      | 1.75       | 0.932    | 0.957 |
| 1-Dodecanol            | 0.994     | 0.573      | 1.73       | 0.984    | 0.99  |
| Heptadecanoic acid (1) | 0.997     | 0.573      | 1.73       | 0.99     | 0.99  |

### 4.2.1.3 Top-Metabolite

```
## Call:
## survival::coxph(formula = survival::Surv(time = Charcot.tdiff,
##     event = Charcot.from.DATE) ~ Ribonic_acid, data = data.km)
##
##   n= 611, number of events= 13
##   (26 observations deleted due to missingness)
##
##           coef exp(coef) se(coef)      z Pr(>|z|)
## Ribonic_acid 1.288      3.625    0.344 3.743 0.000182 ***
## ---
## Signif. codes:  0 '***' 0.001 '**' 0.01 '*' 0.05 '.' 0.1 ' ' 1
##
##           exp(coef) exp(-coef) lower .95 upper .95
## Ribonic_acid      3.625      0.2759      1.847      7.114
##
## Concordance= 0.833 (se = 0.036 )
## Likelihood ratio test= 15.28 on 1 df,  p=9e-05
## Wald test              = 14.01 on 1 df,  p=2e-04
## Score (logrank) test = 12.37 on 1 df,  p=4e-04
```

#### 4.2.1.4 Kaplan-Maier Curve with Median Cutpoint

- Top metabolite



| Number at risk     |  |     |     |     |     |     |    |
|--------------------|--|-----|-----|-----|-----|-----|----|
| Ribonic_acid= >50% |  | 297 | 294 | 291 | 290 | 289 | 42 |
| Ribonic_acid= <50% |  | 314 | 314 | 314 | 314 | 314 | 92 |

| Cumulative number of events |  |   |   |   |   |   |    |
|-----------------------------|--|---|---|---|---|---|----|
| Ribonic_acid= >50%          |  | 0 | 3 | 6 | 7 | 8 | 13 |
| Ribonic_acid= <50%          |  | 0 | 0 | 0 | 0 | 0 | 0  |

## 4.2.2 Adjusted Model



#### 4.2.2.1 Forest Plot of Model Coefficients

```
## NULL
```

#### 4.2.2.2 Table with All Metabolites

| Name                        | exp(coef) | Lower 95 % | Upper 95 % | Pr(> z ) | p.adj  |
|-----------------------------|-----------|------------|------------|----------|--------|
| Ribonic acid                | 3.13      | 1.58       | 6.19       | 0.00106  | 0.0796 |
| Ribitol (2)                 | 2.57      | 1.34       | 4.91       | 0.00435  | 0.128  |
| Creatinine                  | 2.38      | 1.3        | 4.38       | 0.00511  | 0.128  |
| Valine                      | 0.533     | 0.331      | 0.857      | 0.0094   | 0.128  |
| Tyrosine                    | 0.711     | 0.548      | 0.923      | 0.0103   | 0.128  |
| Myo inositol                | 2.05      | 1.17       | 3.61       | 0.0126   | 0.128  |
| 2,4-Dihydroxybutanoic acid  | 2.11      | 1.17       | 3.8        | 0.0128   | 0.128  |
| Citric acid                 | 2.19      | 1.17       | 4.11       | 0.0149   | 0.128  |
| Tartronic acid              | 2.31      | 1.17       | 4.56       | 0.0153   | 0.128  |
| Hydroxylamine               | 2.15      | 1.11       | 4.16       | 0.0226   | 0.155  |
| Isoleucine                  | 0.694     | 0.506      | 0.95       | 0.0228   | 0.155  |
| 3,4-Dihydroxybutanoic acid  | 1.92      | 1.06       | 3.48       | 0.0313   | 0.196  |
| Leucine                     | 0.733     | 0.55       | 0.979      | 0.0351   | 0.202  |
| Benzeneacetic acid          | 2.23      | 1.04       | 4.8        | 0.0403   | 0.202  |
| Ethanolamine                | 0.56      | 0.322      | 0.975      | 0.0404   | 0.202  |
| 4-Hydroxybenzeneacetic acid | 1.99      | 1.01       | 3.94       | 0.047    | 0.215  |
| Malic acid                  | 1.78      | 0.999      | 3.17       | 0.0504   | 0.215  |
| Pyruvic acid                | 0.604     | 0.363      | 1          | 0.0518   | 0.215  |
| 4-Deoxytetronic acid (1)    | 1.83      | 0.989      | 3.38       | 0.0544   | 0.215  |
| 2-hydroxy Isovaleric acid   | 0.65      | 0.411      | 1.03       | 0.0664   | 0.249  |
| Methionine                  | 0.642     | 0.383      | 1.07       | 0.0918   | 0.328  |
| Glycerol (2)                | 1.72      | 0.905      | 3.28       | 0.0977   | 0.333  |
| Octanoic acid               | 0.687     | 0.435      | 1.09       | 0.108    | 0.352  |
| Alanine                     | 0.68      | 0.416      | 1.11       | 0.125    | 0.355  |
| 3-Indoleacetic acid         | 0.642     | 0.364      | 1.13       | 0.125    | 0.355  |
| alpha-ketoglutaric acid     | 0.748     | 0.515      | 1.08       | 0.125    | 0.355  |
| Linoleic acid               | 1.65      | 0.867      | 3.13       | 0.128    | 0.355  |
| Glutamic acid               | 0.695     | 0.427      | 1.13       | 0.144    | 0.385  |
| Proline                     | 0.677     | 0.398      | 1.15       | 0.149    | 0.386  |
| Glyceric acid               | 1.58      | 0.821      | 3.03       | 0.171    | 0.42   |
| L-5-Oxoproline              | 1.58      | 0.818      | 3.05       | 0.174    | 0.42   |
| 2-Hydroxybutyric acid       | 0.72      | 0.441      | 1.18       | 0.189    | 0.443  |
| 3-Hydroxybutyric acid       | 0.704     | 0.41       | 1.21       | 0.204    | 0.454  |
| Lactic acid                 | 0.739     | 0.463      | 1.18       | 0.206    | 0.454  |
| Nonanoic acid               | 1.45      | 0.792      | 2.66       | 0.228    | 0.49   |
| Serine                      | 0.738     | 0.445      | 1.22       | 0.237    | 0.494  |
| 4-Hydroxybutanoic acid      | 1.39      | 0.779      | 2.49       | 0.263    | 0.533  |
| Eicosapentaenoic acid       | 0.768     | 0.47       | 1.25       | 0.291    | 0.575  |
| Glycerol (1)                | 1.51      | 0.684      | 3.31       | 0.309    | 0.585  |
| Glycine                     | 1.34      | 0.758      | 2.38       | 0.312    | 0.585  |
| Decanoic acid               | 0.795     | 0.498      | 1.27       | 0.338    | 0.613  |
| Pyroglutamic acid           | 1.39      | 0.696      | 2.79       | 0.349    | 0.613  |
| Stearic acid                | 1.31      | 0.745      | 2.29       | 0.351    | 0.613  |
| 4-Deoxytetronic acid (2)    | 1.33      | 0.701      | 2.54       | 0.379    | 0.638  |
| Tridecanoic acid            | 1.35      | 0.687      | 2.66       | 0.383    | 0.638  |
| Glyceryl-glycoside          | 1.35      | 0.649      | 2.81       | 0.421    | 0.687  |
| Fumaric acid                | 1.25      | 0.71       | 2.19       | 0.444    | 0.708  |
| Arabinopyranose             | 1.3       | 0.618      | 2.72       | 0.493    | 0.744  |
| 11-Eicosenoic acid          | 1.26      | 0.649      | 2.45       | 0.494    | 0.744  |
| 1,3-Propanediol             | 1.24      | 0.649      | 2.38       | 0.512    | 0.744  |

| Name                       | exp(coef) | Lower 95 % | Upper 95 % | Pr(> z ) | p.adj |
|----------------------------|-----------|------------|------------|----------|-------|
| Nonadecanoic acid          | 1.28      | 0.604      | 2.73       | 0.515    | 0.744 |
| Docosahexaenoic acid       | 1.24      | 0.647      | 2.38       | 0.516    | 0.744 |
| Threonine                  | 0.864     | 0.547      | 1.37       | 0.531    | 0.744 |
| Bisphenol A                | 1.19      | 0.683      | 2.07       | 0.539    | 0.744 |
| 4-Hydroxyphenyllactic acid | 1.22      | 0.634      | 2.34       | 0.554    | 0.744 |
| Arachidic acid             | 1.17      | 0.697      | 1.95       | 0.556    | 0.744 |
| Aminomalonic acid          | 1.19      | 0.653      | 2.18       | 0.566    | 0.744 |
| Succinic acid              | 1.17      | 0.651      | 2.12       | 0.593    | 0.766 |
| Phenylalanine              | 0.884     | 0.522      | 1.5        | 0.648    | 0.823 |
| 3-Indolepropionic acid     | 0.91      | 0.574      | 1.44       | 0.69     | 0.863 |
| Arachidonic acid           | 1.12      | 0.623      | 2.01       | 0.707    | 0.869 |
| Hydroxyproline             | 1.11      | 0.624      | 1.98       | 0.721    | 0.872 |
| Ribitol (1)                | 1.09      | 0.625      | 1.89       | 0.765    | 0.909 |
| Palmitic acid              | 0.926     | 0.546      | 1.57       | 0.775    | 0.909 |
| Dodecanoic acid            | 0.934     | 0.516      | 1.69       | 0.82     | 0.934 |
| Heptadecanoic acid (1)     | 0.942     | 0.541      | 1.64       | 0.834    | 0.934 |
| Cholesterol                | 0.935     | 0.499      | 1.75       | 0.835    | 0.934 |
| 1-Monopalmitin             | 1.06      | 0.561      | 2.01       | 0.856    | 0.944 |
| alpha-Tocopherol           | 1.05      | 0.56       | 1.96       | 0.884    | 0.961 |
| Oleic acid                 | 0.965     | 0.544      | 1.71       | 0.903    | 0.968 |
| 2-Palmitoylglycerol        | 0.977     | 0.569      | 1.68       | 0.933    | 0.975 |
| Campesterol                | 1.02      | 0.561      | 1.85       | 0.952    | 0.975 |
| Heptadecanoic acid (2)     | 0.983     | 0.569      | 1.7        | 0.952    | 0.975 |
| Myristoleic acid           | 0.987     | 0.553      | 1.76       | 0.964    | 0.975 |
| 1-Dodecanol                | 1.01      | 0.569      | 1.79       | 0.975    | 0.975 |

### 4.2.2.3 Top-Metabolite

```
## Call:
## survival::coxph(formula = survival::Surv(time = Charcot.tdiff,
##     event = Charcot.from.DATE) ~ Ribonic_acid + Age.x + Gender.x +
##     Hba1c_baseline + CALSBP + bmi + Smoking + Statin + log_Blood_TGA +
##     Total_cholesterol, data = data.km)
##
## n= 596, number of events= 13
## (41 observations deleted due to missingness)
##
##           coef exp(coef) se(coef)      z Pr(>|z|)
## Ribonic_acid    1.159583  3.188605  0.354197  3.274  0.00106 **
## Age.x           0.005852  1.005870  0.026693  0.219  0.82645
## Gender.x        -0.080659  0.922508  0.573072 -0.141  0.88807
## Hba1c_baseline  -0.160816  0.851449  0.285865 -0.563  0.57373
## CALSBP          0.004624  1.004635  0.016462  0.281  0.77877
## bmi             0.040727  1.041568  0.070670  0.576  0.56441
## Smoking         -0.960873  0.382559  1.055937 -0.910  0.36284
## Statin          0.264468  1.302738  0.731946  0.361  0.71786
## log_Blood_TGA   0.543023  1.721203  0.463491  1.172  0.24136
## Total_cholesterol -0.126826  0.880887  0.343617 -0.369  0.71206
## ---
## Signif. codes:  0 '***' 0.001 '**' 0.01 '*' 0.05 '.' 0.1 ' ' 1
##
##           exp(coef) exp(-coef) lower .95 upper .95
## Ribonic_acid      3.1886    0.3136    1.59260    6.384
## Age.x              1.0059    0.9942    0.95460    1.060
## Gender.x           0.9225    1.0840    0.30003    2.836
## Hba1c_baseline     0.8514    1.1745    0.48622    1.491
## CALSBP             1.0046    0.9954    0.97274    1.038
## bmi                1.0416    0.9601    0.90685    1.196
## Smoking            0.3826    2.6140    0.04829    3.030
## Statin             1.3027    0.7676    0.31033    5.469
## log_Blood_TGA     1.7212    0.5810    0.69392    4.269
## Total_cholesterol  0.8809    1.1352    0.44919    1.727
##
## Concordance= 0.854 (se = 0.038 )
## Likelihood ratio test= 19.52 on 10 df, p=0.03
## Wald test              = 17.25 on 10 df, p=0.07
## Score (logrank) test = 16.92 on 10 df, p=0.08
```

#### 4.2.2.3.1 Forest Plot with Clinical Variables

- Top metabolite



### 4.2.3 Adjusted Model with eGFR

#### 4.2.3.1 Forest Plot of Model Coefficients

```
## NULL
```

#### 4.2.3.2 Table with All Metabolites

| Name                        | exp(coef) | Lower 95 % | Upper 95 % | Pr(> z ) | p.adj |
|-----------------------------|-----------|------------|------------|----------|-------|
| 3-Indoleacetic acid         | 0.482     | 0.26       | 0.891      | 0.02     | 0.499 |
| Tyrosine                    | 0.739     | 0.561      | 0.973      | 0.0313   | 0.499 |
| Tartronic acid              | 1.95      | 1.03       | 3.68       | 0.0394   | 0.499 |
| Ethanolamine                | 0.576     | 0.332      | 0.998      | 0.0491   | 0.499 |
| Hydroxylamine               | 1.99      | 0.98       | 4.05       | 0.057    | 0.499 |
| Pyruvic acid                | 0.624     | 0.384      | 1.02       | 0.0583   | 0.499 |
| Ribonic acid                | 2.11      | 0.937      | 4.74       | 0.0716   | 0.499 |
| Citric acid                 | 1.79      | 0.949      | 3.39       | 0.072    | 0.499 |
| Glyceric acid               | 1.83      | 0.941      | 3.57       | 0.0751   | 0.499 |
| Proline                     | 0.628     | 0.37       | 1.06       | 0.0842   | 0.499 |
| Malic acid                  | 1.72      | 0.913      | 3.24       | 0.0933   | 0.499 |
| Valine                      | 0.659     | 0.403      | 1.08       | 0.0972   | 0.499 |
| Linoleic acid               | 1.73      | 0.905      | 3.32       | 0.0973   | 0.499 |
| Alanine                     | 0.68      | 0.43       | 1.07       | 0.0981   | 0.499 |
| alpha-ketoglutaric acid     | 0.701     | 0.46       | 1.07       | 0.0997   | 0.499 |
| Stearic acid                | 1.56      | 0.891      | 2.75       | 0.12     | 0.537 |
| 2-hydroxy Isovaleric acid   | 0.657     | 0.386      | 1.12       | 0.122    | 0.537 |
| Benzeneacetic acid          | 1.74      | 0.847      | 3.56       | 0.132    | 0.549 |
| 3-Hydroxybutyric acid       | 0.669     | 0.383      | 1.17       | 0.156    | 0.615 |
| Octanoic acid               | 0.743     | 0.489      | 1.13       | 0.164    | 0.615 |
| Creatinine                  | 1.6       | 0.791      | 3.24       | 0.19     | 0.68  |
| Ribitol (2)                 | 1.61      | 0.775      | 3.34       | 0.202    | 0.682 |
| Decanoic acid               | 0.736     | 0.452      | 1.2        | 0.216    | 0.682 |
| L-5-Oxoproline              | 1.54      | 0.772      | 3.07       | 0.221    | 0.682 |
| Glycerol (2)                | 1.51      | 0.775      | 2.93       | 0.227    | 0.682 |
| Glutamic acid               | 0.737     | 0.435      | 1.25       | 0.256    | 0.739 |
| Glycerol (1)                | 1.54      | 0.711      | 3.32       | 0.274    | 0.762 |
| 4-Hydroxybutanoic acid      | 1.36      | 0.771      | 2.38       | 0.291    | 0.78  |
| Arabinopyranose             | 1.46      | 0.696      | 3.06       | 0.317    | 0.809 |
| Leucine                     | 0.862     | 0.64       | 1.16       | 0.326    | 0.809 |
| Methionine                  | 0.778     | 0.449      | 1.35       | 0.371    | 0.809 |
| Isoleucine                  | 0.854     | 0.604      | 1.21       | 0.373    | 0.809 |
| Lactic acid                 | 0.838     | 0.567      | 1.24       | 0.375    | 0.809 |
| Nonanoic acid               | 1.32      | 0.705      | 2.47       | 0.386    | 0.809 |
| Docosaheptaenoic acid       | 1.37      | 0.666      | 2.8        | 0.394    | 0.809 |
| Bisphenol A                 | 1.3       | 0.713      | 2.36       | 0.395    | 0.809 |
| Myo inositol                | 1.34      | 0.678      | 2.64       | 0.402    | 0.809 |
| Arachidic acid              | 1.23      | 0.739      | 2.05       | 0.424    | 0.809 |
| Arachidonic acid            | 1.29      | 0.687      | 2.42       | 0.429    | 0.809 |
| Nonadecanoic acid           | 1.33      | 0.636      | 2.8        | 0.445    | 0.809 |
| 2,4-Dihydroxybutanoic acid  | 1.31      | 0.647      | 2.66       | 0.45     | 0.809 |
| 1,3-Propanediol             | 1.3       | 0.655      | 2.58       | 0.453    | 0.809 |
| 4-Hydroxybenzeneacetic acid | 1.33      | 0.616      | 2.86       | 0.47     | 0.812 |
| Tridecanoic acid            | 1.25      | 0.674      | 2.33       | 0.476    | 0.812 |
| 3,4-Dihydroxybutanoic acid  | 1.28      | 0.633      | 2.58       | 0.492    | 0.814 |
| Serine                      | 0.84      | 0.506      | 1.39       | 0.499    | 0.814 |
| 11-Eicosenoic acid          | 1.23      | 0.649      | 2.35       | 0.521    | 0.831 |
| 4-Deoxytetronic acid (1)    | 1.23      | 0.62       | 2.45       | 0.549    | 0.858 |
| Eicosapentaenoic acid       | 0.852     | 0.483      | 1.5        | 0.581    | 0.89  |
| Phenylalanine               | 0.869     | 0.501      | 1.51       | 0.619    | 0.928 |



| Name                       | exp(coef) | Lower 95 % | Upper 95 % | Pr(> z ) | p.adj |
|----------------------------|-----------|------------|------------|----------|-------|
| Threonine                  | 0.9       | 0.568      | 1.43       | 0.653    | 0.958 |
| Aminomalonic acid          | 1.15      | 0.611      | 2.16       | 0.664    | 0.958 |
| Dodecanoic acid            | 0.887     | 0.48       | 1.64       | 0.7      | 0.964 |
| 4-Deoxytetronic acid (2)   | 0.894     | 0.49       | 1.63       | 0.717    | 0.964 |
| Hydroxyproline             | 0.896     | 0.492      | 1.63       | 0.72     | 0.964 |
| Succinic acid              | 1.12      | 0.591      | 2.12       | 0.732    | 0.964 |
| Fumaric acid               | 1.1       | 0.627      | 1.94       | 0.733    | 0.964 |
| Heptadecanoic acid (1)     | 0.919     | 0.537      | 1.57       | 0.757    | 0.978 |
| Glycine                    | 1.06      | 0.58       | 1.96       | 0.84     | 0.992 |
| 1-Monopalmitin             | 1.07      | 0.566      | 2.01       | 0.842    | 0.992 |
| Palmitic acid              | 1.06      | 0.59       | 1.91       | 0.843    | 0.992 |
| alpha-Tocopherol           | 1.06      | 0.581      | 1.93       | 0.849    | 0.992 |
| Pyroglutamic acid          | 1.06      | 0.544      | 2.07       | 0.862    | 0.992 |
| 2-Hydroxybutyric acid      | 0.958     | 0.568      | 1.61       | 0.871    | 0.992 |
| 2-Palmitoylglycerol        | 1.04      | 0.573      | 1.87       | 0.909    | 0.992 |
| 4-Hydroxyphenyllactic acid | 0.964     | 0.511      | 1.82       | 0.91     | 0.992 |
| 1-Dodecanol                | 1.03      | 0.571      | 1.86       | 0.921    | 0.992 |
| Myristoleic acid           | 1.02      | 0.616      | 1.7        | 0.928    | 0.992 |
| Cholesterol                | 1.02      | 0.555      | 1.88       | 0.944    | 0.992 |
| Oleic acid                 | 1.02      | 0.597      | 1.74       | 0.945    | 0.992 |
| Campesterol                | 0.985     | 0.544      | 1.78       | 0.96     | 0.992 |
| Heptadecanoic acid (2)     | 1.01      | 0.581      | 1.77       | 0.963    | 0.992 |
| Ribitol (1)                | 0.992     | 0.569      | 1.73       | 0.976    | 0.992 |
| 3-Indolepropionic acid     | 1.01      | 0.641      | 1.58       | 0.979    | 0.992 |
| Glyceryl-glycoside         | 1         | 0.515      | 1.94       | 0.999    | 0.999 |

### 4.2.3.3 Top-Metabolite from Adjusted Model

```
## Call:
## survival::coxph(formula = survival::Surv(time = Charcot.tdiff,
##     event = Charcot.from.DATE) ~ Ribonic_acid + Age.x + Gender.x +
##     Hba1c_baseline + CALSBP + bmi + Smoking + Statin + log_Blood_TGA +
##     Total_cholesterol + egfr, data = data.km)
##
## n= 594, number of events= 13
## (43 observations deleted due to missingness)
##
##           coef exp(coef)  se(coef)      z Pr(>|z|)
## Ribonic_acid    0.757418  2.132763  0.420427  1.802  0.0716 .
## Age.x           0.003861  1.003869  0.027314  0.141  0.8876
## Gender.x        0.023550  1.023829  0.572240  0.041  0.9672
## Hba1c_baseline -0.151465  0.859448  0.285140 -0.531  0.5953
## CALSBP          0.002568  1.002571  0.016434  0.156  0.8758
## bmi             0.047709  1.048865  0.071347  0.669  0.5037
## Smoking         -0.821791  0.439644  1.069596 -0.768  0.4423
## Statin          0.120647  1.128227  0.737486  0.164  0.8701
## log_Blood_TGA   0.470718  1.601143  0.469502  1.003  0.3161
## Total_cholesterol -0.128937  0.879029  0.330540 -0.390  0.6965
## egfr            -0.020804  0.979411  0.013434 -1.549  0.1215
## ---
## Signif. codes:  0 '***' 0.001 '**' 0.01 '*' 0.05 '.' 0.1 ' ' 1
##
##           exp(coef) exp(-coef) lower .95 upper .95
## Ribonic_acid      2.1328    0.4689    0.93557    4.862
## Age.x              1.0039    0.9961    0.95154    1.059
## Gender.x           1.0238    0.9767    0.33353    3.143
## Hba1c_baseline     0.8594    1.1635    0.49148    1.503
## CALSBP             1.0026    0.9974    0.97079    1.035
## bmi                1.0489    0.9534    0.91199    1.206
## Smoking            0.4396    2.2746    0.05403    3.577
## Statin             1.1282    0.8863    0.26586    4.788
## log_Blood_TGA     1.6011    0.6246    0.63795    4.019
## Total_cholesterol  0.8790    1.1376    0.45988    1.680
## egfr              0.9794    1.0210    0.95396    1.006
##
## Concordance= 0.873 (se = 0.027 )
## Likelihood ratio test= 21.97 on 11 df, p=0.02
## Wald test              = 18.89 on 11 df, p=0.06
## Score (logrank) test = 22.45 on 11 df, p=0.02
```

#### 4.2.3.3.1 Forest Plot with Clinical Variables

- Top metabolite from adjusted model



#### 4.2.4 Fully Adjusted Model

#### 4.2.4.1 Forest Plot of Model Coefficients

## NULL

#### 4.2.4.2 Table with All Metabolites

| Name                        | exp(coef) | Lower 95 % | Upper 95 % | Pr(> z ) | p.adj |
|-----------------------------|-----------|------------|------------|----------|-------|
| Proline                     | 0.475     | 0.271      | 0.832      | 0.00933  | 0.583 |
| Tyrosine                    | 0.701     | 0.523      | 0.938      | 0.0169   | 0.583 |
| Ethanolamine                | 0.509     | 0.276      | 0.941      | 0.0313   | 0.583 |
| Glyceric acid               | 2.26      | 1.04       | 4.92       | 0.0402   | 0.583 |
| Alanine                     | 0.626     | 0.394      | 0.996      | 0.0483   | 0.583 |
| Citric acid                 | 1.9       | 0.996      | 3.63       | 0.0513   | 0.583 |
| 3-Indoleacetic acid         | 0.528     | 0.276      | 1.01       | 0.0544   | 0.583 |
| Stearic acid                | 1.76      | 0.954      | 3.24       | 0.0705   | 0.622 |
| Tartronic acid              | 1.81      | 0.93       | 3.53       | 0.0806   | 0.622 |
| Ribitol (2)                 | 2.08      | 0.909      | 4.78       | 0.083    | 0.622 |
| Hydroxylamine               | 1.89      | 0.879      | 4.09       | 0.103    | 0.65  |
| Glutamic acid               | 0.615     | 0.343      | 1.11       | 0.104    | 0.65  |
| Benzeneacetic acid          | 1.82      | 0.849      | 3.92       | 0.124    | 0.667 |
| Leucine                     | 0.749     | 0.519      | 1.08       | 0.125    | 0.667 |
| 3-Hydroxybutyric acid       | 0.625     | 0.332      | 1.18       | 0.145    | 0.678 |
| Valine                      | 0.687     | 0.415      | 1.14       | 0.145    | 0.678 |
| Ribonic acid                | 1.9       | 0.776      | 4.65       | 0.16     | 0.678 |
| 4-Hydroxybenzeneacetic acid | 1.82      | 0.786      | 4.2        | 0.163    | 0.678 |
| Decanoic acid               | 0.697     | 0.395      | 1.23       | 0.212    | 0.699 |
| Arachidonic acid            | 1.51      | 0.765      | 2.97       | 0.235    | 0.699 |
| L-5-Oxoproline              | 1.58      | 0.737      | 3.41       | 0.239    | 0.699 |
| Nonadecanoic acid           | 1.66      | 0.672      | 4.11       | 0.272    | 0.699 |
| 2-hydroxy Isovaleric acid   | 0.72      | 0.4        | 1.29       | 0.272    | 0.699 |
| Pyruvic acid                | 0.752     | 0.446      | 1.27       | 0.285    | 0.699 |
| 2,4-Dihydroxybutanoic acid  | 1.5       | 0.711      | 3.16       | 0.287    | 0.699 |
| Docosahexaenoic acid        | 1.57      | 0.673      | 3.65       | 0.297    | 0.699 |
| Octanoic acid               | 0.796     | 0.517      | 1.23       | 0.3      | 0.699 |
| Malic acid                  | 1.41      | 0.736      | 2.69       | 0.302    | 0.699 |
| Glycerol (1)                | 1.61      | 0.651      | 3.99       | 0.302    | 0.699 |
| Isoleucine                  | 0.791     | 0.503      | 1.24       | 0.31     | 0.699 |
| Linoleic acid               | 1.4       | 0.729      | 2.69       | 0.313    | 0.699 |
| Lactic acid                 | 0.824     | 0.564      | 1.2        | 0.318    | 0.699 |
| 4-Hydroxybutanoic acid      | 1.39      | 0.711      | 2.7        | 0.338    | 0.699 |
| Myo inositol                | 1.43      | 0.689      | 2.95       | 0.339    | 0.699 |
| Threonine                   | 0.796     | 0.491      | 1.29       | 0.356    | 0.699 |
| Nonanoic acid               | 1.38      | 0.693      | 2.77       | 0.357    | 0.699 |
| Heptadecanoic acid (1)      | 0.767     | 0.428      | 1.37       | 0.373    | 0.699 |
| Serine                      | 0.793     | 0.47       | 1.34       | 0.385    | 0.699 |
| Glycerol (2)                | 1.37      | 0.67       | 2.8        | 0.389    | 0.699 |
| Tridecanoic acid            | 1.32      | 0.698      | 2.51       | 0.39     | 0.699 |
| Creatinine                  | 1.37      | 0.669      | 2.79       | 0.391    | 0.699 |
| Arabinopyranose             | 1.41      | 0.644      | 3.08       | 0.391    | 0.699 |
| 11-Eicosenoic acid          | 1.3       | 0.647      | 2.61       | 0.462    | 0.805 |
| alpha-ketoglutaric acid     | 0.813     | 0.448      | 1.48       | 0.497    | 0.832 |
| 3-Indolepropionic acid      | 1.19      | 0.717      | 1.98       | 0.499    | 0.832 |
| Aminomalonic acid           | 1.26      | 0.617      | 2.57       | 0.527    | 0.85  |
| 3,4-Dihydroxybutanoic acid  | 1.29      | 0.578      | 2.86       | 0.538    | 0.85  |
| Pyroglutamic acid           | 1.26      | 0.587      | 2.71       | 0.552    | 0.85  |
| 1,3-Propanediol             | 1.26      | 0.582      | 2.74       | 0.555    | 0.85  |
| Dodecanoic acid             | 0.832     | 0.434      | 1.59       | 0.578    | 0.867 |

| Name                       | exp(coef) | Lower 95 % | Upper 95 % | Pr(> z ) | p.adj |
|----------------------------|-----------|------------|------------|----------|-------|
| Methionine                 | 0.851     | 0.451      | 1.61       | 0.62     | 0.911 |
| 4-Deoxytetronic acid (2)   | 0.86      | 0.453      | 1.63       | 0.646    | 0.931 |
| Campesterol                | 1.16      | 0.602      | 2.23       | 0.659    | 0.932 |
| 4-Deoxytetronic acid (1)   | 1.18      | 0.539      | 2.58       | 0.679    | 0.943 |
| Eicosapentaenoic acid      | 0.893     | 0.474      | 1.68       | 0.726    | 0.97  |
| Fumaric acid               | 1.1       | 0.603      | 1.99       | 0.763    | 0.97  |
| 2-Hydroxybutyric acid      | 0.921     | 0.523      | 1.62       | 0.776    | 0.97  |
| Palmitic acid              | 1.08      | 0.588      | 1.97       | 0.809    | 0.97  |
| Cholesterol                | 0.93      | 0.497      | 1.74       | 0.82     | 0.97  |
| Hydroxyproline             | 1.07      | 0.558      | 2.05       | 0.839    | 0.97  |
| Phenylalanine              | 1.07      | 0.552      | 2.08       | 0.84     | 0.97  |
| 1-Dodecanol                | 1.06      | 0.56       | 2.03       | 0.849    | 0.97  |
| Bisphenol A                | 1.06      | 0.576      | 1.94       | 0.858    | 0.97  |
| Glycine                    | 1.06      | 0.546      | 2.06       | 0.861    | 0.97  |
| Arachidic acid             | 1.05      | 0.585      | 1.9        | 0.862    | 0.97  |
| 4-Hydroxyphenyllactic acid | 0.938     | 0.458      | 1.92       | 0.862    | 0.97  |
| Succinic acid              | 0.945     | 0.488      | 1.83       | 0.867    | 0.97  |
| Glycerol-glycoside         | 0.956     | 0.474      | 1.93       | 0.9      | 0.977 |
| Oleic acid                 | 1.04      | 0.6        | 1.78       | 0.901    | 0.977 |
| Heptadecanoic acid (2)     | 1.03      | 0.579      | 1.82       | 0.925    | 0.977 |
| Ribitol (1)                | 1.03      | 0.569      | 1.85       | 0.934    | 0.977 |
| 1-Monopalmitin             | 0.969     | 0.438      | 2.15       | 0.938    | 0.977 |
| Myristoleic acid           | 1.01      | 0.608      | 1.69       | 0.957    | 0.982 |
| 2-Palmitoylglycerol        | 1.01      | 0.53       | 1.93       | 0.972    | 0.982 |
| alpha-Tocopherol           | 1.01      | 0.555      | 1.83       | 0.982    | 0.982 |

#### 4.2.4.3 Top-Metabolite from Adjusted Model

```
## Call:
## survival::coxph(formula = survival::Surv(time = Charcot.tdiff,
##     event = Charcot.from.DATE) ~ Ribonic_acid + Age.x + Gender.x +
##     Hba1c_baseline + CALSBP + bmi + Smoking + Statin + log_Blood_TGA +
##     Total_cholesterol + egfr + logUAER, data = data.km)
##
## n= 561, number of events= 12
## (76 observations deleted due to missingness)
##
##           coef exp(coef) se(coef)      z Pr(>|z|)
## Ribonic_acid    0.652055  1.919482  0.464544  1.404  0.1604
## Age.x           0.031762  1.032272  0.031573  1.006  0.3144
## Gender.x        -0.718644  0.487413  0.670599 -1.072  0.2839
## Hba1c_baseline  -0.270277  0.763168  0.302165 -0.894  0.3711
## CALSBP          -0.007227  0.992799  0.018765 -0.385  0.7001
## bmi             0.029357  1.029793  0.074984  0.392  0.6954
## Smoking         -1.451550  0.234207  1.125927 -1.289  0.1973
## Statin          -0.459668  0.631493  0.774852 -0.593  0.5530
## log_Blood_TGA   0.729517  2.074079  0.461130  1.582  0.1136
## Total_cholesterol -0.264300  0.767743  0.341581 -0.774  0.4391
## egfr            -0.010075  0.989975  0.014653 -0.688  0.4917
## logUAER         0.350711  1.420077  0.158507  2.213  0.0269 *
## ---
## Signif. codes:  0 '***' 0.001 '**' 0.01 '*' 0.05 '.' 0.1 ' ' 1
##
##           exp(coef) exp(-coef) lower .95 upper .95
## Ribonic_acid      1.9195    0.5210    0.77226    4.771
## Age.x              1.0323    0.9687    0.97033    1.098
## Gender.x           0.4874    2.0516    0.13094    1.814
## Hba1c_baseline     0.7632    1.3103    0.42210    1.380
## CALSBP             0.9928    1.0073    0.95695    1.030
## bmi                1.0298    0.9711    0.88904    1.193
## Smoking            0.2342    4.2697    0.02578    2.128
## Statin             0.6315    1.5835    0.13830    2.884
## log_Blood_TGA     2.0741    0.4821    0.84006    5.121
## Total_cholesterol  0.7677    1.3025    0.39306    1.500
## egfr              0.9900    1.0101    0.96195    1.019
## logUAER           1.4201    0.7042    1.04086    1.937
##
## Concordance= 0.873 (se = 0.051 )
## Likelihood ratio test= 26.37 on 12 df,  p=0.01
## Wald test              = 22.11 on 12 df,  p=0.04
## Score (logrank) test = 28.74 on 12 df,  p=0.004
```



#### 4.2.4.3.1 Forest Plot with Clinical Variables

- Top metabolite from adjusted model



## 5 Amputation

### 5.1 Amputation at DATE

#### 5.1.1 Crude Model

```
## [1] "Fitting models:"  
## [1] "~ Amputation.at.DATE"  
## [1] ""
```

### 5.1.1.1 Forest Plot of Model Coefficients

## Warning: Ignoring unknown aesthetics: x



### 5.1.1.2 Tables of Model Coefficients

```
## [1] ""
## [1] "Table: Amputation.at.DATEJA"
## [1] " (from model: "
## [1] " ~ Amputation.at.DATE)"
## [1] ""
##
##           Name Coefficient   CI.L   CI.R  p.value  p.adj
## 1           Ribonic acid; 72    0.864  0.4480  1.2800  4.65e-05  0.00349
## 2           Myo inositol 6TMS; 1  0.755  0.3390  1.1700  3.72e-04  0.01390
## 3 4-Hydroxybenzeneacetic acid; 4  0.695  0.2790  1.1100  1.06e-03  0.02650
## 4           Ribitol; 71         0.667  0.2510  1.0800  1.66e-03  0.03120
## 5           Threonine, 3TMS; 12  -0.627 -1.0400 -0.2110  3.15e-03  0.03960
## 6           Succinic acid, 2TMS; 7  0.626  0.2100  1.0400  3.16e-03  0.03960
## 7 2,4-Dihydroxybutanoic acid; 28  0.574  0.1580  0.9890  6.86e-03  0.07280
## 8           Creatinine; 50        0.565  0.1490  0.9810  7.76e-03  0.07280
## 9 3,4-Dihydroxybutanoic acid; 27  0.516  0.1000  0.9320  1.50e-02  0.11200
## 10 4-Hydroxyphenyllactic acid; 44  0.506  0.0906  0.9220  1.70e-02  0.11200
## 11          Pyroglutamic acid; 69  0.500  0.0842  0.9160  1.84e-02  0.11200
## 12          Malic acid, 3TMS; 11    0.497  0.0810  0.9130  1.92e-02  0.11200
## 13          Glycerol; 57           0.492  0.0765  0.9080  2.03e-02  0.11200
## 14 4-Deoxytetronic acid; 33        0.490  0.0744  0.9060  2.09e-02  0.11200
## 15 3-Indolepropionic acid; 41     -0.435 -0.8500 -0.0189  4.05e-02  0.19300
## 16          Serine, 3TMS; 14       -0.430 -0.8460 -0.0143  4.26e-02  0.19300
## 17          Hydroxyproline; 64      0.428  0.0121  0.8440  4.37e-02  0.19300
```

### 5.1.1.3 Table with All Metabolites

```
## [1] ""
## [1] "Table: Amputation.at.DATEJA"
## [1] " (from model: "
## [1] " ~ Amputation.at.DATE)"
## [1] ""
```

| ##    | Name                           | Coefficient | CI.L    | CI.R    | p.value  | p.adj   |
|-------|--------------------------------|-------------|---------|---------|----------|---------|
| ## 1  | Ribonic acid; 72               | 0.86400     | 0.4480  | 1.2800  | 4.65e-05 | 0.00349 |
| ## 2  | Myo inositol 6TMS; 1           | 0.75500     | 0.3390  | 1.1700  | 3.72e-04 | 0.01390 |
| ## 3  | 4-Hydroxybenzeneacetic acid; 4 | 0.69500     | 0.2790  | 1.1100  | 1.06e-03 | 0.02650 |
| ## 4  | Ribitol; 71                    | 0.66700     | 0.2510  | 1.0800  | 1.66e-03 | 0.03120 |
| ## 5  | Threonine, 3TMS; 12            | -0.62700    | -1.0400 | -0.2110 | 3.15e-03 | 0.03960 |
| ## 6  | Succinic acid, 2TMS; 7         | 0.62600     | 0.2100  | 1.0400  | 3.16e-03 | 0.03960 |
| ## 7  | 2,4-Dihydroxybutanoic acid; 28 | 0.57400     | 0.1580  | 0.9890  | 6.86e-03 | 0.07280 |
| ## 8  | Creatinine; 50                 | 0.56500     | 0.1490  | 0.9810  | 7.76e-03 | 0.07280 |
| ## 9  | 3,4-Dihydroxybutanoic acid; 27 | 0.51600     | 0.1000  | 0.9320  | 1.50e-02 | 0.11200 |
| ## 10 | 4-Hydroxyphenyllactic acid; 44 | 0.50600     | 0.0906  | 0.9220  | 1.70e-02 | 0.11200 |
| ## 11 | Pyroglutamic acid; 69          | 0.50000     | 0.0842  | 0.9160  | 1.84e-02 | 0.11200 |
| ## 12 | Malic acid, 3TMS; 11           | 0.49700     | 0.0810  | 0.9130  | 1.92e-02 | 0.11200 |
| ## 13 | Glycerol; 57                   | 0.49200     | 0.0765  | 0.9080  | 2.03e-02 | 0.11200 |
| ## 14 | 4-Deoxytetronic acid; 33       | 0.49000     | 0.0744  | 0.9060  | 2.09e-02 | 0.11200 |
| ## 15 | 3-Indolepropionic acid; 41     | -0.43500    | -0.8500 | -0.0189 | 4.05e-02 | 0.19300 |
| ## 16 | Serine, 3TMS; 14               | -0.43000    | -0.8460 | -0.0143 | 4.26e-02 | 0.19300 |
| ## 17 | Hydroxyproline; 64             | 0.42800     | 0.0121  | 0.8440  | 4.37e-02 | 0.19300 |
| ## 18 | 3-Indoleacetic acid; 40        | 0.37700     | -0.0384 | 0.7930  | 7.53e-02 | 0.31400 |
| ## 19 | Tyrosine; 75                   | -0.36900    | -0.7850 | 0.0470  | 8.21e-02 | 0.31700 |
| ## 20 | Valine, 2TMS; 20               | -0.36600    | -0.7820 | 0.0500  | 8.46e-02 | 0.31700 |
| ## 21 | Methionine, 2TMS; 16           | -0.35900    | -0.7750 | 0.0564  | 9.03e-02 | 0.32200 |
| ## 22 | Leucine, 2TMS; 19              | -0.35300    | -0.7690 | 0.0629  | 9.63e-02 | 0.32800 |
| ## 23 | Glyceryl-glycoside; 59         | 0.34400     | -0.0715 | 0.7600  | 1.05e-01 | 0.34100 |
| ## 24 | 4-Deoxytetronic acid; 32       | 0.33900     | -0.0765 | 0.7550  | 1.10e-01 | 0.34300 |
| ## 25 | Heptadecanoic acid; 61         | 0.32900     | -0.0871 | 0.7440  | 1.21e-01 | 0.36400 |
| ## 26 | Phenylalanine, 2TMS; 13        | -0.30400    | -0.7190 | 0.1120  | 1.52e-01 | 0.42500 |
| ## 27 | Glutamic acid, 3TMS; 8         | -0.30300    | -0.7190 | 0.1130  | 1.53e-01 | 0.42500 |
| ## 28 | 4-Hydroxybutanoic acid; 43     | 0.28900     | -0.1270 | 0.7040  | 1.74e-01 | 0.46500 |
| ## 29 | Ribitol; 70                    | 0.26200     | -0.1540 | 0.6780  | 2.17e-01 | 0.56200 |
| ## 30 | Myristoleic acid; 65           | 0.24500     | -0.1700 | 0.6610  | 2.47e-01 | 0.61800 |
| ## 31 | Campesterol; 49                | -0.23600    | -0.6520 | 0.1790  | 2.65e-01 | 0.62300 |
| ## 32 | Alanine, 2TMS; 25              | 0.23100     | -0.1850 | 0.6470  | 2.76e-01 | 0.62300 |
| ## 33 | Stearic acid, TMS; 2           | 0.23000     | -0.1860 | 0.6450  | 2.79e-01 | 0.62300 |
| ## 34 | Heptadecanoic acid; 60         | 0.22800     | -0.1880 | 0.6440  | 2.83e-01 | 0.62300 |
| ## 35 | Citric acid, 4TMS; 6           | 0.22100     | -0.1950 | 0.6370  | 2.98e-01 | 0.62600 |
| ## 36 | Dodecanoic acid; 54            | 0.21900     | -0.1970 | 0.6340  | 3.03e-01 | 0.62600 |
| ## 37 | 2-Palmitoylglycerol; 39        | -0.21600    | -0.6320 | 0.2000  | 3.09e-01 | 0.62600 |
| ## 38 | Cholesterol, TMS; 23           | -0.19500    | -0.6110 | 0.2200  | 3.57e-01 | 0.68900 |
| ## 39 | Fumaric acid, 2TMS; 9          | 0.19400     | -0.2220 | 0.6090  | 3.62e-01 | 0.68900 |
| ## 40 | 2-hydroxy Isovaleric acid; 38  | -0.18600    | -0.6020 | 0.2290  | 3.80e-01 | 0.68900 |
| ## 41 | Aminomalonic acid; 45          | -0.18500    | -0.6000 | 0.2310  | 3.84e-01 | 0.68900 |
| ## 42 | Pyruvic acid; 31               | 0.18200     | -0.2340 | 0.5980  | 3.91e-01 | 0.68900 |
| ## 43 | 11-Eicosenoic acid; 35         | 0.18100     | -0.2350 | 0.5960  | 3.95e-01 | 0.68900 |
| ## 44 | Hydroxylamine; 62              | 0.15600     | -0.2600 | 0.5720  | 4.62e-01 | 0.78300 |
| ## 45 | Eicosapentaenoic acid; 55      | -0.15300    | -0.5690 | 0.2630  | 4.70e-01 | 0.78300 |
| ## 46 | Benzeneacetic acid; 47         | 0.14600     | -0.2700 | 0.5620  | 4.92e-01 | 0.79700 |

|       |                                |          |         |        |          |         |
|-------|--------------------------------|----------|---------|--------|----------|---------|
| ## 47 | Proline, 2TMS; 21              | -0.14300 | -0.5590 | 0.2730 | 5.00e-01 | 0.79700 |
| ## 48 | alpha-Tocopherol; 26           | -0.13600 | -0.5510 | 0.2800 | 5.23e-01 | 0.80800 |
| ## 49 | 1-Monopalmitin; 37             | 0.13300  | -0.2830 | 0.5480 | 5.32e-01 | 0.80800 |
| ## 50 | Decanoic acid; 52              | 0.13100  | -0.2850 | 0.5460 | 5.38e-01 | 0.80800 |
| ## 51 | 2-Hydroxybutyric acid, 2TMS; 2 | 0.12500  | -0.2910 | 0.5410 | 5.56e-01 | 0.81700 |
| ## 52 | Palmitic acid, TMS; 5          | 0.12100  | -0.2950 | 0.5370 | 5.68e-01 | 0.81900 |
| ## 53 | Tridecanoic acid; 74           | 0.11700  | -0.2990 | 0.5320 | 5.83e-01 | 0.82500 |
| ## 54 | Arachidonic acid, TMS; 24      | 0.11000  | -0.3060 | 0.5260 | 6.04e-01 | 0.83700 |
| ## 55 | Isoleucine, 2TMS; 18           | -0.10700 | -0.5230 | 0.3090 | 6.14e-01 | 0.83700 |
| ## 56 | Ethanolamine; 56               | 0.09870  | -0.3170 | 0.5150 | 6.42e-01 | 0.83700 |
| ## 57 | Arabinopyranose; 51            | -0.09410 | -0.5100 | 0.3220 | 6.57e-01 | 0.83700 |
| ## 58 | Lactic acid; 29                | 0.09380  | -0.3220 | 0.5100 | 6.58e-01 | 0.83700 |
| ## 59 | Nonadecanoic acid; 66          | 0.09020  | -0.3260 | 0.5060 | 6.71e-01 | 0.83700 |
| ## 60 | Glyceric acid; 30              | -0.08710 | -0.5030 | 0.3290 | 6.81e-01 | 0.83700 |
| ## 61 | 1-Dodecanol; 36                | 0.08220  | -0.3340 | 0.4980 | 6.98e-01 | 0.83700 |
| ## 62 | alpha-ketoglutaric acid, TMS M | 0.08110  | -0.3350 | 0.4970 | 7.02e-01 | 0.83700 |
| ## 63 | Linoleic acid, TMS; 4          | -0.08100 | -0.4970 | 0.3350 | 7.03e-01 | 0.83700 |
| ## 64 | Arachidic acid; 46             | 0.07690  | -0.3390 | 0.4930 | 7.17e-01 | 0.84000 |
| ## 65 | 3-Hydroxybutyric acid, 2TMS; 1 | 0.06500  | -0.3510 | 0.4810 | 7.59e-01 | 0.85600 |
| ## 66 | 1,3-Propanediol; 34            | 0.06460  | -0.3510 | 0.4800 | 7.61e-01 | 0.85600 |
| ## 67 | Tartronic acid; 73             | -0.06350 | -0.4790 | 0.3520 | 7.65e-01 | 0.85600 |
| ## 68 | Octanoic acid; 68              | 0.05990  | -0.3560 | 0.4760 | 7.78e-01 | 0.85800 |
| ## 69 | Glycerol; 58                   | 0.04750  | -0.3680 | 0.4630 | 8.23e-01 | 0.89400 |
| ## 70 | Bisphenol A; 48                | -0.04260 | -0.4580 | 0.3730 | 8.41e-01 | 0.90100 |
| ## 71 | L-5-Oxoproline; 63             | -0.03410 | -0.4500 | 0.3820 | 8.72e-01 | 0.92200 |
| ## 72 | Glycine, 3TMS; 17              | 0.01970  | -0.3960 | 0.4360 | 9.26e-01 | 0.96400 |
| ## 73 | Nonanoic acid; 67              | -0.01080 | -0.4270 | 0.4050 | 9.59e-01 | 0.97500 |
| ## 74 | Oleic acid, TMS; 3             | 0.01010  | -0.4060 | 0.4260 | 9.62e-01 | 0.97500 |
| ## 75 | Docosaehaenoic acid; 53        | 0.00511  | -0.4110 | 0.4210 | 9.81e-01 | 0.98100 |

### 5.1.2 Adjusted Model

```
## [1] "Fitting models:"  
## [1] "~ Amputation.at.DATE + Age.x + Gender.x + Hba1c_baseline + CALSBP + bmi + Smoking + Statin + lo  
## [1] ""
```

### 5.1.2.1 Forest Plot of Model Coefficients

```
## Warning: Ignoring unknown aesthetics: x
## Ignoring unknown aesthetics: x
```





### 5.1.2.2 Tables of Model Coefficients

```

## [1] ""
## [1] "Table: Amputation.at.DATEJA"
## [1] " (from model: "
## [1] " ~ Amputation.at.DATE + Age.x + Gender.x + Hba1c_baseline"
## [1] " + CALSBP + bmi + Smoking + Statin + log_Blood_TGA +"
## [1] " Total_cholesterol)"
## [1] ""
##
## Name Coefficient CI.L CI.R p.value p.adj
## 1 Ribonic acid; 72 0.725 0.304 1.150 0.00073 0.0547
## 2 Myo inositol 6TMS; 1 0.613 0.193 1.030 0.00427 0.1600
## 3 Succinic acid, 2TMS; 7 0.579 0.158 0.999 0.00702 0.1760
## [1] ""
## [1] "Table: Age.x"
## [1] " (from model: "
## [1] " ~ Amputation.at.DATE + Age.x + Gender.x + Hba1c_baseline"
## [1] " + CALSBP + bmi + Smoking + Statin + log_Blood_TGA +"
## [1] " Total_cholesterol)"
## [1] ""
##
## Name Coefficient CI.L CI.R p.value
## 1 Eicosapentaenoic acid; 55 0.02240 1.57e-02 2.91e-02 5.20e-11
## 2 2,4-Dihydroxybutanoic acid; 28 0.01680 1.01e-02 2.35e-02 8.61e-07
## 3 4-Hydroxybenzeneacetic acid; 4 0.01630 9.57e-03 2.30e-02 1.90e-06
## 4 Myo inositol 6TMS; 1 0.01450 7.80e-03 2.12e-02 2.21e-05
## 5 Ribitol; 71 0.01410 7.41e-03 2.08e-02 3.66e-05
## 6 Docosahexaenoic acid; 53 0.01350 6.77e-03 2.02e-02 8.08e-05
## 7 3-Indoleacetic acid; 40 0.01330 6.58e-03 2.00e-02 1.01e-04
## 8 Aminomalonic acid; 45 0.01150 4.80e-03 1.82e-02 7.61e-04
## 9 Ribonic acid; 72 0.01130 4.63e-03 1.80e-02 9.11e-04
## 10 alpha-ketoglutaric acid, TMS M 0.01100 4.29e-03 1.77e-02 1.29e-03
## 11 Ribitol; 70 0.01060 3.87e-03 1.73e-02 1.98e-03
## 12 Malic acid, 3TMS; 11 0.01030 3.57e-03 1.70e-02 2.65e-03
## 13 Pyruvic acid; 31 0.01020 3.52e-03 1.69e-02 2.77e-03
## 14 Fumaric acid, 2TMS; 9 0.01010 3.45e-03 1.68e-02 2.97e-03
## 15 3,4-Dihydroxybutanoic acid; 27 0.01010 3.43e-03 1.68e-02 3.04e-03
## 16 Citric acid, 4TMS; 6 0.01010 3.41e-03 1.68e-02 3.10e-03
## 17 alpha-Tocopherol; 26 0.01010 3.40e-03 1.68e-02 3.13e-03
## 18 Decanoic acid; 52 0.01010 3.36e-03 1.67e-02 3.23e-03
## 19 Glyceric acid; 30 0.00983 3.14e-03 1.65e-02 4.00e-03
## 20 4-Hydroxyphenyllactic acid; 44 0.00964 2.95e-03 1.63e-02 4.76e-03
## 21 Glycine, 3TMS; 17 0.00932 2.63e-03 1.60e-02 6.35e-03
## 22 Succinic acid, 2TMS; 7 0.00888 2.19e-03 1.56e-02 9.30e-03
## 23 11-Eicosenoic acid; 35 0.00849 1.80e-03 1.52e-02 1.29e-02
## 24 Pyroglutamic acid; 69 0.00840 1.70e-03 1.51e-02 1.39e-02
## 25 Alanine, 2TMS; 25 0.00831 1.61e-03 1.50e-02 1.50e-02
## 26 Creatinine; 50 0.00751 8.18e-04 1.42e-02 2.78e-02
## 27 Phenylalanine, 2TMS; 13 0.00737 6.78e-04 1.41e-02 3.09e-02
## 28 Valine, 2TMS; 20 -0.00733 -1.40e-02 -6.36e-04 3.19e-02
## 29 Leucine, 2TMS; 19 -0.00726 -1.40e-02 -5.68e-04 3.35e-02
## 30 Myristoleic acid; 65 0.00706 3.68e-04 1.38e-02 3.87e-02
## 31 Heptadecanoic acid; 61 0.00688 1.90e-04 1.36e-02 4.38e-02
## 32 Glutamic acid, 3TMS; 8 0.00688 1.86e-04 1.36e-02 4.40e-02
## 33 Dodecanoic acid; 54 0.00687 1.81e-04 1.36e-02 4.41e-02

```

|       |                        |          |           |           |          |
|-------|------------------------|----------|-----------|-----------|----------|
| ## 34 | Isoleucine, 2TMS; 18   | -0.00676 | -1.34e-02 | -6.36e-05 | 4.79e-02 |
| ## 35 | Tartronic acid; 73     | 0.00668  | -9.95e-06 | 1.34e-02  | 5.03e-02 |
| ## 36 | Oleic acid, TMS; 3     | 0.00647  | -2.25e-04 | 1.32e-02  | 5.82e-02 |
| ## 37 | Benzeneacetic acid; 47 | 0.00640  | -2.90e-04 | 1.31e-02  | 6.08e-02 |
| ## 38 | Hydroxylamine; 62      | -0.00626 | -1.30e-02 | 4.32e-04  | 6.67e-02 |
| ## 39 | 1-Dodecanol; 36        | -0.00621 | -1.29e-02 | 4.85e-04  | 6.91e-02 |
| ## 40 | Nonadecanoic acid; 66  | 0.00608  | -6.10e-04 | 1.28e-02  | 7.49e-02 |
| ## 41 | Tyrosine; 75           | 0.00606  | -6.32e-04 | 1.28e-02  | 7.59e-02 |
| ## 42 | Heptadecanoic acid; 60 | 0.00590  | -7.93e-04 | 1.26e-02  | 8.41e-02 |
| ## 43 | Palmitic acid, TMS; 5  | 0.00585  | -8.45e-04 | 1.25e-02  | 8.68e-02 |
| ## 44 | L-5-Oxoproline; 63     | 0.00578  | -9.14e-04 | 1.25e-02  | 9.06e-02 |
| ##    | p.adj                  |          |           |           |          |
| ## 1  |                        | 3.90e-09 |           |           |          |
| ## 2  |                        | 3.23e-05 |           |           |          |
| ## 3  |                        | 4.76e-05 |           |           |          |
| ## 4  |                        | 4.14e-04 |           |           |          |
| ## 5  |                        | 5.48e-04 |           |           |          |
| ## 6  |                        | 1.01e-03 |           |           |          |
| ## 7  |                        | 1.08e-03 |           |           |          |
| ## 8  |                        | 7.14e-03 |           |           |          |
| ## 9  |                        | 7.60e-03 |           |           |          |
| ## 10 |                        | 9.70e-03 |           |           |          |
| ## 11 |                        | 1.35e-02 |           |           |          |
| ## 12 |                        | 1.35e-02 |           |           |          |
| ## 13 |                        | 1.35e-02 |           |           |          |
| ## 14 |                        | 1.35e-02 |           |           |          |
| ## 15 |                        | 1.35e-02 |           |           |          |
| ## 16 |                        | 1.35e-02 |           |           |          |
| ## 17 |                        | 1.35e-02 |           |           |          |
| ## 18 |                        | 1.35e-02 |           |           |          |
| ## 19 |                        | 1.58e-02 |           |           |          |
| ## 20 |                        | 1.79e-02 |           |           |          |
| ## 21 |                        | 2.27e-02 |           |           |          |
| ## 22 |                        | 3.17e-02 |           |           |          |
| ## 23 |                        | 4.20e-02 |           |           |          |
| ## 24 |                        | 4.36e-02 |           |           |          |
| ## 25 |                        | 4.50e-02 |           |           |          |
| ## 26 |                        | 8.03e-02 |           |           |          |
| ## 27 |                        | 8.53e-02 |           |           |          |
| ## 28 |                        | 8.53e-02 |           |           |          |
| ## 29 |                        | 8.66e-02 |           |           |          |
| ## 30 |                        | 9.67e-02 |           |           |          |
| ## 31 |                        | 1.00e-01 |           |           |          |
| ## 32 |                        | 1.00e-01 |           |           |          |
| ## 33 |                        | 1.00e-01 |           |           |          |
| ## 34 |                        | 1.06e-01 |           |           |          |
| ## 35 |                        | 1.08e-01 |           |           |          |
| ## 36 |                        | 1.21e-01 |           |           |          |
| ## 37 |                        | 1.23e-01 |           |           |          |
| ## 38 |                        | 1.32e-01 |           |           |          |
| ## 39 |                        | 1.33e-01 |           |           |          |
| ## 40 |                        | 1.39e-01 |           |           |          |
| ## 41 |                        | 1.39e-01 |           |           |          |
| ## 42 |                        | 1.50e-01 |           |           |          |

```

## 43 1.51e-01
## 44 1.54e-01
## [1] ""
## [1] "Table: Gender.x"
## [1] " (from model: "
## [1] " ~ Amputation.at.DATE + Age.x + Gender.x + Hba1c_baseline"
## [1] " + CALSBP + bmi + Smoking + Statin + log_Blood_TGA +"
## [1] " Total_cholesterol)"
## [1] ""
##
##          Name Coefficient      CI.L      CI.R  p.value
## 1      Citric acid, 4TMS; 6    -0.401 -0.55800 -0.24300 5.97e-07
## 2      Methionine, 2TMS; 16     0.389  0.23200  0.54700 1.25e-06
## 3          Valine, 2TMS; 20     0.381  0.22400  0.53800 2.09e-06
## 4          Proline, 2TMS; 21     0.372  0.21400  0.52900 3.66e-06
## 5      Myristoleic acid; 65    -0.365 -0.52200 -0.20700 5.55e-06
## 6          Leucine, 2TMS; 19     0.359  0.20200  0.51600 7.80e-06
## 7          Glycine, 3TMS; 17    -0.349 -0.50600 -0.19200 1.37e-05
## 8      Isoleucine, 2TMS; 18     0.346  0.18900  0.50400 1.62e-05
## 9          Tartronic acid; 73   -0.342 -0.50000 -0.18500 2.00e-05
## 10         Dodecanoic acid; 54   -0.336 -0.49300 -0.17800 2.89e-05
## 11         Glyceric acid; 30     -0.332 -0.48900 -0.17500 3.55e-05
## 12      4-Deoxytetronic acid; 33  0.306  0.14900  0.46300 1.39e-04
## 13         Oleic acid, TMS; 3    -0.302 -0.45900 -0.14500 1.68e-04
## 14      Aminomalonic acid; 45   -0.294 -0.45100 -0.13600 2.53e-04
## 15 2-hydroxy Isovaleric acid; 38  0.289  0.13200  0.44700 3.14e-04
## 16      Cholesterol, TMS; 23    -0.280 -0.43700 -0.12200 4.97e-04
## 17      Myo inositol 6TMS; 1    -0.266 -0.42300 -0.10800 9.31e-04
## 18      Glutamic acid, 3TMS; 8   0.265  0.10700  0.42200 9.83e-04
## 19      Tridecanoic acid; 74    -0.261 -0.41800 -0.10300 1.18e-03
## 20      Heptadecanoic acid; 60   -0.258 -0.41600 -0.10100 1.29e-03
## 21      Docosahexaenoic acid; 53 -0.257 -0.41400 -0.09930 1.39e-03
## 22         Decanoic acid; 52    -0.256 -0.41400 -0.09900 1.41e-03
## 23      Succinic acid, 2TMS; 7   -0.254 -0.41100 -0.09670 1.56e-03
## 24      Heptadecanoic acid; 61   -0.251 -0.40800 -0.09350 1.78e-03
## 25      Nonadecanoic acid; 66   -0.223 -0.38100 -0.06610 5.38e-03
## 26      Palmitic acid, TMS; 5    -0.212 -0.36900 -0.05470 8.25e-03
## 27      Stearic acid, TMS; 2    -0.209 -0.36600 -0.05150 9.29e-03
## 28      Benzeneacetic acid; 47   -0.198 -0.35500 -0.04080 1.36e-02
## 29      Hydroxyproline; 64       0.176  0.01840  0.33300 2.86e-02
## 30      Ribonic acid; 72        -0.175 -0.33200 -0.01770 2.92e-02
## 31      11-Eicosenoic acid; 35   -0.173 -0.33100 -0.01600 3.08e-02
## 32         1-Monopalmitin; 37     0.173  0.01560  0.33000 3.12e-02
## 33         Nonanoic acid; 67     -0.161 -0.31800 -0.00324 4.55e-02
## 34         Tyrosine; 75          -0.156 -0.31300  0.00147 5.22e-02
## 35         Pyruvic acid; 31       0.150 -0.00692  0.30800 6.10e-02
## 36         Glycerol; 57         -0.145 -0.30300  0.01200 7.03e-02
## 37      Arachidonic acid, TMS; 24 -0.144 -0.30100  0.01360 7.34e-02
##
##          p.adj
## 1      4.47e-05
## 2      4.68e-05
## 3      5.24e-05
## 4      6.87e-05
## 5      8.32e-05
## 6      9.75e-05

```

```

## 7 1.47e-04
## 8 1.52e-04
## 9 1.66e-04
## 10 2.17e-04
## 11 2.42e-04
## 12 8.70e-04
## 13 9.68e-04
## 14 1.36e-03
## 15 1.57e-03
## 16 2.33e-03
## 17 4.10e-03
## 18 4.10e-03
## 19 4.64e-03
## 20 4.80e-03
## 21 4.80e-03
## 22 4.80e-03
## 23 5.08e-03
## 24 5.57e-03
## 25 1.61e-02
## 26 2.38e-02
## 27 2.58e-02
## 28 3.64e-02
## 29 7.30e-02
## 30 7.30e-02
## 31 7.31e-02
## 32 7.31e-02
## 33 1.03e-01
## 34 1.15e-01
## 35 1.31e-01
## 36 1.46e-01
## 37 1.49e-01
## [1] ""
## [1] "Table: Hba1c_baseline"
## [1] " (from model: "
## [1] " ~ Amputation.at.DATE + Age.x + Gender.x + Hba1c_baseline"
## [1] " + CALSBP + bmi + Smoking + Statin + log_Blood_TGA +"
## [1] " Total_cholesterol)"
## [1] ""
##
## Name Coefficient CI.L CI.R p.value p.adj
## 1 Tridecanoic acid; 74 -0.1280 -0.19900 -0.05670 0.000427 0.0163
## 2 Arabinopyranose; 51 0.1280 0.05660 0.19900 0.000434 0.0163
## 3 Eicosapentaenoic acid; 55 -0.1220 -0.19300 -0.05120 0.000753 0.0188
## 4 Ethanolamine; 56 0.1160 0.04490 0.18700 0.001390 0.0221
## 5 Docosahexaenoic acid; 53 -0.1140 -0.18500 -0.04240 0.001750 0.0221
## 6 Glyceric acid; 30 -0.1130 -0.18500 -0.04230 0.001770 0.0221
## 7 Valine, 2TMS; 20 0.1110 0.03980 0.18200 0.002240 0.0240
## 8 Alanine, 2TMS; 25 0.1060 0.03470 0.17700 0.003530 0.0331
## 9 Decanoic acid; 52 -0.0949 -0.16600 -0.02380 0.008930 0.0745
## 10 4-Hydroxybutanoic acid; 43 -0.0917 -0.16300 -0.02060 0.011500 0.0861
## 11 11-Eicosenoic acid; 35 -0.0831 -0.15400 -0.01200 0.022100 0.1500
## 12 Lactic acid; 29 0.0795 0.00836 0.15100 0.028500 0.1780
## 13 Myristoleic acid; 65 -0.0771 -0.14800 -0.00599 0.033600 0.1940
## 14 Tartronic acid; 73 -0.0750 -0.14600 -0.00388 0.038800 0.2000
## 15 Leucine, 2TMS; 19 0.0746 0.00344 0.14600 0.039900 0.2000

```

```

## [1] ""
## [1] "Table: CALSBP"
## [1] " (from model: "
## [1] " ~ Amputation.at.DATE + Age.x + Gender.x + Hba1c_baseline"
## [1] " + CALSBP + bmi + Smoking + Statin + log_Blood_TGA +"
## [1] " Total_cholesterol)"
## [1] ""
##
## Name Coefficient CI.L CI.R p.value p.adj
## 1 Myristoleic acid; 65 0.00805 0.00338 0.0127 0.000719 0.0539
## [1] ""
## [1] "Table: bmi"
## [1] " (from model: "
## [1] " ~ Amputation.at.DATE + Age.x + Gender.x + Hba1c_baseline"
## [1] " + CALSBP + bmi + Smoking + Statin + log_Blood_TGA +"
## [1] " Total_cholesterol)"
## [1] ""
##
## Name Coefficient CI.L CI.R p.value
## 1 Glutamic acid, 3TMS; 8 0.0452 0.024700 0.065700 1.58e-05
## 2 2-Hydroxybutyric acid, 2TMS; 2 0.0401 0.019500 0.060600 1.31e-04
## 3 Campesterol; 49 -0.0392 -0.059700 -0.018700 1.82e-04
## 4 Pyruvic acid; 31 -0.0305 -0.051000 -0.009940 3.62e-03
## 5 Decanoic acid; 52 -0.0300 -0.050600 -0.009500 4.14e-03
## 6 Lactic acid; 29 0.0296 0.009100 0.050200 4.67e-03
## 7 Arachidic acid; 46 -0.0294 -0.050000 -0.008910 4.94e-03
## 8 1,3-Propanediol; 34 -0.0292 -0.049700 -0.008630 5.37e-03
## 9 alpha-Tocopherol; 26 -0.0266 -0.047200 -0.006110 1.10e-02
## 10 Pyroglutamic acid; 69 -0.0240 -0.044500 -0.003490 2.18e-02
## 11 Ribitol; 70 0.0240 0.003430 0.044500 2.22e-02
## 12 2,4-Dihydroxybutanoic acid; 28 -0.0238 -0.044400 -0.003310 2.28e-02
## 13 alpha-ketoglutaric acid, TMS M -0.0226 -0.043100 -0.002080 3.09e-02
## 14 Citric acid, 4TMS; 6 -0.0215 -0.042000 -0.000972 4.01e-02
## 15 11-Eicosenoic acid; 35 0.0211 0.000569 0.041600 4.40e-02
## 16 Tartronic acid; 73 -0.0210 -0.041500 -0.000484 4.48e-02
## 17 Nonadecanoic acid; 66 -0.0210 -0.041500 -0.000469 4.50e-02
##
## p.adj
## 1 0.00118
## 2 0.00455
## 3 0.00455
## 4 0.05040
## 5 0.05040
## 6 0.05040
## 7 0.05040
## 8 0.05040
## 9 0.09160
## 10 0.14300
## 11 0.14300
## 12 0.14300
## 13 0.17800
## 14 0.19900
## 15 0.19900
## 16 0.19900
## 17 0.19900
## [1] ""
## [1] "Table: Smoking"

```

```

## [1] " (from model: "
## [1] " ~ Amputation.at.DATE + Age.x + Gender.x + Hba1c_baseline"
## [1] " + CALSBP + bmi + Smoking + Statin + log_Blood_TGA +"
## [1] " Total_cholesterol)"
## [1] ""
##
## Name Coefficient CI.L CI.R p.value p.adj
## 1 Glutamic acid, 3TMS; 8 0.372 0.1790 0.56500 0.000159 0.00571
## 2 3-Indolepropionic acid; 41 -0.369 -0.5620 -0.17600 0.000177 0.00571
## 3 Docosahexaenoic acid; 53 -0.362 -0.5550 -0.16900 0.000241 0.00571
## 4 Tartronic acid; 73 -0.356 -0.5490 -0.16300 0.000305 0.00571
## 5 Glyceric acid; 30 -0.330 -0.5230 -0.13700 0.000817 0.01220
## 6 Citric acid, 4TMS; 6 -0.308 -0.5010 -0.11500 0.001760 0.02200
## 7 alpha-Tocopherol; 26 -0.297 -0.4900 -0.10400 0.002560 0.02740
## 8 Benzeneacetic acid; 47 -0.283 -0.4760 -0.08970 0.004100 0.03840
## 9 Valine, 2TMS; 20 -0.276 -0.4690 -0.08270 0.005120 0.04260
## 10 Campesterol; 49 -0.272 -0.4650 -0.07880 0.005780 0.04340
## 11 Malic acid, 3TMS; 11 -0.258 -0.4510 -0.06540 0.008690 0.05930
## 12 Ribonic acid; 72 -0.255 -0.4480 -0.06190 0.009640 0.06030
## 13 3-Indoleacetic acid; 40 -0.234 -0.4270 -0.04080 0.017600 0.10200
## 14 4-Hydroxyphenyllactic acid; 44 -0.218 -0.4110 -0.02530 0.026600 0.13600
## 15 Leucine, 2TMS; 19 -0.218 -0.4110 -0.02450 0.027200 0.13600
## 16 Ribitol; 70 0.210 0.0175 0.40300 0.032600 0.15300
## 17 Heptadecanoic acid; 60 -0.202 -0.3950 -0.00851 0.040700 0.18000
## [1] ""
## [1] "Table: Statin"
## [1] " (from model: "
## [1] " ~ Amputation.at.DATE + Age.x + Gender.x + Hba1c_baseline"
## [1] " + CALSBP + bmi + Smoking + Statin + log_Blood_TGA +"
## [1] " Total_cholesterol)"
## [1] ""
##
## Name Coefficient CI.L CI.R p.value p.adj
## 1 L-5-Oxoproline; 63 -0.334 -0.5070 -0.1610 0.000156 0.0117
## 2 Campesterol; 49 0.252 0.0794 0.4250 0.004250 0.1590
## 3 Cholesterol, TMS; 23 -0.222 -0.3950 -0.0485 0.012100 0.1770
## 4 Glutamic acid, 3TMS; 8 0.212 0.0391 0.3850 0.016300 0.1770
## 5 Arachidonic acid, TMS; 24 0.211 0.0376 0.3840 0.017000 0.1770
## 6 Arachidic acid; 46 -0.208 -0.3810 -0.0351 0.018400 0.1770
## 7 Heptadecanoic acid; 61 -0.205 -0.3780 -0.0320 0.020200 0.1770
## 8 Aminomalonic acid; 45 -0.205 -0.3780 -0.0317 0.020400 0.1770
## 9 Dodecanoic acid; 54 -0.201 -0.3740 -0.0283 0.022600 0.1770
## 10 Ribitol; 71 0.197 0.0244 0.3700 0.025300 0.1770
## 11 Linoleic acid, TMS; 4 -0.197 -0.3700 -0.0236 0.025900 0.1770
## 12 Ribitol; 70 0.193 0.0199 0.3660 0.028800 0.1800
## [1] ""
## [1] "Table: log_Blood_TGA"
## [1] " (from model: "
## [1] " ~ Amputation.at.DATE + Age.x + Gender.x + Hba1c_baseline"
## [1] " + CALSBP + bmi + Smoking + Statin + log_Blood_TGA +"
## [1] " Total_cholesterol)"
## [1] ""
##
## Name Coefficient CI.L CI.R p.value
## 1 Dodecanoic acid; 54 0.273 0.14400 0.40200 3.44e-05
## 2 Palmitic acid, TMS; 5 0.271 0.14200 0.40000 3.70e-05
## 3 Decanoic acid; 52 0.252 0.12300 0.38100 1.31e-04

```

|       |                                |         |          |          |          |
|-------|--------------------------------|---------|----------|----------|----------|
| ## 4  | Stearic acid, TMS; 2           | 0.250   | 0.12100  | 0.37900  | 1.48e-04 |
| ## 5  | Arachidic acid; 46             | 0.247   | 0.11800  | 0.37600  | 1.70e-04 |
| ## 6  | Octanoic acid; 68              | 0.235   | 0.10600  | 0.36400  | 3.53e-04 |
| ## 7  | 3,4-Dihydroxybutanoic acid; 27 | 0.225   | 0.09620  | 0.35400  | 6.23e-04 |
| ## 8  | Glycerol-glycoside; 59         | 0.218   | 0.08950  | 0.34700  | 8.98e-04 |
| ## 9  | Ribonic acid; 72               | 0.212   | 0.08270  | 0.34100  | 1.30e-03 |
| ## 10 | Oleic acid, TMS; 3             | 0.208   | 0.07940  | 0.33700  | 1.55e-03 |
| ## 11 | 4-Hydroxybenzeneacetic acid; 4 | 0.208   | 0.07870  | 0.33700  | 1.60e-03 |
| ## 12 | Arabinopyranose; 51            | 0.194   | 0.06550  | 0.32300  | 3.12e-03 |
| ## 13 | Ribitol; 71                    | 0.191   | 0.06220  | 0.32000  | 3.67e-03 |
| ## 14 | Heptadecanoic acid; 60         | 0.181   | 0.05250  | 0.31000  | 5.82e-03 |
| ## 15 | 2-Hydroxybutyric acid, 2TMS; 2 | 0.181   | 0.05160  | 0.31000  | 6.06e-03 |
| ## 16 | Lactic acid; 29                | 0.171   | 0.04160  | 0.30000  | 9.54e-03 |
| ## 17 | 2,4-Dihydroxybutanoic acid; 28 | 0.167   | 0.03780  | 0.29600  | 1.13e-02 |
| ## 18 | Glutamic acid, 3TMS; 8         | 0.166   | 0.03710  | 0.29500  | 1.16e-02 |
| ## 19 | Heptadecanoic acid; 61         | 0.165   | 0.03600  | 0.29400  | 1.22e-02 |
| ## 20 | Fumaric acid, 2TMS; 9          | 0.163   | 0.03370  | 0.29200  | 1.34e-02 |
| ## 21 | Valine, 2TMS; 20               | 0.160   | 0.03150  | 0.28900  | 1.48e-02 |
| ## 22 | Pyruvic acid; 31               | 0.159   | 0.03040  | 0.28800  | 1.54e-02 |
| ## 23 | Isoleucine, 2TMS; 18           | 0.159   | 0.02970  | 0.28800  | 1.59e-02 |
| ## 24 | Aminomalonic acid; 45          | -0.154  | -0.28300 | -0.02550 | 1.89e-02 |
| ## 25 | Myristoleic acid; 65           | 0.153   | 0.02450  | 0.28200  | 1.97e-02 |
| ## 26 | 4-Hydroxybutanoic acid; 43     | 0.153   | 0.02430  | 0.28200  | 1.99e-02 |
| ## 27 | alpha-ketoglutaric acid, TMS M | 0.152   | 0.02340  | 0.28100  | 2.06e-02 |
| ## 28 | 4-Deoxytetronic acid; 33       | 0.151   | 0.02170  | 0.28000  | 2.20e-02 |
| ## 29 | Myo inositol 6TMS; 1           | 0.149   | 0.01960  | 0.27700  | 2.40e-02 |
| ## 30 | Malic acid, 3TMS; 11           | 0.148   | 0.01880  | 0.27700  | 2.47e-02 |
| ## 31 | Leucine, 2TMS; 19              | 0.141   | 0.01240  | 0.27000  | 3.17e-02 |
| ## 32 | 3-Indolepropionic acid; 41     | -0.139  | -0.26800 | -0.00987 | 3.49e-02 |
| ## 33 | Proline, 2TMS; 21              | 0.138   | 0.00901  | 0.26700  | 3.60e-02 |
| ## 34 | Glyceric acid; 30              | -0.136  | -0.26500 | -0.00727 | 3.84e-02 |
| ## 35 | Arachidonic acid, TMS; 24      | 0.134   | 0.00531  | 0.26300  | 4.13e-02 |
| ## 36 | Succinic acid, 2TMS; 7         | 0.132   | 0.00274  | 0.26100  | 4.53e-02 |
| ## 37 | Nonadecanoic acid; 66          | 0.123   | -0.00623 | 0.25200  | 6.21e-02 |
| ## 38 | Tartronic acid; 73             | -0.122  | -0.25100 | 0.00716  | 6.42e-02 |
| ## 39 | 1,3-Propanediol; 34            | 0.116   | -0.01310 | 0.24500  | 7.82e-02 |
| ## 40 | 3-Hydroxybutyric acid, 2TMS; 1 | 0.114   | -0.01470 | 0.24300  | 8.24e-02 |
| ## 41 | Tridecanoic acid; 74           | 0.112   | -0.01700 | 0.24100  | 8.90e-02 |
| ## 42 | Serine, 3TMS; 14               | -0.112  | -0.24100 | 0.01710  | 8.90e-02 |
| ## 43 | 3-Indoleacetic acid; 40        | 0.111   | -0.01770 | 0.24000  | 9.08e-02 |
| ## 44 | Nonanoic acid; 67              | 0.105   | -0.02360 | 0.23400  | 1.09e-01 |
| ##    | p.adj                          |         |          |          |          |
| ## 1  |                                | 0.00139 |          |          |          |
| ## 2  |                                | 0.00139 |          |          |          |
| ## 3  |                                | 0.00254 |          |          |          |
| ## 4  |                                | 0.00254 |          |          |          |
| ## 5  |                                | 0.00254 |          |          |          |
| ## 6  |                                | 0.00442 |          |          |          |
| ## 7  |                                | 0.00668 |          |          |          |
| ## 8  |                                | 0.00842 |          |          |          |
| ## 9  |                                | 0.01080 |          |          |          |
| ## 10 |                                | 0.01090 |          |          |          |
| ## 11 |                                | 0.01090 |          |          |          |
| ## 12 |                                | 0.01950 |          |          |          |

```

## 13 0.02120
## 14 0.03030
## 15 0.03030
## 16 0.04470
## 17 0.04800
## 18 0.04800
## 19 0.04800
## 20 0.05040
## 21 0.05190
## 22 0.05190
## 23 0.05190
## 24 0.05730
## 25 0.05730
## 26 0.05730
## 27 0.05730
## 28 0.05910
## 29 0.06170
## 30 0.06170
## 31 0.07670
## 32 0.08170
## 33 0.08180
## 34 0.08470
## 35 0.08850
## 36 0.09450
## 37 0.12600
## 38 0.12700
## 39 0.15000
## 40 0.15400
## 41 0.15800
## 42 0.15800
## 43 0.15800
## 44 0.18600
## [1] ""
## [1] "Table: Total_cholesterol"
## [1] " (from model: "
## [1] " ~ Amputation.at.DATE + Age.x + Gender.x + Hba1c_baseline"
## [1] " + CALSBP + bmi + Smoking + Statin + log_Blood_TGA +"
## [1] " Total_cholesterol)"
## [1] ""
##
## Name Coefficient CI.L CI.R p.value
## 1 Cholesterol, TMS; 23 0.4590 0.36200 0.55500 1.02e-20
## 2 Campesterol; 49 0.3640 0.26800 0.46000 1.23e-13
## 3 alpha-Tocopherol; 26 0.3230 0.22700 0.41900 4.95e-11
## 4 Benzeneacetic acid; 47 -0.1950 -0.29100 -0.09830 7.46e-05
## 5 Linoleic acid, TMS; 4 0.1800 0.08400 0.27700 2.42e-04
## 6 4-Hydroxybutanoic acid; 43 -0.1800 -0.27600 -0.08330 2.56e-04
## 7 Proline, 2TMS; 21 -0.1770 -0.27300 -0.08040 3.23e-04
## 8 Glycine, 3TMS; 17 -0.1700 -0.26600 -0.07370 5.39e-04
## 9 2,4-Dihydroxybutanoic acid; 28 -0.1670 -0.26300 -0.07070 6.73e-04
## 10 L-5-Oxoproline; 63 -0.1660 -0.26200 -0.06970 7.30e-04
## 11 Isoleucine, 2TMS; 18 -0.1510 -0.24700 -0.05470 2.11e-03
## 12 4-Hydroxybenzeneacetic acid; 4 -0.1510 -0.24700 -0.05460 2.14e-03
## 13 Tyrosine; 75 -0.1480 -0.24400 -0.05190 2.56e-03
## 14 Arabinopyranose; 51 -0.1460 -0.24300 -0.05010 2.89e-03

```



|       |                                |          |          |          |          |
|-------|--------------------------------|----------|----------|----------|----------|
| ## 15 | Eicosapentaenoic acid; 55      | 0.1460   | 0.04990  | 0.24200  | 2.92e-03 |
| ## 16 | Docosahexaenoic acid; 53       | 0.1460   | 0.04950  | 0.24200  | 3.00e-03 |
| ## 17 | Glycerol-glycoside; 59         | -0.1440  | -0.24100 | -0.04820 | 3.26e-03 |
| ## 18 | Threonine, 3TMS; 12            | -0.1410  | -0.23700 | -0.04460 | 4.14e-03 |
| ## 19 | Methionine, 2TMS; 16           | -0.1410  | -0.23700 | -0.04450 | 4.16e-03 |
| ## 20 | Alanine, 2TMS; 25              | -0.1390  | -0.23500 | -0.04300 | 4.58e-03 |
| ## 21 | Ribitol; 71                    | -0.1370  | -0.23400 | -0.04120 | 5.12e-03 |
| ## 22 | 2-Palmitoylglycerol; 39        | 0.1340   | 0.03740  | 0.23000  | 6.49e-03 |
| ## 23 | 3-Indoleacetic acid; 40        | -0.1300  | -0.22600 | -0.03340 | 8.29e-03 |
| ## 24 | Hydroxylamine; 62              | -0.1210  | -0.21700 | -0.02440 | 1.40e-02 |
| ## 25 | Ribonic acid; 72               | -0.1190  | -0.21500 | -0.02290 | 1.52e-02 |
| ## 26 | Serine, 3TMS; 14               | -0.1170  | -0.21300 | -0.02090 | 1.70e-02 |
| ## 27 | Phenylalanine, 2TMS; 13        | -0.1150  | -0.21100 | -0.01890 | 1.90e-02 |
| ## 28 | 3,4-Dihydroxybutanoic acid; 27 | -0.1130  | -0.20900 | -0.01680 | 2.14e-02 |
| ## 29 | Malic acid, 3TMS; 11           | -0.1010  | -0.19700 | -0.00444 | 4.03e-02 |
| ## 30 | Pyruvic acid; 31               | -0.1000  | -0.19600 | -0.00391 | 4.14e-02 |
| ## 31 | Palmitic acid, TMS; 5          | 0.0994   | 0.00314  | 0.19600  | 4.30e-02 |
| ## 32 | 2-Hydroxybutyric acid, 2TMS; 2 | 0.0913   | -0.00497 | 0.18800  | 6.31e-02 |
| ## 33 | Myo inositol 6TMS; 1           | -0.0889  | -0.18500 | 0.00739  | 7.04e-02 |
| ## 34 | 1,3-Propanediol; 34            | -0.0825  | -0.17900 | 0.01370  | 9.29e-02 |
| ## 35 | 3-Indolepropionic acid; 41     | 0.0821   | -0.01410 | 0.17800  | 9.44e-02 |
| ## 36 | Leucine, 2TMS; 19              | -0.0820  | -0.17800 | 0.01430  | 9.51e-02 |
| ##    | p.adj                          |          |          |          |          |
| ## 1  |                                | 7.65e-19 |          |          |          |
| ## 2  |                                | 4.63e-12 |          |          |          |
| ## 3  |                                | 1.24e-09 |          |          |          |
| ## 4  |                                | 1.40e-03 |          |          |          |
| ## 5  |                                | 3.20e-03 |          |          |          |
| ## 6  |                                | 3.20e-03 |          |          |          |
| ## 7  |                                | 3.46e-03 |          |          |          |
| ## 8  |                                | 5.05e-03 |          |          |          |
| ## 9  |                                | 5.48e-03 |          |          |          |
| ## 10 |                                | 5.48e-03 |          |          |          |
| ## 11 |                                | 1.34e-02 |          |          |          |
| ## 12 |                                | 1.34e-02 |          |          |          |
| ## 13 |                                | 1.41e-02 |          |          |          |
| ## 14 |                                | 1.41e-02 |          |          |          |
| ## 15 |                                | 1.41e-02 |          |          |          |
| ## 16 |                                | 1.41e-02 |          |          |          |
| ## 17 |                                | 1.44e-02 |          |          |          |
| ## 18 |                                | 1.64e-02 |          |          |          |
| ## 19 |                                | 1.64e-02 |          |          |          |
| ## 20 |                                | 1.72e-02 |          |          |          |
| ## 21 |                                | 1.83e-02 |          |          |          |
| ## 22 |                                | 2.21e-02 |          |          |          |
| ## 23 |                                | 2.70e-02 |          |          |          |
| ## 24 |                                | 4.37e-02 |          |          |          |
| ## 25 |                                | 4.57e-02 |          |          |          |
| ## 26 |                                | 4.92e-02 |          |          |          |
| ## 27 |                                | 5.29e-02 |          |          |          |
| ## 28 |                                | 5.72e-02 |          |          |          |
| ## 29 |                                | 1.03e-01 |          |          |          |
| ## 30 |                                | 1.03e-01 |          |          |          |
| ## 31 |                                | 1.04e-01 |          |          |          |

```
## 32 1.48e-01
## 33 1.60e-01
## 34 1.98e-01
## 35 1.98e-01
## 36 1.98e-01
```

### 5.1.2.3 Table with All Metabolites

```

## [1] ""
## [1] "Table: Amputation.at.DATEJA"
## [1] " (from model: "
## [1] " ~ Amputation.at.DATE + Age.x + Gender.x + Hba1c_baseline"
## [1] " + CALSBP + bmi + Smoking + Statin + log_Blood_TGA +"
## [1] " Total_cholesterol)"
## [1] ""
##
## Name Coefficient CI.L CI.R p.value p.adj
## 1 Ribonic acid; 72 0.72500 0.30400 1.15000 0.00073 0.0547
## 2 Myo inositol 6TMS; 1 0.61300 0.19300 1.03000 0.00427 0.1600
## 3 Succinic acid, 2TMS; 7 0.57900 0.15800 0.99900 0.00702 0.1760
## 4 Threonine, 3TMS; 12 -0.53500 -0.95600 -0.11500 0.01260 0.2230
## 5 4-Hydroxybenzeneacetic acid; 4 0.52300 0.10200 0.94300 0.01490 0.2230
## 6 Glutamic acid, 3TMS; 8 -0.47300 -0.89400 -0.05280 0.02740 0.2790
## 7 Creatinine; 50 0.46200 0.04150 0.88300 0.03130 0.2790
## 8 Tyrosine; 75 -0.45400 -0.87500 -0.03350 0.03430 0.2790
## 9 Ribitol; 71 0.45300 0.03270 0.87400 0.03470 0.2790
## 10 Methionine, 2TMS; 16 -0.43700 -0.85700 -0.01600 0.04190 0.2790
## 11 Glycerol; 57 0.43400 0.01350 0.85500 0.04310 0.2790
## 12 Pyroglutamic acid; 69 0.42900 0.00845 0.85000 0.04560 0.2790
## 13 Phenylalanine, 2TMS; 13 -0.42400 -0.84400 -0.00314 0.04830 0.2790
## 14 2,4-Dihydroxybutanoic acid; 28 0.38800 -0.03270 0.80900 0.07070 0.3550
## 15 Hydroxyproline; 64 0.38700 -0.03320 0.80800 0.07100 0.3550
## 16 3,4-Dihydroxybutanoic acid; 27 0.37900 -0.04200 0.79900 0.07770 0.3640
## 17 Valine, 2TMS; 20 -0.37100 -0.79100 0.05010 0.08420 0.3690
## 18 4-Hydroxyphenyllactic acid; 44 0.36500 -0.05520 0.78600 0.08860 0.3690
## 19 Leucine, 2TMS; 19 -0.35900 -0.78000 0.06130 0.09410 0.3710
## 20 Malic acid, 3TMS; 11 0.35100 -0.06950 0.77200 0.10200 0.3820
## 21 Heptadecanoic acid; 61 0.30600 -0.11500 0.72700 0.15400 0.5150
## 22 Serine, 3TMS; 14 -0.30500 -0.72600 0.11600 0.15500 0.5150
## 23 Proline, 2TMS; 21 -0.30300 -0.72400 0.11800 0.15800 0.5150
## 24 4-Deoxytetroneic acid; 33 0.28700 -0.13400 0.70800 0.18100 0.5390
## 25 4-Deoxytetroneic acid; 32 0.28600 -0.13500 0.70700 0.18300 0.5390
## 26 2-hydroxy Isovaleric acid; 38 -0.28300 -0.70400 0.13700 0.18700 0.5390
## 27 4-Hydroxybutanoic acid; 43 0.27300 -0.14800 0.69400 0.20300 0.5600
## 28 Arabinopyranose; 51 -0.26600 -0.68700 0.15400 0.21500 0.5600
## 29 3-Indolepropionic acid; 41 -0.26500 -0.68600 0.15500 0.21700 0.5600
## 30 Myristoleic acid; 65 0.25900 -0.16200 0.68000 0.22800 0.5600
## 31 Dodecanoic acid; 54 0.25700 -0.16400 0.67800 0.23100 0.5600
## 32 Campesterol; 49 -0.23600 -0.65700 0.18400 0.27100 0.6340
## 33 Stearic acid, TMS; 2 0.22900 -0.19200 0.64900 0.28700 0.6510
## 34 Alanine, 2TMS; 25 0.21600 -0.20500 0.63600 0.31500 0.6950
## 35 2-Palmitoylglycerol; 39 -0.20800 -0.62900 0.21200 0.33200 0.7120
## 36 Aminomalonic acid; 45 -0.19400 -0.61400 0.22700 0.36700 0.7360
## 37 Heptadecanoic acid; 60 0.19200 -0.22800 0.61300 0.37000 0.7360
## 38 Glyceryl-glycoside; 59 0.18900 -0.23100 0.61000 0.37800 0.7360
## 39 Eicosapentaenoic acid; 55 -0.18700 -0.60800 0.23300 0.38300 0.7360
## 40 Hydroxylamine; 62 0.16600 -0.25400 0.58700 0.43800 0.8140
## 41 Tridecanoic acid; 74 0.16000 -0.26100 0.58000 0.45700 0.8140
## 42 11-Eicosenoic acid; 35 0.15900 -0.26200 0.58000 0.45900 0.8140
## 43 Isoleucine, 2TMS; 18 -0.15600 -0.57700 0.26400 0.46700 0.8140
## 44 alpha-Tocopherol; 26 -0.14300 -0.56400 0.27800 0.50500 0.8440

```

|       |                                |          |          |         |         |        |
|-------|--------------------------------|----------|----------|---------|---------|--------|
| ## 45 | Decanoic acid; 52              | 0.14200  | -0.27900 | 0.56200 | 0.50900 | 0.8440 |
| ## 46 | Ribitol; 70                    | 0.13900  | -0.28200 | 0.56000 | 0.51800 | 0.8440 |
| ## 47 | Glyceric acid; 30              | -0.12900 | -0.54900 | 0.29200 | 0.54800 | 0.8750 |
| ## 48 | Palmitic acid, TMS; 5          | 0.12500  | -0.29600 | 0.54600 | 0.56100 | 0.8760 |
| ## 49 | 1-Monopalmitin; 37             | 0.11700  | -0.30400 | 0.53700 | 0.58700 | 0.8790 |
| ## 50 | 3-Indoleacetic acid; 40        | 0.11100  | -0.31000 | 0.53100 | 0.60700 | 0.8790 |
| ## 51 | Tartronic acid; 73             | -0.11000 | -0.53100 | 0.31000 | 0.60700 | 0.8790 |
| ## 52 | Arachidic acid; 46             | 0.10900  | -0.31200 | 0.53000 | 0.61200 | 0.8790 |
| ## 53 | 1-Dodecanol; 36                | 0.10600  | -0.31500 | 0.52700 | 0.62100 | 0.8790 |
| ## 54 | 2-Hydroxybutyric acid, 2TMS; 2 | 0.09480  | -0.32600 | 0.51500 | 0.65900 | 0.9010 |
| ## 55 | Fumaric acid, 2TMS; 9          | 0.09430  | -0.32600 | 0.51500 | 0.66000 | 0.9010 |
| ## 56 | Lactic acid; 29                | 0.08210  | -0.33900 | 0.50300 | 0.70200 | 0.9210 |
| ## 57 | Octanoic acid; 68              | 0.07920  | -0.34100 | 0.50000 | 0.71200 | 0.9210 |
| ## 58 | alpha-ketoglutaric acid, TMS M | -0.07920 | -0.50000 | 0.34100 | 0.71200 | 0.9210 |
| ## 59 | Citric acid, 4TMS; 6           | 0.07570  | -0.34500 | 0.49600 | 0.72400 | 0.9210 |
| ## 60 | Nonadecanoic acid; 66          | 0.05690  | -0.36400 | 0.47800 | 0.79100 | 0.9560 |
| ## 61 | L-5-Oxoproline; 63             | -0.05560 | -0.47600 | 0.36500 | 0.79600 | 0.9560 |
| ## 62 | Nonanoic acid; 67              | 0.05470  | -0.36600 | 0.47500 | 0.79900 | 0.9560 |
| ## 63 | Glycerol; 58                   | 0.05240  | -0.36800 | 0.47300 | 0.80700 | 0.9560 |
| ## 64 | Bisphenol A; 48                | -0.04820 | -0.46900 | 0.37200 | 0.82200 | 0.9560 |
| ## 65 | Arachidonic acid, TMS; 24      | 0.03780  | -0.38300 | 0.45800 | 0.86000 | 0.9560 |
| ## 66 | Glycine, 3TMS; 17              | 0.03440  | -0.38600 | 0.45500 | 0.87200 | 0.9560 |
| ## 67 | Oleic acid, TMS; 3             | 0.03000  | -0.39100 | 0.45100 | 0.88900 | 0.9560 |
| ## 68 | Ethanolamine; 56               | 0.02680  | -0.39400 | 0.44700 | 0.90100 | 0.9560 |
| ## 69 | 3-Hydroxybutyric acid, 2TMS; 1 | 0.02420  | -0.39600 | 0.44500 | 0.91000 | 0.9560 |
| ## 70 | 1,3-Propanediol; 34            | 0.02310  | -0.39800 | 0.44400 | 0.91400 | 0.9560 |
| ## 71 | Benzeneacetic acid; 47         | 0.01990  | -0.40100 | 0.44100 | 0.92600 | 0.9560 |
| ## 72 | Pyruvic acid; 31               | 0.01910  | -0.40200 | 0.44000 | 0.92900 | 0.9560 |
| ## 73 | Docosahexaenoic acid; 53       | -0.01870 | -0.43900 | 0.40200 | 0.93000 | 0.9560 |
| ## 74 | Linoleic acid, TMS; 4          | 0.01280  | -0.40800 | 0.43300 | 0.95300 | 0.9640 |
| ## 75 | Cholesterol, TMS; 23           | 0.00965  | -0.41100 | 0.43000 | 0.96400 | 0.9640 |

### 5.1.3 Adjusted Model with eGFR

```
## [1] "Fitting models:"  
## [1] "~ Amputation.at.DATE + Age.x + Gender.x + Hba1c_baseline + CALSBP + bmi + Smoking + Statin + lo  
## [1] ""
```

### 5.1.3.1 Forest Plot of Model Coefficients

```
## Warning: Ignoring unknown aesthetics: x
## NULL
```

### 5.1.3.2 Tables of Model Coefficients

```

## [1] ""
## [1] "Table: Amputation.at.DATEJA"
## [1] " (from model: "
## [1] " ~ Amputation.at.DATE + Age.x + Gender.x + Hba1c_baseline"
## [1] " + CALSBP + bmi + Smoking + Statin + log_Blood_TGA +"
## [1] " Total_cholesterol + egfr)"
## [1] ""
## [1] "No significant associations at p.adj < 0.2"
## [1] ""
## [1] "Table: Age.x"
## [1] " (from model: "
## [1] " ~ Amputation.at.DATE + Age.x + Gender.x + Hba1c_baseline"
## [1] " + CALSBP + bmi + Smoking + Statin + log_Blood_TGA +"
## [1] " Total_cholesterol + egfr)"
## [1] ""
##
## Name Coefficient CI.L CI.R p.value
## 1 Eicosapentaenoic acid; 55 0.02470 1.79e-02 0.031500 1.45e-12
## 2 Docosahexaenoic acid; 53 0.01520 8.38e-03 0.022000 1.33e-05
## 3 Glyceric acid; 30 0.01200 5.22e-03 0.018900 5.50e-04
## 4 alpha-Tocopherol; 26 0.01160 4.74e-03 0.018400 9.00e-04
## 5 Pyruvic acid; 31 0.01150 4.58e-03 0.018400 1.13e-03
## 6 Decanoic acid; 52 0.01140 4.53e-03 0.018300 1.15e-03
## 7 alpha-ketoglutaric acid, TMS M 0.01140 4.47e-03 0.018300 1.28e-03
## 8 Aminomalonic acid; 45 0.01030 3.42e-03 0.017200 3.35e-03
## 9 4-Hydroxybenzeneacetic acid; 4 0.00987 3.10e-03 0.016600 4.28e-03
## 10 3-Indoleacetic acid; 40 0.00984 2.97e-03 0.016700 5.01e-03
## 11 Tyrosine; 75 0.00917 2.25e-03 0.016100 9.38e-03
## 12 2,4-Dihydroxybutanoic acid; 28 0.00874 2.06e-03 0.015400 1.04e-02
## 13 Ribitol; 70 0.00901 2.10e-03 0.015900 1.06e-02
## 14 Palmitic acid, TMS; 5 0.00845 1.57e-03 0.015300 1.61e-02
## 15 Malic acid, 3TMS; 11 0.00814 1.23e-03 0.015100 2.10e-02
## 16 11-Eicosenoic acid; 35 0.00816 1.23e-03 0.015100 2.11e-02
## 17 Myristoleic acid; 65 0.00800 1.14e-03 0.014900 2.24e-02
## 18 Succinic acid, 2TMS; 7 0.00797 1.05e-03 0.014900 2.41e-02
## 19 Glutamic acid, 3TMS; 8 0.00759 7.85e-04 0.014400 2.88e-02
## 20 Heptadecanoic acid; 61 0.00765 7.25e-04 0.014600 3.04e-02
## 21 Fumaric acid, 2TMS; 9 0.00741 4.93e-04 0.014300 3.58e-02
## 22 Dodecanoic acid; 54 0.00730 4.23e-04 0.014200 3.75e-02
## 23 Oleic acid, TMS; 3 0.00727 3.72e-04 0.014200 3.89e-02
## 24 Tartronic acid; 73 0.00703 1.73e-04 0.013900 4.45e-02
## 25 Glycerol; 57 0.00706 1.19e-04 0.014000 4.62e-02
## 26 Alanine, 2TMS; 25 0.00701 9.85e-05 0.013900 4.68e-02
## 27 L-5-Oxoproline; 63 0.00688 -3.89e-05 0.013800 5.13e-02
## 28 Octanoic acid; 68 0.00683 -7.90e-05 0.013700 5.27e-02
## 29 Hydroxylamine; 62 -0.00677 -1.37e-02 0.000172 5.60e-02
## 30 Glycine, 3TMS; 17 0.00662 -2.35e-04 0.013500 5.84e-02
## 31 4-Hydroxyphenyllactic acid; 44 0.00662 -2.74e-04 0.013500 5.98e-02
## 32 Phenylalanine, 2TMS; 13 0.00660 -3.33e-04 0.013500 6.21e-02
## 33 2-Palmitoylglycerol; 39 0.00660 -3.40e-04 0.013500 6.23e-02
## 34 Hydroxyproline; 64 -0.00654 -1.35e-02 0.000363 6.33e-02
## 35 Nonadecanoic acid; 66 0.00654 -3.90e-04 0.013500 6.43e-02
## 36 Methionine, 2TMS; 16 0.00645 -4.26e-04 0.013300 6.60e-02

```

```

## 37          Stearic acid, TMS; 2      0.00617 -7.25e-04 0.013100 7.94e-02
## 38          Heptadecanoic acid; 60    0.00612 -8.02e-04 0.013000 8.31e-02
## 39          Myo inositol 6TMS; 1      0.00557 -1.08e-03 0.012200 1.01e-01
##          p.adj
## 1  1.08e-10
## 2  5.00e-04
## 3  1.37e-02
## 4  1.37e-02
## 5  1.37e-02
## 6  1.37e-02
## 7  1.37e-02
## 8  3.14e-02
## 9  3.57e-02
## 10 3.76e-02
## 11 6.11e-02
## 12 6.11e-02
## 13 6.11e-02
## 14 8.62e-02
## 15 9.87e-02
## 16 9.87e-02
## 17 9.88e-02
## 18 1.00e-01
## 19 1.14e-01
## 20 1.14e-01
## 21 1.27e-01
## 22 1.27e-01
## 23 1.27e-01
## 24 1.35e-01
## 25 1.35e-01
## 26 1.35e-01
## 27 1.37e-01
## 28 1.37e-01
## 29 1.37e-01
## 30 1.37e-01
## 31 1.37e-01
## 32 1.37e-01
## 33 1.37e-01
## 34 1.37e-01
## 35 1.37e-01
## 36 1.37e-01
## 37 1.61e-01
## 38 1.64e-01
## 39 1.94e-01
## [1] ""
## [1] "Table: Gender.x"
## [1] " (from model: "
## [1] " ~ Amputation.at.DATE + Age.x + Gender.x + Hba1c_baseline"
## [1] " + CALSBP + bmi + Smoking + Statin + log_Blood_TGA +"
## [1] " Total_cholesterol + egfr)"
## [1] ""
##          Name Coefficient      CI.L      CI.R p.value
## 1  4-Deoxytetric acid; 33      0.431  0.27200  0.58900 1.06e-07
## 2  Myristoleic acid; 65      -0.384 -0.54300 -0.22500 2.46e-06
## 3  Glyceric acid; 30        -0.375 -0.53400 -0.21700 3.61e-06

```



|       |                               |        |          |          |          |
|-------|-------------------------------|--------|----------|----------|----------|
| ## 4  | Proline, 2TMS; 21             | 0.374  | 0.21500  | 0.53400  | 4.34e-06 |
| ## 5  | Tartronic acid; 73            | -0.348 | -0.50700 | -0.18900 | 1.91e-05 |
| ## 6  | Dodecanoic acid; 54           | -0.348 | -0.50800 | -0.18800 | 1.99e-05 |
| ## 7  | Cholesterol, TMS; 23          | -0.321 | -0.47700 | -0.16600 | 5.17e-05 |
| ## 8  | Methionine, 2TMS; 16          | 0.326  | 0.16700  | 0.48600  | 6.33e-05 |
| ## 9  | Oleic acid, TMS; 3            | -0.319 | -0.47900 | -0.15900 | 9.77e-05 |
| ## 10 | Citric acid, 4TMS; 6          | -0.306 | -0.46500 | -0.14800 | 1.57e-04 |
| ## 11 | Docosahexaenoic acid; 53      | -0.294 | -0.45300 | -0.13600 | 2.79e-04 |
| ## 12 | Glycine, 3TMS; 17             | -0.290 | -0.44900 | -0.13100 | 3.59e-04 |
| ## 13 | Leucine, 2TMS; 19             | 0.289  | 0.13000  | 0.44800  | 3.66e-04 |
| ## 14 | Valine, 2TMS; 20              | 0.282  | 0.12500  | 0.44000  | 4.52e-04 |
| ## 15 | Decanoic acid; 52             | -0.281 | -0.44000 | -0.12100 | 5.69e-04 |
| ## 16 | Stearic acid, TMS; 2          | -0.274 | -0.43400 | -0.11400 | 8.04e-04 |
| ## 17 | Aminomalonic acid; 45         | -0.267 | -0.42600 | -0.10800 | 1.04e-03 |
| ## 18 | Tridecanoic acid; 74          | -0.264 | -0.42400 | -0.10300 | 1.31e-03 |
| ## 19 | Palmitic acid, TMS; 5         | -0.261 | -0.42100 | -0.10200 | 1.35e-03 |
| ## 20 | Heptadecanoic acid; 61        | -0.262 | -0.42300 | -0.10100 | 1.40e-03 |
| ## 21 | Heptadecanoic acid; 60        | -0.258 | -0.41900 | -0.09730 | 1.67e-03 |
| ## 22 | Glutamic acid, 3TMS; 8        | 0.252  | 0.09370  | 0.41000  | 1.81e-03 |
| ## 23 | Hydroxyproline; 64            | 0.252  | 0.09150  | 0.41200  | 2.10e-03 |
| ## 24 | Isoleucine, 2TMS; 18          | 0.235  | 0.07700  | 0.39300  | 3.57e-03 |
| ## 25 | 2-hydroxy Isovaleric acid; 38 | 0.238  | 0.07740  | 0.39800  | 3.70e-03 |
| ## 26 | Succinic acid, 2TMS; 7        | -0.237 | -0.39800 | -0.07660 | 3.81e-03 |
| ## 27 | Nonadecanoic acid; 66         | -0.230 | -0.39100 | -0.06930 | 5.07e-03 |
| ## 28 | Tyrosine; 75                  | -0.214 | -0.37400 | -0.05310 | 9.14e-03 |
| ## 29 | Glycerol; 57                  | -0.198 | -0.35900 | -0.03680 | 1.61e-02 |
| ## 30 | 1-Monopalmitin; 37            | 0.168  | 0.00644  | 0.32900  | 4.15e-02 |
| ## 31 | 11-Eicosenoic acid; 35        | -0.166 | -0.32700 | -0.00523 | 4.30e-02 |
| ## 32 | Arachidonic acid, TMS; 24     | -0.158 | -0.31900 | 0.00320  | 5.47e-02 |
| ## 33 | Nonanoic acid; 67             | -0.157 | -0.31800 | 0.00459  | 5.69e-02 |
| ## 34 | Benzeneacetic acid; 47        | -0.154 | -0.31400 | 0.00649  | 6.00e-02 |
| ##    | p.adj                         |        |          |          |          |
| ## 1  | 7.96e-06                      |        |          |          |          |
| ## 2  | 8.14e-05                      |        |          |          |          |
| ## 3  | 8.14e-05                      |        |          |          |          |
| ## 4  | 8.14e-05                      |        |          |          |          |
| ## 5  | 2.48e-04                      |        |          |          |          |
| ## 6  | 2.48e-04                      |        |          |          |          |
| ## 7  | 5.53e-04                      |        |          |          |          |
| ## 8  | 5.93e-04                      |        |          |          |          |
| ## 9  | 8.14e-04                      |        |          |          |          |
| ## 10 | 1.17e-03                      |        |          |          |          |
| ## 11 | 1.90e-03                      |        |          |          |          |
| ## 12 | 2.11e-03                      |        |          |          |          |
| ## 13 | 2.11e-03                      |        |          |          |          |
| ## 14 | 2.42e-03                      |        |          |          |          |
| ## 15 | 2.84e-03                      |        |          |          |          |
| ## 16 | 3.77e-03                      |        |          |          |          |
| ## 17 | 4.58e-03                      |        |          |          |          |
| ## 18 | 5.23e-03                      |        |          |          |          |
| ## 19 | 5.23e-03                      |        |          |          |          |
| ## 20 | 5.23e-03                      |        |          |          |          |
| ## 21 | 5.95e-03                      |        |          |          |          |
| ## 22 | 6.17e-03                      |        |          |          |          |

```

## 23 6.83e-03
## 24 1.10e-02
## 25 1.10e-02
## 26 1.10e-02
## 27 1.41e-02
## 28 2.45e-02
## 29 4.15e-02
## 30 1.04e-01
## 31 1.04e-01
## 32 1.28e-01
## 33 1.29e-01
## 34 1.32e-01
## [1] ""
## [1] "Table: Hba1c_baseline"
## [1] " (from model: "
## [1] " ~ Amputation.at.DATE + Age.x + Gender.x + Hba1c_baseline"
## [1] " + CALSBP + bmi + Smoking + Statin + log_Blood_TGA +"
## [1] " Total_cholesterol + egfr)"
## [1] ""
##
## Name Coefficient CI.L CI.R p.value p.adj
## 1 Eicosapentaenoic acid; 55 -0.1300 -0.20000 -0.06040 0.000263 0.0112
## 2 Tridecanoic acid; 74 -0.1320 -0.20300 -0.06030 0.000300 0.0112
## 3 Arabinopyranose; 51 0.1260 0.05540 0.19700 0.000493 0.0123
## 4 Docosahexaenoic acid; 53 -0.1210 -0.19100 -0.05080 0.000743 0.0139
## 5 Glyceric acid; 30 -0.1140 -0.18400 -0.04380 0.001470 0.0209
## 6 Alanine, 2TMS; 25 0.1140 0.04300 0.18500 0.001670 0.0209
## 7 Ethanolamine; 56 0.1120 0.04050 0.18300 0.002130 0.0229
## 8 Valine, 2TMS; 20 0.1030 0.03320 0.17300 0.003850 0.0361
## 9 Decanoic acid; 52 -0.0960 -0.16700 -0.02530 0.007790 0.0650
## 10 4-Hydroxybutanoic acid; 43 -0.0884 -0.16000 -0.01710 0.015100 0.1130
## 11 Citric acid, 4TMS; 6 0.0818 0.01150 0.15200 0.022500 0.1430
## 12 11-Eicosenoic acid; 35 -0.0827 -0.15400 -0.01150 0.022900 0.1430
## 13 Myristoleic acid; 65 -0.0782 -0.14900 -0.00756 0.030000 0.1710
## 14 Lactic acid; 29 0.0778 0.00676 0.14900 0.031900 0.1710
## 15 Octanoic acid; 68 -0.0743 -0.14500 -0.00330 0.040300 0.1850
## 16 Proline, 2TMS; 21 0.0737 0.00309 0.14400 0.040800 0.1850
## 17 Glyceryl-glycoside; 59 0.0735 0.00266 0.14400 0.042000 0.1850
## [1] ""
## [1] "Table: CALSBP"
## [1] " (from model: "
## [1] " ~ Amputation.at.DATE + Age.x + Gender.x + Hba1c_baseline"
## [1] " + CALSBP + bmi + Smoking + Statin + log_Blood_TGA +"
## [1] " Total_cholesterol + egfr)"
## [1] ""
##
## Name Coefficient CI.L CI.R p.value p.adj
## 1 Myristoleic acid; 65 0.00824 0.00362 0.0129 0.000479 0.0359
## [1] ""
## [1] "Table: bmi"
## [1] " (from model: "
## [1] " ~ Amputation.at.DATE + Age.x + Gender.x + Hba1c_baseline"
## [1] " + CALSBP + bmi + Smoking + Statin + log_Blood_TGA +"
## [1] " Total_cholesterol + egfr)"
## [1] ""
##
## Name Coefficient CI.L CI.R p.value

```

```

## 1      Glutamic acid, 3TMS; 8      0.0457  0.025600  0.065900  8.97e-06
## 2  2-Hydroxybutyric acid, 2TMS; 2  0.0408  0.020600  0.060900  7.38e-05
## 3      Campesterol; 49            -0.0389 -0.059100 -0.018800  1.59e-04
## 4      Lactic acid; 29             0.0303  0.009860  0.050800  3.70e-03
## 5      Pyruvic acid; 31            -0.0300 -0.050500 -0.009560  4.05e-03
## 6      Decanoic acid; 52           -0.0295 -0.049800 -0.009130  4.54e-03
## 7      1,3-Propanediol; 34         -0.0291 -0.049700 -0.008540  5.57e-03
## 8      Arachidic acid; 46          -0.0289 -0.049300 -0.008360  5.81e-03
## 9      alpha-Tocopherol; 26        -0.0262 -0.046400 -0.006050  1.09e-02
## 10  2,4-Dihydroxybutanoic acid; 28 -0.0255 -0.045200 -0.005670  1.17e-02
## 11      Pyroglutamic acid; 69      -0.0248 -0.045200 -0.004420  1.71e-02
## 12      Ribitol; 70                0.0228  0.002320  0.043200  2.91e-02
## 13      Citric acid, 4TMS; 6       -0.0223 -0.042500 -0.002090  3.06e-02
## 14      Isoleucine, 2TMS; 18       0.0218  0.001660  0.041900  3.39e-02
## 15  alpha-ketoglutaric acid, TMS M -0.0221 -0.042600 -0.001550  3.50e-02
## 16      Tartronic acid; 73         -0.0215 -0.041800 -0.001260  3.74e-02
## 17      Nonadecanoic acid; 66      -0.0211 -0.041600 -0.000609  4.36e-02
## 18      11-Eicosenoic acid; 35     0.0211  0.000574  0.041600  4.39e-02
##      p.adj
## 1  0.000673
## 2  0.002770
## 3  0.003980
## 4  0.054500
## 5  0.054500
## 6  0.054500
## 7  0.054500
## 8  0.054500
## 9  0.087800
## 10 0.087800
## 11 0.117000
## 12 0.175000
## 13 0.175000
## 14 0.175000
## 15 0.175000
## 16 0.175000
## 17 0.183000
## 18 0.183000
## [1] ""
## [1] "Table: Smoking"
## [1] " (from model: "
## [1] " ~ Amputation.at.DATE + Age.x + Gender.x + Hba1c_baseline"
## [1] " + CALSBP + bmi + Smoking + Statin + log_Blood_TGA +"
## [1] " Total_cholesterol + egfr)"
## [1] ""
##
##      Name Coefficient  CI.L  CI.R  p.value  p.adj
## 1  Docosahexaenoic acid; 53  -0.381 -0.5710 -0.1910  8.86e-05  0.00408
## 2  3-Indolepropionic acid; 41  -0.378 -0.5700 -0.1860  1.18e-04  0.00408
## 3  Glutamic acid, 3TMS; 8      0.365  0.1760  0.5550  1.63e-04  0.00408
## 4  Tartronic acid; 73         -0.351 -0.5420 -0.1600  3.14e-04  0.00589
## 5  Glyceric acid; 30         -0.344 -0.5340 -0.1540  3.95e-04  0.00593
## 6  Valine, 2TMS; 20          -0.314 -0.5030 -0.1250  1.12e-03  0.01400
## 7  alpha-Tocopherol; 26       -0.306 -0.4960 -0.1170  1.57e-03  0.01690
## 8  Citric acid, 4TMS; 6       -0.268 -0.4590 -0.0780  5.74e-03  0.05040
## 9  Campesterol; 49           -0.266 -0.4560 -0.0762  6.05e-03  0.05040

```

```

## 10      Benzeneacetic acid; 47      -0.265 -0.4570 -0.0726 6.94e-03 0.05210
## 11      Leucine, 2TMS; 19          -0.244 -0.4340 -0.0530 1.23e-02 0.08380
## 12      Malic acid, 3TMS; 11       -0.239 -0.4320 -0.0468 1.49e-02 0.09290
## 13 3,4-Dihydroxybutanoic acid; 27   0.223  0.0356  0.4110 1.98e-02 0.11400
## 14      Ribitol; 70                0.218  0.0262  0.4110 2.60e-02 0.13900
## [1] ""
## [1] "Table: Statin"
## [1] " (from model: "
## [1] " ~ Amputation.at.DATE + Age.x + Gender.x + Hba1c_baseline"
## [1] " + CALSBP + bmi + Smoking + Statin + log_Blood_TGA +"
## [1] " Total_cholesterol + egfr)"
## [1] ""
##
##              Name Coefficient    CI.L    CI.R  p.value  p.adj
## 1      L-5-Oxoproline; 63      -0.313 -0.4880 -0.1380 0.000459 0.0344
## 2      Campesterol; 49         0.241  0.0687  0.4130 0.006140 0.1880
## 3      Glutamic acid, 3TMS; 8    0.225  0.0530  0.3970 0.010400 0.1880
## 4      Aminomalonic acid; 45     -0.225 -0.3990 -0.0514 0.011100 0.1880
## 5 Arachidonic acid, TMS; 24      0.223  0.0482  0.3990 0.012500 0.1880
## [1] ""
## [1] "Table: log_Blood_TGA"
## [1] " (from model: "
## [1] " ~ Amputation.at.DATE + Age.x + Gender.x + Hba1c_baseline"
## [1] " + CALSBP + bmi + Smoking + Statin + log_Blood_TGA +"
## [1] " Total_cholesterol + egfr)"
## [1] ""
##
##              Name Coefficient    CI.L    CI.R  p.value
## 1      Palmitic acid, TMS; 5      0.290  0.162000  0.419000 9.63e-06
## 2      Dodecanoic acid; 54        0.278  0.150000  0.407000 2.20e-05
## 3      Stearic acid, TMS; 2       0.275  0.146000  0.404000 2.88e-05
## 4      Octanoic acid; 68          0.262  0.133000  0.391000 6.89e-05
## 5      Decanoic acid; 52          0.261  0.132000  0.389000 7.01e-05
## 6      Arachidic acid; 46         0.249  0.120000  0.378000 1.61e-04
## 7 2-Hydroxybutyric acid, 2TMS; 2  0.226  0.099200  0.353000 4.87e-04
## 8      Oleic acid, TMS; 3         0.215  0.086300  0.344000 1.07e-03
## 9      Isoleucine, 2TMS; 18       0.202  0.075300  0.329000 1.81e-03
## 10     Valine, 2TMS; 20           0.199  0.072600  0.326000 2.06e-03
## 11     Arabinopyranose; 51        0.193  0.064300  0.322000 3.32e-03
## 12     Glyceryl-glycoside; 59     0.187  0.058500  0.315000 4.36e-03
## 13     Heptadecanoic acid; 60     0.180  0.050600  0.309000 6.41e-03
## 14     Lactic acid; 29            0.177  0.048400  0.306000 7.04e-03
## 15     Glutamic acid, 3TMS; 8     0.171  0.043600  0.298000 8.49e-03
## 16     Leucine, 2TMS; 19         0.168  0.040000  0.296000 1.01e-02
## 17     Heptadecanoic acid; 61     0.168  0.039200  0.298000 1.06e-02
## 18 3,4-Dihydroxybutanoic acid; 27 0.164  0.037600  0.289000 1.09e-02
## 19     Aminomalonic acid; 45     -0.165 -0.293000 -0.037000 1.16e-02
## 20     Pyruvic acid; 31           0.165  0.036100  0.294000 1.21e-02
## 21     Myristoleic acid; 65       0.161  0.033200  0.289000 1.37e-02
## 22 4-Hydroxybenzeneacetic acid; 4  0.156  0.030000  0.282000 1.53e-02
## 23     4-Hydroxybutanoic acid; 43 0.156  0.026300  0.285000 1.84e-02
## 24 alpha-ketoglutaric acid, TMS M 0.154  0.024500  0.283000 1.98e-02
## 25     Ribonic acid; 72          0.145  0.020000  0.270000 2.30e-02
## 26     Fumaric acid, 2TMS; 9      0.140  0.011300  0.269000 3.31e-02
## 27     Arachidonic acid, TMS; 24  0.139  0.009740  0.269000 3.51e-02
## 28     Proline, 2TMS; 21         0.135  0.006830  0.263000 3.90e-02

```

|       |                                |        |           |          |          |
|-------|--------------------------------|--------|-----------|----------|----------|
| ## 29 | Malic acid, 3TMS; 11           | 0.129  | -0.000308 | 0.258000 | 5.05e-02 |
| ## 30 | 3-Indolepropionic acid; 41     | -0.128 | -0.257000 | 0.000905 | 5.16e-02 |
| ## 31 | Succinic acid, 2TMS; 7         | 0.126  | -0.003570 | 0.255000 | 5.67e-02 |
| ## 32 | Nonadecanoic acid; 66          | 0.124  | -0.005350 | 0.253000 | 6.02e-02 |
| ## 33 | Ribitol; 71                    | 0.119  | -0.005960 | 0.243000 | 6.20e-02 |
| ## 34 | Tartronic acid; 73             | -0.122 | -0.250000 | 0.006200 | 6.22e-02 |
| ## 35 | Glycine, 3TMS; 17              | -0.121 | -0.249000 | 0.007080 | 6.41e-02 |
| ## 36 | Glyceric acid; 30              | -0.119 | -0.247000 | 0.007860 | 6.59e-02 |
| ## 37 | 1,3-Propanediol; 34            | 0.117  | -0.013000 | 0.246000 | 7.77e-02 |
| ## 38 | Tridecanoic acid; 74           | 0.114  | -0.015600 | 0.243000 | 8.49e-02 |
| ## 39 | 3-Hydroxybutyric acid, 2TMS; 1 | 0.114  | -0.015800 | 0.244000 | 8.52e-02 |
| ##    | p.adj                          |        |           |          |          |
| ## 1  | 0.00072                        |        |           |          |          |
| ## 2  | 0.00072                        |        |           |          |          |
| ## 3  | 0.00072                        |        |           |          |          |
| ## 4  | 0.00105                        |        |           |          |          |
| ## 5  | 0.00105                        |        |           |          |          |
| ## 6  | 0.00202                        |        |           |          |          |
| ## 7  | 0.00522                        |        |           |          |          |
| ## 8  | 0.01000                        |        |           |          |          |
| ## 9  | 0.01510                        |        |           |          |          |
| ## 10 | 0.01550                        |        |           |          |          |
| ## 11 | 0.02260                        |        |           |          |          |
| ## 12 | 0.02730                        |        |           |          |          |
| ## 13 | 0.03700                        |        |           |          |          |
| ## 14 | 0.03770                        |        |           |          |          |
| ## 15 | 0.04250                        |        |           |          |          |
| ## 16 | 0.04550                        |        |           |          |          |
| ## 17 | 0.04550                        |        |           |          |          |
| ## 18 | 0.04550                        |        |           |          |          |
| ## 19 | 0.04560                        |        |           |          |          |
| ## 20 | 0.04560                        |        |           |          |          |
| ## 21 | 0.04880                        |        |           |          |          |
| ## 22 | 0.05220                        |        |           |          |          |
| ## 23 | 0.06000                        |        |           |          |          |
| ## 24 | 0.06190                        |        |           |          |          |
| ## 25 | 0.06890                        |        |           |          |          |
| ## 26 | 0.09550                        |        |           |          |          |
| ## 27 | 0.09750                        |        |           |          |          |
| ## 28 | 0.10400                        |        |           |          |          |
| ## 29 | 0.12900                        |        |           |          |          |
| ## 30 | 0.12900                        |        |           |          |          |
| ## 31 | 0.13700                        |        |           |          |          |
| ## 32 | 0.13700                        |        |           |          |          |
| ## 33 | 0.13700                        |        |           |          |          |
| ## 34 | 0.13700                        |        |           |          |          |
| ## 35 | 0.13700                        |        |           |          |          |
| ## 36 | 0.13700                        |        |           |          |          |
| ## 37 | 0.15700                        |        |           |          |          |
| ## 38 | 0.16400                        |        |           |          |          |
| ## 39 | 0.16400                        |        |           |          |          |
| ##    | [1] ""                         |        |           |          |          |
| ##    | [1] "Table: Total_cholesterol" |        |           |          |          |
| ##    | [1] " (from model: "           |        |           |          |          |

```

## [1] " ~ Amputation.at.DATE + Age.x + Gender.x + Hba1c_baseline"
## [1] " + CALSBP + bmi + Smoking + Statin + log_Blood_TGA +"
## [1] " Total_cholesterol + egfr)"
## [1] ""
##
## Name Coefficient CI.L CI.R p.value
## 1 Cholesterol, TMS; 23 0.4510 0.3580 0.544000 5.10e-21
## 2 Campesterol; 49 0.3650 0.2700 0.459000 6.48e-14
## 3 alpha-Tocopherol; 26 0.3190 0.2240 0.414000 5.05e-11
## 4 Benzeneacetic acid; 47 -0.1880 -0.2840 -0.092100 1.23e-04
## 5 Linoleic acid, TMS; 4 0.1780 0.0826 0.274000 2.69e-04
## 6 4-Hydroxybutanoic acid; 43 -0.1750 -0.2710 -0.078700 3.72e-04
## 7 Proline, 2TMS; 21 -0.1730 -0.2680 -0.077400 3.88e-04
## 8 L-5-Oxoproline; 63 -0.1710 -0.2670 -0.074900 4.95e-04
## 9 Isoleucine, 2TMS; 18 -0.1680 -0.2620 -0.073400 5.03e-04
## 10 Glycine, 3TMS; 17 -0.1630 -0.2580 -0.067300 8.30e-04
## 11 Tyrosine; 75 -0.1560 -0.2520 -0.060300 1.43e-03
## 12 Methionine, 2TMS; 16 -0.1500 -0.2450 -0.054200 2.13e-03
## 13 2,4-Dihydroxybutanoic acid; 28 -0.1440 -0.2360 -0.050700 2.45e-03
## 14 Arabinopyranose; 51 -0.1470 -0.2430 -0.051300 2.63e-03
## 15 Threonine, 3TMS; 12 -0.1430 -0.2390 -0.046500 3.65e-03
## 16 Docosahexaenoic acid; 53 0.1380 0.0431 0.233000 4.39e-03
## 17 Eicosapentaenoic acid; 55 0.1360 0.0420 0.231000 4.66e-03
## 18 4-Hydroxybenzeneacetic acid; 4 -0.1330 -0.2270 -0.038800 5.65e-03
## 19 Alanine, 2TMS; 25 -0.1320 -0.2280 -0.036400 6.86e-03
## 20 Glyceryl-glycoside; 59 -0.1320 -0.2270 -0.036000 6.99e-03
## 21 2-Palmitoylglycerol; 39 0.1300 0.0340 0.227000 8.05e-03
## 22 Serine, 3TMS; 14 -0.1280 -0.2230 -0.031700 9.13e-03
## 23 Hydroxylamine; 62 -0.1210 -0.2170 -0.024600 1.39e-02
## 24 3-Indoleacetic acid; 40 -0.1180 -0.2130 -0.022800 1.52e-02
## 25 Ribitol; 71 -0.1100 -0.2030 -0.017700 1.96e-02
## 26 Phenylalanine, 2TMS; 13 -0.1110 -0.2070 -0.014600 2.40e-02
## 27 Pyruvic acid; 31 -0.1010 -0.1970 -0.005410 3.84e-02
## 28 Ribonic acid; 72 -0.0936 -0.1870 -0.000651 4.84e-02
## 29 3,4-Dihydroxybutanoic acid; 27 -0.0926 -0.1860 0.001050 5.26e-02
## 30 Malic acid, 3TMS; 11 -0.0948 -0.1910 0.001190 5.29e-02
## 31 Leucine, 2TMS; 19 -0.0928 -0.1880 0.002270 5.57e-02
## 32 Palmitic acid, TMS; 5 0.0915 -0.0039 0.187000 6.01e-02
## 33 Valine, 2TMS; 20 -0.0889 -0.1830 0.005320 6.44e-02
## 34 Ethanolamine; 56 -0.0860 -0.1820 0.010300 8.01e-02
##
## p.adj
## 1 3.82e-19
## 2 2.43e-12
## 3 1.26e-09
## 4 2.31e-03
## 5 4.03e-03
## 6 4.16e-03
## 7 4.16e-03
## 8 4.19e-03
## 9 4.19e-03
## 10 6.22e-03
## 11 9.78e-03
## 12 1.33e-02
## 13 1.41e-02
## 14 1.41e-02

```

```

## 15 1.83e-02
## 16 2.06e-02
## 17 2.06e-02
## 18 2.35e-02
## 19 2.62e-02
## 20 2.62e-02
## 21 2.87e-02
## 22 3.11e-02
## 23 4.53e-02
## 24 4.75e-02
## 25 5.88e-02
## 26 6.93e-02
## 27 1.07e-01
## 28 1.30e-01
## 29 1.32e-01
## 30 1.32e-01
## 31 1.35e-01
## 32 1.41e-01
## 33 1.46e-01
## 34 1.77e-01
## [1] ""
## [1] "Table: egfr"
## [1] " (from model: "
## [1] " ~ Amputation.at.DATE + Age.x + Gender.x + Hba1c_baseline"
## [1] " + CALSBP + bmi + Smoking + Statin + log_Blood_TGA +"
## [1] " Total_cholesterol + egfr)"
## [1] ""
##
## Name Coefficient CI.L CI.R p.value
## 1 Myo inositol 6TMS; 1 -0.01620 -0.019200 -0.013300 2.87e-26
## 2 Ribitol; 71 -0.01570 -0.018700 -0.012800 1.07e-24
## 3 Creatinine; 50 -0.01520 -0.018200 -0.012200 9.64e-23
## 4 2,4-Dihydroxybutanoic acid; 28 -0.01470 -0.017700 -0.011800 6.69e-22
## 5 Ribonic acid; 72 -0.01440 -0.017400 -0.011400 6.22e-21
## 6 3,4-Dihydroxybutanoic acid; 27 -0.01310 -0.016000 -0.010100 2.37e-17
## 7 4-Hydroxybenzeneacetic acid; 4 -0.01110 -0.014100 -0.008070 6.88e-13
## 8 4-Deoxytetrionic acid; 33 -0.01100 -0.014000 -0.007960 1.54e-12
## 9 4-Deoxytetrionic acid; 32 -0.01030 -0.013300 -0.007210 5.52e-11
## 10 2-Hydroxybutyric acid, 2TMS; 2 0.00959 0.006570 0.012600 5.84e-10
## 11 Isoleucine, 2TMS; 18 0.00957 0.006550 0.012600 6.12e-10
## 12 Valine, 2TMS; 20 0.00852 0.005510 0.011500 3.29e-08
## 13 Citric acid, 4TMS; 6 -0.00829 -0.011300 -0.005260 9.11e-08
## 14 Pyroglutamic acid; 69 -0.00786 -0.010900 -0.004800 4.95e-07
## 15 Hydroxyproline; 64 -0.00745 -0.010500 -0.004390 2.00e-06
## 16 3-Indoleacetic acid; 40 -0.00711 -0.010200 -0.004060 5.06e-06
## 17 Glyceryl-glycoside; 59 -0.00684 -0.009900 -0.003790 1.19e-05
## 18 4-Hydroxyphenyllactic acid; 44 -0.00611 -0.009170 -0.003060 9.10e-05
## 19 Serine, 3TMS; 14 0.00601 0.002950 0.009080 1.22e-04
## 20 Leucine, 2TMS; 19 0.00593 0.002890 0.008970 1.36e-04
## 21 Octanoic acid; 68 0.00597 0.002910 0.009040 1.37e-04
## 22 Stearic acid, TMS; 2 0.00575 0.002690 0.008810 2.36e-04
## 23 Methionine, 2TMS; 16 0.00521 0.002150 0.008260 8.35e-04
## 24 Glycine, 3TMS; 17 -0.00514 -0.008180 -0.002100 9.44e-04
## 25 Fumaric acid, 2TMS; 9 -0.00497 -0.008040 -0.001900 1.51e-03
## 26 Tyrosine; 75 0.00484 0.001770 0.007910 2.01e-03

```

|       |                               |          |           |           |          |
|-------|-------------------------------|----------|-----------|-----------|----------|
| ## 27 | Eicosapentaenoic acid; 55     | 0.00442  | 0.001400  | 0.007440  | 4.10e-03 |
| ## 28 | 2-hydroxy Isovaleric acid; 38 | 0.00445  | 0.001380  | 0.007520  | 4.53e-03 |
| ## 29 | Glycerol; 57                  | 0.00432  | 0.001240  | 0.007390  | 6.02e-03 |
| ## 30 | Palmitic acid, TMS; 5         | 0.00425  | 0.001200  | 0.007310  | 6.29e-03 |
| ## 31 | Cholesterol, TMS; 23          | 0.00405  | 0.001080  | 0.007030  | 7.52e-03 |
| ## 32 | Malic acid, 3TMS; 11          | -0.00395 | -0.007020 | -0.000881 | 1.17e-02 |
| ## 33 | Benzeneacetic acid; 47        | -0.00383 | -0.006890 | -0.000768 | 1.43e-02 |
| ## 34 | Docosahexaenoic acid; 53      | 0.00370  | 0.000666  | 0.006730  | 1.69e-02 |
| ## 35 | Glyceric acid; 30             | 0.00346  | 0.000428  | 0.006480  | 2.53e-02 |
| ## 36 | Alanine, 2TMS; 25             | -0.00335 | -0.006410 | -0.000283 | 3.23e-02 |
| ## 37 | Glycerol; 58                  | -0.00318 | -0.006270 | -0.000084 | 4.41e-02 |
| ##    | p.adj                         |          |           |           |          |
| ## 1  | 2.15e-24                      |          |           |           |          |
| ## 2  | 4.00e-23                      |          |           |           |          |
| ## 3  | 2.41e-21                      |          |           |           |          |
| ## 4  | 1.25e-20                      |          |           |           |          |
| ## 5  | 9.33e-20                      |          |           |           |          |
| ## 6  | 2.96e-16                      |          |           |           |          |
| ## 7  | 7.37e-12                      |          |           |           |          |
| ## 8  | 1.44e-11                      |          |           |           |          |
| ## 9  | 4.60e-10                      |          |           |           |          |
| ## 10 | 4.17e-09                      |          |           |           |          |
| ## 11 | 4.17e-09                      |          |           |           |          |
| ## 12 | 2.05e-07                      |          |           |           |          |
| ## 13 | 5.25e-07                      |          |           |           |          |
| ## 14 | 2.65e-06                      |          |           |           |          |
| ## 15 | 1.00e-05                      |          |           |           |          |
| ## 16 | 2.37e-05                      |          |           |           |          |
| ## 17 | 5.24e-05                      |          |           |           |          |
| ## 18 | 3.79e-04                      |          |           |           |          |
| ## 19 | 4.81e-04                      |          |           |           |          |
| ## 20 | 4.89e-04                      |          |           |           |          |
| ## 21 | 4.89e-04                      |          |           |           |          |
| ## 22 | 8.06e-04                      |          |           |           |          |
| ## 23 | 2.72e-03                      |          |           |           |          |
| ## 24 | 2.95e-03                      |          |           |           |          |
| ## 25 | 4.54e-03                      |          |           |           |          |
| ## 26 | 5.79e-03                      |          |           |           |          |
| ## 27 | 1.14e-02                      |          |           |           |          |
| ## 28 | 1.21e-02                      |          |           |           |          |
| ## 29 | 1.56e-02                      |          |           |           |          |
| ## 30 | 1.57e-02                      |          |           |           |          |
| ## 31 | 1.82e-02                      |          |           |           |          |
| ## 32 | 2.74e-02                      |          |           |           |          |
| ## 33 | 3.24e-02                      |          |           |           |          |
| ## 34 | 3.72e-02                      |          |           |           |          |
| ## 35 | 5.42e-02                      |          |           |           |          |
| ## 36 | 6.73e-02                      |          |           |           |          |
| ## 37 | 8.94e-02                      |          |           |           |          |



### 5.1.3.3 Table with All Metabolites

```

## [1] ""
## [1] "Table: Amputation.at.DATEJA"
## [1] " (from model: "
## [1] " ~ Amputation.at.DATE + Age.x + Gender.x + Hba1c_baseline"
## [1] " + CALSBP + bmi + Smoking + Statin + log_Blood_TGA +"
## [1] " Total_cholesterol + egfr)"
## [1] ""
##
## Name Coefficient CI.L CI.R p.value p.adj
## 1 Succinic acid, 2TMS; 7 0.5490 0.1240 0.9730 0.0113 0.450
## 2 Glycerol; 57 0.5330 0.1070 0.9590 0.0141 0.450
## 3 Threonine, 3TMS; 12 -0.5130 -0.9380 -0.0880 0.0180 0.450
## 4 Phenylalanine, 2TMS; 13 -0.4800 -0.9060 -0.0545 0.0270 0.507
## 5 Glutamic acid, 3TMS; 8 -0.4460 -0.8640 -0.0287 0.0362 0.543
## 6 Ribonic acid; 72 0.3940 -0.0174 0.8050 0.0605 0.756
## 7 Stearic acid, TMS; 2 0.3580 -0.0647 0.7820 0.0968 0.861
## 8 Tyrosine; 75 -0.3440 -0.7680 0.0804 0.1120 0.861
## 9 Proline, 2TMS; 21 -0.3240 -0.7450 0.0977 0.1320 0.861
## 10 Heptadecanoic acid; 61 0.3250 -0.0999 0.7490 0.1340 0.861
## 11 2-Hydroxybutyric acid, 2TMS; 2 0.3190 -0.0988 0.7360 0.1340 0.861
## 12 Methionine, 2TMS; 16 -0.3190 -0.7410 0.1020 0.1380 0.861
## 13 Myristoleic acid; 65 0.2980 -0.1240 0.7190 0.1660 0.863
## 14 Dodecanoic acid; 54 0.2860 -0.1360 0.7080 0.1840 0.863
## 15 4-Hydroxybutanoic acid; 43 0.2770 -0.1480 0.7020 0.2020 0.863
## 16 4-Hydroxybenzeneacetic acid; 4 0.2680 -0.1470 0.6830 0.2050 0.863
## 17 Campesterol; 49 -0.2690 -0.6870 0.1500 0.2080 0.863
## 18 Arabinopyranose; 51 -0.2690 -0.6930 0.1540 0.2130 0.863
## 19 Malic acid, 3TMS; 11 0.2580 -0.1660 0.6820 0.2330 0.863
## 20 Aminomalonic acid; 45 -0.2460 -0.6670 0.1760 0.2530 0.863
## 21 Pyroglutamic acid; 69 0.2460 -0.1760 0.6680 0.2540 0.863
## 22 Myo inositol 6TMS; 1 0.2380 -0.1710 0.6460 0.2540 0.863
## 23 Leucine, 2TMS; 19 -0.2260 -0.6460 0.1950 0.2930 0.863
## 24 Palmitic acid, TMS; 5 0.2210 -0.2010 0.6430 0.3040 0.863
## 25 Hydroxyproline; 64 0.2210 -0.2020 0.6450 0.3050 0.863
## 26 4-Hydroxyphenyllactic acid; 44 0.2170 -0.2060 0.6390 0.3150 0.863
## 27 Octanoic acid; 68 0.2160 -0.2080 0.6400 0.3180 0.863
## 28 3-Indolepropionic acid; 41 -0.2140 -0.6370 0.2100 0.3220 0.863
## 29 Decanoic acid; 52 0.1880 -0.2340 0.6100 0.3820 0.940
## 30 Heptadecanoic acid; 60 0.1860 -0.2390 0.6100 0.3920 0.940
## 31 2-hydroxy Isovaleric acid; 38 -0.1810 -0.6060 0.2430 0.4020 0.940
## 32 Valine, 2TMS; 20 -0.1760 -0.5930 0.2400 0.4060 0.940
## 33 Tridecanoic acid; 74 0.1720 -0.2530 0.5970 0.4280 0.940
## 34 Serine, 3TMS; 14 -0.1680 -0.5920 0.2550 0.4360 0.940
## 35 2-Palmitoylglycerol; 39 -0.1570 -0.5830 0.2690 0.4690 0.940
## 36 Hydroxylamine; 62 0.1490 -0.2760 0.5750 0.4920 0.940
## 37 11-Eicosenoic acid; 35 0.1450 -0.2800 0.5700 0.5040 0.940
## 38 Alanine, 2TMS; 25 0.1380 -0.2860 0.5620 0.5220 0.940
## 39 1-Monopalmitin; 37 0.1290 -0.2970 0.5560 0.5520 0.940
## 40 Arachidic acid; 46 0.1200 -0.3050 0.5440 0.5810 0.940
## 41 1-Dodecanol; 36 0.1200 -0.3070 0.5460 0.5820 0.940
## 42 Lactic acid; 29 0.1190 -0.3050 0.5430 0.5820 0.940
## 43 Citric acid, 4TMS; 6 -0.1170 -0.5360 0.3020 0.5840 0.940
## 44 Tartronic acid; 73 -0.1140 -0.5340 0.3060 0.5950 0.940

```

|       |                                |         |         |        |        |       |
|-------|--------------------------------|---------|---------|--------|--------|-------|
| ## 45 | Creatinine; 50                 | 0.1110  | -0.3040 | 0.5260 | 0.6000 | 0.940 |
| ## 46 | Cholesterol, TMS; 23           | 0.1030  | -0.3080 | 0.5140 | 0.6230 | 0.940 |
| ## 47 | Ribitol; 70                    | 0.0993  | -0.3240 | 0.5230 | 0.6460 | 0.940 |
| ## 48 | Ribitol; 71                    | 0.0928  | -0.3170 | 0.5030 | 0.6570 | 0.940 |
| ## 49 | alpha-Tocopherol; 26           | -0.0892 | -0.5080 | 0.3290 | 0.6760 | 0.940 |
| ## 50 | Eicosapentaenoic acid; 55      | -0.0880 | -0.5050 | 0.3290 | 0.6790 | 0.940 |
| ## 51 | Glycine, 3TMS; 17              | -0.0863 | -0.5070 | 0.3340 | 0.6880 | 0.940 |
| ## 52 | 3,4-Dihydroxybutanoic acid; 27 | 0.0756  | -0.3380 | 0.4890 | 0.7200 | 0.940 |
| ## 53 | alpha-ketoglutaric acid, TMS M | -0.0685 | -0.4940 | 0.3570 | 0.7520 | 0.940 |
| ## 54 | Benzeneacetic acid; 47         | -0.0680 | -0.4910 | 0.3550 | 0.7530 | 0.940 |
| ## 55 | Docosahexaenoic acid; 53       | 0.0652  | -0.3540 | 0.4840 | 0.7600 | 0.940 |
| ## 56 | Ethanolamine; 56               | 0.0659  | -0.3600 | 0.4920 | 0.7610 | 0.940 |
| ## 57 | Oleic acid, TMS; 3             | 0.0644  | -0.3590 | 0.4880 | 0.7650 | 0.940 |
| ## 58 | Arachidonic acid, TMS; 24      | 0.0647  | -0.3610 | 0.4900 | 0.7660 | 0.940 |
| ## 59 | Isoleucine, 2TMS; 18           | 0.0614  | -0.3560 | 0.4790 | 0.7730 | 0.940 |
| ## 60 | Nonadecanoic acid; 66          | 0.0616  | -0.3640 | 0.4870 | 0.7760 | 0.940 |
| ## 61 | 3-Indoleacetic acid; 40        | -0.0557 | -0.4770 | 0.3660 | 0.7960 | 0.940 |
| ## 62 | Glyceric acid; 30              | -0.0480 | -0.4670 | 0.3710 | 0.8220 | 0.940 |
| ## 63 | 4-Deoxytetronic acid; 32       | 0.0477  | -0.3740 | 0.4700 | 0.8250 | 0.940 |
| ## 64 | 2,4-Dihydroxybutanoic acid; 28 | 0.0461  | -0.3640 | 0.4560 | 0.8260 | 0.940 |
| ## 65 | Pyruvic acid; 31               | 0.0475  | -0.3770 | 0.4720 | 0.8260 | 0.940 |
| ## 66 | Linoleic acid, TMS; 4          | 0.0420  | -0.3820 | 0.4660 | 0.8460 | 0.940 |
| ## 67 | Nonanoic acid; 67              | 0.0415  | -0.3850 | 0.4680 | 0.8480 | 0.940 |
| ## 68 | 4-Deoxytetronic acid; 33       | 0.0329  | -0.3860 | 0.4510 | 0.8770 | 0.940 |
| ## 69 | Glyceryl-glycoside; 59         | 0.0317  | -0.3910 | 0.4540 | 0.8830 | 0.940 |
| ## 70 | Bisphenol A; 48                | -0.0301 | -0.4580 | 0.3970 | 0.8900 | 0.940 |
| ## 71 | 3-Hydroxybutyric acid, 2TMS; 1 | 0.0279  | -0.3990 | 0.4550 | 0.8980 | 0.940 |
| ## 72 | 1,3-Propanediol; 34            | 0.0266  | -0.4000 | 0.4530 | 0.9030 | 0.940 |
| ## 73 | Glycerol; 58                   | -0.0203 | -0.4480 | 0.4070 | 0.9260 | 0.946 |
| ## 74 | Fumaric acid, 2TMS; 9          | -0.0180 | -0.4420 | 0.4070 | 0.9340 | 0.946 |
| ## 75 | L-5-Oxoproline; 63             | -0.0130 | -0.4380 | 0.4120 | 0.9520 | 0.952 |

#### 5.1.4 Fully-Adjusted Model

```
## [1] "Fitting models:"  
## [1] "~ Amputation.at.DATE + Age.x + Gender.x + Hba1c_baseline + CALSBP + bmi + Smoking + Statin + lo  
## [1] ""
```

#### 5.1.4.1 Forest Plot of Model Coefficients

```
## Warning: Ignoring unknown aesthetics: x
## NULL
```

#### 5.1.4.2 Tables of Model Coefficients

```

## [1] ""
## [1] "Table: Amputation.at.DATEJA"
## [1] " (from model: "
## [1] " ~ Amputation.at.DATE + Age.x + Gender.x + Hba1c_baseline"
## [1] " + CALSBP + bmi + Smoking + Statin + log_Blood_TGA +"
## [1] " Total_cholesterol + egfr + logUAER)"
## [1] ""
## [1] "No significant associations at p.adj < 0.2"
## [1] ""
## [1] "Table: Age.x"
## [1] " (from model: "
## [1] " ~ Amputation.at.DATE + Age.x + Gender.x + Hba1c_baseline"
## [1] " + CALSBP + bmi + Smoking + Statin + log_Blood_TGA +"
## [1] " Total_cholesterol + egfr + logUAER)"
## [1] ""
##
## Name Coefficient CI.L CI.R p.value
## 1 Eicosapentaenoic acid; 55 0.02550 1.82e-02 0.032900 1.40e-11
## 2 Docosahexaenoic acid; 53 0.01380 6.44e-03 0.021200 2.51e-04
## 3 alpha-ketoglutaric acid, TMS M 0.01270 5.16e-03 0.020200 9.69e-04
## 4 Pyruvic acid; 31 0.01190 4.42e-03 0.019400 1.87e-03
## 5 alpha-Tocopherol; 26 0.01120 3.84e-03 0.018600 2.90e-03
## 6 Malic acid, 3TMS; 11 0.01070 3.22e-03 0.018200 5.10e-03
## 7 Palmitic acid, TMS; 5 0.01060 3.19e-03 0.018100 5.18e-03
## 8 Decanoic acid; 52 0.01060 3.11e-03 0.018100 5.52e-03
## 9 3-Indoleacetic acid; 40 0.01000 2.60e-03 0.017500 8.19e-03
## 10 Nonadecanoic acid; 66 0.01000 2.51e-03 0.017600 9.00e-03
## 11 4-Hydroxybenzeneacetic acid; 4 0.00951 2.19e-03 0.016800 1.10e-02
## 12 Glyceric acid; 30 0.00940 2.02e-03 0.016800 1.26e-02
## 13 Ribitol; 70 0.00921 1.71e-03 0.016700 1.62e-02
## 14 Oleic acid, TMS; 3 0.00915 1.66e-03 0.016600 1.67e-02
## 15 Myristoleic acid; 65 0.00879 1.33e-03 0.016200 2.10e-02
## 16 Glutamic acid, 3TMS; 8 0.00851 1.15e-03 0.015900 2.35e-02
## 17 Succinic acid, 2TMS; 7 0.00819 6.81e-04 0.015700 3.25e-02
## 18 2,4-Dihydroxybutanoic acid; 28 0.00780 5.96e-04 0.015000 3.38e-02
## 19 11-Eicosenoic acid; 35 0.00798 4.38e-04 0.015500 3.81e-02
## 20 Fumaric acid, 2TMS; 9 0.00782 3.19e-04 0.015300 4.10e-02
## 21 Stearic acid, TMS; 2 0.00780 3.04e-04 0.015300 4.14e-02
## 22 Tyrosine; 75 0.00775 2.46e-04 0.015200 4.30e-02
## 23 Tartronic acid; 73 0.00756 1.32e-04 0.015000 4.61e-02
## 24 Heptadecanoic acid; 61 0.00750 -2.12e-05 0.015000 5.06e-02
## 25 Alanine, 2TMS; 25 0.00745 -4.02e-05 0.014900 5.12e-02
## 26 Dodecanoic acid; 54 0.00703 -4.51e-04 0.014500 6.55e-02
## 27 Myo inositol 6TMS; 1 0.00665 -5.10e-04 0.013800 6.87e-02
## 28 Hydroxylamine; 62 -0.00699 -1.45e-02 0.000554 6.93e-02
## 29 Glycerol; 57 0.00697 -5.66e-04 0.014500 6.98e-02
##
## p.adj
## 1 1.05e-09
## 2 9.43e-03
## 3 2.42e-02
## 4 3.51e-02
## 5 4.36e-02
## 6 5.18e-02

```

```

## 7 5.18e-02
## 8 5.18e-02
## 9 6.75e-02
## 10 6.75e-02
## 11 7.48e-02
## 12 7.88e-02
## 13 8.93e-02
## 14 8.93e-02
## 15 1.05e-01
## 16 1.10e-01
## 17 1.41e-01
## 18 1.41e-01
## 19 1.46e-01
## 20 1.46e-01
## 21 1.46e-01
## 22 1.46e-01
## 23 1.50e-01
## 24 1.54e-01
## 25 1.54e-01
## 26 1.81e-01
## 27 1.81e-01
## 28 1.81e-01
## 29 1.81e-01
## [1] ""
## [1] "Table: Gender.x"
## [1] " (from model: "
## [1] " ~ Amputation.at.DATE + Age.x + Gender.x + Hba1c_baseline"
## [1] " + CALSBP + bmi + Smoking + Statin + log_Blood_TGA +"
## [1] " Total_cholesterol + egfr + logUAER)"
## [1] ""
##
## Name Coefficient CI.L CI.R p.value
## 1 4-Deoxytetrionic acid; 33 0.404 0.23900 0.56900 1.64e-06
## 2 Tartronic acid; 73 -0.383 -0.54900 -0.21700 6.63e-06
## 3 Proline, 2TMS; 21 0.370 0.20400 0.53600 1.37e-05
## 4 Methionine, 2TMS; 16 0.369 0.20200 0.53500 1.49e-05
## 5 Glyceric acid; 30 -0.363 -0.52900 -0.19800 1.67e-05
## 6 Myristoleic acid; 65 -0.363 -0.53000 -0.19700 2.04e-05
## 7 Valine, 2TMS; 20 0.342 0.17800 0.50600 4.48e-05
## 8 Leucine, 2TMS; 19 0.319 0.15300 0.48500 1.67e-04
## 9 Cholesterol, TMS; 23 -0.306 -0.46800 -0.14400 2.13e-04
## 10 Oleic acid, TMS; 3 -0.302 -0.46900 -0.13400 4.20e-04
## 11 Dodecanoic acid; 54 -0.300 -0.46800 -0.13300 4.34e-04
## 12 Citric acid, 4TMS; 6 -0.285 -0.45000 -0.11900 7.49e-04
## 13 Glycine, 3TMS; 17 -0.277 -0.44400 -0.11100 1.10e-03
## 14 Isoleucine, 2TMS; 18 0.265 0.10000 0.43000 1.63e-03
## 15 Hydroxyproline; 64 0.259 0.09190 0.42700 2.43e-03
## 16 2-hydroxy Isovaleric acid; 38 0.258 0.09060 0.42600 2.56e-03
## 17 Stearic acid, TMS; 2 -0.256 -0.42400 -0.08900 2.71e-03
## 18 Decanoic acid; 52 -0.255 -0.42200 -0.08800 2.79e-03
## 19 Docosahexaenoic acid; 53 -0.248 -0.41300 -0.08260 3.31e-03
## 20 Aminomalonic acid; 45 -0.245 -0.41100 -0.07820 3.98e-03
## 21 Succinic acid, 2TMS; 7 -0.242 -0.41000 -0.07460 4.66e-03
## 22 Glutamic acid, 3TMS; 8 0.237 0.07200 0.40100 4.88e-03
## 23 Palmitic acid, TMS; 5 -0.229 -0.39600 -0.06200 7.21e-03

```

```

## 24      Tridecanoic acid; 74      -0.226 -0.39500 -0.05820 8.37e-03
## 25      Heptadecanoic acid; 61    -0.212 -0.38000 -0.04370 1.35e-02
## 26      Nonadecanoic acid; 66     -0.207 -0.37600 -0.03930 1.56e-02
## 27      Heptadecanoic acid; 60    -0.194 -0.36200 -0.02620 2.35e-02
## 28              Glycerol; 57      -0.181 -0.35000 -0.01250 3.52e-02
## 29              Tyrosine; 75       -0.173 -0.34100 -0.00516 4.34e-02
## 30      Benzeneacetic acid; 47     -0.163 -0.33000  0.00449 5.65e-02
## 31              1-Monopalmitin; 37  0.161 -0.00795  0.33000 6.18e-02
## 32      Arachidonic acid, TMS; 24  -0.148 -0.31600  0.02010 8.44e-02

```

```
##      p.adj
```

```

## 1  0.000123
## 2  0.000249
## 3  0.000250
## 4  0.000250
## 5  0.000250
## 6  0.000255
## 7  0.000480
## 8  0.001570
## 9  0.001780
## 10 0.002960
## 11 0.002960
## 12 0.004680
## 13 0.006320
## 14 0.008750
## 15 0.011600
## 16 0.011600
## 17 0.011600
## 18 0.011600
## 19 0.013100
## 20 0.014900
## 21 0.016600
## 22 0.016600
## 23 0.023500
## 24 0.026200
## 25 0.040600
## 26 0.045100
## 27 0.065400
## 28 0.094400
## 29 0.112000
## 30 0.141000
## 31 0.149000
## 32 0.198000

```

```
## [1] ""
```

```
## [1] "Table: Hba1c_baseline"
```

```
## [1] " (from model: "
```

```
## [1] " ~ Amputation.at.DATE + Age.x + Gender.x + Hba1c_baseline"
```

```
## [1] " + CALSBP + bmi + Smoking + Statin + log_Blood_TGA +"
```

```
## [1] " Total_cholesterol + egfr + logUAER)"
```

```
## [1] ""
```

```

##      Name Coefficient      CI.L      CI.R p.value p.adj
## 1      Valine, 2TMS; 20      0.1340 0.06100 0.20700 0.000331 0.0129
## 2      Ethanolamine; 56      0.1350 0.05950 0.21000 0.000451 0.0129
## 3      Arabinopyranose; 51    0.1300 0.05510 0.20400 0.000672 0.0129
## 4      Alanine, 2TMS; 25      0.1280 0.05340 0.20300 0.000790 0.0129

```

```

## 5  Eicosapentaenoic acid; 55  -0.1250 -0.19800 -0.05150 0.000859 0.0129
## 6  Docosahexaenoic acid; 53  -0.1110 -0.18500 -0.03740 0.003160 0.0395
## 7  Citric acid, 4TMS; 6      0.1090  0.03510  0.18300 0.003840 0.0411
## 8  4-Hydroxybutanoic acid; 43 -0.0976 -0.17300 -0.02250 0.010900 0.0874
## 9  Decanoic acid; 52        -0.0961 -0.17100 -0.02160 0.011500 0.0874
## 10 Glyceric acid; 30        -0.0941 -0.16800 -0.02050 0.012200 0.0874
## 11 Tridecanoic acid; 74     -0.0953 -0.17000 -0.02030 0.012800 0.0874
## 12 Campesterol; 49          0.0866  0.01310  0.16000 0.020900 0.1310
## 13 Glyceryl-glycoside; 59    0.0836  0.00918  0.15800 0.027700 0.1510
## 14 Lactic acid; 29           0.0826  0.00791  0.15700 0.030200 0.1510
## 15 Leucine, 2TMS; 19        0.0819  0.00783  0.15600 0.030200 0.1510
## 16 4-Deoxytetronic acid; 33  -0.0778 -0.15100 -0.00433 0.038000 0.1690
## 17 Myristoleic acid; 65     -0.0786 -0.15300 -0.00426 0.038300 0.1690
## 18 Ribitol; 70              -0.0780 -0.15300 -0.00323 0.040900 0.1700
## [1] ""
## [1] "Table: CALSBP"
## [1] " (from model: "
## [1] " ~ Amputation.at.DATE + Age.x + Gender.x + Hba1c_baseline"
## [1] " + CALSBP + bmi + Smoking + Statin + log_Blood_TGA +"
## [1] " Total_cholesterol + egfr + logUAER)"
## [1] ""
##
## Name Coefficient CI.L CI.R p.value p.adj
## 1 Myristoleic acid; 65 0.00797 0.00306 0.0129 0.00148 0.111
## [1] ""
## [1] "Table: bmi"
## [1] " (from model: "
## [1] " ~ Amputation.at.DATE + Age.x + Gender.x + Hba1c_baseline"
## [1] " + CALSBP + bmi + Smoking + Statin + log_Blood_TGA +"
## [1] " Total_cholesterol + egfr + logUAER)"
## [1] ""
##
## Name Coefficient CI.L CI.R p.value
## 1 Glutamic acid, 3TMS; 8 0.0446 0.02410 0.065100 2.14e-05
## 2 2-Hydroxybutyric acid, 2TMS; 2 0.0423 0.02180 0.062800 5.41e-05
## 3 Campesterol; 49 -0.0400 -0.06060 -0.019500 1.34e-04
## 4 Decanoic acid; 52 -0.0354 -0.05620 -0.014600 8.63e-04
## 5 Lactic acid; 29 0.0299 0.00899 0.050700 5.07e-03
## 6 2,4-Dihydroxybutanoic acid; 28 -0.0279 -0.04790 -0.007820 6.48e-03
## 7 1,3-Propanediol; 34 -0.0291 -0.05010 -0.008120 6.61e-03
## 8 Pyruvic acid; 31 -0.0288 -0.04980 -0.007930 6.91e-03
## 9 alpha-Tocopherol; 26 -0.0274 -0.04790 -0.006820 9.07e-03
## 10 Arachidic acid; 46 -0.0275 -0.04850 -0.006620 9.91e-03
## 11 Nonadecanoic acid; 66 -0.0256 -0.04650 -0.004660 1.66e-02
## 12 Pyroglutamic acid; 69 -0.0254 -0.04620 -0.004600 1.67e-02
## 13 Citric acid, 4TMS; 6 -0.0247 -0.04530 -0.004090 1.88e-02
## 14 Dodecanoic acid; 54 -0.0237 -0.04450 -0.002910 2.55e-02
## 15 11-Eicosenoic acid; 35 0.0236 0.00265 0.044600 2.73e-02
## 16 Isoleucine, 2TMS; 18 0.0225 0.00204 0.043000 3.12e-02
## 17 alpha-ketoglutaric acid, TMS M -0.0229 -0.04390 -0.001980 3.20e-02
## 18 Tartronic acid; 73 -0.0224 -0.04310 -0.001680 3.41e-02
## 19 Glycine, 3TMS; 17 -0.0219 -0.04260 -0.001210 3.81e-02
## 20 Ribitol; 70 0.0221 0.00121 0.043000 3.82e-02
## 21 Octanoic acid; 68 -0.0204 -0.04130 0.000426 5.49e-02
##
## p.adj
## 1 0.00161

```



```

## 2 0.00203
## 3 0.00336
## 4 0.01620
## 5 0.06470
## 6 0.06470
## 7 0.06470
## 8 0.06470
## 9 0.07440
## 10 0.07440
## 11 0.10400
## 12 0.10400
## 13 0.10900
## 14 0.13600
## 15 0.13600
## 16 0.14100
## 17 0.14100
## 18 0.14200
## 19 0.14300
## 20 0.14300
## 21 0.19600
## [1] ""
## [1] "Table: Smoking"
## [1] " (from model: "
## [1] " ~ Amputation.at.DATE + Age.x + Gender.x + Hba1c_baseline"
## [1] " + CALSBP + bmi + Smoking + Statin + log_Blood_TGA +"
## [1] " Total_cholesterol + egfr + logUAER)"
## [1] ""
##
## Name Coefficient CI.L CI.R p.value p.adj
## 1 3-Indolepropionic acid; 41 -0.357 -0.556 -0.1580 0.000437 0.0201
## 2 Tartronic acid; 73 -0.340 -0.538 -0.1430 0.000739 0.0201
## 3 Docosahexaenoic acid; 53 -0.336 -0.532 -0.1400 0.000806 0.0201
## 4 Glutamic acid, 3TMS; 8 0.323 0.127 0.5190 0.001220 0.0229
## 5 Valine, 2TMS; 20 -0.311 -0.505 -0.1160 0.001800 0.0270
## 6 alpha-Tocopherol; 26 -0.297 -0.493 -0.1010 0.003020 0.0333
## 7 Glyceric acid; 30 -0.296 -0.492 -0.1000 0.003110 0.0333
## 8 Benzeneacetic acid; 47 -0.265 -0.464 -0.0661 0.009060 0.0750
## 9 Citric acid, 4TMS; 6 -0.261 -0.458 -0.0644 0.009300 0.0750
## 10 Leucine, 2TMS; 19 -0.259 -0.457 -0.0621 0.010000 0.0750
## 11 Malic acid, 3TMS; 11 -0.253 -0.452 -0.0537 0.012800 0.0876
## 12 Ribonic acid; 72 -0.233 -0.425 -0.0417 0.017000 0.1060
## 13 Campesterol; 49 -0.234 -0.430 -0.0387 0.018900 0.1090
## [1] ""
## [1] "Table: Statin"
## [1] " (from model: "
## [1] " ~ Amputation.at.DATE + Age.x + Gender.x + Hba1c_baseline"
## [1] " + CALSBP + bmi + Smoking + Statin + log_Blood_TGA +"
## [1] " Total_cholesterol + egfr + logUAER)"
## [1] ""
##
## Name Coefficient CI.L CI.R p.value p.adj
## 1 Campesterol; 49 0.289 0.1070 0.4710 0.00187 0.0888
## 2 L-5-Oxoproline; 63 -0.281 -0.4660 -0.0951 0.00305 0.0888
## 3 Arachidonic acid, TMS; 24 0.276 0.0907 0.4620 0.00355 0.0888
## [1] ""
## [1] "Table: log_Blood_TGA"

```

```

## [1] " (from model: "
## [1] " ~ Amputation.at.DATE + Age.x + Gender.x + Hba1c_baseline"
## [1] " + CALSBP + bmi + Smoking + Statin + log_Blood_TGA +"
## [1] " Total_cholesterol + egfr + logUAER)"
## [1] ""
##
## Name Coefficient CI.L CI.R p.value
## 1 Palmitic acid, TMS; 5 0.281 0.149000 0.41300 2.97e-05
## 2 Octanoic acid; 68 0.266 0.134000 0.39800 8.16e-05
## 3 Arachidic acid; 46 0.262 0.130000 0.39500 1.09e-04
## 4 Dodecanoic acid; 54 0.261 0.129000 0.39300 1.09e-04
## 5 Stearic acid, TMS; 2 0.258 0.126000 0.39100 1.31e-04
## 6 2-Hydroxybutyric acid, 2TMS; 2 0.237 0.107000 0.36700 3.57e-04
## 7 Decanoic acid; 52 0.239 0.107000 0.37100 3.86e-04
## 8 Oleic acid, TMS; 3 0.213 0.080400 0.34500 1.64e-03
## 9 Lactic acid; 29 0.196 0.064000 0.32900 3.66e-03
## 10 Glyceryl-glycoside; 59 0.190 0.058200 0.32200 4.75e-03
## 11 Isoleucine, 2TMS; 18 0.187 0.056900 0.31700 4.85e-03
## 12 Valine, 2TMS; 20 0.186 0.056500 0.31500 4.91e-03
## 13 Heptadecanoic acid; 60 0.180 0.046800 0.31200 8.07e-03
## 14 Arabinopyranose; 51 0.173 0.041200 0.30600 1.02e-02
## 15 4-Hydroxybenzeneacetic acid; 4 0.166 0.036900 0.29600 1.18e-02
## 16 Myristoleic acid; 65 0.163 0.031200 0.29400 1.53e-02
## 17 Aminomalonic acid; 45 -0.161 -0.293000 -0.03000 1.61e-02
## 18 Ribonic acid; 72 0.155 0.028000 0.28300 1.68e-02
## 19 alpha-ketoglutaric acid, TMS M 0.161 0.028100 0.29400 1.76e-02
## 20 Glutamic acid, 3TMS; 8 0.157 0.027300 0.28700 1.78e-02
## 21 Pyruvic acid; 31 0.160 0.027300 0.29300 1.81e-02
## 22 3,4-Dihydroxybutanoic acid; 27 0.153 0.025000 0.28100 1.92e-02
## 23 Leucine, 2TMS; 19 0.156 0.024800 0.28700 1.98e-02
## 24 Fumaric acid, 2TMS; 9 0.154 0.021700 0.28600 2.26e-02
## 25 Heptadecanoic acid; 61 0.154 0.021100 0.28600 2.32e-02
## 26 Arachidonic acid, TMS; 24 0.149 0.016100 0.28200 2.80e-02
## 27 Malic acid, 3TMS; 11 0.139 0.006890 0.27100 3.92e-02
## 28 Nonadecanoic acid; 66 0.137 0.004320 0.27000 4.30e-02
## 29 4-Hydroxybutanoic acid; 43 0.133 -0.000334 0.26500 5.06e-02
## 30 Succinic acid, 2TMS; 7 0.131 -0.001280 0.26400 5.23e-02
## 31 Glyceric acid; 30 -0.129 -0.259000 0.00172 5.31e-02
## 32 1,3-Propanediol; 34 0.130 -0.002880 0.26400 5.52e-02
## 33 Proline, 2TMS; 21 0.127 -0.003950 0.25900 5.73e-02
## 34 Ribitol; 71 0.121 -0.006290 0.24800 6.25e-02
## 35 3-Indolepropionic acid; 41 -0.121 -0.253000 0.01130 7.30e-02
## 36 Glycine, 3TMS; 17 -0.114 -0.245000 0.01740 8.91e-02
## 37 Tartronic acid; 73 -0.114 -0.245000 0.01760 8.97e-02
## 38 4-Deoxytetronic acid; 33 0.111 -0.019300 0.24100 9.52e-02
##
## p.adj
## 1 0.00197
## 2 0.00197
## 3 0.00197
## 4 0.00197
## 5 0.00197
## 6 0.00413
## 7 0.00413
## 8 0.01540
## 9 0.03050

```

```

## 10 0.03070
## 11 0.03070
## 12 0.03070
## 13 0.04660
## 14 0.05460
## 15 0.05890
## 16 0.06460
## 17 0.06460
## 18 0.06460
## 19 0.06460
## 20 0.06460
## 21 0.06460
## 22 0.06460
## 23 0.06460
## 24 0.06950
## 25 0.06950
## 26 0.08070
## 27 0.10900
## 28 0.11500
## 29 0.12800
## 30 0.12800
## 31 0.12800
## 32 0.12900
## 33 0.13000
## 34 0.13800
## 35 0.15600
## 36 0.18200
## 37 0.18200
## 38 0.18800
## [1] ""
## [1] "Table: Total_cholesterol"
## [1] " (from model: "
## [1] " ~ Amputation.at.DATE + Age.x + Gender.x + Hba1c_baseline"
## [1] " + CALSBP + bmi + Smoking + Statin + log_Blood_TGA +"
## [1] " Total_cholesterol + egfr + logUAER)"
## [1] ""
##
## Name Coefficient CI.L CI.R p.value
## 1 Cholesterol, TMS; 23 0.4510 0.356000 0.54600 2.96e-20
## 2 Campesterol; 49 0.3730 0.276000 0.46900 5.72e-14
## 3 alpha-Tocopherol; 26 0.3230 0.227000 0.42000 6.93e-11
## 4 Benzeneacetic acid; 47 -0.1890 -0.287000 -0.09100 1.61e-04
## 5 Linoleic acid, TMS; 4 0.1810 0.083300 0.27900 2.94e-04
## 6 4-Hydroxybutanoic acid; 43 -0.1700 -0.269000 -0.07160 7.26e-04
## 7 L-5-Oxoproline; 63 -0.1690 -0.267000 -0.07040 7.82e-04
## 8 Isoleucine, 2TMS; 18 -0.1640 -0.261000 -0.06790 8.48e-04
## 9 Proline, 2TMS; 21 -0.1640 -0.261000 -0.06630 9.94e-04
## 10 Tyrosine; 75 -0.1600 -0.258000 -0.06170 1.42e-03
## 11 Methionine, 2TMS; 16 -0.1570 -0.254000 -0.05930 1.64e-03
## 12 Eicosapentaenoic acid; 55 0.1530 0.057200 0.25000 1.80e-03
## 13 Glycine, 3TMS; 17 -0.1510 -0.248000 -0.05330 2.43e-03
## 14 Docosahexaenoic acid; 53 0.1480 0.051500 0.24500 2.69e-03
## 15 Threonine, 3TMS; 12 -0.1500 -0.248000 -0.05140 2.88e-03
## 16 Alanine, 2TMS; 25 -0.1380 -0.236000 -0.03970 5.93e-03
## 17 Arabinopyranose; 51 -0.1360 -0.234000 -0.03800 6.54e-03

```

```

## 18      Glyceryl-glycoside; 59      -0.1310 -0.229000 -0.03370 8.42e-03
## 19 4-Hydroxybenzeneacetic acid; 4  -0.1270 -0.223000 -0.03140 9.27e-03
## 20      Malic acid, 3TMS; 11      -0.1290 -0.227000 -0.03080 1.00e-02
## 21 2,4-Dihydroxybutanoic acid; 28  -0.1220 -0.216000 -0.02770 1.12e-02
## 22      2-Palmitoylglycerol; 39      0.1240 0.025500 0.22300 1.36e-02
## 23      Hydroxylamine; 62      -0.1230 -0.222000 -0.02450 1.44e-02
## 24      Serine, 3TMS; 14      -0.1220 -0.220000 -0.02420 1.46e-02
## 25      3-Indoleacetic acid; 40      -0.1160 -0.213000 -0.01820 2.01e-02
## 26      Ribitol; 71      -0.1020 -0.196000 -0.00744 3.45e-02
## 27      Phenylalanine, 2TMS; 13      -0.1060 -0.205000 -0.00774 3.45e-02
## 28      Ribonic acid; 72      -0.0969 -0.191000 -0.00252 4.42e-02
## 29      Palmitic acid, TMS; 5      0.0971 -0.000468 0.19500 5.11e-02
## 30 3,4-Dihydroxybutanoic acid; 27  -0.0928 -0.188000 0.00217 5.55e-02
## 31      Pyruvic acid; 31      -0.0955 -0.194000 0.00274 5.67e-02
## 32      Ethanolamine; 56      -0.0934 -0.192000 0.00510 6.31e-02
## 33      Leucine, 2TMS; 19      -0.0914 -0.189000 0.00572 6.51e-02
##      p.adj
## 1 2.22e-18
## 2 2.15e-12
## 3 1.73e-09
## 4 3.01e-03
## 5 4.41e-03
## 6 7.95e-03
## 7 7.95e-03
## 8 7.95e-03
## 9 8.28e-03
## 10 1.07e-02
## 11 1.11e-02
## 12 1.12e-02
## 13 1.40e-02
## 14 1.44e-02
## 15 1.44e-02
## 16 2.78e-02
## 17 2.89e-02
## 18 3.51e-02
## 19 3.66e-02
## 20 3.75e-02
## 21 4.01e-02
## 22 4.56e-02
## 23 4.56e-02
## 24 4.56e-02
## 25 6.02e-02
## 26 9.59e-02
## 27 9.59e-02
## 28 1.18e-01
## 29 1.32e-01
## 30 1.37e-01
## 31 1.37e-01
## 32 1.48e-01
## 33 1.48e-01
## [1] ""
## [1] "Table: egfr"
## [1] " (from model: "
## [1] " ~ Amputation.at.DATE + Age.x + Gender.x + Hba1c_baseline"

```

```

## [1] "      + CALSBP + bmi + Smoking + Statin + log_Blood_TGA +"
## [1] "      Total_cholesterol + egfr + logUAER)"
## [1] ""
##
##              Name Coefficient      CI.L      CI.R  p.value
## 1      Myo inositol 6TMS; 1   -0.01600 -1.92e-02 -1.28e-02 2.87e-22
## 2              Ribitol; 71   -0.01510 -1.83e-02 -1.19e-02 6.56e-20
## 3              Creatinine; 50 -0.01490 -1.82e-02 -1.17e-02 6.34e-19
## 4 2,4-Dihydroxybutanoic acid; 28 -0.01470 -1.79e-02 -1.15e-02 6.82e-19
## 5              Ribonic acid; 72 -0.01310 -1.63e-02 -9.91e-03 2.23e-15
## 6 3,4-Dihydroxybutanoic acid; 27 -0.01130 -1.45e-02 -8.06e-03 1.05e-11
## 7      4-Deoxytetrionic acid; 33 -0.01120 -1.45e-02 -7.93e-03 2.88e-11
## 8 4-Hydroxybenzeneacetic acid; 4 -0.01090 -1.41e-02 -7.59e-03 9.16e-11
## 9      Isoleucine, 2TMS; 18    0.00980  6.52e-03  1.31e-02 5.71e-09
## 10     4-Deoxytetrionic acid; 32 -0.00898 -1.23e-02 -5.67e-03 1.16e-07
## 11     Citric acid, 4TMS; 6     -0.00893 -1.22e-02 -5.63e-03 1.24e-07
## 12     Pyroglutamic acid; 69   -0.00862 -1.19e-02 -5.29e-03 4.11e-07
## 13 2-Hydroxybutyric acid, 2TMS; 2  0.00832  5.04e-03  1.16e-02 7.18e-07
## 14     3-Indoleacetic acid; 40   -0.00756 -1.09e-02 -4.24e-03 8.35e-06
## 15 4-Hydroxyphenyllactic acid; 44 -0.00756 -1.09e-02 -4.24e-03 8.70e-06
## 16     Valine, 2TMS; 20         0.00741  4.15e-03  1.07e-02 9.19e-06
## 17     Glyceryl-glycoside; 59   -0.00644 -9.77e-03 -3.12e-03 1.50e-04
## 18     Hydroxyproline; 64       -0.00623 -9.56e-03 -2.89e-03 2.62e-04
## 19     Leucine, 2TMS; 19        0.00599  2.68e-03  9.30e-03 3.95e-04
## 20     Glycine, 3TMS; 17       -0.00600 -9.32e-03 -2.69e-03 3.95e-04
## 21     Serine, 3TMS; 14        0.00604  2.70e-03  9.38e-03 4.01e-04
## 22     Fumaric acid, 2TMS; 9    -0.00586 -9.20e-03 -2.52e-03 5.96e-04
## 23     Stearic acid, TMS; 2     0.00540  2.06e-03  8.74e-03 1.54e-03
## 24     Eicosapentaenoic acid; 55 0.00501  1.73e-03  8.29e-03 2.75e-03
## 25     Methionine, 2TMS; 16     0.00459  1.27e-03  7.90e-03 6.74e-03
## 26     Glycerol; 57            0.00429  9.35e-04  7.65e-03 1.23e-02
## 27     Octanoic acid; 68        0.00409  7.51e-04  7.42e-03 1.64e-02
## 28     Palmitic acid, TMS; 5    0.00407  7.46e-04  7.39e-03 1.64e-02
## 29     Benzeneacetic acid; 47   -0.00407 -7.41e-03 -7.37e-04 1.67e-02
## 30     Malic acid, 3TMS; 11     -0.00401 -7.35e-03 -6.76e-04 1.85e-02
## 31     Aminomalonic acid; 45    -0.00383 -7.15e-03 -5.17e-04 2.35e-02
## 32     Cholesterol, TMS; 23     0.00337  1.44e-04  6.59e-03 4.06e-02
## 33     Tyrosine; 75             0.00334  1.18e-06  6.68e-03 4.99e-02
## 34     Alanine, 2TMS; 25       -0.00334 -6.68e-03 -2.94e-07 5.00e-02
## 35     Glycerol; 58            -0.00313 -6.50e-03  2.44e-04 6.90e-02
## 36     Campesterol; 49         -0.00303 -6.32e-03  2.51e-04 7.02e-02
## 37     Phenylalanine, 2TMS; 13 -0.00294 -6.29e-03  4.14e-04 8.58e-02
## 38 2-hydroxy Isovaleric acid; 38  0.00292 -4.28e-04  6.26e-03 8.74e-02
## 39 2-Palmitoylglycerol; 39     0.00285 -5.06e-04  6.21e-03 9.60e-02
##
##      p.adj
## 1 2.15e-20
## 2 2.46e-18
## 3 1.28e-17
## 4 1.28e-17
## 5 3.34e-14
## 6 1.32e-10
## 7 3.09e-10
## 8 8.59e-10
## 9 4.76e-08
## 10 8.45e-07

```

```

## 11 8.45e-07
## 12 2.57e-06
## 13 4.14e-06
## 14 4.31e-05
## 15 4.31e-05
## 16 4.31e-05
## 17 6.64e-04
## 18 1.09e-03
## 19 1.43e-03
## 20 1.43e-03
## 21 1.43e-03
## 22 2.03e-03
## 23 5.02e-03
## 24 8.58e-03
## 25 2.02e-02
## 26 3.54e-02
## 27 4.33e-02
## 28 4.33e-02
## 29 4.33e-02
## 30 4.62e-02
## 31 5.69e-02
## 32 9.51e-02
## 33 1.10e-01
## 34 1.10e-01
## 35 1.46e-01
## 36 1.46e-01
## 37 1.72e-01
## 38 1.72e-01
## 39 1.85e-01
## [1] ""
## [1] "Table: logUAER"
## [1] " (from model: "
## [1] " ~ Amputation.at.DATE + Age.x + Gender.x + Hba1c_baseline"
## [1] " + CALSBP + bmi + Smoking + Statin + log_Blood_TGA +"
## [1] " Total_cholesterol + egfr + logUAER)"
## [1] ""
##
## Name Coefficient CI.L CI.R p.value p.adj
## 1 3,4-Dihydroxybutanoic acid; 27 0.0733 0.0333 0.113 0.000337 0.0253
## 2 4-Deoxytetronic acid; 32 0.0638 0.0229 0.105 0.002270 0.0853

```

### 5.1.4.3 Table with All Metabolites

```

## [1] ""
## [1] "Table: Amputation.at.DATEJA"
## [1] " (from model: "
## [1] " ~ Amputation.at.DATE + Age.x + Gender.x + Hba1c_baseline"
## [1] " + CALSBP + bmi + Smoking + Statin + log_Blood_TGA +"
## [1] " Total_cholesterol + egfr + logUAER)"
## [1] ""
##
##          Name Coefficient   CI.L   CI.R p.value p.adj
## 1  Succinic acid, 2TMS; 7    0.55400 0.1290 0.9780 0.0107 0.509
## 2           Glycerol; 57    0.52300 0.0963 0.9490 0.0163 0.509
## 3      Threonine, 3TMS; 12   -0.49200 -0.9170 -0.0663 0.0235 0.509
## 4  Phenylalanine, 2TMS; 13   -0.48000 -0.9060 -0.0543 0.0271 0.509
## 5      Glutamic acid, 3TMS; 8 -0.43800 -0.8550 -0.0213 0.0394 0.591
## 6      Ribonic acid; 72     0.37800 -0.0303 0.7870 0.0696 0.867
## 7      Stearic acid, TMS; 2   0.35300 -0.0707 0.7770 0.1020 0.867
## 8  2-Hydroxybutyric acid, 2TMS; 2 0.34100 -0.0755 0.7570 0.1090 0.867
## 9      Heptadecanoic acid; 61 0.33400 -0.0916 0.7590 0.1240 0.867
## 10             Tyrosine; 75   -0.32900 -0.7540 0.0950 0.1280 0.867
## 11             Proline, 2TMS; 21 -0.31600 -0.7370 0.1050 0.1410 0.867
## 12             Methionine, 2TMS; 16 -0.31000 -0.7310 0.1120 0.1490 0.867
## 13      Myristoleic acid; 65    0.28600 -0.1360 0.7080 0.1840 0.867
## 14      Arabinopyranose; 51   -0.27200 -0.6960 0.1520 0.2080 0.867
## 15      Dodecanoic acid; 54    0.27100 -0.1520 0.6940 0.2090 0.867
## 16  4-Hydroxybutanoic acid; 43    0.27000 -0.1560 0.6960 0.2150 0.867
## 17      Campesterol; 49       -0.26100 -0.6780 0.1560 0.2200 0.867
## 18      Pyroglutamic acid; 69    0.26200 -0.1610 0.6840 0.2240 0.867
## 19  4-Hydroxybenzeneacetic acid; 4 0.25500 -0.1590 0.6700 0.2270 0.867
## 20      Malic acid, 3TMS; 11    0.23900 -0.1850 0.6620 0.2700 0.867
## 21      Leucine, 2TMS; 19       -0.22600 -0.6460 0.1940 0.2920 0.867
## 22      Aminomalonic acid; 45   -0.22600 -0.6470 0.1960 0.2940 0.867
## 23      Hydroxyproline; 64      0.22500 -0.1990 0.6490 0.2970 0.867
## 24      Myo inositol 6TMS; 1     0.21400 -0.1920 0.6190 0.3010 0.867
## 25      Palmitic acid, TMS; 5    0.21500 -0.2070 0.6370 0.3170 0.867
## 26  3-Indolepropionic acid; 41   -0.21300 -0.6360 0.2110 0.3250 0.867
## 27      Octanoic acid; 68       0.21100 -0.2130 0.6340 0.3300 0.867
## 28      Heptadecanoic acid; 60    0.21000 -0.2150 0.6360 0.3320 0.867
## 29  4-Hydroxyphenyllactic acid; 44 0.20700 -0.2150 0.6300 0.3350 0.867
## 30      Tridecanoic acid; 74     0.19500 -0.2310 0.6210 0.3690 0.922
## 31  2-hydroxy Isovaleric acid; 38  -0.17500 -0.6000 0.2490 0.4180 0.969
## 32      Decanoic acid; 52       0.17300 -0.2500 0.5960 0.4220 0.969
## 33      Valine, 2TMS; 20        -0.16400 -0.5790 0.2510 0.4380 0.969
## 34      Serine, 3TMS; 14        -0.16600 -0.5900 0.2580 0.4430 0.969
## 35  2-Palmitoylglycerol; 39      -0.15800 -0.5840 0.2690 0.4680 0.969
## 36      Alanine, 2TMS; 25       0.15400 -0.2700 0.5780 0.4760 0.969
## 37      Hydroxylamine; 62       0.15200 -0.2740 0.5790 0.4840 0.969
## 38      1-Dodecanol; 36         0.13700 -0.2900 0.5650 0.5290 0.969
## 39      Arachidic acid; 46      0.13600 -0.2890 0.5620 0.5300 0.969
## 40      Lactic acid; 29         0.13100 -0.2930 0.5560 0.5430 0.969
## 41      Citric acid, 4TMS; 6    -0.12200 -0.5410 0.2970 0.5680 0.969
## 42      11-Eicosenoic acid; 35   0.12000 -0.3060 0.5470 0.5810 0.969
## 43      Creatinine; 50          0.11400 -0.3000 0.5280 0.5880 0.969
## 44      1-Monopalmitin; 37     0.11700 -0.3110 0.5440 0.5930 0.969

```

|       |                                |          |         |        |        |       |
|-------|--------------------------------|----------|---------|--------|--------|-------|
| ## 45 | Eicosapentaenoic acid; 55      | -0.10500 | -0.5220 | 0.3110 | 0.6190 | 0.969 |
| ## 46 | Ribitol; 70                    | 0.10100  | -0.3230 | 0.5260 | 0.6400 | 0.969 |
| ## 47 | Cholesterol, TMS; 23           | 0.09560  | -0.3140 | 0.5050 | 0.6470 | 0.969 |
| ## 48 | Tartronic acid; 73             | -0.09770 | -0.5180 | 0.3230 | 0.6490 | 0.969 |
| ## 49 | Arachidonic acid, TMS; 24      | 0.09520  | -0.3310 | 0.5210 | 0.6610 | 0.969 |
| ## 50 | Glycine, 3TMS; 17              | -0.08960 | -0.5110 | 0.3310 | 0.6760 | 0.969 |
| ## 51 | alpha-Tocopherol; 26           | -0.08260 | -0.5000 | 0.3350 | 0.6980 | 0.969 |
| ## 52 | alpha-ketoglutaric acid, TMS M | -0.07540 | -0.5010 | 0.3500 | 0.7280 | 0.969 |
| ## 53 | Docosahexaenoic acid; 53       | 0.07250  | -0.3460 | 0.4910 | 0.7340 | 0.969 |
| ## 54 | 3-Indoleacetic acid; 40        | -0.06790 | -0.4890 | 0.3530 | 0.7520 | 0.969 |
| ## 55 | Benzeneacetic acid; 47         | -0.06620 | -0.4900 | 0.3580 | 0.7590 | 0.969 |
| ## 56 | Ribitol; 71                    | 0.06250  | -0.3450 | 0.4700 | 0.7630 | 0.969 |
| ## 57 | Ethanolamine; 56               | 0.06320  | -0.3630 | 0.4890 | 0.7710 | 0.969 |
| ## 58 | Isoleucine, 2TMS; 18           | 0.05270  | -0.3640 | 0.4690 | 0.8040 | 0.969 |
| ## 59 | Linoleic acid, TMS; 4          | 0.05130  | -0.3730 | 0.4750 | 0.8130 | 0.969 |
| ## 60 | Oleic acid, TMS; 3             | 0.05030  | -0.3740 | 0.4740 | 0.8160 | 0.969 |
| ## 61 | Pyruvic acid; 31               | 0.04530  | -0.3800 | 0.4700 | 0.8350 | 0.969 |
| ## 62 | 3,4-Dihydroxybutanoic acid; 27 | 0.04320  | -0.3680 | 0.4540 | 0.8370 | 0.969 |
| ## 63 | Glyceric acid; 30              | -0.03570 | -0.4540 | 0.3820 | 0.8670 | 0.969 |
| ## 64 | Nonadecanoic acid; 66          | 0.03520  | -0.3900 | 0.4610 | 0.8710 | 0.969 |
| ## 65 | Glycerol; 58                   | -0.03410 | -0.4620 | 0.3940 | 0.8760 | 0.969 |
| ## 66 | 3-Hydroxybutyric acid, 2TMS; 1 | 0.03040  | -0.3980 | 0.4580 | 0.8890 | 0.969 |
| ## 67 | Fumaric acid, 2TMS; 9          | -0.02840 | -0.4530 | 0.3960 | 0.8960 | 0.969 |
| ## 68 | 1,3-Propanediol; 34            | 0.02550  | -0.4010 | 0.4530 | 0.9070 | 0.969 |
| ## 69 | Nonanoic acid; 67              | 0.02370  | -0.4040 | 0.4510 | 0.9130 | 0.969 |
| ## 70 | Bisphenol A; 48                | -0.02320 | -0.4510 | 0.4050 | 0.9150 | 0.969 |
| ## 71 | L-5-Oxoproline; 63             | -0.01970 | -0.4450 | 0.4060 | 0.9280 | 0.969 |
| ## 72 | 4-Deoxytetronic acid; 32       | 0.01880  | -0.4010 | 0.4390 | 0.9300 | 0.969 |
| ## 73 | Glyceryl-glycoside; 59         | 0.00789  | -0.4150 | 0.4300 | 0.9710 | 0.978 |
| ## 74 | 4-Deoxytetronic acid; 33       | 0.00733  | -0.4100 | 0.4240 | 0.9730 | 0.978 |
| ## 75 | 2,4-Dihydroxybutanoic acid; 28 | 0.00584  | -0.4020 | 0.4130 | 0.9780 | 0.978 |



## 5.2 Amputation from DATE

### 5.2.1 Crude Model

### 5.2.1.1 Forest Plot of Model Coefficients

```
## NULL
```

### 5.2.1.2 Table with All Metabolites

| Name                        | exp(coef) | Lower 95 % | Upper 95 % | Pr(> z ) | p.adj |
|-----------------------------|-----------|------------|------------|----------|-------|
| 4-Hydroxybenzeneacetic acid | 1.97      | 1.28       | 3.01       | 0.00189  | 0.142 |
| Ribitol (2)                 | 1.53      | 1.02       | 2.3        | 0.0384   | 0.525 |
| Palmitic acid               | 0.697     | 0.493      | 0.986      | 0.0416   | 0.525 |
| Stearic acid                | 0.687     | 0.467      | 1.01       | 0.0572   | 0.525 |
| Ribonic acid                | 1.5       | 0.98       | 2.28       | 0.0622   | 0.525 |
| 2-Hydroxybutyric acid       | 0.747     | 0.543      | 1.03       | 0.0731   | 0.525 |
| Oleic acid                  | 0.703     | 0.474      | 1.04       | 0.0802   | 0.525 |
| 2,4-Dihydroxybutanoic acid  | 1.39      | 0.959      | 2.01       | 0.0822   | 0.525 |
| 3,4-Dihydroxybutanoic acid  | 1.37      | 0.943      | 2          | 0.0982   | 0.525 |
| Hydroxylamine               | 0.805     | 0.615      | 1.05       | 0.113    | 0.525 |
| Ethanolamine                | 1.35      | 0.928      | 1.97       | 0.116    | 0.525 |
| Decanoic acid               | 0.787     | 0.582      | 1.07       | 0.121    | 0.525 |
| Arabinopyranose             | 1.45      | 0.897      | 2.33       | 0.13     | 0.525 |
| 3-Hydroxybutyric acid       | 0.757     | 0.523      | 1.1        | 0.14     | 0.525 |
| 3-Indolepropionic acid      | 0.831     | 0.647      | 1.07       | 0.148    | 0.525 |
| 4-Deoxytetronic acid (1)    | 1.35      | 0.9        | 2.01       | 0.148    | 0.525 |
| 2-hydroxy Isovaleric acid   | 0.786     | 0.566      | 1.09       | 0.15     | 0.525 |
| Benzeneacetic acid          | 1.38      | 0.883      | 2.14       | 0.158    | 0.525 |
| Glycerol (2)                | 0.798     | 0.581      | 1.1        | 0.163    | 0.525 |
| Linoleic acid               | 0.834     | 0.645      | 1.08       | 0.165    | 0.525 |
| Creatinine                  | 1.32      | 0.889      | 1.97       | 0.168    | 0.525 |
| Nonanoic acid               | 0.813     | 0.605      | 1.09       | 0.168    | 0.525 |
| Arachidic acid              | 0.77      | 0.531      | 1.12       | 0.169    | 0.525 |
| Glutamic acid               | 1.32      | 0.887      | 1.96       | 0.171    | 0.525 |
| Tridecanoic acid            | 0.822     | 0.62       | 1.09       | 0.175    | 0.525 |
| 11-Eicosenoic acid          | 0.828     | 0.62       | 1.11       | 0.201    | 0.561 |
| 1,3-Propanediol             | 0.828     | 0.618      | 1.11       | 0.205    | 0.561 |
| Lactic acid                 | 0.804     | 0.572      | 1.13       | 0.21     | 0.561 |
| L-5-Oxoproline              | 0.823     | 0.591      | 1.14       | 0.247    | 0.621 |
| 1-Dodecanol                 | 0.821     | 0.586      | 1.15       | 0.252    | 0.621 |
| Heptadecanoic acid (2)      | 0.819     | 0.58       | 1.16       | 0.257    | 0.621 |
| Tartronic acid              | 0.829     | 0.588      | 1.17       | 0.286    | 0.671 |
| Methionine                  | 1.23      | 0.825      | 1.83       | 0.309    | 0.697 |
| Glycerol (1)                | 0.886     | 0.7        | 1.12       | 0.316    | 0.697 |
| Phenylalanine               | 1.21      | 0.826      | 1.77       | 0.33     | 0.702 |
| Alanine                     | 1.21      | 0.822      | 1.77       | 0.337    | 0.702 |
| Proline                     | 1.19      | 0.813      | 1.75       | 0.371    | 0.721 |
| Docosaehaenoic acid         | 0.88      | 0.66       | 1.17       | 0.386    | 0.721 |
| Eicosapentaenoic acid       | 1.19      | 0.802      | 1.77       | 0.387    | 0.721 |
| Myristoleic acid            | 0.863     | 0.616      | 1.21       | 0.395    | 0.721 |
| Glyceryl-glycoside          | 1.21      | 0.777      | 1.9        | 0.395    | 0.721 |
| Campesterol                 | 0.869     | 0.619      | 1.22       | 0.418    | 0.721 |
| Fumaric acid                | 1.16      | 0.799      | 1.69       | 0.43     | 0.721 |
| 3-Indoleacetic acid         | 1.17      | 0.794      | 1.71       | 0.433    | 0.721 |
| Dodecanoic acid             | 0.868     | 0.605      | 1.24       | 0.441    | 0.721 |
| Bisphenol A                 | 0.869     | 0.601      | 1.26       | 0.456    | 0.721 |
| Glyceric acid               | 0.88      | 0.628      | 1.23       | 0.458    | 0.721 |
| Isoleucine                  | 1.17      | 0.766      | 1.8        | 0.463    | 0.721 |
| Leucine                     | 1.16      | 0.77       | 1.76       | 0.473    | 0.721 |
| 4-Hydroxyphenyllactic acid  | 1.16      | 0.769      | 1.75       | 0.48     | 0.721 |

| Name                     | exp(coef) | Lower 95 % | Upper 95 % | Pr(> z ) | p.adj |
|--------------------------|-----------|------------|------------|----------|-------|
| 2-Palmitoylglycerol      | 1.14      | 0.771      | 1.67       | 0.52     | 0.762 |
| Aminomalonic acid        | 1.13      | 0.773      | 1.65       | 0.528    | 0.762 |
| Citric acid              | 0.896     | 0.626      | 1.28       | 0.549    | 0.777 |
| Cholesterol              | 0.896     | 0.619      | 1.3        | 0.56     | 0.777 |
| Ribitol (1)              | 1.11      | 0.764      | 1.62       | 0.575    | 0.784 |
| 4-Deoxytetronic acid (2) | 0.908     | 0.642      | 1.29       | 0.587    | 0.787 |
| Succinic acid            | 1.1       | 0.758      | 1.61       | 0.607    | 0.788 |
| Hydroxyproline           | 1.1       | 0.755      | 1.61       | 0.609    | 0.788 |
| 1-Monopalmitin           | 0.93      | 0.687      | 1.26       | 0.641    | 0.814 |
| Glycine                  | 1.09      | 0.752      | 1.57       | 0.655    | 0.818 |
| Octanoic acid            | 0.942     | 0.679      | 1.31       | 0.721    | 0.879 |
| Pyruvic acid             | 1.07      | 0.735      | 1.56       | 0.727    | 0.879 |
| Arachidonic acid         | 1.06      | 0.723      | 1.56       | 0.758    | 0.886 |
| Valine                   | 0.948     | 0.661      | 1.36       | 0.771    | 0.886 |
| Pyroglutamic acid        | 0.952     | 0.672      | 1.35       | 0.78     | 0.886 |
| Myo inositol             | 1.05      | 0.725      | 1.53       | 0.784    | 0.886 |
| Nonadecanoic acid        | 0.956     | 0.671      | 1.36       | 0.802    | 0.886 |
| Serine                   | 0.954     | 0.66       | 1.38       | 0.803    | 0.886 |
| Tyrosine                 | 1.05      | 0.696      | 1.57       | 0.827    | 0.899 |
| Malic acid               | 1.04      | 0.713      | 1.51       | 0.843    | 0.904 |
| alpha-Tocopherol         | 1.01      | 0.695      | 1.47       | 0.959    | 0.982 |
| 4-Hydroxybutanoic acid   | 0.995     | 0.689      | 1.44       | 0.978    | 0.982 |
| Threonine                | 0.996     | 0.686      | 1.44       | 0.981    | 0.982 |
| alpha-ketoglutaric acid  | 0.996     | 0.694      | 1.43       | 0.981    | 0.982 |
| Heptadecanoic acid (1)   | 0.996     | 0.69       | 1.44       | 0.982    | 0.982 |

### 5.2.1.3 Top-Metabolite from Cross-Sectional Analysis

```
## Call:
## survival::coxph(formula = survival::Surv(time = Amputation.tdiff,
##     event = Amputation.from.DATE) ~ Ribonic_acid, data = data.km)
##
## n= 614, number of events= 28
## (23 observations deleted due to missingness)
##
##           coef exp(coef) se(coef)      z Pr(>|z|)
## Ribonic_acid 0.4095   1.5060  0.2195 1.865  0.0622 .
## ---
## Signif. codes:  0 '***' 0.001 '**' 0.01 '*' 0.05 '.' 0.1 ' ' 1
##
##           exp(coef) exp(-coef) lower .95 upper .95
## Ribonic_acid      1.506      0.664  0.9794      2.316
##
## Concordance= 0.611 (se = 0.05 )
## Likelihood ratio test= 3.7  on 1 df,  p=0.05
## Wald test               = 3.48  on 1 df,  p=0.06
## Score (logrank) test = 3.29  on 1 df,  p=0.07
```

### 5.2.1.4 Kaplan-Maier Curve with Median Cutpoint

- Top metabolite from cross-sectional analysis



#### Number at risk

|                    | 0   | 1000 | 2000 | 3000 | 4000 |
|--------------------|-----|------|------|------|------|
| Ribonic_acid= >50% | 300 | 296  | 294  | 287  | 0    |
| Ribonic_acid= <50% | 314 | 310  | 307  | 305  | 0    |

#### Cumulative number of events

|                    | 0 | 1000 | 2000 | 3000 | 4000 |
|--------------------|---|------|------|------|------|
| Ribonic_acid= >50% | 0 | 4    | 6    | 13   | 17   |
| Ribonic_acid= <50% | 0 | 4    | 7    | 9    | 11   |

## 5.2.2 Adjusted Model

### 5.2.2.1 Forest Plot of Model Coefficients

```
## NULL
```



### 5.2.2.2 Table with All Metabolites

| Name                        | exp(coef) | Lower 95 % | Upper 95 % | Pr(> z ) | p.adj |
|-----------------------------|-----------|------------|------------|----------|-------|
| 2-Hydroxybutyric acid       | 0.582     | 0.412      | 0.823      | 0.00216  | 0.162 |
| Palmitic acid               | 0.632     | 0.456      | 0.876      | 0.00589  | 0.221 |
| 4-Hydroxybenzeneacetic acid | 1.73      | 1.08       | 2.76       | 0.0221   | 0.43  |
| Lactic acid                 | 0.7       | 0.511      | 0.958      | 0.026    | 0.43  |
| Oleic acid                  | 0.638     | 0.426      | 0.954      | 0.0286   | 0.43  |
| 3-Hydroxybutyric acid       | 0.646     | 0.425      | 0.982      | 0.0408   | 0.46  |
| Stearic acid                | 0.69      | 0.482      | 0.988      | 0.0429   | 0.46  |
| 4-Deoxytetronic acid (1)    | 1.51      | 0.987      | 2.3        | 0.0573   | 0.537 |
| Glycerol (2)                | 0.715     | 0.5        | 1.02       | 0.0669   | 0.557 |
| Aminomalonic acid           | 1.44      | 0.94       | 2.21       | 0.094    | 0.615 |
| Glycerol (1)                | 0.827     | 0.662      | 1.03       | 0.0951   | 0.615 |
| Benzeneacetic acid          | 1.5       | 0.927      | 2.44       | 0.0983   | 0.615 |
| Myristoleic acid            | 0.756     | 0.525      | 1.09       | 0.134    | 0.626 |
| Decanoic acid               | 0.788     | 0.575      | 1.08       | 0.138    | 0.626 |
| Ribonic acid                | 1.36      | 0.886      | 2.08       | 0.16     | 0.626 |
| Creatinine                  | 1.33      | 0.892      | 1.97       | 0.163    | 0.626 |
| Ribitol (2)                 | 1.37      | 0.878      | 2.12       | 0.166    | 0.626 |
| Hydroxylamine               | 0.821     | 0.615      | 1.1        | 0.181    | 0.626 |
| Linoleic acid               | 0.817     | 0.606      | 1.1        | 0.185    | 0.626 |
| 11-Eicosenoic acid          | 0.819     | 0.607      | 1.1        | 0.189    | 0.626 |
| Methionine                  | 1.33      | 0.867      | 2.05       | 0.189    | 0.626 |
| 4-Deoxytetronic acid (2)    | 0.781     | 0.538      | 1.13       | 0.192    | 0.626 |
| Ethanolamine                | 1.29      | 0.882      | 1.87       | 0.192    | 0.626 |
| Arachidic acid              | 0.772     | 0.51       | 1.17       | 0.222    | 0.685 |
| 2-hydroxy Isovaleric acid   | 0.813     | 0.58       | 1.14       | 0.228    | 0.685 |
| Arabinopyranose             | 1.33      | 0.814      | 2.18       | 0.254    | 0.695 |
| Glycine                     | 1.25      | 0.852      | 1.83       | 0.255    | 0.695 |
| 2,4-Dihydroxybutanoic acid  | 1.26      | 0.838      | 1.9        | 0.265    | 0.695 |
| Dodecanoic acid             | 0.809     | 0.556      | 1.18       | 0.269    | 0.695 |
| Campesterol                 | 0.824     | 0.561      | 1.21       | 0.324    | 0.79  |
| Heptadecanoic acid (2)      | 0.848     | 0.606      | 1.19       | 0.337    | 0.79  |
| Nonanoic acid               | 0.873     | 0.662      | 1.15       | 0.337    | 0.79  |
| Tridecanoic acid            | 0.883     | 0.666      | 1.17       | 0.385    | 0.868 |
| L-5-Oxoproline              | 0.847     | 0.579      | 1.24       | 0.394    | 0.868 |
| Valine                      | 0.857     | 0.572      | 1.28       | 0.453    | 0.947 |
| Eicosapentaenoic acid       | 1.17      | 0.76       | 1.8        | 0.474    | 0.947 |
| Phenylalanine               | 1.15      | 0.775      | 1.7        | 0.489    | 0.947 |
| 1,3-Propanediol             | 0.911     | 0.687      | 1.21       | 0.518    | 0.947 |
| Docosahexaenoic acid        | 0.901     | 0.651      | 1.25       | 0.529    | 0.947 |
| 3,4-Dihydroxybutanoic acid  | 1.13      | 0.758      | 1.68       | 0.548    | 0.947 |
| 1-Monopalmitin              | 0.912     | 0.671      | 1.24       | 0.555    | 0.947 |
| Citric acid                 | 0.893     | 0.603      | 1.32       | 0.572    | 0.947 |
| Bisphenol A                 | 0.895     | 0.6        | 1.34       | 0.588    | 0.947 |
| Threonine                   | 1.13      | 0.719      | 1.78       | 0.596    | 0.947 |
| 3-Indolepropionic acid      | 0.917     | 0.663      | 1.27       | 0.602    | 0.947 |
| Glyceryl-glycoside          | 1.13      | 0.699      | 1.82       | 0.62     | 0.947 |
| Serine                      | 1.1       | 0.725      | 1.68       | 0.644    | 0.947 |
| Succinic acid               | 1.09      | 0.738      | 1.61       | 0.665    | 0.947 |
| Leucine                     | 1.1       | 0.7        | 1.72       | 0.688    | 0.947 |
| Alanine                     | 1.09      | 0.719      | 1.64       | 0.694    | 0.947 |

| Name                       | exp(coef) | Lower 95 % | Upper 95 % | Pr(> z ) | p.adj |
|----------------------------|-----------|------------|------------|----------|-------|
| 4-Hydroxybutanoic acid     | 1.08      | 0.736      | 1.58       | 0.695    | 0.947 |
| 1-Dodecanol                | 0.933     | 0.649      | 1.34       | 0.706    | 0.947 |
| Isoleucine                 | 1.09      | 0.686      | 1.74       | 0.707    | 0.947 |
| Myo inositol               | 0.932     | 0.637      | 1.36       | 0.716    | 0.947 |
| Cholesterol                | 0.922     | 0.591      | 1.44       | 0.719    | 0.947 |
| 2-Palmitoylglycerol        | 1.07      | 0.711      | 1.62       | 0.736    | 0.947 |
| 4-Hydroxyphenyllactic acid | 1.08      | 0.693      | 1.67       | 0.746    | 0.947 |
| Octanoic acid              | 0.947     | 0.63       | 1.42       | 0.793    | 0.947 |
| Tartronic acid             | 0.95      | 0.648      | 1.39       | 0.793    | 0.947 |
| Ribitol (1)                | 0.951     | 0.65       | 1.39       | 0.798    | 0.947 |
| alpha-ketoglutaric acid    | 0.962     | 0.708      | 1.31       | 0.802    | 0.947 |
| Fumaric acid               | 1.05      | 0.71       | 1.56       | 0.803    | 0.947 |
| Glyceric acid              | 1.04      | 0.746      | 1.45       | 0.811    | 0.947 |
| Arachidonic acid           | 1.04      | 0.746      | 1.44       | 0.83     | 0.947 |
| Malic acid                 | 0.968     | 0.678      | 1.38       | 0.858    | 0.947 |
| Tyrosine                   | 1.04      | 0.694      | 1.55       | 0.862    | 0.947 |
| Nonadecanoic acid          | 0.967     | 0.642      | 1.46       | 0.871    | 0.947 |
| Hydroxyproline             | 1.03      | 0.691      | 1.55       | 0.872    | 0.947 |
| Pyruvic acid               | 0.97      | 0.665      | 1.41       | 0.873    | 0.947 |
| Pyroglutamic acid          | 0.973     | 0.658      | 1.44       | 0.89     | 0.947 |
| 3-Indoleacetic acid        | 1.03      | 0.684      | 1.54       | 0.897    | 0.947 |
| Glutamic acid              | 1.02      | 0.658      | 1.58       | 0.933    | 0.963 |
| Proline                    | 1.02      | 0.674      | 1.53       | 0.937    | 0.963 |
| Heptadecanoic acid (1)     | 0.994     | 0.68       | 1.45       | 0.976    | 0.989 |
| alpha-Tocopherol           | 1         | 0.671      | 1.49       | 0.997    | 0.997 |

### 5.2.2.3 Top-Metabolite from Cross-Sectional Analysis

```
## Call:
## survival::coxph(formula = survival::Surv(time = Amputation.tdiff,
##     event = Amputation.from.DATE) ~ Ribonic_acid + Age.x + Gender.x +
##     Hba1c_baseline + CALSEP + bmi + Smoking + Statin + log_Blood_TGA +
##     Total_cholesterol, data = data.km)
##
## n= 600, number of events= 28
## (37 observations deleted due to missingness)
##
##           coef exp(coef) se(coef)      z Pr(>|z|)
## Ribonic_acid  0.31105  1.36486  0.22151  1.404  0.1602
## Age.x         0.02766  1.02805  0.01868  1.481  0.1387
## Gender.x     0.61355  1.84697  0.42533  1.443  0.1492
## Hba1c_baseline 0.25261  1.28738  0.14517  1.740  0.0818
## CALSBP       0.01409  1.01419  0.01051  1.341  0.1800
## bmi          0.05329  1.05473  0.04632  1.150  0.2500
## Smoking      0.43811  1.54978  0.43587  1.005  0.3148
## Statin       0.67232  1.95877  0.52152  1.289  0.1973
## log_Blood_TGA 0.31301  1.36754  0.30302  1.033  0.3016
## Total_cholesterol -0.02248  0.97777  0.22169 -0.101  0.9192
## ---
## Signif. codes:  0 '***' 0.001 '**' 0.01 '*' 0.05 '.' 0.1 ' ' 1
##
##           exp(coef) exp(-coef) lower .95 upper .95
## Ribonic_acid      1.3649    0.7327    0.8842    2.107
## Age.x              1.0280    0.9727    0.9911    1.066
## Gender.x           1.8470    0.5414    0.8024    4.251
## Hba1c_baseline     1.2874    0.7768    0.9686    1.711
## CALSBP             1.0142    0.9860    0.9935    1.035
## bmi                1.0547    0.9481    0.9632    1.155
## Smoking            1.5498    0.6453    0.6596    3.641
## Statin             1.9588    0.5105    0.7048    5.444
## log_Blood_TGA     1.3675    0.7312    0.7551    2.477
## Total_cholesterol  0.9778    1.0227    0.6332    1.510
##
## Concordance= 0.764 (se = 0.036 )
## Likelihood ratio test= 26.61 on 10 df, p=0.003
## Wald test              = 24.23 on 10 df, p=0.007
## Score (logrank) test = 25.34 on 10 df, p=0.005
```

### 5.2.2.3.1 Forest Plot with Clinical Variables

- Top metabolite from cross-sectional analysis



### 5.2.3 Adjusted Model with eGFR

### 5.2.3.1 Forest Plot of Model Coefficients

```
## NULL
```

### 5.2.3.2 Table with All Metabolites

| Name                        | exp(coef) | Lower 95 % | Upper 95 % | Pr(> z ) | p.adj |
|-----------------------------|-----------|------------|------------|----------|-------|
| Palmitic acid               | 0.625     | 0.435      | 0.897      | 0.0109   | 0.434 |
| 2-Hydroxybutyric acid       | 0.632     | 0.438      | 0.91       | 0.0137   | 0.434 |
| 4-Deoxytetronic acid (2)    | 0.643     | 0.446      | 0.925      | 0.0174   | 0.434 |
| 3-Hydroxybutyric acid       | 0.632     | 0.413      | 0.967      | 0.0343   | 0.489 |
| Oleic acid                  | 0.659     | 0.444      | 0.978      | 0.0384   | 0.489 |
| Lactic acid                 | 0.74      | 0.554      | 0.99       | 0.0423   | 0.489 |
| Glycerol (2)                | 0.702     | 0.496      | 0.993      | 0.0456   | 0.489 |
| Myo inositol                | 0.675     | 0.444      | 1.03       | 0.0653   | 0.612 |
| Stearic acid                | 0.718     | 0.499      | 1.03       | 0.0748   | 0.624 |
| Methionine                  | 1.46      | 0.945      | 2.24       | 0.0888   | 0.666 |
| Aminomalonic acid           | 1.43      | 0.924      | 2.22       | 0.108    | 0.726 |
| 4-Hydroxybenzeneacetic acid | 1.5       | 0.904      | 2.5        | 0.116    | 0.726 |
| Decanoic acid               | 0.79      | 0.573      | 1.09       | 0.15     | 0.741 |
| Benzeneacetic acid          | 1.39      | 0.867      | 2.24       | 0.17     | 0.741 |
| Ethanolamine                | 1.32      | 0.887      | 1.96       | 0.172    | 0.741 |
| 11-Eicosenoic acid          | 0.817     | 0.607      | 1.1        | 0.181    | 0.741 |
| Glycerol (1)                | 0.861     | 0.688      | 1.08       | 0.192    | 0.741 |
| 4-Deoxytetronic acid (1)    | 1.34      | 0.863      | 2.09       | 0.192    | 0.741 |
| Myristoleic acid            | 0.794     | 0.56       | 1.13       | 0.196    | 0.741 |
| Linoleic acid               | 0.829     | 0.62       | 1.11       | 0.204    | 0.741 |
| Nonanoic acid               | 0.84      | 0.637      | 1.11       | 0.217    | 0.741 |
| Arachidic acid              | 0.773     | 0.514      | 1.16       | 0.217    | 0.741 |
| Arabinopyranose             | 1.35      | 0.817      | 2.23       | 0.243    | 0.772 |
| Dodecanoic acid             | 0.808     | 0.559      | 1.17       | 0.254    | 0.772 |
| Hydroxylamine               | 0.852     | 0.645      | 1.12       | 0.257    | 0.772 |
| Campesterol                 | 0.808     | 0.553      | 1.18       | 0.268    | 0.772 |
| Citric acid                 | 0.809     | 0.541      | 1.21       | 0.303    | 0.824 |
| Eicosapentaenoic acid       | 1.26      | 0.808      | 1.97       | 0.308    | 0.824 |
| 2-hydroxy Isovaleric acid   | 0.843     | 0.589      | 1.21       | 0.351    | 0.9   |
| Tridecanoic acid            | 0.875     | 0.657      | 1.16       | 0.36     | 0.9   |
| L-5-Oxoproline              | 0.841     | 0.573      | 1.23       | 0.375    | 0.904 |
| Heptadecanoic acid (2)      | 0.863     | 0.619      | 1.2        | 0.386    | 0.904 |
| Isoleucine                  | 1.22      | 0.762      | 1.97       | 0.403    | 0.917 |
| 1,3-Propanediol             | 0.893     | 0.66       | 1.21       | 0.46     | 0.977 |
| Glycine                     | 1.15      | 0.778      | 1.71       | 0.476    | 0.977 |
| Leucine                     | 1.16      | 0.754      | 1.78       | 0.503    | 0.977 |
| Serine                      | 1.15      | 0.755      | 1.74       | 0.522    | 0.977 |
| Pyroglutamic acid           | 0.883     | 0.6        | 1.3        | 0.528    | 0.977 |
| Threonine                   | 1.14      | 0.733      | 1.79       | 0.554    | 0.977 |
| Creatinine                  | 1.13      | 0.745      | 1.72       | 0.563    | 0.977 |
| Phenylalanine               | 1.11      | 0.755      | 1.65       | 0.584    | 0.977 |
| 1-Monopalmitin              | 0.916     | 0.668      | 1.26       | 0.587    | 0.977 |
| Glyceric acid               | 1.1       | 0.775      | 1.56       | 0.593    | 0.977 |
| Ribonic acid                | 1.13      | 0.718      | 1.78       | 0.594    | 0.977 |
| Docosaehaenoic acid         | 0.919     | 0.661      | 1.28       | 0.618    | 0.977 |
| Tyrosine                    | 1.11      | 0.719      | 1.72       | 0.634    | 0.977 |
| Bisphenol A                 | 0.91      | 0.613      | 1.35       | 0.639    | 0.977 |
| 2-Palmitoylglycerol         | 1.1       | 0.725      | 1.67       | 0.653    | 0.977 |
| 4-Hydroxybutanoic acid      | 1.09      | 0.743      | 1.59       | 0.67     | 0.977 |
| 3,4-Dihydroxybutanoic acid  | 0.91      | 0.586      | 1.41       | 0.675    | 0.977 |

| Name                       | exp(coef) | Lower 95 % | Upper 95 % | Pr(> z ) | p.adj |
|----------------------------|-----------|------------|------------|----------|-------|
| Ribitol (2)                | 1.1       | 0.683      | 1.78       | 0.691    | 0.977 |
| Malic acid                 | 0.935     | 0.662      | 1.32       | 0.702    | 0.977 |
| Succinic acid              | 1.07      | 0.722      | 1.59       | 0.732    | 0.977 |
| Arachidonic acid           | 1.06      | 0.745      | 1.52       | 0.737    | 0.977 |
| alpha-ketoglutaric acid    | 0.948     | 0.69       | 1.3        | 0.741    | 0.977 |
| Valine                     | 0.936     | 0.623      | 1.41       | 0.75     | 0.977 |
| 3-Indoleacetic acid        | 0.935     | 0.611      | 1.43       | 0.758    | 0.977 |
| Hydroxyproline             | 0.941     | 0.622      | 1.42       | 0.772    | 0.977 |
| 3-Indolepropionic acid     | 0.954     | 0.689      | 1.32       | 0.776    | 0.977 |
| Ribitol (1)                | 0.952     | 0.646      | 1.4        | 0.802    | 0.977 |
| Tartronic acid             | 0.954     | 0.661      | 1.38       | 0.802    | 0.977 |
| 1-Dodecanol                | 0.955     | 0.66       | 1.38       | 0.808    | 0.977 |
| Octanoic acid              | 0.956     | 0.64       | 1.43       | 0.826    | 0.983 |
| Pyruvic acid               | 0.966     | 0.662      | 1.41       | 0.855    | 0.988 |
| Proline                    | 0.969     | 0.65       | 1.45       | 0.878    | 0.988 |
| Cholesterol                | 0.966     | 0.62       | 1.51       | 0.879    | 0.988 |
| Nonadecanoic acid          | 0.975     | 0.654      | 1.45       | 0.899    | 0.988 |
| 2,4-Dihydroxybutanoic acid | 1.02      | 0.658      | 1.6        | 0.913    | 0.988 |
| Glutamic acid              | 1.02      | 0.668      | 1.57       | 0.917    | 0.988 |
| 4-Hydroxyphenyllactic acid | 0.982     | 0.634      | 1.52       | 0.933    | 0.988 |
| Glyceryl-glycoside         | 1.02      | 0.642      | 1.62       | 0.936    | 0.988 |
| Alanine                    | 1.01      | 0.672      | 1.52       | 0.961    | 0.992 |
| Fumaric acid               | 0.992     | 0.668      | 1.47       | 0.968    | 0.992 |
| Heptadecanoic acid (1)     | 0.998     | 0.69       | 1.44       | 0.992    | 0.992 |
| alpha-Tocopherol           | 1         | 0.681      | 1.47       | 0.992    | 0.992 |



### 5.2.3.3 Top-Metabolite from Cross-Sectional Analysis

```
## Call:
## survival::coxph(formula = survival::Surv(time = Amputation.tdiff,
##     event = Amputation.from.DATE) ~ Ribonic_acid + Age.x + Gender.x +
##     Hba1c_baseline + CALSBP + bmi + Smoking + Statin + log_Blood_TGA +
##     Total_cholesterol + egfr, data = data.km)
##
## n= 598, number of events= 28
## (39 observations deleted due to missingness)
##
##              coef exp(coef)  se(coef)      z Pr(>|z|)
## Ribonic_acid    0.125827  1.134086  0.236202  0.533  0.5942
## Age.x           0.024095  1.024387  0.018670  1.291  0.1969
## Gender.x        0.737364  2.090418  0.430898  1.711  0.0870 .
## Hba1c_baseline  0.254205  1.289436  0.147353  1.725  0.0845 .
## CALSBP          0.012769  1.012850  0.010462  1.220  0.2223
## bmi             0.057599  1.059291  0.045924  1.254  0.2098
## Smoking         0.515193  1.673961  0.436684  1.180  0.2381
## Statin          0.579576  1.785282  0.522730  1.109  0.2675
## log_Blood_TGA  0.265712  1.304359  0.307168  0.865  0.3870
## Total_cholesterol 0.007319  1.007346  0.217403  0.034  0.9731
## egfr            -0.013544  0.986547  0.008162 -1.659  0.0970 .
## ---
## Signif. codes:  0 '***' 0.001 '**' 0.01 '*' 0.05 '.' 0.1 ' ' 1
##
##              exp(coef) exp(-coef) lower .95 upper .95
## Ribonic_acid      1.1341    0.8818    0.7138    1.802
## Age.x              1.0244    0.9762    0.9876    1.063
## Gender.x           2.0904    0.4784    0.8984    4.864
## Hba1c_baseline     1.2894    0.7755    0.9660    1.721
## CALSBP             1.0129    0.9873    0.9923    1.034
## bmi                1.0593    0.9440    0.9681    1.159
## Smoking            1.6740    0.5974    0.7113    3.940
## Statin             1.7853    0.5601    0.6409    4.973
## log_Blood_TGA     1.3044    0.7667    0.7144    2.382
## Total_cholesterol  1.0073    0.9927    0.6578    1.543
## egfr               0.9865    1.0136    0.9709    1.002
##
## Concordance= 0.778 (se = 0.032 )
## Likelihood ratio test= 29.28 on 11 df,  p=0.002
## Wald test              = 25.78 on 11 df,  p=0.007
## Score (logrank) test = 28.46 on 11 df,  p=0.003
```

### 5.2.3.3.1 Forest Plot with Clinical Variables

- Top metabolite from cross-sectional analysis



#### 5.2.4 Fully Adjusted Model

#### 5.2.4.1 Forest Plot of Model Coefficients

## NULL

### 5.2.4.2 Table with All Metabolites

| Name                        | exp(coef) | Lower 95 % | Upper 95 % | Pr(> z ) | p.adj |
|-----------------------------|-----------|------------|------------|----------|-------|
| Palmitic acid               | 0.585     | 0.407      | 0.841      | 0.00381  | 0.268 |
| Glycerol (2)                | 0.649     | 0.463      | 0.91       | 0.0123   | 0.268 |
| 3-Hydroxybutyric acid       | 0.581     | 0.378      | 0.895      | 0.0136   | 0.268 |
| 4-Deoxytetronic acid (2)    | 0.637     | 0.442      | 0.917      | 0.0151   | 0.268 |
| 2-Hydroxybutyric acid       | 0.639     | 0.442      | 0.926      | 0.0179   | 0.268 |
| Oleic acid                  | 0.625     | 0.418      | 0.934      | 0.022    | 0.275 |
| Myo inositol                | 0.628     | 0.417      | 0.946      | 0.0262   | 0.28  |
| Lactic acid                 | 0.732     | 0.549      | 0.976      | 0.0335   | 0.314 |
| Stearic acid                | 0.686     | 0.474      | 0.994      | 0.0467   | 0.389 |
| Decanoic acid               | 0.745     | 0.547      | 1.02       | 0.0628   | 0.471 |
| 11-Eicosenoic acid          | 0.718     | 0.497      | 1.04       | 0.0782   | 0.533 |
| Methionine                  | 1.48      | 0.946      | 2.31       | 0.0865   | 0.541 |
| Nonanoic acid               | 0.8       | 0.614      | 1.04       | 0.0976   | 0.563 |
| Aminomalonic acid           | 1.43      | 0.911      | 2.25       | 0.12     | 0.595 |
| Dodecanoic acid             | 0.762     | 0.531      | 1.09       | 0.138    | 0.595 |
| Ethanolamine                | 1.36      | 0.902      | 2.04       | 0.143    | 0.595 |
| Myristoleic acid            | 0.776     | 0.552      | 1.09       | 0.145    | 0.595 |
| Citric acid                 | 0.74      | 0.492      | 1.11       | 0.148    | 0.595 |
| Linoleic acid               | 0.816     | 0.618      | 1.08       | 0.151    | 0.595 |
| Arachidic acid              | 0.745     | 0.491      | 1.13       | 0.167    | 0.605 |
| 4-Hydroxybenzeneacetic acid | 1.42      | 0.857      | 2.36       | 0.173    | 0.605 |
| Benzeneacetic acid          | 1.4       | 0.859      | 2.28       | 0.177    | 0.605 |
| 2-hydroxy Isovaleric acid   | 0.801     | 0.556      | 1.15       | 0.234    | 0.737 |
| Campesterol                 | 0.791     | 0.537      | 1.17       | 0.236    | 0.737 |
| Glycerol (1)                | 0.871     | 0.688      | 1.1        | 0.252    | 0.756 |
| L-5-Oxoproline              | 0.808     | 0.553      | 1.18       | 0.271    | 0.782 |
| Heptadecanoic acid (2)      | 0.833     | 0.595      | 1.17       | 0.288    | 0.799 |
| Hydroxylamine               | 0.863     | 0.649      | 1.15       | 0.309    | 0.829 |
| Tridecanoic acid            | 0.866     | 0.648      | 1.16       | 0.333    | 0.837 |
| 4-Deoxytetronic acid (1)    | 1.25      | 0.796      | 1.96       | 0.335    | 0.837 |
| Arabinopyranose             | 1.26      | 0.765      | 2.07       | 0.365    | 0.878 |
| 3,4-Dihydroxybutanoic acid  | 0.829     | 0.531      | 1.29       | 0.408    | 0.878 |
| 1,3-Propanediol             | 0.88      | 0.648      | 1.2        | 0.414    | 0.878 |
| Malic acid                  | 0.87      | 0.62       | 1.22       | 0.422    | 0.878 |
| Pyroglutamic acid           | 0.855     | 0.581      | 1.26       | 0.425    | 0.878 |
| Serine                      | 1.19      | 0.775      | 1.81       | 0.434    | 0.878 |
| Eicosapentaenoic acid       | 1.2       | 0.758      | 1.89       | 0.44     | 0.878 |
| Isoleucine                  | 1.2       | 0.753      | 1.91       | 0.445    | 0.878 |
| Threonine                   | 1.17      | 0.741      | 1.85       | 0.498    | 0.92  |
| Leucine                     | 1.15      | 0.752      | 1.75       | 0.526    | 0.92  |
| 1-Monopalmitin              | 0.912     | 0.67       | 1.24       | 0.56     | 0.92  |
| Bisphenol A                 | 0.89      | 0.596      | 1.33       | 0.567    | 0.92  |
| Docosaheptaenoic acid       | 0.909     | 0.653      | 1.26       | 0.569    | 0.92  |
| Ribitol (1)                 | 0.894     | 0.607      | 1.32       | 0.569    | 0.92  |
| Phenylalanine               | 1.12      | 0.753      | 1.66       | 0.58     | 0.92  |
| Fumaric acid                | 0.902     | 0.606      | 1.34       | 0.613    | 0.92  |
| 3-Indoleacetic acid         | 0.894     | 0.579      | 1.38       | 0.613    | 0.92  |
| Tyrosine                    | 1.12      | 0.715      | 1.76       | 0.619    | 0.92  |
| Glycine                     | 1.1       | 0.737      | 1.65       | 0.636    | 0.92  |
| 2-Palmitoylglycerol         | 1.1       | 0.722      | 1.67       | 0.661    | 0.92  |

| Name                       | exp(coef) | Lower 95 % | Upper 95 % | Pr(> z ) | p.adj |
|----------------------------|-----------|------------|------------|----------|-------|
| Valine                     | 0.913     | 0.606      | 1.38       | 0.663    | 0.92  |
| Creatinine                 | 1.1       | 0.723      | 1.66       | 0.667    | 0.92  |
| 1-Dodecanol                | 0.922     | 0.634      | 1.34       | 0.669    | 0.92  |
| Cholesterol                | 0.909     | 0.579      | 1.43       | 0.677    | 0.92  |
| Tartronic acid             | 0.924     | 0.637      | 1.34       | 0.679    | 0.92  |
| 3-Indolepropionic acid     | 0.94      | 0.68       | 1.3        | 0.706    | 0.92  |
| 2,4-Dihydroxybutanoic acid | 0.921     | 0.578      | 1.47       | 0.729    | 0.92  |
| Nonadecanoic acid          | 0.934     | 0.633      | 1.38       | 0.733    | 0.92  |
| Glyceric acid              | 1.06      | 0.736      | 1.53       | 0.752    | 0.92  |
| alpha-ketoglutaric acid    | 0.95      | 0.687      | 1.31       | 0.755    | 0.92  |
| Glyceryl-glycoside         | 0.934     | 0.599      | 1.46       | 0.764    | 0.92  |
| 4-Hydroxyphenyllactic acid | 0.934     | 0.59       | 1.48       | 0.772    | 0.92  |
| Arachidonic acid           | 1.06      | 0.734      | 1.52       | 0.773    | 0.92  |
| Hydroxyproline             | 0.944     | 0.618      | 1.44       | 0.788    | 0.923 |
| Octanoic acid              | 0.955     | 0.65       | 1.4        | 0.813    | 0.938 |
| Ribonic acid               | 1.04      | 0.665      | 1.62       | 0.868    | 0.967 |
| alpha-Tocopherol           | 0.969     | 0.656      | 1.43       | 0.875    | 0.967 |
| Alanine                    | 1.03      | 0.68       | 1.57       | 0.882    | 0.967 |
| Proline                    | 0.974     | 0.65       | 1.46       | 0.898    | 0.967 |
| Pyruvic acid               | 0.976     | 0.666      | 1.43       | 0.902    | 0.967 |
| 4-Hydroxybutanoic acid     | 1.02      | 0.694      | 1.5        | 0.92     | 0.972 |
| Succinic acid              | 1.02      | 0.682      | 1.51       | 0.939    | 0.978 |
| Glutamic acid              | 1.01      | 0.657      | 1.56       | 0.952    | 0.978 |
| Heptadecanoic acid (1)     | 0.994     | 0.682      | 1.45       | 0.974    | 0.986 |
| Ribitol (2)                | 0.996     | 0.628      | 1.58       | 0.986    | 0.986 |

### 5.2.4.3 Top-Metabolite from Cross-Sectional Analysis

```
## Call:
## survival::coxph(formula = survival::Surv(time = Amputation.tdiff,
##     event = Amputation.from.DATE) ~ Ribonic_acid + Age.x + Gender.x +
##     Hba1c_baseline + CALSBP + bmi + Smoking + Statin + log_Blood_TGA +
##     Total_cholesterol + egfr + logUAER, data = data.km)
##
## n= 564, number of events= 27
## (73 observations deleted due to missingness)
##
##              coef exp(coef)  se(coef)      z Pr(>|z|)
## Ribonic_acid    0.038446  1.039194  0.230982  0.166  0.8678
## Age.x           0.020683  1.020899  0.020006  1.034  0.3012
## Gender.x        0.709210  2.032385  0.441730  1.606  0.1084
## Hba1c_baseline  0.284992  1.329752  0.149098  1.911  0.0559 .
## CALSBP          0.010211  1.010263  0.011381  0.897  0.3696
## bmi             0.046139  1.047220  0.047343  0.975  0.3298
## Smoking         0.492379  1.636205  0.457500  1.076  0.2818
## Statin          0.471402  1.602239  0.531747  0.887  0.3753
## log_Blood_TGA  0.192918  1.212784  0.315749  0.611  0.5412
## Total_cholesterol 0.004336  1.004345  0.220526  0.020  0.9843
## egfr            -0.016330  0.983803  0.008993 -1.816  0.0694 .
## logUAER         0.024631  1.024936  0.089073  0.277  0.7821
## ---
## Signif. codes:  0 '***' 0.001 '**' 0.01 '*' 0.05 '.' 0.1 ' ' 1
##
##              exp(coef) exp(-coef) lower .95 upper .95
## Ribonic_acid      1.0392    0.9623    0.6608    1.634
## Age.x              1.0209    0.9795    0.9816    1.062
## Gender.x           2.0324    0.4920    0.8551    4.831
## Hba1c_baseline    1.3298    0.7520    0.9928    1.781
## CALSBP             1.0103    0.9898    0.9880    1.033
## bmi                1.0472    0.9549    0.9544    1.149
## Smoking            1.6362    0.6112    0.6674    4.011
## Statin             1.6022    0.6241    0.5651    4.543
## log_Blood_TGA     1.2128    0.8245    0.6532    2.252
## Total_cholesterol 1.0043    0.9957    0.6519    1.547
## egfr               0.9838    1.0165    0.9666    1.001
## logUAER            1.0249    0.9757    0.8608    1.220
##
## Concordance= 0.772 (se = 0.033 )
## Likelihood ratio test= 26.76 on 12 df,  p=0.008
## Wald test              = 24.21 on 12 df,  p=0.02
## Score (logrank) test = 26.96 on 12 df,  p=0.008
```

### 5.2.4.3.1 Forest Plot with Clinical Variables

- Top metabolite from cross-sectional analysis





## 6 Ulcers

### 6.1 Ulcer Diagnosis at DATE

#### 6.1.1 Crude Model

```
## [1] "Fitting models:"  
## [1] "~ Ulcer.diagnosis.at.DATE"  
## [1] ""
```

### 6.1.1.1 Forest Plot of Model Coefficients

## NULL

### 6.1.1.2 Tables of Model Coefficients

```
## [1] ""
## [1] "Table: Ulcer.diagnosis.at.DATEJA"
## [1] " (from model: "
## [1] " ~ Ulcer.diagnosis.at.DATE)"
## [1] ""
## [1] "No significant associations at p.adj < 0.2"
```

### 6.1.1.3 Table with All Metabolites

```
## [1] ""
## [1] "Table: Ulcer.diagnosis.at.DATEJA"
## [1] " (from model: "
## [1] " ~ Ulcer.diagnosis.at.DATE)"
## [1] ""
```

| ##    | Name                           | Coefficient | CI.L    | CI.R  | p.value | p.adj |
|-------|--------------------------------|-------------|---------|-------|---------|-------|
| ## 1  | Ribitol; 71                    | 0.563000    | 0.1070  | 1.020 | 0.0156  | 0.712 |
| ## 2  | Stearic acid, TMS; 2           | 0.514000    | 0.0575  | 0.971 | 0.0273  | 0.712 |
| ## 3  | Palmitic acid, TMS; 5          | 0.496000    | 0.0394  | 0.952 | 0.0333  | 0.712 |
| ## 4  | Glycerol; 58                   | 0.441000    | -0.0160 | 0.897 | 0.0586  | 0.712 |
| ## 5  | Citric acid, 4TMS; 6           | -0.421000   | -0.8780 | 0.035 | 0.0704  | 0.712 |
| ## 6  | Ribonic acid; 72               | 0.415000    | -0.0415 | 0.871 | 0.0748  | 0.712 |
| ## 7  | Myristoleic acid; 65           | 0.413000    | -0.0438 | 0.869 | 0.0764  | 0.712 |
| ## 8  | Succinic acid, 2TMS; 7         | 0.365000    | -0.0916 | 0.821 | 0.1170  | 0.712 |
| ## 9  | Serine, 3TMS; 14               | -0.349000   | -0.8050 | 0.108 | 0.1340  | 0.712 |
| ## 10 | Malic acid, 3TMS; 11           | 0.346000    | -0.1110 | 0.802 | 0.1380  | 0.712 |
| ## 11 | L-5-Oxoproline; 63             | -0.345000   | -0.8010 | 0.112 | 0.1390  | 0.712 |
| ## 12 | Nonadecanoic acid; 66          | 0.340000    | -0.1160 | 0.797 | 0.1440  | 0.712 |
| ## 13 | Tyrosine; 75                   | 0.332000    | -0.1240 | 0.789 | 0.1540  | 0.712 |
| ## 14 | Decanoic acid; 52              | 0.331000    | -0.1260 | 0.787 | 0.1560  | 0.712 |
| ## 15 | 2-Hydroxybutyric acid, 2TMS; 2 | -0.318000   | -0.7750 | 0.138 | 0.1720  | 0.712 |
| ## 16 | Arachidic acid; 46             | 0.313000    | -0.1430 | 0.770 | 0.1790  | 0.712 |
| ## 17 | 1,3-Propanediol; 34            | 0.303000    | -0.1530 | 0.760 | 0.1930  | 0.712 |
| ## 18 | Heptadecanoic acid; 60         | 0.293000    | -0.1640 | 0.749 | 0.2090  | 0.712 |
| ## 19 | 2-hydroxy Isovaleric acid; 38  | -0.291000   | -0.7470 | 0.166 | 0.2120  | 0.712 |
| ## 20 | Myo inositol 6TMS; 1           | 0.287000    | -0.1700 | 0.744 | 0.2180  | 0.712 |
| ## 21 | Oleic acid, TMS; 3             | 0.287000    | -0.1700 | 0.743 | 0.2180  | 0.712 |
| ## 22 | Eicosapentaenoic acid; 55      | 0.275000    | -0.1810 | 0.732 | 0.2370  | 0.712 |
| ## 23 | Benzeneacetic acid; 47         | -0.272000   | -0.7280 | 0.185 | 0.2440  | 0.712 |
| ## 24 | Proline, 2TMS; 21              | 0.269000    | -0.1870 | 0.726 | 0.2470  | 0.712 |
| ## 25 | alpha-ketoglutaric acid, TMS M | 0.267000    | -0.1900 | 0.723 | 0.2530  | 0.712 |
| ## 26 | Methionine, 2TMS; 16           | 0.266000    | -0.1910 | 0.722 | 0.2540  | 0.712 |
| ## 27 | Nonanoic acid; 67              | 0.264000    | -0.1920 | 0.721 | 0.2560  | 0.712 |
| ## 28 | Heptadecanoic acid; 61         | 0.257000    | -0.2000 | 0.713 | 0.2710  | 0.725 |
| ## 29 | Aminomalonic acid; 45          | -0.216000   | -0.6730 | 0.240 | 0.3540  | 0.888 |
| ## 30 | 2,4-Dihydroxybutanoic acid; 28 | 0.215000    | -0.2410 | 0.672 | 0.3550  | 0.888 |
| ## 31 | Tridecanoic acid; 74           | 0.183000    | -0.2730 | 0.640 | 0.4320  | 0.936 |
| ## 32 | Cholesterol, TMS; 23           | -0.178000   | -0.6340 | 0.279 | 0.4450  | 0.936 |
| ## 33 | 11-Eicosenoic acid; 35         | 0.177000    | -0.2800 | 0.633 | 0.4470  | 0.936 |
| ## 34 | Glycine, 3TMS; 17              | -0.175000   | -0.6310 | 0.282 | 0.4530  | 0.936 |
| ## 35 | Ethanolamine; 56               | 0.175000    | -0.2820 | 0.631 | 0.4530  | 0.936 |
| ## 36 | Creatinine; 50                 | 0.173000    | -0.2830 | 0.630 | 0.4570  | 0.936 |
| ## 37 | Isoleucine, 2TMS; 18           | -0.165000   | -0.6210 | 0.292 | 0.4800  | 0.936 |
| ## 38 | 3,4-Dihydroxybutanoic acid; 27 | 0.164000    | -0.2930 | 0.620 | 0.4830  | 0.936 |
| ## 39 | Dodecanoic acid; 54            | 0.162000    | -0.2950 | 0.618 | 0.4870  | 0.936 |
| ## 40 | 4-Hydroxyphenyllactic acid; 44 | 0.155000    | -0.3020 | 0.611 | 0.5070  | 0.950 |
| ## 41 | Glyceryl-glycoside; 59         | -0.141000   | -0.5970 | 0.316 | 0.5460  | 0.955 |
| ## 42 | Linoleic acid, TMS; 4          | -0.134000   | -0.5910 | 0.322 | 0.5640  | 0.955 |
| ## 43 | Pyruvic acid; 31               | 0.134000    | -0.3230 | 0.590 | 0.5660  | 0.955 |
| ## 44 | 3-Hydroxybutyric acid, 2TMS; 1 | 0.130000    | -0.3260 | 0.587 | 0.5760  | 0.955 |
| ## 45 | 4-Hydroxybutanoic acid; 43     | -0.128000   | -0.5850 | 0.328 | 0.5810  | 0.955 |
| ## 46 | Pyroglutamic acid; 69          | 0.127000    | -0.3290 | 0.584 | 0.5860  | 0.955 |

|       |                                |           |         |       |        |       |
|-------|--------------------------------|-----------|---------|-------|--------|-------|
| ## 47 | Campesterol; 49                | -0.091400 | -0.5480 | 0.365 | 0.6950 | 0.999 |
| ## 48 | Arabinopyranose; 51            | 0.088100  | -0.3680 | 0.545 | 0.7050 | 0.999 |
| ## 49 | Bisphenol A; 48                | -0.087600 | -0.5440 | 0.369 | 0.7070 | 0.999 |
| ## 50 | 1-Monopalmitin; 37             | -0.087400 | -0.5440 | 0.369 | 0.7080 | 0.999 |
| ## 51 | Octanoic acid; 68              | 0.084000  | -0.3730 | 0.540 | 0.7180 | 0.999 |
| ## 52 | Glutamic acid, 3TMS; 8         | 0.071300  | -0.3850 | 0.528 | 0.7600 | 0.999 |
| ## 53 | Ribitol; 70                    | 0.070400  | -0.3860 | 0.527 | 0.7620 | 0.999 |
| ## 54 | 2-Palmitoylglycerol; 39        | 0.070400  | -0.3860 | 0.527 | 0.7630 | 0.999 |
| ## 55 | 4-Deoxytetronic acid; 32       | 0.067300  | -0.3890 | 0.524 | 0.7730 | 0.999 |
| ## 56 | Phenylalanine, 2TMS; 13        | 0.066600  | -0.3900 | 0.523 | 0.7750 | 0.999 |
| ## 57 | Alanine, 2TMS; 25              | 0.059300  | -0.3970 | 0.516 | 0.7990 | 0.999 |
| ## 58 | 4-Deoxytetronic acid; 33       | -0.047800 | -0.5040 | 0.409 | 0.8380 | 0.999 |
| ## 59 | Glyceric acid; 30              | -0.044100 | -0.5010 | 0.412 | 0.8500 | 0.999 |
| ## 60 | Fumaric acid, 2TMS; 9          | -0.040100 | -0.4970 | 0.416 | 0.8630 | 0.999 |
| ## 61 | Tartronic acid; 73             | 0.039600  | -0.4170 | 0.496 | 0.8650 | 0.999 |
| ## 62 | alpha-Tocopherol; 26           | -0.034400 | -0.4910 | 0.422 | 0.8830 | 0.999 |
| ## 63 | Arachidonic acid, TMS; 24      | 0.034100  | -0.4220 | 0.491 | 0.8830 | 0.999 |
| ## 64 | Docosahexaenoic acid; 53       | 0.031800  | -0.4250 | 0.488 | 0.8910 | 0.999 |
| ## 65 | Leucine, 2TMS; 19              | 0.031700  | -0.4250 | 0.488 | 0.8920 | 0.999 |
| ## 66 | 1-Dodecanol; 36                | 0.028400  | -0.4280 | 0.485 | 0.9030 | 0.999 |
| ## 67 | 4-Hydroxybenzeneacetic acid; 4 | -0.025400 | -0.4820 | 0.431 | 0.9130 | 0.999 |
| ## 68 | 3-Indolepropionic acid; 41     | -0.022100 | -0.4790 | 0.434 | 0.9240 | 0.999 |
| ## 69 | Threonine, 3TMS; 12            | -0.017700 | -0.4740 | 0.439 | 0.9390 | 0.999 |
| ## 70 | Valine, 2TMS; 20               | -0.014300 | -0.4710 | 0.442 | 0.9510 | 0.999 |
| ## 71 | Hydroxyproline; 64             | -0.008790 | -0.4650 | 0.448 | 0.9700 | 0.999 |
| ## 72 | Hydroxylamine; 62              | 0.004630  | -0.4520 | 0.461 | 0.9840 | 0.999 |
| ## 73 | Glycerol; 57                   | -0.002280 | -0.4590 | 0.454 | 0.9920 | 0.999 |
| ## 74 | Lactic acid; 29                | 0.001630  | -0.4550 | 0.458 | 0.9940 | 0.999 |
| ## 75 | 3-Indoleacetic acid; 40        | -0.000194 | -0.4570 | 0.456 | 0.9990 | 0.999 |

### 6.1.2 Adjusted Model

```
## [1] "Fitting models:"  
## [1] "~ Ulcer.diagnosis.at.DATE + Age.x + Gender.x + Hba1c_baseline + CALSBP + bmi + Smoking + Statin  
## [1] ""
```

### 6.1.2.1 Forest Plot of Model Coefficients

```
## Warning: Ignoring unknown aesthetics: x
## Ignoring unknown aesthetics: x

## NULL
```

### 6.1.2.2 Tables of Model Coefficients

```

## [1] ""
## [1] "Table: Ulcer.diagnosis.at.DATEJA"
## [1] " (from model: "
## [1] " ~ Ulcer.diagnosis.at.DATE + Age.x + Gender.x +"
## [1] "      Hba1c_baseline + CALSBP + bmi + Smoking + Statin +"
## [1] "      log_Blood_TGA + Total_cholesterol)"
## [1] ""
## [1] "No significant associations at p.adj < 0.2"
## [1] ""
## [1] "Table: Age.x"
## [1] " (from model: "
## [1] " ~ Ulcer.diagnosis.at.DATE + Age.x + Gender.x +"
## [1] "      Hba1c_baseline + CALSBP + bmi + Smoking + Statin +"
## [1] "      log_Blood_TGA + Total_cholesterol)"
## [1] ""
##
##          Name Coefficient      CI.L      CI.R  p.value
## 1      Eicosapentaenoic acid; 55  0.02210  1.54e-02  2.88e-02  9.93e-11
## 2  2,4-Dihydroxybutanoic acid; 28  0.01750  1.08e-02  2.42e-02  3.01e-07
## 3  4-Hydroxybenzeneacetic acid; 4   0.01720  1.05e-02  2.39e-02  4.61e-07
## 4      Myo inositol 6TMS; 1         0.01520  8.49e-03  2.19e-02  8.79e-06
## 5      Ribitol; 71                  0.01430  7.63e-03  2.10e-02  2.74e-05
## 6  Docosahexaenoic acid; 53         0.01360  6.93e-03  2.03e-02  6.63e-05
## 7      3-Indoleacetic acid; 40       0.01360  6.89e-03  2.03e-02  6.99e-05
## 8      Ribonic acid; 72              0.01200  5.35e-03  1.87e-02  4.24e-04
## 9      Aminomalonic acid; 45         0.01150  4.77e-03  1.82e-02  7.91e-04
## 10     Ribitol; 70                  0.01100  4.28e-03  1.77e-02  1.32e-03
## 11     Citric acid, 4TMS; 6          0.01080  4.14e-03  1.75e-02  1.51e-03
## 12  3,4-Dihydroxybutanoic acid; 27  0.01070  4.04e-03  1.74e-02  1.68e-03
## 13  alpha-ketoglutaric acid, TMS M  0.01070  4.01e-03  1.74e-02  1.72e-03
## 14     Malic acid, 3TMS; 11          0.01050  3.78e-03  1.72e-02  2.17e-03
## 15     Fumaric acid, 2TMS; 9         0.01050  3.78e-03  1.72e-02  2.18e-03
## 16  4-Hydroxyphenyllactic acid; 44  0.01020  3.53e-03  1.69e-02  2.76e-03
## 17     Pyruvic acid; 31              0.01020  3.52e-03  1.69e-02  2.79e-03
## 18     alpha-Tocopherol; 26          0.01020  3.48e-03  1.69e-02  2.89e-03
## 19     Decanoic acid; 52             0.01010  3.42e-03  1.68e-02  3.08e-03
## 20     Glyceric acid; 30             0.00987  3.17e-03  1.66e-02  3.87e-03
## 21     Succinic acid, 2TMS; 7        0.00951  2.81e-03  1.62e-02  5.39e-03
## 22     Glycine, 3TMS; 17            0.00948  2.79e-03  1.62e-02  5.51e-03
## 23     Pyroglutamic acid; 69        0.00896  2.27e-03  1.57e-02  8.69e-03
## 24     Alanine, 2TMS; 25            0.00865  1.95e-03  1.53e-02  1.13e-02
## 25     11-Eicosenoic acid; 35       0.00855  1.85e-03  1.52e-02  1.23e-02
## 26     Creatinine; 50               0.00808  1.38e-03  1.48e-02  1.80e-02
## 27     Leucine, 2TMS; 19            -0.00779 -1.45e-02 -1.09e-03  2.26e-02
## 28     Valine, 2TMS; 20             -0.00777 -1.45e-02 -1.07e-03  2.29e-02
## 29     Dodecanoic acid; 54          0.00721  5.19e-04  1.39e-02  3.47e-02
## 30     Myristoleic acid; 65         0.00712  4.25e-04  1.38e-02  3.71e-02
## 31     Heptadecanoic acid; 61       0.00701  3.17e-04  1.37e-02  4.01e-02
## 32     Phenylalanine, 2TMS; 13      0.00683  1.32e-04  1.35e-02  4.57e-02
## 33     Benzeneacetic acid; 47       0.00681  1.15e-04  1.35e-02  4.62e-02
## 34     Isoleucine, 2TMS; 18        -0.00678 -1.35e-02 -7.99e-05  4.73e-02
## 35     Tartronic acid; 73          0.00665 -4.17e-05  1.33e-02  5.15e-02
## 36     Glutamic acid, 3TMS; 8      0.00644 -2.57e-04  1.31e-02  5.95e-02

```



|       |                        |          |           |          |          |
|-------|------------------------|----------|-----------|----------|----------|
| ## 37 | Oleic acid, TMS; 3     | 0.00640  | -2.98e-04 | 1.31e-02 | 6.11e-02 |
| ## 38 | Hydroxylamine; 62      | -0.00618 | -1.29e-02 | 5.14e-04 | 7.04e-02 |
| ## 39 | 1-Dodecanol; 36        | -0.00616 | -1.29e-02 | 5.34e-04 | 7.13e-02 |
| ## 40 | L-5-Oxoproline; 63     | 0.00604  | -6.60e-04 | 1.27e-02 | 7.73e-02 |
| ## 41 | Heptadecanoic acid; 60 | 0.00600  | -6.99e-04 | 1.27e-02 | 7.92e-02 |
| ## 42 | Threonine, 3TMS; 12    | -0.00598 | -1.27e-02 | 7.12e-04 | 7.99e-02 |
| ## 43 | Nonadecanoic acid; 66  | 0.00584  | -8.53e-04 | 1.25e-02 | 8.72e-02 |
| ## 44 | Palmitic acid, TMS; 5  | 0.00569  | -1.00e-03 | 1.24e-02 | 9.55e-02 |
| ##    | p.adj                  |          |           |          |          |
| ## 1  |                        | 7.44e-09 |           |          |          |
| ## 2  |                        | 1.13e-05 |           |          |          |
| ## 3  |                        | 1.15e-05 |           |          |          |
| ## 4  |                        | 1.65e-04 |           |          |          |
| ## 5  |                        | 4.11e-04 |           |          |          |
| ## 6  |                        | 7.49e-04 |           |          |          |
| ## 7  |                        | 7.49e-04 |           |          |          |
| ## 8  |                        | 3.97e-03 |           |          |          |
| ## 9  |                        | 6.60e-03 |           |          |          |
| ## 10 |                        | 9.89e-03 |           |          |          |
| ## 11 |                        | 9.93e-03 |           |          |          |
| ## 12 |                        | 9.93e-03 |           |          |          |
| ## 13 |                        | 9.93e-03 |           |          |          |
| ## 14 |                        | 1.09e-02 |           |          |          |
| ## 15 |                        | 1.09e-02 |           |          |          |
| ## 16 |                        | 1.21e-02 |           |          |          |
| ## 17 |                        | 1.21e-02 |           |          |          |
| ## 18 |                        | 1.21e-02 |           |          |          |
| ## 19 |                        | 1.22e-02 |           |          |          |
| ## 20 |                        | 1.45e-02 |           |          |          |
| ## 21 |                        | 1.88e-02 |           |          |          |
| ## 22 |                        | 1.88e-02 |           |          |          |
| ## 23 |                        | 2.83e-02 |           |          |          |
| ## 24 |                        | 3.54e-02 |           |          |          |
| ## 25 |                        | 3.70e-02 |           |          |          |
| ## 26 |                        | 5.20e-02 |           |          |          |
| ## 27 |                        | 6.15e-02 |           |          |          |
| ## 28 |                        | 6.15e-02 |           |          |          |
| ## 29 |                        | 8.97e-02 |           |          |          |
| ## 30 |                        | 9.28e-02 |           |          |          |
| ## 31 |                        | 9.70e-02 |           |          |          |
| ## 32 |                        | 1.04e-01 |           |          |          |
| ## 33 |                        | 1.04e-01 |           |          |          |
| ## 34 |                        | 1.04e-01 |           |          |          |
| ## 35 |                        | 1.10e-01 |           |          |          |
| ## 36 |                        | 1.24e-01 |           |          |          |
| ## 37 |                        | 1.24e-01 |           |          |          |
| ## 38 |                        | 1.37e-01 |           |          |          |
| ## 39 |                        | 1.37e-01 |           |          |          |
| ## 40 |                        | 1.43e-01 |           |          |          |
| ## 41 |                        | 1.43e-01 |           |          |          |
| ## 42 |                        | 1.43e-01 |           |          |          |
| ## 43 |                        | 1.52e-01 |           |          |          |
| ## 44 |                        | 1.63e-01 |           |          |          |
| ##    | [1]                    | ""       |           |          |          |

```

## [1] "Table: Gender.x"
## [1] " (from model: "
## [1] " ~ Ulcer.diagnosis.at.DATE + Age.x + Gender.x +"
## [1] "      Hba1c_baseline + CALSBP + bmi + Smoking + Statin +"
## [1] "      log_Blood_TGA + Total_cholesterol)"
## [1] ""
##
##          Name Coefficient      CI.L      CI.R p.value  p.adj
## 1      Citric acid, 4TMS; 6    -0.395 -0.5520 -0.23700 8.90e-07 6.68e-05
## 2      Methionine, 2TMS; 16     0.381  0.2230  0.53800 2.16e-06 7.24e-05
## 3          Valine, 2TMS; 20     0.376  0.2180  0.53300 2.90e-06 7.24e-05
## 4          Proline, 2TMS; 21     0.366  0.2080  0.52300 5.26e-06 9.26e-05
## 5      Myristoleic acid; 65    -0.363 -0.5200 -0.20600 6.17e-06 9.26e-05
## 6          Leucine, 2TMS; 19     0.353  0.1960  0.51100 1.10e-05 1.37e-04
## 7          Glycine, 3TMS; 17    -0.348 -0.5050 -0.19000 1.50e-05 1.60e-04
## 8      Isoleucine, 2TMS; 18     0.345  0.1880  0.50300 1.71e-05 1.60e-04
## 9          Tartronic acid; 73   -0.343 -0.5010 -0.18600 1.93e-05 1.61e-04
## 10         Glyceric acid; 30    -0.332 -0.4900 -0.17500 3.52e-05 2.45e-04
## 11         Dodecanoic acid; 54  -0.332 -0.4890 -0.17400 3.59e-05 2.45e-04
## 12      4-Deoxytetronic acid; 33  0.313  0.1550  0.47000 9.97e-05 6.23e-04
## 13         Oleic acid, TMS; 3   -0.303 -0.4600 -0.14500 1.65e-04 9.54e-04
## 14      Aminomalonic acid; 45   -0.295 -0.4520 -0.13700 2.41e-04 1.29e-03
## 15 2-hydroxy Isovaleric acid; 38  0.288  0.1310  0.44600 3.34e-04 1.67e-03
## 16      Cholesterol, TMS; 23    -0.276 -0.4340 -0.11900 5.77e-04 2.71e-03
## 17      Tridecanoic acid; 74    -0.260 -0.4170 -0.10200 1.22e-03 5.06e-03
## 18      Glutamic acid, 3TMS; 8   0.259  0.1020  0.41600 1.27e-03 5.06e-03
## 19      Myo inositol 6TMS; 1    -0.257 -0.4150 -0.10000 1.35e-03 5.06e-03
## 20      Heptadecanoic acid; 60  -0.257 -0.4140 -0.09930 1.39e-03 5.06e-03
## 21      Docosahexaenoic acid; 53 -0.255 -0.4130 -0.09810 1.47e-03 5.06e-03
## 22         Decanoic acid; 52    -0.255 -0.4130 -0.09780 1.48e-03 5.06e-03
## 23      Heptadecanoic acid; 61  -0.248 -0.4060 -0.09100 1.98e-03 6.47e-03
## 24      Succinic acid, 2TMS; 7   -0.246 -0.4040 -0.08900 2.15e-03 6.72e-03
## 25      Nonadecanoic acid; 66   -0.225 -0.3820 -0.06770 5.08e-03 1.52e-02
## 26      Palmitic acid, TMS; 5    -0.213 -0.3700 -0.05530 8.10e-03 2.34e-02
## 27      Stearic acid, TMS; 2    -0.207 -0.3650 -0.04990 9.84e-03 2.73e-02
## 28      Benzeneacetic acid; 47   -0.195 -0.3520 -0.03740 1.53e-02 4.09e-02
## 29      Hydroxyproline; 64       0.182  0.0246  0.33900 2.34e-02 6.06e-02
## 30      1-Monopalmitin; 37       0.176  0.0189  0.33400 2.82e-02 7.04e-02
## 31      11-Eicosenoic acid; 35  -0.172 -0.3300 -0.01480 3.20e-02 7.75e-02
## 32         Ribonic acid; 72    -0.166 -0.3230 -0.00868 3.86e-02 8.89e-02
## 33         Tyrosine; 75       -0.166 -0.3230 -0.00829 3.91e-02 8.89e-02
## 34         Nonanoic acid; 67   -0.162 -0.3200 -0.00499 4.32e-02 9.52e-02
## 35         Pyruvic acid; 31     0.150 -0.0069  0.30800 6.09e-02 1.31e-01
## 36      Arachidonic acid, TMS; 24 -0.143 -0.3000  0.01460 7.54e-02 1.57e-01
## 37         Glycerol; 57       -0.139 -0.2960  0.01870 8.43e-02 1.71e-01
## [1] ""
## [1] "Table: Hba1c_baseline"
## [1] " (from model: "
## [1] " ~ Ulcer.diagnosis.at.DATE + Age.x + Gender.x +"
## [1] "      Hba1c_baseline + CALSBP + bmi + Smoking + Statin +"
## [1] "      log_Blood_TGA + Total_cholesterol)"
## [1] ""
##
##          Name Coefficient      CI.L      CI.R p.value  p.adj
## 1      Tridecanoic acid; 74    -0.1280 -0.19900 -0.05650 0.000440 0.0166
## 2      Arabinopyranose; 51     0.1260  0.05500  0.19700 0.000510 0.0166

```

```

## 3  Eicosapentaenoic acid; 55  -0.1240 -0.19500 -0.05240 0.000665 0.0166
## 4  Ethanolamine; 56  0.1160 0.04440 0.18700 0.001460 0.0232
## 5  Glyceric acid; 30  -0.1130 -0.18500 -0.04230 0.001770 0.0232
## 6  Docosahexaenoic acid; 53  -0.1130 -0.18400 -0.04190 0.001860 0.0232
## 7  Valine, 2TMS; 20  0.1090 0.03780 0.18000 0.002690 0.0288
## 8  Alanine, 2TMS; 25  0.1070 0.03610 0.17800 0.003130 0.0294
## 9  Decanoic acid; 52  -0.0945 -0.16600 -0.02330 0.009250 0.0770
## 10 4-Hydroxybutanoic acid; 43  -0.0898 -0.16100 -0.01860 0.013400 0.1010
## 11 11-Eicosenoic acid; 35  -0.0827 -0.15400 -0.01150 0.022800 0.1550
## 12 Lactic acid; 29  0.0801 0.00889 0.15100 0.027500 0.1720
## 13 Myristoleic acid; 65  -0.0766 -0.14800 -0.00542 0.034900 0.1910
## 14 Citric acid, 4TMS; 6  0.0754 0.00425 0.14700 0.037800 0.1910
## 15 Tartronic acid; 73  -0.0752 -0.14600 -0.00407 0.038300 0.1910
## [1] ""
## [1] "Table: CALSBP"
## [1] " (from model: "
## [1] " ~ Ulcer.diagnosis.at.DATE + Age.x + Gender.x +"
## [1] " Hba1c_baseline + CALSBP + bmi + Smoking + Statin +"
## [1] " log_Blood_TGA + Total_cholesterol)"
## [1] ""
##
## Name Coefficient CI.L CI.R p.value p.adj
## 1 Myristoleic acid; 65 0.00809 0.00341 0.01280 0.000695 0.0521
## 2 Glyceric acid; 30 -0.00666 -0.01130 -0.00199 0.005210 0.1960
## [1] ""
## [1] "Table: bmi"
## [1] " (from model: "
## [1] " ~ Ulcer.diagnosis.at.DATE + Age.x + Gender.x +"
## [1] " Hba1c_baseline + CALSBP + bmi + Smoking + Statin +"
## [1] " log_Blood_TGA + Total_cholesterol)"
## [1] ""
##
## Name Coefficient CI.L CI.R p.value
## 1 Glutamic acid, 3TMS; 8 0.0450 0.02440 0.06560 1.89e-05
## 2 Campesterol; 49 -0.0396 -0.06020 -0.01900 1.66e-04
## 3 2-Hydroxybutyric acid, 2TMS; 2 0.0385 0.01790 0.05910 2.54e-04
## 4 Pyruvic acid; 31 -0.0304 -0.05100 -0.00979 3.85e-03
## 5 Decanoic acid; 52 -0.0297 -0.05030 -0.00911 4.71e-03
## 6 Lactic acid; 29 0.0295 0.00885 0.05010 5.09e-03
## 7 Arachidic acid; 46 -0.0290 -0.04960 -0.00841 5.79e-03
## 8 1,3-Propanediol; 34 -0.0285 -0.04910 -0.00785 6.80e-03
## 9 alpha-Tocopherol; 26 -0.0274 -0.04800 -0.00679 9.18e-03
## 10 2,4-Dihydroxybutanoic acid; 28 -0.0247 -0.04530 -0.00411 1.88e-02
## 11 Pyroglutamic acid; 69 -0.0243 -0.04500 -0.00374 2.06e-02
## 12 Citric acid, 4TMS; 6 -0.0236 -0.04420 -0.00297 2.49e-02
## 13 Ribitol; 70 0.0231 0.00253 0.04380 2.78e-02
## 14 alpha-ketoglutaric acid, TMS M -0.0220 -0.04260 -0.00138 3.65e-02
## p.adj
## 1 0.00142
## 2 0.00622
## 3 0.00635
## 4 0.06200
## 5 0.06200
## 6 0.06200
## 7 0.06200
## 8 0.06380

```

```

## 9 0.07650
## 10 0.14100
## 11 0.14100
## 12 0.15600
## 13 0.16000
## 14 0.19500
## [1] ""
## [1] "Table: Smoking"
## [1] " (from model: "
## [1] " ~ Ulcer.diagnosis.at.DATE + Age.x + Gender.x +"
## [1] " Hba1c_baseline + CALSBP + bmi + Smoking + Statin +"
## [1] " log_Blood_TGA + Total_cholesterol)"
## [1] ""
##
## Name Coefficient CI.L CI.R p.value p.adj
## 1 Glutamic acid, 3TMS; 8 0.385 0.1920 0.57800 9.29e-05 0.00618
## 2 3-Indolepropionic acid; 41 -0.362 -0.5550 -0.17000 2.31e-04 0.00618
## 3 Docosahexaenoic acid; 53 -0.361 -0.5540 -0.16800 2.47e-04 0.00618
## 4 Tartronic acid; 73 -0.353 -0.5450 -0.16000 3.41e-04 0.00639
## 5 Glyceric acid; 30 -0.326 -0.5190 -0.13300 9.30e-04 0.01390
## 6 Citric acid, 4TMS; 6 -0.309 -0.5020 -0.11600 1.71e-03 0.02140
## 7 alpha-Tocopherol; 26 -0.293 -0.4860 -0.09990 2.93e-03 0.03140
## 8 Benzeneacetic acid; 47 -0.282 -0.4750 -0.08960 4.11e-03 0.03850
## 9 Ribonic acid; 72 -0.274 -0.4670 -0.08150 5.30e-03 0.04400
## 10 Malic acid, 3TMS; 11 -0.268 -0.4610 -0.07520 6.44e-03 0.04400
## 11 Valine, 2TMS; 20 -0.266 -0.4590 -0.07310 6.89e-03 0.04400
## 12 Campesterol; 49 -0.265 -0.4580 -0.07240 7.04e-03 0.04400
## 13 3-Indoleacetic acid; 40 -0.236 -0.4290 -0.04350 1.63e-02 0.09420
## 14 4-Hydroxyphenyllactic acid; 44 -0.228 -0.4210 -0.03480 2.07e-02 0.11100
## 15 Leucine, 2TMS; 19 -0.208 -0.4010 -0.01540 3.43e-02 0.15700
## 16 Ribitol; 70 0.207 0.0144 0.40000 3.51e-02 0.15700
## 17 Heptadecanoic acid; 60 -0.207 -0.4000 -0.01400 3.55e-02 0.15700
## 18 Heptadecanoic acid; 61 -0.200 -0.3930 -0.00688 4.24e-02 0.17700
## [1] ""
## [1] "Table: Statin"
## [1] " (from model: "
## [1] " ~ Ulcer.diagnosis.at.DATE + Age.x + Gender.x +"
## [1] " Hba1c_baseline + CALSBP + bmi + Smoking + Statin +"
## [1] " log_Blood_TGA + Total_cholesterol)"
## [1] ""
##
## Name Coefficient CI.L CI.R p.value p.adj
## 1 L-5-Oxoproline; 63 -0.323 -0.4970 -0.1490 0.000279 0.0209
## 2 Campesterol; 49 0.255 0.0812 0.4290 0.004060 0.1520
## 3 Arachidonic acid, TMS; 24 0.213 0.0388 0.3870 0.016500 0.1900
## 4 Arachidic acid; 46 -0.212 -0.3860 -0.0379 0.017000 0.1900
## 5 Glutamic acid, 3TMS; 8 0.211 0.0372 0.3850 0.017400 0.1900
## 6 Heptadecanoic acid; 61 -0.210 -0.3840 -0.0359 0.018100 0.1900
## 7 Cholesterol, TMS; 23 -0.208 -0.3820 -0.0334 0.019500 0.1900
## 8 Ribitol; 70 0.203 0.0292 0.3770 0.022100 0.1900
## 9 Aminomalonic acid; 45 -0.200 -0.3740 -0.0256 0.024500 0.1900
## 10 Dodecanoic acid; 54 -0.197 -0.3710 -0.0231 0.026400 0.1900
## 11 Linoleic acid, TMS; 4 -0.192 -0.3660 -0.0182 0.030400 0.1900
## 12 Ribitol; 71 0.191 0.0173 0.3660 0.031200 0.1900
## 13 Valine, 2TMS; 20 -0.189 -0.3640 -0.0153 0.033000 0.1900
## 14 2,4-Dihydroxybutanoic acid; 28 0.187 0.0128 0.3610 0.035400 0.1900

```

```

## [1] ""
## [1] "Table: log_Blood_TGA"
## [1] " (from model: "
## [1] " ~ Ulcer.diagnosis.at.DATE + Age.x + Gender.x +"
## [1] "      Hba1c_baseline + CALSBP + bmi + Smoking + Statin +"
## [1] "      log_Blood_TGA + Total_cholesterol)"
## [1] ""
##
##              Name Coefficient      CI.L      CI.R  p.value
## 1      Dodecanoic acid; 54      0.275  0.14600  0.40400  2.86e-05
## 2      Palmitic acid, TMS; 5      0.274  0.14500  0.40300  3.23e-05
## 3      Decanoic acid; 52      0.254  0.12500  0.38300  1.17e-04
## 4      Stearic acid, TMS; 2      0.253  0.12400  0.38200  1.23e-04
## 5      Arachidic acid; 46      0.249  0.12000  0.37800  1.55e-04
## 6      Octanoic acid; 68      0.236  0.10700  0.36500  3.34e-04
## 7      3,4-Dihydroxybutanoic acid; 27      0.229  0.10000  0.35800  5.01e-04
## 8      Ribonic acid; 72      0.220  0.09120  0.34900  8.21e-04
## 9      Glyceryl-glycoside; 59      0.220  0.09090  0.34900  8.36e-04
## 10     4-Hydroxybenzeneacetic acid; 4      0.213  0.08380  0.34200  1.22e-03
## 11     Oleic acid, TMS; 3      0.209  0.07990  0.33800  1.50e-03
## 12     Ribitol; 71      0.197  0.06800  0.32600  2.76e-03
## 13     Arabinopyranose; 51      0.192  0.06250  0.32100  3.62e-03
## 14     Heptadecanoic acid; 60      0.184  0.05500  0.31300  5.19e-03
## 15     2-Hydroxybutyric acid, 2TMS; 2      0.181  0.05150  0.31000  6.09e-03
## 16     Lactic acid; 29      0.171  0.04240  0.30000  9.21e-03
## 17     2,4-Dihydroxybutanoic acid; 28      0.171  0.04170  0.30000  9.52e-03
## 18     Heptadecanoic acid; 61      0.169  0.04000  0.29800  1.02e-02
## 19     Fumaric acid, 2TMS; 9      0.163  0.03430  0.29200  1.31e-02
## 20     Glutamic acid, 3TMS; 8      0.160  0.03140  0.28900  1.48e-02
## 21     Pyruvic acid; 31      0.160  0.03070  0.28900  1.53e-02
## 22     Aminomalonic acid; 45      -0.157 -0.28600 -0.02810  1.70e-02
## 23     Myristoleic acid; 65      0.157  0.02800  0.28600  1.71e-02
## 24     Isoleucine, 2TMS; 18      0.156  0.02750  0.28500  1.74e-02
## 25     Valine, 2TMS; 20      0.156  0.02720  0.28500  1.76e-02
## 26     4-Hydroxybutanoic acid; 43      0.156  0.02700  0.28500  1.78e-02
## 27     Myo inositol 6TMS; 1      0.156  0.02660  0.28500  1.81e-02
## 28     4-Deoxytetrionic acid; 33      0.153  0.02410  0.28200  2.00e-02
## 29     Malic acid, 3TMS; 11      0.152  0.02330  0.28100  2.07e-02
## 30     alpha-ketoglutaric acid, TMS M      0.152  0.02280  0.28100  2.11e-02
## 31     3-Indolepropionic acid; 41      -0.142 -0.27100 -0.01280  3.13e-02
## 32     Succinic acid, 2TMS; 7      0.138  0.00943  0.26700  3.54e-02
## 33     Glyceric acid; 30      -0.138 -0.26700 -0.00915  3.58e-02
## 34     Leucine, 2TMS; 19      0.137  0.00848  0.26600  3.67e-02
## 35     Proline, 2TMS; 21      0.135  0.00604  0.26400  4.02e-02
## 36     Arachidonic acid, TMS; 24      0.135  0.00559  0.26400  4.09e-02
## 37     Nonadecanoic acid; 66      0.124 -0.00490  0.25300  5.94e-02
## 38     Tartronic acid; 73      -0.123 -0.25200  0.00570  6.10e-02
## 39     1,3-Propanediol; 34      0.117 -0.01230  0.24600  7.63e-02
## 40     Serine, 3TMS; 14      -0.116 -0.24500  0.01290  7.77e-02
## 41     3-Hydroxybutyric acid, 2TMS; 1      0.115 -0.01440  0.24400  8.16e-02
## 42     Tridecanoic acid; 74      0.114 -0.01480  0.24300  8.28e-02
## 43     3-Indoleacetic acid; 40      0.112 -0.01690  0.24100  8.85e-02
## 44     Nonanoic acid; 67      0.107 -0.02220  0.23600  1.05e-01
##
##      p.adj
## 1  0.00121

```

```

## 2 0.00121
## 3 0.00230
## 4 0.00230
## 5 0.00232
## 6 0.00417
## 7 0.00537
## 8 0.00696
## 9 0.00696
## 10 0.00918
## 11 0.01020
## 12 0.01720
## 13 0.02090
## 14 0.02780
## 15 0.03040
## 16 0.04200
## 17 0.04200
## 18 0.04270
## 19 0.05030
## 20 0.05030
## 21 0.05030
## 22 0.05030
## 23 0.05030
## 24 0.05030
## 25 0.05030
## 26 0.05030
## 27 0.05030
## 28 0.05260
## 29 0.05260
## 30 0.05260
## 31 0.07560
## 32 0.08100
## 33 0.08100
## 34 0.08100
## 35 0.08520
## 36 0.08520
## 37 0.12000
## 38 0.12000
## 39 0.14600
## 40 0.14600
## 41 0.14800
## 42 0.14800
## 43 0.15400
## 44 0.17900
## [1] ""
## [1] "Table: Total_cholesterol"
## [1] " (from model: "
## [1] " ~ Ulcer.diagnosis.at.DATE + Age.x + Gender.x +"
## [1] "      Hba1c_baseline + CALSBP + bmi + Smoking + Statin +"
## [1] "      log_Blood_TGA + Total_cholesterol)"
## [1] ""
##
##              Name Coefficient      CI.L      CI.R  p.value
## 1      Cholesterol, TMS; 23      0.4640  0.367000  0.56000  4.49e-21
## 2              Campesterol; 49      0.3700  0.274000  0.46700  5.31e-14
## 3      alpha-Tocopherol; 26      0.3290  0.232000  0.42500  2.38e-11

```

|       |                                |          |           |          |          |
|-------|--------------------------------|----------|-----------|----------|----------|
| ## 4  | Benzeneacetic acid; 47         | -0.1900  | -0.286000 | -0.09340 | 1.14e-04 |
| ## 5  | 4-Hydroxybutanoic acid; 43     | -0.1820  | -0.278000 | -0.08560 | 2.15e-04 |
| ## 6  | Linoleic acid, TMS; 4          | 0.1820   | 0.085200  | 0.27800  | 2.22e-04 |
| ## 7  | Proline, 2TMS; 21              | -0.1740  | -0.271000 | -0.07800 | 3.93e-04 |
| ## 8  | 2,4-Dihydroxybutanoic acid; 28 | -0.1700  | -0.267000 | -0.07400 | 5.30e-04 |
| ## 9  | Glycine, 3TMS; 17              | -0.1690  | -0.265000 | -0.07250 | 5.93e-04 |
| ## 10 | L-5-Oxoproline; 63             | -0.1610  | -0.257000 | -0.06430 | 1.09e-03 |
| ## 11 | 4-Hydroxybenzeneacetic acid; 4 | -0.1550  | -0.252000 | -0.05880 | 1.61e-03 |
| ## 12 | Ribitol; 71                    | -0.1490  | -0.246000 | -0.05280 | 2.42e-03 |
| ## 13 | Docosahexaenoic acid; 53       | 0.1490   | 0.052200  | 0.24500  | 2.52e-03 |
| ## 14 | Eicosapentaenoic acid; 55      | 0.1480   | 0.051600  | 0.24400  | 2.61e-03 |
| ## 15 | Tyrosine; 75                   | -0.1460  | -0.243000 | -0.05000 | 2.92e-03 |
| ## 16 | Isoleucine, 2TMS; 18           | -0.1460  | -0.243000 | -0.04970 | 2.97e-03 |
| ## 17 | Glyceryl-glycoside; 59         | -0.1430  | -0.240000 | -0.04690 | 3.57e-03 |
| ## 18 | Arabinopyranose; 51            | -0.1420  | -0.239000 | -0.04580 | 3.83e-03 |
| ## 19 | Alanine, 2TMS; 25              | -0.1420  | -0.238000 | -0.04530 | 3.96e-03 |
| ## 20 | 2-Palmitoylglycerol; 39        | 0.1380   | 0.041700  | 0.23400  | 4.99e-03 |
| ## 21 | Methionine, 2TMS; 16           | -0.1380  | -0.234000 | -0.04130 | 5.11e-03 |
| ## 22 | Threonine, 3TMS; 12            | -0.1340  | -0.230000 | -0.03760 | 6.44e-03 |
| ## 23 | Ribonic acid; 72               | -0.1330  | -0.230000 | -0.03700 | 6.70e-03 |
| ## 24 | 3-Indoleacetic acid; 40        | -0.1290  | -0.226000 | -0.03280 | 8.65e-03 |
| ## 25 | Hydroxylamine; 62              | -0.1250  | -0.221000 | -0.02870 | 1.10e-02 |
| ## 26 | 3,4-Dihydroxybutanoic acid; 27 | -0.1170  | -0.214000 | -0.02090 | 1.71e-02 |
| ## 27 | Malic acid, 3TMS; 11           | -0.1090  | -0.206000 | -0.01300 | 2.62e-02 |
| ## 28 | Phenylalanine, 2TMS; 13        | -0.1090  | -0.205000 | -0.01210 | 2.74e-02 |
| ## 29 | Serine, 3TMS; 14               | -0.1080  | -0.204000 | -0.01140 | 2.83e-02 |
| ## 30 | Pyruvic acid; 31               | -0.1010  | -0.197000 | -0.00441 | 4.04e-02 |
| ## 31 | Myo inositol 6TMS; 1           | -0.0997  | -0.196000 | -0.00326 | 4.28e-02 |
| ## 32 | 2-Hydroxybutyric acid, 2TMS; 2 | 0.0962   | -0.000213 | 0.19300  | 5.05e-02 |
| ## 33 | Palmitic acid, TMS; 5          | 0.0933   | -0.003080 | 0.19000  | 5.78e-02 |
| ## 34 | 3-Indolepropionic acid; 41     | 0.0861   | -0.010300 | 0.18200  | 8.01e-02 |
| ## 35 | 1,3-Propanediol; 34            | -0.0858  | -0.182000 | 0.01060  | 8.10e-02 |
| ## 36 | Ethanolamine; 56               | -0.0827  | -0.179000 | 0.01370  | 9.27e-02 |
| ##    | p.adj                          |          |           |          |          |
| ## 1  |                                | 3.37e-19 |           |          |          |
| ## 2  |                                | 1.99e-12 |           |          |          |
| ## 3  |                                | 5.95e-10 |           |          |          |
| ## 4  |                                | 2.14e-03 |           |          |          |
| ## 5  |                                | 2.78e-03 |           |          |          |
| ## 6  |                                | 2.78e-03 |           |          |          |
| ## 7  |                                | 4.21e-03 |           |          |          |
| ## 8  |                                | 4.94e-03 |           |          |          |
| ## 9  |                                | 4.94e-03 |           |          |          |
| ## 10 |                                | 8.15e-03 |           |          |          |
| ## 11 |                                | 1.10e-02 |           |          |          |
| ## 12 |                                | 1.39e-02 |           |          |          |
| ## 13 |                                | 1.39e-02 |           |          |          |
| ## 14 |                                | 1.39e-02 |           |          |          |
| ## 15 |                                | 1.39e-02 |           |          |          |
| ## 16 |                                | 1.39e-02 |           |          |          |
| ## 17 |                                | 1.56e-02 |           |          |          |
| ## 18 |                                | 1.56e-02 |           |          |          |
| ## 19 |                                | 1.56e-02 |           |          |          |
| ## 20 |                                | 1.82e-02 |           |          |          |

## 21 1.82e-02  
## 22 2.19e-02  
## 23 2.19e-02  
## 24 2.70e-02  
## 25 3.30e-02  
## 26 4.94e-02  
## 27 7.28e-02  
## 28 7.33e-02  
## 29 7.33e-02  
## 30 1.01e-01  
## 31 1.03e-01  
## 32 1.18e-01  
## 33 1.31e-01  
## 34 1.74e-01  
## 35 1.74e-01  
## 36 1.93e-01



### 6.1.2.3 Table with All Metabolites

```

## [1] ""
## [1] "Table: Ulcer.diagnosis.at.DATEJA"
## [1] " (from model: "
## [1] " ~ Ulcer.diagnosis.at.DATE + Age.x + Gender.x +"
## [1] "      Hba1c_baseline + CALSBP + bmi + Smoking + Statin +"
## [1] "      log_Blood_TGA + Total_cholesterol)"
## [1] ""
##
##          Name Coefficient   CI.L   CI.R p.value p.adj
## 1          Citric acid, 4TMS; 6  -0.567000 -1.050 -0.0878 0.0204 0.986
## 2 2-Hydroxybutyric acid, 2TMS; 2  -0.425000 -0.904 0.0546 0.0825 0.986
## 3 2-hydroxy Isovaleric acid; 38  -0.357000 -0.837 0.1220 0.1440 0.986
## 4          Cholesterol, TMS; 23  -0.343000 -0.823 0.1360 0.1610 0.986
## 5          Benzeneacetic acid; 47  -0.339000 -0.819 0.1400 0.1650 0.986
## 6              Ribitol; 71       0.338000 -0.141 0.8180 0.1670 0.986
## 7              Tyrosine; 75       0.335000 -0.144 0.8140 0.1710 0.986
## 8              Serine, 3TMS; 14   -0.326000 -0.805 0.1540 0.1830 0.986
## 9              Glycerol; 58      0.314000 -0.165 0.7940 0.1990 0.986
## 10             Nonanoic acid; 67   0.303000 -0.176 0.7820 0.2160 0.986
## 11             L-5-Oxoproline; 63  -0.296000 -0.776 0.1830 0.2260 0.986
## 12             Palmitic acid, TMS; 5 0.286000 -0.194 0.7650 0.2430 0.986
## 13             Nonadecanoic acid; 66 0.282000 -0.197 0.7620 0.2490 0.986
## 14             Glyceryl-glycoside; 59 -0.267000 -0.747 0.2120 0.2750 0.986
## 15 4-Deoxytetric acid; 33         -0.267000 -0.746 0.2120 0.2750 0.986
## 16             Myristoleic acid; 65  0.258000 -0.221 0.7380 0.2910 0.986
## 17             Heptadecanoic acid; 61 0.252000 -0.227 0.7320 0.3020 0.986
## 18             alpha-Tocopherol; 26  -0.249000 -0.728 0.2310 0.3090 0.986
## 19             Malic acid, 3TMS; 11  0.234000 -0.245 0.7140 0.3380 0.986
## 20             Ribonic acid; 72     0.234000 -0.246 0.7130 0.3400 0.986
## 21             Methionine, 2TMS; 16  0.230000 -0.249 0.7100 0.3460 0.986
## 22 4-Hydroxybenzeneacetic acid; 4  -0.226000 -0.705 0.2540 0.3560 0.986
## 23             Stearic acid, TMS; 2  0.224000 -0.256 0.7030 0.3600 0.986
## 24             Aminomalonic acid; 45  -0.205000 -0.684 0.2740 0.4020 0.986
## 25             1,3-Propanediol; 34   0.200000 -0.280 0.6790 0.4140 0.986
## 26              Ribitol; 70        -0.197000 -0.677 0.2820 0.4200 0.986
## 27             Glyceric acid; 30     -0.191000 -0.670 0.2890 0.4360 0.986
## 28             Tridecanoic acid; 74   0.187000 -0.292 0.6670 0.4440 0.986
## 29             Glutamic acid, 3TMS; 8 -0.178000 -0.657 0.3020 0.4680 0.986
## 30             Fumaric acid, 2TMS; 9  -0.177000 -0.656 0.3030 0.4700 0.986
## 31             1-Monopalmitin; 37    -0.176000 -0.655 0.3040 0.4730 0.986
## 32             Docosahexaenoic acid; 53 -0.172000 -0.652 0.3070 0.4820 0.986
## 33             Isoleucine, 2TMS; 18   -0.170000 -0.650 0.3090 0.4860 0.986
## 34             Campesterol; 49       -0.170000 -0.650 0.3090 0.4870 0.986
## 35 2,4-Dihydroxybutanoic acid; 28  -0.154000 -0.634 0.3250 0.5280 0.986
## 36 alpha-ketoglutaric acid, TMS M  0.152000 -0.327 0.6310 0.5340 0.986
## 37             Ethanolamine; 56      0.152000 -0.328 0.6310 0.5350 0.986
## 38             Proline, 2TMS; 21     0.151000 -0.329 0.6300 0.5380 0.986
## 39             Heptadecanoic acid; 60  0.144000 -0.335 0.6240 0.5550 0.986
## 40             3-Indoleacetic acid; 40 -0.144000 -0.623 0.3350 0.5560 0.986
## 41             11-Eicosenoic acid; 35  0.142000 -0.337 0.6210 0.5620 0.986
## 42             Arachidic acid; 46     0.142000 -0.337 0.6210 0.5620 0.986
## 43             Succinic acid, 2TMS; 7  0.139000 -0.340 0.6190 0.5690 0.986
## 44             Hydroxylamine; 62     0.130000 -0.350 0.6090 0.5960 0.986

```

|       |                                |           |        |        |        |       |
|-------|--------------------------------|-----------|--------|--------|--------|-------|
| ## 45 | Bisphenol A; 48                | -0.123000 | -0.603 | 0.3560 | 0.6140 | 0.986 |
| ## 46 | Decanoic acid; 52              | 0.120000  | -0.359 | 0.6000 | 0.6230 | 0.986 |
| ## 47 | Myo inositol 6TMS; 1           | 0.117000  | -0.362 | 0.5960 | 0.6320 | 0.986 |
| ## 48 | Tartronic acid; 73             | -0.107000 | -0.587 | 0.3720 | 0.6610 | 0.986 |
| ## 49 | 4-Hydroxybutanoic acid; 43     | -0.106000 | -0.585 | 0.3740 | 0.6650 | 0.986 |
| ## 50 | Glycine, 3TMS; 17              | -0.102000 | -0.582 | 0.3770 | 0.6750 | 0.986 |
| ## 51 | Linoleic acid, TMS; 4          | -0.102000 | -0.582 | 0.3770 | 0.6760 | 0.986 |
| ## 52 | Oleic acid, TMS; 3             | 0.098700  | -0.381 | 0.5780 | 0.6870 | 0.986 |
| ## 53 | 3,4-Dihydroxybutanoic acid; 27 | -0.090600 | -0.570 | 0.3890 | 0.7110 | 0.986 |
| ## 54 | 2-Palmitoylglycerol; 39        | -0.090300 | -0.570 | 0.3890 | 0.7120 | 0.986 |
| ## 55 | 1-Dodecanol; 36                | 0.086100  | -0.393 | 0.5660 | 0.7250 | 0.986 |
| ## 56 | 4-Hydroxyphenyllactic acid; 44 | -0.082500 | -0.562 | 0.3970 | 0.7360 | 0.986 |
| ## 57 | Threonine, 3TMS; 12            | 0.071200  | -0.408 | 0.5510 | 0.7710 | 0.997 |
| ## 58 | Eicosapentaenoic acid; 55      | 0.060800  | -0.419 | 0.5400 | 0.8040 | 0.997 |
| ## 59 | Octanoic acid; 68              | 0.060000  | -0.419 | 0.5390 | 0.8060 | 0.997 |
| ## 60 | Valine, 2TMS; 20               | -0.052900 | -0.532 | 0.4270 | 0.8290 | 0.997 |
| ## 61 | Creatinine; 50                 | 0.049400  | -0.430 | 0.5290 | 0.8400 | 0.997 |
| ## 62 | Hydroxyproline; 64             | -0.047300 | -0.527 | 0.4320 | 0.8470 | 0.997 |
| ## 63 | Alanine, 2TMS; 25              | -0.046500 | -0.526 | 0.4330 | 0.8490 | 0.997 |
| ## 64 | Arachidonic acid, TMS; 24      | -0.040900 | -0.520 | 0.4390 | 0.8670 | 0.997 |
| ## 65 | Leucine, 2TMS; 19              | 0.037100  | -0.442 | 0.5170 | 0.8790 | 0.997 |
| ## 66 | Phenylalanine, 2TMS; 13        | -0.026600 | -0.506 | 0.4530 | 0.9130 | 0.997 |
| ## 67 | Lactic acid; 29                | -0.026500 | -0.506 | 0.4530 | 0.9140 | 0.997 |
| ## 68 | Pyruvic acid; 31               | 0.024500  | -0.455 | 0.5040 | 0.9200 | 0.997 |
| ## 69 | 3-Hydroxybutyric acid, 2TMS; 1 | 0.020800  | -0.459 | 0.5000 | 0.9320 | 0.997 |
| ## 70 | 4-Deoxytetronic acid; 32       | -0.014700 | -0.494 | 0.4650 | 0.9520 | 0.997 |
| ## 71 | Arabinopyranose; 51            | -0.010700 | -0.490 | 0.4690 | 0.9650 | 0.997 |
| ## 72 | Pyroglutamic acid; 69          | 0.009160  | -0.470 | 0.4890 | 0.9700 | 0.997 |
| ## 73 | Glycerol; 57                   | -0.006500 | -0.486 | 0.4730 | 0.9790 | 0.997 |
| ## 74 | Dodecanoic acid; 54            | 0.005040  | -0.474 | 0.4850 | 0.9840 | 0.997 |
| ## 75 | 3-Indolepropionic acid; 41     | -0.000676 | -0.480 | 0.4790 | 0.9980 | 0.998 |

### 6.1.3 Adjusted Model with eGFR

```
## [1] "Fitting models:"  
## [1] "~ Ulcer.diagnosis.at.DATE + Age.x + Gender.x + Hba1c_baseline + CALSBP + bmi + Smoking + Statin  
## [1] ""
```

### 6.1.3.1 Forest Plot of Model Coefficients

```
## Warning: Ignoring unknown aesthetics: x
## NULL
```

### 6.1.3.2 Tables of Model Coefficients

```

## [1] ""
## [1] "Table: Ulcer.diagnosis.at.DATEJA"
## [1] " (from model: "
## [1] " ~ Ulcer.diagnosis.at.DATE + Age.x + Gender.x +"
## [1] "      Hba1c_baseline + CALSBP + bmi + Smoking + Statin +"
## [1] "      log_Blood_TGA + Total_cholesterol + egfr)"
## [1] ""
## [1] "No significant associations at p.adj < 0.2"
## [1] ""
## [1] "Table: Age.x"
## [1] " (from model: "
## [1] " ~ Ulcer.diagnosis.at.DATE + Age.x + Gender.x +"
## [1] "      Hba1c_baseline + CALSBP + bmi + Smoking + Statin +"
## [1] "      log_Blood_TGA + Total_cholesterol + egfr)"
## [1] ""
##
##              Name Coefficient      CI.L      CI.R  p.value
## 1      Eicosapentaenoic acid; 55    0.02460  1.78e-02 0.031400 2.11e-12
## 2      Docosahexaenoic acid; 53    0.01540  8.55e-03 0.022200 1.07e-05
## 3              Glyceric acid; 30    0.01220  5.34e-03 0.019000 4.85e-04
## 4      alpha-Tocopherol; 26        0.01170  4.91e-03 0.018600 7.66e-04
## 5              Pyruvic acid; 31     0.01150  4.57e-03 0.018400 1.15e-03
## 6              Decanoic acid; 52    0.01140  4.52e-03 0.018300 1.18e-03
## 7  alpha-ketoglutaric acid, TMS M  0.01120  4.26e-03 0.018100 1.58e-03
## 8  4-Hydroxybenzeneacetic acid; 4   0.01030  3.56e-03 0.017100 2.81e-03
## 9              Aminomalonic acid; 45 0.01030  3.46e-03 0.017200 3.24e-03
## 10             3-Indoleacetic acid; 40 0.00999  3.11e-03 0.016900 4.43e-03
## 11 2,4-Dihydroxybutanoic acid; 28   0.00902  2.33e-03 0.015700 8.28e-03
## 12              Ribitol; 70         0.00928  2.36e-03 0.016200 8.59e-03
## 13              Tyrosine; 75        0.00859  1.66e-03 0.015500 1.52e-02
## 14             Palmitic acid, TMS; 5   0.00828  1.40e-03 0.015200 1.84e-02
## 15             Succinic acid, 2TMS; 7   0.00820  1.25e-03 0.015100 2.07e-02
## 16             Malic acid, 3TMS; 11    0.00811  1.18e-03 0.015000 2.18e-02
## 17             11-Eicosenoic acid; 35  0.00812  1.17e-03 0.015100 2.20e-02
## 18             Myristoleic acid; 65    0.00793  1.05e-03 0.014800 2.38e-02
## 19             Fumaric acid, 2TMS; 9   0.00760  6.75e-04 0.014500 3.15e-02
## 20             Heptadecanoic acid; 61  0.00761  6.72e-04 0.014500 3.16e-02
## 21             Glutamic acid, 3TMS; 8  0.00747  6.41e-04 0.014300 3.20e-02
## 22             Dodecanoic acid; 54    0.00747  5.82e-04 0.014400 3.36e-02
## 23              Glycerol; 57         0.00739  4.26e-04 0.014300 3.75e-02
## 24             Oleic acid, TMS; 3      0.00721  2.96e-04 0.014100 4.10e-02
## 25             Alanine, 2TMS; 25      0.00717  2.47e-04 0.014100 4.24e-02
## 26             L-5-Oxoproline; 63     0.00715  2.22e-04 0.014100 4.31e-02
## 27             Tartronic acid; 73     0.00706  1.96e-04 0.013900 4.38e-02
## 28 4-Hydroxyphenyllactic acid; 44    0.00688 -2.07e-05 0.013800 5.07e-02
## 29             Octanoic acid; 68     0.00687 -4.75e-05 0.013800 5.16e-02
## 30             Hydroxylamine; 62     -0.00679 -1.37e-02 0.000160 5.55e-02
## 31             Glycine, 3TMS; 17      0.00670 -1.68e-04 0.013600 5.59e-02
## 32             2-Palmitoylglycerol; 39  0.00657 -3.80e-04 0.013500 6.39e-02
## 33             Hydroxyproline; 64     -0.00630 -1.32e-02 0.000618 7.42e-02
## 34             Phenylalanine, 2TMS; 13 0.00633 -6.27e-04 0.013300 7.45e-02
## 35             Nonadecanoic acid; 66  0.00631 -6.37e-04 0.013300 7.50e-02
## 36             Citric acid, 4TMS; 6   0.00614 -6.88e-04 0.013000 7.79e-02

```

```

## 37          Stearic acid, TMS; 2      0.00615 -7.59e-04 0.013100 8.10e-02
## 38          Heptadecanoic acid; 60    0.00610 -8.32e-04 0.013000 8.45e-02
## 39          Methionine, 2TMS; 16     0.00598 -9.07e-04 0.012900 8.87e-02
## 40          Myo inositol 6TMS; 1     0.00572 -9.46e-04 0.012400 9.26e-02
##          p.adj
## 1  1.58e-10
## 2  4.03e-04
## 3  1.21e-02
## 4  1.44e-02
## 5  1.48e-02
## 6  1.48e-02
## 7  1.69e-02
## 8  2.63e-02
## 9  2.70e-02
## 10 3.33e-02
## 11 5.37e-02
## 12 5.37e-02
## 13 8.76e-02
## 14 9.69e-02
## 15 9.69e-02
## 16 9.69e-02
## 17 9.69e-02
## 18 9.93e-02
## 19 1.14e-01
## 20 1.14e-01
## 21 1.14e-01
## 22 1.14e-01
## 23 1.22e-01
## 24 1.22e-01
## 25 1.22e-01
## 26 1.22e-01
## 27 1.22e-01
## 28 1.33e-01
## 29 1.33e-01
## 30 1.35e-01
## 31 1.35e-01
## 32 1.50e-01
## 33 1.61e-01
## 34 1.61e-01
## 35 1.61e-01
## 36 1.62e-01
## 37 1.64e-01
## 38 1.67e-01
## 39 1.71e-01
## 40 1.74e-01
## [1] ""
## [1] "Table: Gender.x"
## [1] " (from model: "
## [1] " ~ Ulcer.diagnosis.at.DATE + Age.x + Gender.x +"
## [1] "      Hba1c_baseline + CALSBP + bmi + Smoking + Statin +"
## [1] "      log_Blood_TGA + Total_cholesterol + egfr)"
## [1] ""
##          Name Coefficient      CI.L      CI.R p.value      p.adj
## 1  4-Deoxytetric acid; 33      0.435  0.2780  0.59300 7.07e-08 5.30e-06

```

|       |                               |        |         |          |          |          |
|-------|-------------------------------|--------|---------|----------|----------|----------|
| ## 2  | Myristoleic acid; 65          | -0.379 | -0.5380 | -0.22000 | 3.25e-06 | 8.88e-05 |
| ## 3  | Glyceric acid; 30             | -0.375 | -0.5330 | -0.21700 | 3.55e-06 | 8.88e-05 |
| ## 4  | Proline, 2TMS; 21             | 0.363  | 0.2040  | 0.52300  | 7.87e-06 | 1.48e-04 |
| ## 5  | Tartronic acid; 73            | -0.350 | -0.5080 | -0.19100 | 1.65e-05 | 2.47e-04 |
| ## 6  | Dodecanoic acid; 54           | -0.340 | -0.4990 | -0.18100 | 2.98e-05 | 3.72e-04 |
| ## 7  | Cholesterol, TMS; 23          | -0.315 | -0.4700 | -0.16000 | 6.97e-05 | 7.47e-04 |
| ## 8  | Oleic acid, TMS; 3            | -0.318 | -0.4780 | -0.15800 | 9.75e-05 | 9.14e-04 |
| ## 9  | Methionine, 2TMS; 16          | 0.314  | 0.1550  | 0.47300  | 1.14e-04 | 9.48e-04 |
| ## 10 | Citric acid, 4TMS; 6          | -0.302 | -0.4600 | -0.14400 | 1.78e-04 | 1.34e-03 |
| ## 11 | Docosahexaenoic acid; 53      | -0.291 | -0.4490 | -0.13300 | 3.21e-04 | 2.09e-03 |
| ## 12 | Glycine, 3TMS; 17             | -0.291 | -0.4500 | -0.13200 | 3.35e-04 | 2.09e-03 |
| ## 13 | Leucine, 2TMS; 19             | 0.282  | 0.1230  | 0.44100  | 5.00e-04 | 2.88e-03 |
| ## 14 | Valine, 2TMS; 20              | 0.277  | 0.1200  | 0.43400  | 5.55e-04 | 2.98e-03 |
| ## 15 | Decanoic acid; 52             | -0.277 | -0.4360 | -0.11800 | 6.60e-04 | 3.30e-03 |
| ## 16 | Aminomalonic acid; 45         | -0.272 | -0.4310 | -0.11200 | 8.34e-04 | 3.91e-03 |
| ## 17 | Stearic acid, TMS; 2          | -0.267 | -0.4270 | -0.10700 | 1.08e-03 | 4.78e-03 |
| ## 18 | Tridecanoic acid; 74          | -0.261 | -0.4210 | -0.10100 | 1.43e-03 | 5.67e-03 |
| ## 19 | Palmitic acid, TMS; 5         | -0.258 | -0.4180 | -0.09920 | 1.48e-03 | 5.67e-03 |
| ## 20 | Hydroxyproline; 64            | 0.259  | 0.0992  | 0.41900  | 1.51e-03 | 5.67e-03 |
| ## 21 | Heptadecanoic acid; 61        | -0.256 | -0.4160 | -0.09540 | 1.79e-03 | 6.38e-03 |
| ## 22 | Heptadecanoic acid; 60        | -0.254 | -0.4150 | -0.09390 | 1.90e-03 | 6.49e-03 |
| ## 23 | Glutamic acid, 3TMS; 8        | 0.241  | 0.0831  | 0.39900  | 2.79e-03 | 9.10e-03 |
| ## 24 | Isoleucine, 2TMS; 18          | 0.238  | 0.0804  | 0.39500  | 3.09e-03 | 9.66e-03 |
| ## 25 | 2-hydroxy Isovaleric acid; 38 | 0.236  | 0.0763  | 0.39700  | 3.82e-03 | 1.15e-02 |
| ## 26 | Nonadecanoic acid; 66         | -0.232 | -0.3920 | -0.07110 | 4.70e-03 | 1.36e-02 |
| ## 27 | Tyrosine; 75                  | -0.228 | -0.3880 | -0.06730 | 5.39e-03 | 1.50e-02 |
| ## 28 | Succinic acid, 2TMS; 7        | -0.223 | -0.3840 | -0.06250 | 6.49e-03 | 1.74e-02 |
| ## 29 | Glycerol; 57                  | -0.183 | -0.3440 | -0.02190 | 2.60e-02 | 6.72e-02 |
| ## 30 | 1-Monopalmitin; 37            | 0.174  | 0.0124  | 0.33500  | 3.48e-02 | 8.70e-02 |
| ## 31 | 11-Eicosenoic acid; 35        | -0.164 | -0.3240 | -0.00299 | 4.59e-02 | 1.11e-01 |
| ## 32 | Nonanoic acid; 67             | -0.159 | -0.3200 | 0.00199  | 5.29e-02 | 1.24e-01 |
| ## 33 | Arachidonic acid, TMS; 24     | -0.156 | -0.3160 | 0.00513  | 5.78e-02 | 1.31e-01 |
| ## 34 | Benzeneacetic acid; 47        | -0.151 | -0.3110 | 0.00832  | 6.32e-02 | 1.39e-01 |

```
## [1] ""
## [1] "Table: Hba1c_baseline"
## [1] " (from model: "
## [1] " ~ Ulcer.diagnosis.at.DATE + Age.x + Gender.x +"
## [1] " Hba1c_baseline + CALSBP + bmi + Smoking + Statin +"
## [1] " log_Blood_TGA + Total_cholesterol + egfr)"
## [1] ""
```

| ##    | Name                       | Coefficient | CI.L     | CI.R    | p.value  | p.adj  |
|-------|----------------------------|-------------|----------|---------|----------|--------|
| ## 1  | Eicosapentaenoic acid; 55  | -0.1310     | -0.20100 | -0.0615 | 0.000235 | 0.0117 |
| ## 2  | Tridecanoic acid; 74       | -0.1310     | -0.20200 | -0.0599 | 0.000312 | 0.0117 |
| ## 3  | Arabinopyranose; 51        | 0.1250      | 0.05350  | 0.1960  | 0.000595 | 0.0149 |
| ## 4  | Docosahexaenoic acid; 53   | -0.1200     | -0.19000 | -0.0497 | 0.000821 | 0.0154 |
| ## 5  | Alanine, 2TMS; 25          | 0.1150      | 0.04420  | 0.1860  | 0.001490 | 0.0188 |
| ## 6  | Glyceric acid; 30          | -0.1140     | -0.18400 | -0.0435 | 0.001510 | 0.0188 |
| ## 7  | Ethanolamine; 56           | 0.1120      | 0.04040  | 0.1830  | 0.002170 | 0.0232 |
| ## 8  | Valine, 2TMS; 20           | 0.1020      | 0.03200  | 0.1710  | 0.004280 | 0.0401 |
| ## 9  | Decanoic acid; 52          | -0.0952     | -0.16600 | -0.0246 | 0.008290 | 0.0691 |
| ## 10 | 4-Hydroxybutanoic acid; 43 | -0.0860     | -0.15700 | -0.0147 | 0.018100 | 0.1340 |
| ## 11 | Citric acid, 4TMS; 6       | 0.0835      | 0.01340  | 0.1540  | 0.019600 | 0.1340 |
| ## 12 | 11-Eicosenoic acid; 35     | -0.0823     | -0.15400 | -0.0110 | 0.023600 | 0.1480 |
| ## 13 | Lactic acid; 29            | 0.0787      | 0.00766  | 0.1500  | 0.029900 | 0.1720 |

```

## 14      Myristoleic acid; 65      -0.0772 -0.14800 -0.0066 0.032100 0.1720
## 15      Glyceryl-glycoside; 59      0.0750  0.00421  0.1460 0.037900 0.1890
## [1] ""
## [1] "Table: CALSBP"
## [1] " (from model: "
## [1] " ~ Ulcer.diagnosis.at.DATE + Age.x + Gender.x +"
## [1] "      Hba1c_baseline + CALSBP + bmi + Smoking + Statin +"
## [1] "      log_Blood_TGA + Total_cholesterol + egfr)"
## [1] ""
##
##              Name Coefficient      CI.L      CI.R p.value  p.adj
## 1 Myristoleic acid; 65      0.00823 0.00361 0.0129 0.00049 0.0368
## [1] ""
## [1] "Table: bmi"
## [1] " (from model: "
## [1] " ~ Ulcer.diagnosis.at.DATE + Age.x + Gender.x +"
## [1] "      Hba1c_baseline + CALSBP + bmi + Smoking + Statin +"
## [1] "      log_Blood_TGA + Total_cholesterol + egfr)"
## [1] ""
##
##              Name Coefficient      CI.L      CI.R p.value
## 1      Glutamic acid, 3TMS; 8      0.0456 0.025300 0.065800 1.06e-05
## 2      Campesterol; 49      -0.0393 -0.059600 -0.019100 1.45e-04
## 3 2-Hydroxybutyric acid, 2TMS; 2      0.0392 0.019000 0.059400 1.48e-04
## 4      Lactic acid; 29      0.0301 0.009600 0.050700 4.04e-03
## 5      Pyruvic acid; 31      -0.0300 -0.050500 -0.009430 4.26e-03
## 6      Decanoic acid; 52      -0.0292 -0.049600 -0.008770 5.11e-03
## 7      Arachidic acid; 46      -0.0285 -0.049000 -0.007890 6.71e-03
## 8      1,3-Propanediol; 34      -0.0284 -0.049000 -0.007770 6.99e-03
## 9      alpha-Tocopherol; 26      -0.0270 -0.047200 -0.006740 9.01e-03
## 10 2,4-Dihydroxybutanoic acid; 28      -0.0264 -0.046200 -0.006560 9.12e-03
## 11      Pyroglutamic acid; 69      -0.0252 -0.045600 -0.004740 1.58e-02
## 12      Citric acid, 4TMS; 6      -0.0244 -0.044700 -0.004170 1.81e-02
## 13      Tartronic acid; 73      -0.0218 -0.042200 -0.001480 3.56e-02
## 14      Ribitol; 70      0.0219 0.001410 0.042400 3.62e-02
## 15      Isoleucine, 2TMS; 18      0.0213 0.001130 0.041500 3.85e-02
## 16 alpha-ketoglutaric acid, TMS M      -0.0214 -0.042000 -0.000853 4.12e-02
## 17      11-Eicosenoic acid; 35      0.0214 0.000851 0.042000 4.13e-02
##
##      p.adj
## 1 0.000791
## 2 0.003690
## 3 0.003690
## 4 0.063800
## 5 0.063800
## 6 0.063800
## 7 0.065500
## 8 0.065500
## 9 0.068400
## 10 0.068400
## 11 0.108000
## 12 0.113000
## 13 0.182000
## 14 0.182000
## 15 0.182000
## 16 0.182000
## 17 0.182000

```



```

## [1] ""
## [1] "Table: Smoking"
## [1] " (from model: "
## [1] " ~ Ulcer.diagnosis.at.DATE + Age.x + Gender.x +"
## [1] "      Hba1c_baseline + CALSBP + bmi + Smoking + Statin +"
## [1] "      log_Blood_TGA + Total_cholesterol + egfr)"
## [1] ""
##
##          Name Coefficient      CI.L      CI.R  p.value  p.adj
## 1  Docosahexaenoic acid; 53   -0.382 -0.5720 -0.19200 8.46e-05 0.00349
## 2    Glutamic acid, 3TMS; 8    0.375  0.1850  0.56400 1.11e-04 0.00349
## 3  3-Indolepropionic acid; 41  -0.374 -0.5660 -0.18200 1.39e-04 0.00349
## 4      Tartronic acid; 73     -0.349 -0.5390 -0.15800 3.45e-04 0.00622
## 5    Glyceric acid; 30       -0.342 -0.5320 -0.15200 4.15e-04 0.00622
## 6      Valine, 2TMS; 20      -0.311 -0.5000 -0.12200 1.26e-03 0.01580
## 7  alpha-Tocopherol; 26      -0.304 -0.4940 -0.11400 1.71e-03 0.01830
## 8    Citric acid, 4TMS; 6     -0.264 -0.4530 -0.07390 6.50e-03 0.05600
## 9    Campesterol; 49         -0.260 -0.4500 -0.07030 7.25e-03 0.05600
## 10 Benzeneacetic acid; 47     -0.262 -0.4540 -0.07010 7.47e-03 0.05600
## 11    Malic acid, 3TMS; 11    -0.245 -0.4380 -0.05270 1.26e-02 0.08560
## 12    Leucine, 2TMS; 19     -0.240 -0.4300 -0.04890 1.38e-02 0.08630
## 13 3,4-Dihydroxybutanoic acid; 27  0.223  0.0350  0.41000 2.01e-02 0.11600
## 14      Ribitol; 70          0.217  0.0252  0.40900 2.67e-02 0.14300
## 15  Heptadecanoic acid; 60    -0.203 -0.3950 -0.01010 3.91e-02 0.18400
## 16  Heptadecanoic acid; 61    -0.202 -0.3940 -0.00890 4.03e-02 0.18400
## 17      Ribonic acid; 72     -0.193 -0.3800 -0.00702 4.20e-02 0.18400
## 18  3-Indoleacetic acid; 40   -0.196 -0.3870 -0.00486 4.45e-02 0.18400
## 19 4-Hydroxyphenyllactic acid; 44  -0.195 -0.3860 -0.00295 4.66e-02 0.18400
## 20    Isoleucine, 2TMS; 18   -0.187 -0.3760  0.00224 5.28e-02 0.19800
## [1] ""
## [1] "Table: Statin"
## [1] " (from model: "
## [1] " ~ Ulcer.diagnosis.at.DATE + Age.x + Gender.x +"
## [1] "      Hba1c_baseline + CALSBP + bmi + Smoking + Statin +"
## [1] "      log_Blood_TGA + Total_cholesterol + egfr)"
## [1] ""
##
##          Name Coefficient      CI.L      CI.R  p.value  p.adj
## 1 L-5-Oxoproline; 63         -0.302 -0.478 -0.126 0.000761 0.057
## [1] ""
## [1] "Table: log_Blood_TGA"
## [1] " (from model: "
## [1] " ~ Ulcer.diagnosis.at.DATE + Age.x + Gender.x +"
## [1] "      Hba1c_baseline + CALSBP + bmi + Smoking + Statin +"
## [1] "      log_Blood_TGA + Total_cholesterol + egfr)"
## [1] ""
##
##          Name Coefficient      CI.L      CI.R  p.value
## 1  Palmitic acid, TMS; 5     0.293  0.164000  4.21e-01 8.18e-06
## 2   Dodecanoic acid; 54     0.280  0.151000  4.08e-01 2.01e-05
## 3   Stearic acid, TMS; 2    0.278  0.149000  4.07e-01 2.41e-05
## 4    Octanoic acid; 68     0.264  0.135000  3.93e-01 6.33e-05
## 5    Decanoic acid; 52     0.262  0.134000  3.90e-01 6.42e-05
## 6   Arachidic acid; 46     0.250  0.121000  3.80e-01 1.51e-04
## 7 2-Hydroxybutyric acid, 2TMS; 2  0.226  0.099400  3.53e-01 4.81e-04
## 8    Oleic acid, TMS; 3     0.216  0.087000  3.45e-01 1.03e-03
## 9    Isoleucine, 2TMS; 18   0.202  0.075200  3.29e-01 1.82e-03

```

|       |                                |        |           |           |          |
|-------|--------------------------------|--------|-----------|-----------|----------|
| ## 10 | Valine, 2TMS; 20               | 0.198  | 0.071700  | 3.25e-01  | 2.16e-03 |
| ## 11 | Arabinopyranose; 51            | 0.192  | 0.062800  | 3.21e-01  | 3.58e-03 |
| ## 12 | Glyceryl-glycoside; 59         | 0.186  | 0.057500  | 3.14e-01  | 4.58e-03 |
| ## 13 | Heptadecanoic acid; 60         | 0.181  | 0.052000  | 3.11e-01  | 6.00e-03 |
| ## 14 | Lactic acid; 29                | 0.178  | 0.048900  | 3.07e-01  | 6.89e-03 |
| ## 15 | Heptadecanoic acid; 61         | 0.171  | 0.041800  | 3.00e-01  | 9.51e-03 |
| ## 16 | Glutamic acid, 3TMS; 8         | 0.168  | 0.040600  | 2.95e-01  | 9.76e-03 |
| ## 17 | Leucine, 2TMS; 19              | 0.167  | 0.039100  | 2.95e-01  | 1.05e-02 |
| ## 18 | Aminomalonic acid; 45          | -0.167 | -0.296000 | -3.91e-02 | 1.06e-02 |
| ## 19 | 3,4-Dihydroxybutanoic acid; 27 | 0.163  | 0.037400  | 2.89e-01  | 1.10e-02 |
| ## 20 | Pyruvic acid; 31               | 0.166  | 0.036500  | 2.95e-01  | 1.20e-02 |
| ## 21 | Myristoleic acid; 65           | 0.164  | 0.035700  | 2.92e-01  | 1.23e-02 |
| ## 22 | 4-Hydroxybenzeneacetic acid; 4 | 0.156  | 0.030200  | 2.83e-01  | 1.52e-02 |
| ## 23 | 4-Hydroxybutanoic acid; 43     | 0.157  | 0.027200  | 2.86e-01  | 1.78e-02 |
| ## 24 | alpha-ketoglutaric acid, TMS M | 0.154  | 0.024700  | 2.83e-01  | 1.96e-02 |
| ## 25 | Ribonic acid; 72               | 0.148  | 0.022500  | 2.73e-01  | 2.08e-02 |
| ## 26 | Fumaric acid, 2TMS; 9          | 0.139  | 0.010400  | 2.69e-01  | 3.43e-02 |
| ## 27 | Arachidonic acid, TMS; 24      | 0.139  | 0.009900  | 2.69e-01  | 3.49e-02 |
| ## 28 | Proline, 2TMS; 21              | 0.134  | 0.005670  | 2.62e-01  | 4.07e-02 |
| ## 29 | Malic acid, 3TMS; 11           | 0.131  | 0.001750  | 2.60e-01  | 4.70e-02 |
| ## 30 | 3-Indolepropionic acid; 41     | -0.129 | -0.258000 | -6.46e-05 | 4.99e-02 |
| ## 31 | Succinic acid, 2TMS; 7         | 0.129  | -0.000522 | 2.58e-01  | 5.09e-02 |
| ## 32 | Nonadecanoic acid; 66          | 0.125  | -0.003940 | 2.55e-01  | 5.74e-02 |
| ## 33 | Ribitol; 71                    | 0.120  | -0.004490 | 2.45e-01  | 5.88e-02 |
| ## 34 | Tartronic acid; 73             | -0.123 | -0.251000 | 5.21e-03  | 6.01e-02 |
| ## 35 | Glycine, 3TMS; 17              | -0.122 | -0.250000 | 6.12e-03  | 6.20e-02 |
| ## 36 | Glyceric acid; 30              | -0.120 | -0.248000 | 6.94e-03  | 6.38e-02 |
| ## 37 | 1,3-Propanediol; 34            | 0.118  | -0.012100 | 2.47e-01  | 7.54e-02 |
| ## 38 | Tridecanoic acid; 74           | 0.115  | -0.014100 | 2.44e-01  | 8.07e-02 |
| ## 39 | 3-Hydroxybutyric acid, 2TMS; 1 | 0.114  | -0.015600 | 2.44e-01  | 8.47e-02 |
| ##    | p.adj                          |        |           |           |          |
| ## 1  | 0.000603                       |        |           |           |          |
| ## 2  | 0.000603                       |        |           |           |          |
| ## 3  | 0.000603                       |        |           |           |          |
| ## 4  | 0.000963                       |        |           |           |          |
| ## 5  | 0.000963                       |        |           |           |          |
| ## 6  | 0.001890                       |        |           |           |          |
| ## 7  | 0.005150                       |        |           |           |          |
| ## 8  | 0.009660                       |        |           |           |          |
| ## 9  | 0.015200                       |        |           |           |          |
| ## 10 | 0.016200                       |        |           |           |          |
| ## 11 | 0.024400                       |        |           |           |          |
| ## 12 | 0.028600                       |        |           |           |          |
| ## 13 | 0.034600                       |        |           |           |          |
| ## 14 | 0.036900                       |        |           |           |          |
| ## 15 | 0.043600                       |        |           |           |          |
| ## 16 | 0.043600                       |        |           |           |          |
| ## 17 | 0.043600                       |        |           |           |          |
| ## 18 | 0.043600                       |        |           |           |          |
| ## 19 | 0.043600                       |        |           |           |          |
| ## 20 | 0.043800                       |        |           |           |          |
| ## 21 | 0.043800                       |        |           |           |          |
| ## 22 | 0.051700                       |        |           |           |          |
| ## 23 | 0.057900                       |        |           |           |          |

```

## 24 0.061300
## 25 0.062300
## 26 0.096900
## 27 0.096900
## 28 0.109000
## 29 0.121000
## 30 0.123000
## 31 0.123000
## 32 0.133000
## 33 0.133000
## 34 0.133000
## 35 0.133000
## 36 0.133000
## 37 0.153000
## 38 0.159000
## 39 0.163000
## [1] ""
## [1] "Table: Total_cholesterol"
## [1] " (from model: "
## [1] " ~ Ulcer.diagnosis.at.DATE + Age.x + Gender.x +"
## [1] "      Hba1c_baseline + CALSBP + bmi + Smoking + Statin +"
## [1] "      log_Blood_TGA + Total_cholesterol + egfr)"
## [1] ""
##
##              Name Coefficient    CI.L    CI.R  p.value
## 1      Cholesterol, TMS; 23      0.4550  0.3620  0.54800 2.75e-21
## 2      Campesterol; 49          0.3710  0.2760  0.46600 2.81e-14
## 3      alpha-Tocopherol; 26      0.3240  0.2290  0.41800 2.81e-11
## 4      Benzeneacetic acid; 47     -0.1810 -0.2770 -0.08560 2.11e-04
## 5      Linoleic acid, TMS; 4       0.1790  0.0833  0.27500 2.55e-04
## 6      4-Hydroxybutanoic acid; 43 -0.1770 -0.2730 -0.08030 3.33e-04
## 7      Proline, 2TMS; 21          -0.1710 -0.2660 -0.07540 4.58e-04
## 8      Isoleucine, 2TMS; 18       -0.1670 -0.2610 -0.07230 5.51e-04
## 9      L-5-Oxoproline; 63         -0.1660 -0.2630 -0.07020 7.07e-04
## 10     Glycine, 3TMS; 17          -0.1590 -0.2550 -0.06400 1.06e-03
## 11     Tyrosine; 75              -0.1580 -0.2540 -0.06150 1.33e-03
## 12     Methionine, 2TMS; 16        -0.1500 -0.2450 -0.05410 2.16e-03
## 13     2,4-Dihydroxybutanoic acid; 28 -0.1400 -0.2330 -0.04740 3.10e-03
## 14     Arabinopyranose; 51         -0.1440 -0.2400 -0.04760 3.39e-03
## 15     Docosahexaenoic acid; 53     0.1390  0.0444  0.23400 4.04e-03
## 16     Eicosapentaenoic acid; 55    0.1360  0.0415  0.23100 4.81e-03
## 17     Threonine, 3TMS; 12         -0.1380 -0.2340 -0.04110 5.22e-03
## 18     4-Hydroxybenzeneacetic acid; 4 -0.1310 -0.2250 -0.03740 6.19e-03
## 19     Alanine, 2TMS; 25           -0.1330 -0.2290 -0.03690 6.71e-03
## 20     2-Palmitoylglycerol; 39      0.1330  0.0369  0.23000 6.76e-03
## 21     Glyceryl-glycoside; 59       -0.1270 -0.2230 -0.03150 9.23e-03
## 22     Hydroxylamine; 62           -0.1250 -0.2210 -0.02820 1.13e-02
## 23     Serine, 3TMS; 14            -0.1210 -0.2170 -0.02500 1.35e-02
## 24     Ribitol; 71                -0.1150 -0.2080 -0.02240 1.50e-02
## 25     3-Indoleacetic acid; 40      -0.1140 -0.2100 -0.01900 1.88e-02
## 26     Ribonic acid; 72            -0.1010 -0.1940 -0.00745 3.43e-02
## 27     Phenylalanine, 2TMS; 13      -0.1040 -0.2010 -0.00770 3.43e-02
## 28     Pyruvic acid; 31            -0.1020 -0.1990 -0.00629 3.68e-02
## 29     Malic acid, 3TMS; 11        -0.1010 -0.1970 -0.00500 3.92e-02
## 30     3,4-Dihydroxybutanoic acid; 27 -0.0908 -0.1850  0.00293 5.76e-02

```

```

## 31          Leucine, 2TMS; 19      -0.0912 -0.1860  0.00409 6.07e-02
## 32          Ethanolamine; 56      -0.0893 -0.1860  0.00718 6.96e-02
## 33          Valine, 2TMS; 20      -0.0867 -0.1810  0.00763 7.16e-02
## 34          1,3-Propanediol; 34    -0.0852 -0.1820  0.01150 8.40e-02
## 35          Palmitic acid, TMS; 5   0.0840 -0.0115  0.18000 8.48e-02
## 36          3-Indolepropionic acid; 41 0.0828 -0.0131  0.17900 9.06e-02
##          p.adj
## 1  2.06e-19
## 2  1.05e-12
## 3  7.02e-10
## 4  3.83e-03
## 5  3.83e-03
## 6  4.16e-03
## 7  4.91e-03
## 8  5.16e-03
## 9  5.89e-03
## 10 7.99e-03
## 11 9.06e-03
## 12 1.35e-02
## 13 1.79e-02
## 14 1.81e-02
## 15 2.02e-02
## 16 2.25e-02
## 17 2.30e-02
## 18 2.53e-02
## 19 2.53e-02
## 20 2.53e-02
## 21 3.30e-02
## 22 3.87e-02
## 23 4.40e-02
## 24 4.68e-02
## 25 5.64e-02
## 26 9.54e-02
## 27 9.54e-02
## 28 9.86e-02
## 29 1.01e-01
## 30 1.44e-01
## 31 1.47e-01
## 32 1.63e-01
## 33 1.63e-01
## 34 1.82e-01
## 35 1.82e-01
## 36 1.89e-01
## [1] ""
## [1] "Table: egfr"
## [1] " (from model: "
## [1] " ~ Ulcer.diagnosis.at.DATE + Age.x + Gender.x +"
## [1] "      Hba1c_baseline + CALSBP + bmi + Smoking + Statin +"
## [1] "      log_Blood_TGA + Total_cholesterol + egfr)"
## [1] ""
##
##              Name Coefficient      CI.L      CI.R p.value
## 1      Myo inositol 6TMS; 1  -0.01650 -0.019400 -1.36e-02 9.38e-28
## 2              Ribitol; 71  -0.01580 -0.018700 -1.29e-02 1.87e-25
## 3      Creatinine; 50      -0.01540 -0.018300 -1.24e-02 1.09e-23

```

|       |                                |          |           |           |          |
|-------|--------------------------------|----------|-----------|-----------|----------|
| ## 4  | 2,4-Dihydroxybutanoic acid; 28 | -0.01490 | -0.017800 | -1.19e-02 | 8.90e-23 |
| ## 5  | Ribonic acid; 72               | -0.01480 | -0.017800 | -1.19e-02 | 1.36e-22 |
| ## 6  | 3,4-Dihydroxybutanoic acid; 27 | -0.01320 | -0.016100 | -1.02e-02 | 4.21e-18 |
| ## 7  | 4-Hydroxybenzeneacetic acid; 4 | -0.01150 | -0.014400 | -8.51e-03 | 4.94e-14 |
| ## 8  | 4-Deoxytetronic acid; 33       | -0.01110 | -0.014100 | -8.13e-03 | 4.24e-13 |
| ## 9  | 4-Deoxytetronic acid; 32       | -0.01030 | -0.013400 | -7.33e-03 | 2.23e-11 |
| ## 10 | Isoleucine, 2TMS; 18           | 0.00947  | 0.006490  | 1.24e-02  | 5.60e-10 |
| ## 11 | 2-Hydroxybutyric acid, 2TMS; 2 | 0.00911  | 0.006130  | 1.21e-02  | 2.43e-09 |
| ## 12 | Valine, 2TMS; 20               | 0.00873  | 0.005760  | 1.17e-02  | 9.77e-09 |
| ## 13 | Citric acid, 4TMS; 6           | -0.00831 | -0.011300 | -5.33e-03 | 5.46e-08 |
| ## 14 | Pyroglutamic acid; 69          | -0.00817 | -0.011200 | -5.15e-03 | 1.24e-07 |
| ## 15 | Hydroxyproline; 64             | -0.00774 | -0.010800 | -4.72e-03 | 5.73e-07 |
| ## 16 | 3-Indoleacetic acid; 40        | -0.00709 | -0.010100 | -4.08e-03 | 4.00e-06 |
| ## 17 | Glyceryl-glycoside; 59         | -0.00696 | -0.009970 | -3.95e-03 | 6.32e-06 |
| ## 18 | 4-Hydroxyphenyllactic acid; 44 | -0.00641 | -0.009420 | -3.39e-03 | 3.30e-05 |
| ## 19 | Leucine, 2TMS; 19              | 0.00622  | 0.003220  | 9.22e-03  | 5.07e-05 |
| ## 20 | Serine, 3TMS; 14               | 0.00614  | 0.003120  | 9.16e-03  | 7.07e-05 |
| ## 21 | Octanoic acid; 68              | 0.00574  | 0.002710  | 8.77e-03  | 2.06e-04 |
| ## 22 | Methionine, 2TMS; 16           | 0.00566  | 0.002640  | 8.67e-03  | 2.37e-04 |
| ## 23 | Stearic acid, TMS; 2           | 0.00539  | 0.002360  | 8.41e-03  | 4.87e-04 |
| ## 24 | Tyrosine; 75                   | 0.00535  | 0.002320  | 8.38e-03  | 5.49e-04 |
| ## 25 | Glycine, 3TMS; 17              | -0.00507 | -0.008080 | -2.07e-03 | 9.48e-04 |
| ## 26 | Fumaric acid, 2TMS; 9          | -0.00501 | -0.008040 | -1.97e-03 | 1.22e-03 |
| ## 27 | Eicosapentaenoic acid; 55      | 0.00455  | 0.001570  | 7.53e-03  | 2.77e-03 |
| ## 28 | 2-hydroxy Isovaleric acid; 38  | 0.00458  | 0.001550  | 7.61e-03  | 3.06e-03 |
| ## 29 | Malic acid, 3TMS; 11           | -0.00421 | -0.007230 | -1.18e-03 | 6.54e-03 |
| ## 30 | Palmitic acid, TMS; 5          | 0.00407  | 0.001060  | 7.08e-03  | 8.10e-03 |
| ## 31 | Cholesterol, TMS; 23           | 0.00385  | 0.000918  | 6.78e-03  | 1.01e-02 |
| ## 32 | Benzeneacetic acid; 47         | -0.00384 | -0.006860 | -8.21e-04 | 1.27e-02 |
| ## 33 | Glycerol; 57                   | 0.00368  | 0.000637  | 6.73e-03  | 1.78e-02 |
| ## 34 | Docosahexaenoic acid; 53       | 0.00358  | 0.000589  | 6.57e-03  | 1.90e-02 |
| ## 35 | Alanine, 2TMS; 25              | -0.00353 | -0.006560 | -5.06e-04 | 2.22e-02 |
| ## 36 | Glyceric acid; 30              | 0.00347  | 0.000481  | 6.46e-03  | 2.29e-02 |
| ## 37 | Glycerol; 58                   | -0.00307 | -0.006130 | -2.35e-05 | 4.83e-02 |
| ##    | p.adj                          |          |           |           |          |
| ## 1  |                                | 7.03e-26 |           |           |          |
| ## 2  |                                | 7.02e-24 |           |           |          |
| ## 3  |                                | 2.73e-22 |           |           |          |
| ## 4  |                                | 1.67e-21 |           |           |          |
| ## 5  |                                | 2.03e-21 |           |           |          |
| ## 6  |                                | 5.27e-17 |           |           |          |
| ## 7  |                                | 5.29e-13 |           |           |          |
| ## 8  |                                | 3.97e-12 |           |           |          |
| ## 9  |                                | 1.85e-10 |           |           |          |
| ## 10 |                                | 4.20e-09 |           |           |          |
| ## 11 |                                | 1.65e-08 |           |           |          |
| ## 12 |                                | 6.11e-08 |           |           |          |
| ## 13 |                                | 3.15e-07 |           |           |          |
| ## 14 |                                | 6.62e-07 |           |           |          |
| ## 15 |                                | 2.87e-06 |           |           |          |
| ## 16 |                                | 1.88e-05 |           |           |          |
| ## 17 |                                | 2.79e-05 |           |           |          |
| ## 18 |                                | 1.37e-04 |           |           |          |
| ## 19 |                                | 2.00e-04 |           |           |          |

## 20 2.65e-04  
## 21 7.36e-04  
## 22 8.09e-04  
## 23 1.59e-03  
## 24 1.72e-03  
## 25 2.84e-03  
## 26 3.52e-03  
## 27 7.69e-03  
## 28 8.21e-03  
## 29 1.69e-02  
## 30 2.02e-02  
## 31 2.44e-02  
## 32 2.98e-02  
## 33 4.05e-02  
## 34 4.19e-02  
## 35 4.75e-02  
## 36 4.77e-02  
## 37 9.78e-02

### 6.1.3.3 Table with All Metabolites

```
## [1] ""
## [1] "Table: Ulcer.diagnosis.at.DATEJA"
## [1] " (from model: "
## [1] " ~ Ulcer.diagnosis.at.DATE + Age.x + Gender.x +"
## [1] "      Hba1c_baseline + CALSBP + bmi + Smoking + Statin +"
## [1] "      log_Blood_TGA + Total_cholesterol + egfr)"
## [1] ""
##
##              Name Coefficient  CI.L  CI.R p.value p.adj
## 1      Citric acid, 4TMS; 6   -0.62200 -1.090 -0.151 0.00962 0.722
## 2 2-Hydroxybutyric acid, 2TMS; 2  -0.36400 -0.833  0.106 0.12900 0.927
## 3      Tyrosine; 75           0.36700 -0.110  0.844 0.13200 0.927
## 4      Benzeneacetic acid; 47    -0.36300 -0.839  0.112 0.13400 0.927
## 5      4-Deoxytetrionic acid; 33  -0.33900 -0.809  0.131 0.15800 0.927
## 6 2-hydroxy Isovaleric acid; 38  -0.32800 -0.805  0.149 0.17700 0.927
## 7      Cholesterol, TMS; 23     -0.31600 -0.778  0.145 0.17900 0.927
## 8      Glyceryl-glycoside; 59    -0.31500 -0.789  0.160 0.19300 0.927
## 9      Palmitic acid, TMS; 5     0.31000 -0.164  0.784 0.20000 0.927
## 10 4-Hydroxybenzeneacetic acid; 4 -0.29900 -0.765  0.168 0.20900 0.927
## 11      Nonanoic acid; 67        0.29800 -0.181  0.777 0.22300 0.927
## 12      Glycerol; 58            0.29400 -0.186  0.774 0.23000 0.927
## 13      Serine, 3TMS; 14        -0.28800 -0.764  0.188 0.23500 0.927
## 14      L-5-Oxoproline; 63      -0.28400 -0.761  0.193 0.24300 0.927
## 15      Nonadecanoic acid; 66    0.28100 -0.197  0.759 0.24900 0.927
## 16      Myristoleic acid; 65     0.26700 -0.207  0.741 0.26900 0.927
## 17      Methionine, 2TMS; 16     0.26400 -0.210  0.738 0.27500 0.927
## 18 2,4-Dihydroxybutanoic acid; 28 -0.25100 -0.712  0.209 0.28500 0.927
## 19      Stearic acid, TMS; 2     0.25700 -0.219  0.733 0.29000 0.927
## 20      Heptadecanoic acid; 61    0.25400 -0.223  0.732 0.29700 0.927
## 21      Ribitol; 71            0.23800 -0.223  0.698 0.31200 0.927
## 22      alpha-Tocopherol; 26     -0.23400 -0.704  0.236 0.32900 0.927
## 23      Aminomalonic acid; 45    -0.21800 -0.692  0.256 0.36700 0.927
## 24      Fumaric acid, 2TMS; 9    -0.20900 -0.686  0.268 0.39100 0.927
## 25      Ribitol; 70            -0.20800 -0.684  0.268 0.39200 0.927
## 26      Malic acid, 3TMS; 11     0.20600 -0.271  0.683 0.39700 0.927
## 27      1,3-Propanediol; 34      0.19900 -0.280  0.679 0.41500 0.927
## 28      3-Indoleacetic acid; 40  -0.19300 -0.666  0.281 0.42400 0.927
## 29      Tridecanoic acid; 74     0.19000 -0.287  0.668 0.43500 0.927
## 30 3,4-Dihydroxybutanoic acid; 27 -0.17700 -0.642  0.288 0.45600 0.927
## 31      Campesterol; 49         -0.17700 -0.648  0.293 0.46000 0.927
## 32      Glyceric acid; 30        -0.16900 -0.640  0.301 0.48000 0.927
## 33      1-Monopalmitin; 37       -0.17200 -0.652  0.307 0.48100 0.927
## 34      Glutamic acid, 3TMS; 8   -0.16700 -0.637  0.303 0.48700 0.927
## 35      Ethanolamine; 56        0.16200 -0.317  0.641 0.50600 0.927
## 36 alpha-ketoglutaric acid, TMS M  0.15500 -0.323  0.633 0.52400 0.927
## 37      Docosahexaenoic acid; 53 -0.14700 -0.618  0.323 0.53900 0.927
## 38      Proline, 2TMS; 21       0.14400 -0.329  0.618 0.55000 0.927
## 39      Arachidic acid; 46       0.14300 -0.335  0.621 0.55700 0.927
## 40      Ribonic acid; 72        0.13600 -0.326  0.599 0.56300 0.927
## 41      Heptadecanoic acid; 60    0.13900 -0.338  0.617 0.56700 0.927
## 42      Glycine, 3TMS; 17       -0.13600 -0.609  0.337 0.57200 0.927
## 43      11-Eicosenoic acid; 35   0.13700 -0.341  0.615 0.57400 0.927
## 44      Decanoic acid; 52       0.13100 -0.343  0.605 0.58800 0.927
```

|       |                                |          |        |       |         |       |
|-------|--------------------------------|----------|--------|-------|---------|-------|
| ## 45 | 4-Hydroxyphenyllactic acid; 44 | -0.12800 | -0.603 | 0.348 | 0.59800 | 0.927 |
| ## 46 | Succinic acid, 2TMS; 7         | 0.12800  | -0.350 | 0.606 | 0.59900 | 0.927 |
| ## 47 | Hydroxylamine; 62              | 0.12500  | -0.354 | 0.604 | 0.60900 | 0.927 |
| ## 48 | Bisphenol A; 48                | -0.11800 | -0.599 | 0.362 | 0.63000 | 0.927 |
| ## 49 | Isoleucine, 2TMS; 18           | -0.11200 | -0.581 | 0.357 | 0.63900 | 0.927 |
| ## 50 | Tartronic acid; 73             | -0.11100 | -0.583 | 0.362 | 0.64700 | 0.927 |
| ## 51 | Oleic acid, TMS; 3             | 0.10800  | -0.368 | 0.584 | 0.65600 | 0.927 |
| ## 52 | 4-Hydroxybutanoic acid; 43     | -0.10700 | -0.586 | 0.371 | 0.66000 | 0.927 |
| ## 53 | Hydroxyproline; 64             | -0.09880 | -0.575 | 0.378 | 0.68400 | 0.927 |
| ## 54 | Octanoic acid; 68              | 0.09680  | -0.380 | 0.573 | 0.69000 | 0.927 |
| ## 55 | Linoleic acid, TMS; 4          | -0.09540 | -0.572 | 0.381 | 0.69500 | 0.927 |
| ## 56 | Eicosapentaenoic acid; 55      | 0.09060  | -0.378 | 0.560 | 0.70500 | 0.927 |
| ## 57 | 1-Dodecanol; 36                | 0.08810  | -0.392 | 0.568 | 0.71900 | 0.927 |
| ## 58 | 4-Deoxytetronic acid; 32       | -0.08410 | -0.558 | 0.390 | 0.72800 | 0.927 |
| ## 59 | Threonine, 3TMS; 12            | 0.08020  | -0.398 | 0.559 | 0.74200 | 0.927 |
| ## 60 | 2-Palmitoylglycerol; 39        | -0.07690 | -0.556 | 0.402 | 0.75300 | 0.927 |
| ## 61 | Leucine, 2TMS; 19              | 0.07460  | -0.398 | 0.547 | 0.75700 | 0.927 |
| ## 62 | Alanine, 2TMS; 25              | -0.07230 | -0.549 | 0.404 | 0.76600 | 0.927 |
| ## 63 | Creatinine; 50                 | -0.05080 | -0.518 | 0.416 | 0.83100 | 0.982 |
| ## 64 | Pyroglutamic acid; 69          | -0.04420 | -0.519 | 0.431 | 0.85500 | 0.982 |
| ## 65 | Phenylalanine, 2TMS; 13        | -0.04150 | -0.521 | 0.438 | 0.86500 | 0.982 |
| ## 66 | Arachidonic acid, TMS; 24      | -0.03440 | -0.513 | 0.444 | 0.88800 | 0.982 |
| ## 67 | Pyruvic acid; 31               | 0.02930  | -0.448 | 0.506 | 0.90400 | 0.982 |
| ## 68 | 3-Hydroxybutyric acid, 2TMS; 1 | 0.02010  | -0.460 | 0.500 | 0.93400 | 0.982 |
| ## 69 | Lactic acid; 29                | -0.01800 | -0.495 | 0.459 | 0.94100 | 0.982 |
| ## 70 | Glycerol; 57                   | 0.01560  | -0.464 | 0.495 | 0.94900 | 0.982 |
| ## 71 | 3-Indolepropionic acid; 41     | 0.01460  | -0.461 | 0.491 | 0.95200 | 0.982 |
| ## 72 | Dodecanoic acid; 54            | 0.01190  | -0.463 | 0.487 | 0.96100 | 0.982 |
| ## 73 | Myo inositol 6TMS; 1           | 0.00929  | -0.450 | 0.468 | 0.96800 | 0.982 |
| ## 74 | Arabinopyranose; 51            | -0.00936 | -0.486 | 0.467 | 0.96900 | 0.982 |
| ## 75 | Valine, 2TMS; 20               | 0.00142  | -0.466 | 0.469 | 0.99500 | 0.995 |



#### 6.1.4 Fully-Adjusted Model

```
## [1] "Fitting models:"  
## [1] "~ Ulcer.diagnosis.at.DATE + Age.x + Gender.x + Hba1c_baseline + CALSBP + bmi + Smoking + Statin  
## [1] ""
```

#### 6.1.4.1 Forest Plot of Model Coefficients

```
## Warning: Ignoring unknown aesthetics: x
## NULL
```

### 6.1.4.2 Tables of Model Coefficients

```

## [1] ""
## [1] "Table: Ulcer.diagnosis.at.DATEJA"
## [1] " (from model: "
## [1] " ~ Ulcer.diagnosis.at.DATE + Age.x + Gender.x +"
## [1] "      Hba1c_baseline + CALSBP + bmi + Smoking + Statin +"
## [1] "      log_Blood_TGA + Total_cholesterol + egfr + logUAER)"
## [1] ""
## [1] "No significant associations at p.adj < 0.2"
## [1] ""
## [1] "Table: Age.x"
## [1] " (from model: "
## [1] " ~ Ulcer.diagnosis.at.DATE + Age.x + Gender.x +"
## [1] "      Hba1c_baseline + CALSBP + bmi + Smoking + Statin +"
## [1] "      log_Blood_TGA + Total_cholesterol + egfr + logUAER)"
## [1] ""
##
##              Name Coefficient      CI.L      CI.R  p.value
## 1      Eicosapentaenoic acid; 55    0.02540  0.018000 0.032700 2.18e-11
## 2      Docosahexaenoic acid; 53    0.01390  0.006530 0.021400 2.32e-04
## 3  alpha-ketoglutaric acid, TMS M    0.01250  0.004970 0.020100 1.16e-03
## 4              Pyruvic acid; 31    0.01200  0.004480 0.019600 1.80e-03
## 5      alpha-Tocopherol; 26        0.01150  0.004120 0.018900 2.30e-03
## 6      Decanoic acid; 52           0.01060  0.003080 0.018100 5.70e-03
## 7      Malic acid, 3TMS; 11        0.01060  0.003080 0.018100 5.74e-03
## 8      Palmitic acid, TMS; 5       0.01040  0.002950 0.017900 6.31e-03
## 9      3-Indoleacetic acid; 40     0.01030  0.002840 0.017800 6.83e-03
## 10 4-Hydroxybenzeneacetic acid; 4  0.01010  0.002760 0.017400 7.05e-03
## 11      Glyceric acid; 30          0.00952  0.002120 0.016900 1.18e-02
## 12      Ribitol; 70                0.00957  0.002050 0.017100 1.26e-02
## 13      Nonadecanoic acid; 66      0.00954  0.002000 0.017100 1.32e-02
## 14      Oleic acid, TMS; 3         0.00911  0.001600 0.016600 1.75e-02
## 15      Myristoleic acid; 65       0.00872  0.001230 0.016200 2.24e-02
## 16      Glutamic acid, 3TMS; 8     0.00845  0.001060 0.015800 2.51e-02
## 17 2,4-Dihydroxybutanoic acid; 28  0.00818  0.000965 0.015400 2.63e-02
## 18      Succinic acid, 2TMS; 7     0.00835  0.000811 0.015900 3.00e-02
## 19      Fumaric acid, 2TMS; 9     0.00804  0.000517 0.015600 3.62e-02
## 20      11-Eicosenoic acid; 35     0.00787  0.000312 0.015400 4.13e-02
## 21      Stearic acid, TMS; 2       0.00775  0.000236 0.015300 4.32e-02
## 22      Alanine, 2TMS; 25          0.00772  0.000200 0.015200 4.42e-02
## 23      Tartronic acid; 73         0.00757  0.000111 0.015000 4.67e-02
## 24      Heptadecanoic acid; 61     0.00736  -0.000182 0.014900 5.58e-02
## 25      Glycerol; 57               0.00737  -0.000202 0.014900 5.64e-02
## 26      Dodecanoic acid; 54        0.00724  -0.000268 0.014700 5.87e-02
## 27      Myo inositol 6TMS; 1       0.00691  -0.000268 0.014100 5.92e-02
## 28      Tyrosine; 75               0.00699  -0.000537 0.014500 6.87e-02
## 29      Hydroxylamine; 62          -0.00701 -0.014600 0.000561 6.95e-02
##
##      p.adj
## 1  1.64e-09
## 2  8.69e-03
## 3  2.91e-02
## 4  3.37e-02
## 5  3.45e-02
## 6  5.29e-02

```

```

## 7 5.29e-02
## 8 5.29e-02
## 9 5.29e-02
## 10 5.29e-02
## 11 7.61e-02
## 12 7.61e-02
## 13 7.61e-02
## 14 9.38e-02
## 15 1.12e-01
## 16 1.16e-01
## 17 1.16e-01
## 18 1.25e-01
## 19 1.43e-01
## 20 1.51e-01
## 21 1.51e-01
## 22 1.51e-01
## 23 1.52e-01
## 24 1.64e-01
## 25 1.64e-01
## 26 1.64e-01
## 27 1.64e-01
## 28 1.80e-01
## 29 1.80e-01
## [1] ""
## [1] "Table: Gender.x"
## [1] " (from model: "
## [1] " ~ Ulcer.diagnosis.at.DATE + Age.x + Gender.x +"
## [1] " Hba1c_baseline + CALSBP + bmi + Smoking + Statin +"
## [1] " log_Blood_TGA + Total_cholesterol + egfr + logUAER)"
## [1] ""
##
## Name Coefficient CI.L CI.R p.value
## 1 4-Deoxytetrionic acid; 33 0.406 0.24200 0.57100 1.38e-06
## 2 Tartronic acid; 73 -0.385 -0.55100 -0.21900 5.58e-06
## 3 Glyceric acid; 30 -0.364 -0.52800 -0.19900 1.57e-05
## 4 Proline, 2TMS; 21 0.360 0.19400 0.52600 2.21e-05
## 5 Methionine, 2TMS; 16 0.359 0.19300 0.52500 2.40e-05
## 6 Myristoleic acid; 65 -0.357 -0.52300 -0.19000 2.76e-05
## 7 Valine, 2TMS; 20 0.338 0.17400 0.50100 5.36e-05
## 8 Leucine, 2TMS; 19 0.313 0.14700 0.47900 2.18e-04
## 9 Cholesterol, TMS; 23 -0.301 -0.46300 -0.14000 2.54e-04
## 10 Oleic acid, TMS; 3 -0.301 -0.46800 -0.13400 4.28e-04
## 11 Dodecanoic acid; 54 -0.293 -0.46000 -0.12600 5.89e-04
## 12 Citric acid, 4TMS; 6 -0.285 -0.45000 -0.12000 7.15e-04
## 13 Glycine, 3TMS; 17 -0.279 -0.44500 -0.11300 1.00e-03
## 14 Isoleucine, 2TMS; 18 0.268 0.10300 0.43200 1.43e-03
## 15 Hydroxyproline; 64 0.266 0.09910 0.43400 1.82e-03
## 16 2-hydroxy Isovaleric acid; 38 0.255 0.08780 0.42300 2.83e-03
## 17 Decanoic acid; 52 -0.251 -0.41800 -0.08420 3.20e-03
## 18 Aminomalonic acid; 45 -0.250 -0.41600 -0.08360 3.24e-03
## 19 Docosahexaenoic acid; 53 -0.246 -0.41100 -0.08070 3.54e-03
## 20 Stearic acid, TMS; 2 -0.248 -0.41500 -0.08100 3.65e-03
## 21 Glutamic acid, 3TMS; 8 0.226 0.06140 0.39000 7.14e-03
## 22 Succinic acid, 2TMS; 7 -0.228 -0.39600 -0.06060 7.66e-03
## 23 Palmitic acid, TMS; 5 -0.225 -0.39100 -0.05830 8.17e-03

```

```

## 24      Tridecanoic acid; 74      -0.222 -0.39000 -0.05440 9.48e-03
## 25      Nonadecanoic acid; 66     -0.209 -0.37700 -0.04130 1.46e-02
## 26      Heptadecanoic acid; 61    -0.204 -0.37200 -0.03670 1.69e-02
## 27      Heptadecanoic acid; 60    -0.190 -0.35700 -0.02170 2.69e-02
## 28              Tyrosine; 75      -0.184 -0.35200 -0.01700 3.09e-02
## 29              Glycerol; 57      -0.167 -0.33500  0.00184 5.26e-02
## 30              1-Monopalmitin; 37  0.165 -0.00352  0.33400 5.50e-02
## 31      Benzeneacetic acid; 47     -0.162 -0.32900  0.00461 5.67e-02
##      p.adj
## 1  0.000104
## 2  0.000209
## 3  0.000345
## 4  0.000345
## 5  0.000345
## 6  0.000345
## 7  0.000574
## 8  0.002050
## 9  0.002110
## 10 0.003210
## 11 0.004020
## 12 0.004470
## 13 0.005780
## 14 0.007650
## 15 0.009080
## 16 0.013300
## 17 0.013500
## 18 0.013500
## 19 0.013700
## 20 0.013700
## 21 0.025500
## 22 0.026100
## 23 0.026600
## 24 0.029600
## 25 0.043900
## 26 0.048900
## 27 0.074600
## 28 0.082700
## 29 0.136000
## 30 0.137000
## 31 0.137000
## [1] ""
## [1] "Table: Hba1c_baseline"
## [1] " (from model: "
## [1] " ~ Ulcer.diagnosis.at.DATE + Age.x + Gender.x +"
## [1] "      Hba1c_baseline + CALSBP + bmi + Smoking + Statin +"
## [1] "      log_Blood_TGA + Total_cholesterol + egfr + logUAER)"
## [1] ""
##      Name Coefficient      CI.L      CI.R p.value p.adj
## 1      Valine, 2TMS; 20      0.1330 0.06010 0.20600 0.000363 0.0118
## 2      Ethanolamine; 56      0.1350 0.05950 0.21000 0.000448 0.0118
## 3      Alanine, 2TMS; 25      0.1290 0.05470 0.20400 0.000696 0.0118
## 4      Eicosapentaenoic acid; 55 -0.1260 -0.19900 -0.05250 0.000783 0.0118
## 5      Arabinopyranose; 51      0.1280 0.05340 0.20300 0.000788 0.0118
## 6      Docosahexaenoic acid; 53 -0.1100 -0.18400 -0.03680 0.003310 0.0384

```

```

## 7      Citric acid, 4TMS; 6      0.1100  0.03590  0.18300  0.003590  0.0384
## 8      Decanoic acid; 52      -0.0953 -0.17000 -0.02080  0.012200  0.0921
## 9      Glyceric acid; 30      -0.0941 -0.16800 -0.02050  0.012300  0.0921
## 10 4-Hydroxybutanoic acid; 43  -0.0955 -0.17100 -0.02050  0.012700  0.0921
## 11      Tridecanoic acid; 74    -0.0945 -0.16900 -0.01950  0.013500  0.0921
## 12      Campesterol; 49      0.0853  0.01190  0.15900  0.022800  0.1420
## 13      Glyceryl-glycoside; 59   0.0845  0.01020  0.15900  0.025900  0.1490
## 14      Lactic acid; 29      0.0834  0.00870  0.15800  0.028700  0.1540
## 15      Leucine, 2TMS; 19      0.0803  0.00633  0.15400  0.033400  0.1670
## 16 4-Deoxytetroneic acid; 33   -0.0771 -0.15000 -0.00363  0.039700  0.1830
## 17      Myristoleic acid; 65    -0.0773 -0.15200 -0.00297  0.041500  0.1830
## 18      Ribitol; 70      -0.0767 -0.15100 -0.00201  0.044200  0.1840
## [1] ""
## [1] "Table: CALSBP"
## [1] " (from model: "
## [1] " ~ Ulcer.diagnosis.at.DATE + Age.x + Gender.x +"
## [1] "      Hba1c_baseline + CALSBP + bmi + Smoking + Statin +"
## [1] "      log_Blood_TGA + Total_cholesterol + egfr + logUAER)"
## [1] ""
##
##          Name Coefficient      CI.L      CI.R p.value p.adj
## 1 Myristoleic acid; 65      0.00793 0.00302 0.0129 0.00158 0.118
## [1] ""
## [1] "Table: bmi"
## [1] " (from model: "
## [1] " ~ Ulcer.diagnosis.at.DATE + Age.x + Gender.x +"
## [1] "      Hba1c_baseline + CALSBP + bmi + Smoking + Statin +"
## [1] "      log_Blood_TGA + Total_cholesterol + egfr + logUAER)"
## [1] ""
##
##          Name Coefficient      CI.L      CI.R p.value
## 1      Glutamic acid, 3TMS; 8      0.0442  0.023600  0.06480  2.76e-05
## 2      Campesterol; 49      -0.0405 -0.061100 -0.01990  1.22e-04
## 3 2-Hydroxybutyric acid, 2TMS; 2    0.0402  0.019600  0.06080  1.30e-04
## 4      Decanoic acid; 52      -0.0351 -0.056000 -0.01430  9.86e-04
## 5 2,4-Dihydroxybutanoic acid; 28   -0.0290 -0.049100 -0.00888  4.76e-03
## 6      Lactic acid; 29      0.0299  0.008900  0.05080  5.27e-03
## 7      Pyruvic acid; 31      -0.0290 -0.050000 -0.00803  6.78e-03
## 8      alpha-Tocopherol; 26     -0.0284 -0.049000 -0.00773  7.08e-03
## 9      1,3-Propanediol; 34     -0.0285 -0.049600 -0.00740  8.15e-03
## 10     Arachidic acid; 46     -0.0271 -0.048100 -0.00611  1.14e-02
## 11     Citric acid, 4TMS; 6     -0.0266 -0.047300 -0.00595  1.16e-02
## 12     Pyroglutamic acid; 69    -0.0258 -0.046600 -0.00489  1.56e-02
## 13     Dodecanoic acid; 54     -0.0240 -0.044900 -0.00308  2.46e-02
## 14     Nonadecanoic acid; 66    -0.0241 -0.045100 -0.00309  2.46e-02
## 15     11-Eicosenoic acid; 35    0.0241  0.003020  0.04520  2.50e-02
## 16     Tartronic acid; 73     -0.0225 -0.043300 -0.00172  3.38e-02
## 17     Glycine, 3TMS; 17     -0.0224 -0.043200 -0.00160  3.48e-02
## 18 alpha-ketoglutaric acid, TMS M  -0.0225 -0.043600 -0.00151  3.57e-02
## 19     Isoleucine, 2TMS; 18     0.0218  0.001180  0.04230  3.82e-02
## 20     Ribitol; 70      0.0211  0.000183  0.04210  4.80e-02
##
##          p.adj
## 1 0.00207
## 2 0.00324
## 3 0.00324
## 4 0.01850

```

```

## 5 0.06580
## 6 0.06580
## 7 0.06630
## 8 0.06630
## 9 0.06790
## 10 0.07930
## 11 0.07930
## 12 0.09740
## 13 0.12500
## 14 0.12500
## 15 0.12500
## 16 0.14900
## 17 0.14900
## 18 0.14900
## 19 0.15100
## 20 0.18000
## [1] ""
## [1] "Table: Smoking"
## [1] " (from model: "
## [1] " ~ Ulcer.diagnosis.at.DATE + Age.x + Gender.x +"
## [1] "      Hba1c_baseline + CALSBP + bmi + Smoking + Statin +"
## [1] "      log_Blood_TGA + Total_cholesterol + egfr + logUAER)"
## [1] ""
##
## Name Coefficient CI.L CI.R p.value p.adj
## 1 3-Indolepropionic acid; 41 -0.352 -0.551 -0.1530 0.000524 0.0167
## 2 Docosahexaenoic acid; 53 -0.338 -0.534 -0.1420 0.000740 0.0167
## 3 Tartronic acid; 73 -0.338 -0.536 -0.1410 0.000782 0.0167
## 4 Glutamic acid, 3TMS; 8 0.332 0.136 0.5280 0.000891 0.0167
## 5 Valine, 2TMS; 20 -0.307 -0.502 -0.1120 0.002010 0.0301
## 6 alpha-Tocopherol; 26 -0.297 -0.493 -0.1010 0.002990 0.0331
## 7 Glyceric acid; 30 -0.296 -0.492 -0.1000 0.003090 0.0331
## 8 Benzeneacetic acid; 47 -0.266 -0.465 -0.0674 0.008700 0.0748
## 9 Citric acid, 4TMS; 6 -0.262 -0.458 -0.0655 0.008980 0.0748
## 10 Malic acid, 3TMS; 11 -0.257 -0.456 -0.0580 0.011400 0.0790
## 11 Leucine, 2TMS; 19 -0.254 -0.451 -0.0569 0.011600 0.0790
## 12 Ribonic acid; 72 -0.242 -0.433 -0.0500 0.013500 0.0842
## 13 Campesterol; 49 -0.229 -0.425 -0.0339 0.021500 0.1240
## [1] ""
## [1] "Table: Statin"
## [1] " (from model: "
## [1] " ~ Ulcer.diagnosis.at.DATE + Age.x + Gender.x +"
## [1] "      Hba1c_baseline + CALSBP + bmi + Smoking + Statin +"
## [1] "      log_Blood_TGA + Total_cholesterol + egfr + logUAER)"
## [1] ""
##
## Name Coefficient CI.L CI.R p.value p.adj
## 1 Campesterol; 49 0.294 0.1110 0.4760 0.00161 0.107
## 2 Arachidonic acid, TMS; 24 0.278 0.0913 0.4640 0.00353 0.107
## 3 L-5-Oxoproline; 63 -0.272 -0.4580 -0.0854 0.00427 0.107
## 4 Glutamic acid, 3TMS; 8 0.241 0.0583 0.4230 0.00974 0.183
## [1] ""
## [1] "Table: log_Blood_TGA"
## [1] " (from model: "
## [1] " ~ Ulcer.diagnosis.at.DATE + Age.x + Gender.x +"
## [1] "      Hba1c_baseline + CALSBP + bmi + Smoking + Statin +"

```

```

## [1] "      log_Blood_TGA + Total_cholesterol + egfr + logUAER)"
## [1] ""
##
##          Name Coefficient      CI.L      CI.R  p.value
## 1      Palmitic acid, TMS; 5      0.283  0.151000  0.41400 2.70e-05
## 2          Octanoic acid; 68      0.267  0.135000  0.39900 7.69e-05
## 3      Dodecanoic acid; 54      0.262  0.130000  0.39400 1.02e-04
## 4      Arachidic acid; 46      0.263  0.131000  0.39600 1.04e-04
## 5      Stearic acid, TMS; 2      0.260  0.128000  0.39300 1.18e-04
## 6 2-Hydroxybutyric acid, 2TMS; 2  0.238  0.108000  0.36700 3.41e-04
## 7          Decanoic acid; 52      0.240  0.108000  0.37200 3.67e-04
## 8          Oleic acid, TMS; 3      0.213  0.080700  0.34500 1.62e-03
## 9          Lactic acid; 29      0.197  0.064600  0.32900 3.57e-03
## 10     Glyceryl-glycoside; 59      0.189  0.057700  0.32100 4.85e-03
## 11     Isoleucine, 2TMS; 18      0.187  0.056900  0.31700 4.86e-03
## 12     Valine, 2TMS; 20      0.185  0.055700  0.31500 5.09e-03
## 13     Heptadecanoic acid; 60      0.181  0.047900  0.31400 7.68e-03
## 14     Arabinopyranose; 51      0.172  0.039800  0.30400 1.08e-02
## 15 4-Hydroxybenzeneacetic acid; 4  0.167  0.037500  0.29600 1.15e-02
## 16     Myristoleic acid; 65      0.164  0.032800  0.29600 1.44e-02
## 17     Aminomalonic acid; 45     -0.163 -0.294000 -0.03130 1.53e-02
## 18     Ribonic acid; 72      0.157  0.029800  0.28500 1.57e-02
## 19 alpha-ketoglutaric acid, TMS M  0.161  0.027800  0.29300 1.78e-02
## 20     Pyruvic acid; 31      0.160  0.027400  0.29300 1.80e-02
## 21 3,4-Dihydroxybutanoic acid; 27  0.153  0.024800  0.28100 1.93e-02
## 22     Glutamic acid, 3TMS; 8      0.155  0.024900  0.28500 1.96e-02
## 23     Leucine, 2TMS; 19      0.155  0.023800  0.28600 2.06e-02
## 24     Heptadecanoic acid; 61      0.156  0.023000  0.28800 2.15e-02
## 25     Fumaric acid, 2TMS; 9      0.154  0.021300  0.28600 2.29e-02
## 26     Arachidonic acid, TMS; 24    0.149  0.016400  0.28200 2.77e-02
## 27     Malic acid, 3TMS; 11      0.140  0.008280  0.27300 3.73e-02
## 28     Nonadecanoic acid; 66      0.138  0.005230  0.27100 4.16e-02
## 29     Succinic acid, 2TMS; 7      0.134  0.001190  0.26700 4.80e-02
## 30     4-Hydroxybutanoic acid; 43   0.134  0.000579  0.26700 4.90e-02
## 31     Glyceric acid; 30     -0.129 -0.259000  0.00136 5.24e-02
## 32     1,3-Propanediol; 34      0.131 -0.002490  0.26400 5.44e-02
## 33     Proline, 2TMS; 21      0.126 -0.005160  0.25800 5.97e-02
## 34     Ribitol; 71      0.121 -0.005610  0.24800 6.10e-02
## 35     3-Indolepropionic acid; 41   -0.122 -0.254000  0.01040 7.10e-02
## 36     Glycine, 3TMS; 17     -0.115 -0.246000  0.01680 8.73e-02
## 37     Tartronic acid; 73     -0.114 -0.245000  0.01710 8.82e-02
## 38     4-Deoxytetronic acid; 33    0.110 -0.019700  0.24000 9.63e-02
##
##      p.adj
## 1 0.00177
## 2 0.00177
## 3 0.00177
## 4 0.00177
## 5 0.00177
## 6 0.00394
## 7 0.00394
## 8 0.01510
## 9 0.02970
## 10 0.03180
## 11 0.03180
## 12 0.03180

```



```

## 13 0.04430
## 14 0.05730
## 15 0.05730
## 16 0.06520
## 17 0.06520
## 18 0.06520
## 19 0.06670
## 20 0.06670
## 21 0.06670
## 22 0.06670
## 23 0.06730
## 24 0.06730
## 25 0.06880
## 26 0.07980
## 27 0.10400
## 28 0.11200
## 29 0.12300
## 30 0.12300
## 31 0.12700
## 32 0.12800
## 33 0.13500
## 34 0.13500
## 35 0.15200
## 36 0.17900
## 37 0.17900
## 38 0.19000
## [1] ""
## [1] "Table: Total_cholesterol"
## [1] " (from model: "
## [1] " ~ Ulcer.diagnosis.at.DATE + Age.x + Gender.x +"
## [1] "      Hba1c_baseline + CALSBP + bmi + Smoking + Statin +"
## [1] "      log_Blood_TGA + Total_cholesterol + egfr + logUAER)"
## [1] ""
##
##              Name Coefficient      CI.L      CI.R  p.value
## 1      Cholesterol, TMS; 23      0.4550  0.36000  0.549000 1.60e-20
## 2      Campesterol; 49      0.3790  0.28200  0.475000 2.60e-14
## 3      alpha-Tocopherol; 26      0.3290  0.23200  0.425000 3.62e-11
## 4      Linoleic acid, TMS; 4      0.1820  0.08430  0.281000 2.76e-04
## 5      Benzeneacetic acid; 47     -0.1820 -0.28000 -0.084100 2.78e-04
## 6      4-Hydroxybutanoic acid; 43 -0.1720 -0.27100 -0.073200 6.55e-04
## 7      Isoleucine, 2TMS; 18     -0.1620 -0.25800 -0.065400 1.02e-03
## 8      L-5-Oxoproline; 63     -0.1640 -0.26300 -0.065800 1.09e-03
## 9      Proline, 2TMS; 21     -0.1620 -0.26000 -0.064400 1.15e-03
## 10     Tyrosine; 75     -0.1620 -0.26000 -0.063500 1.27e-03
## 11     Methionine, 2TMS; 16     -0.1560 -0.25300 -0.058200 1.77e-03
## 12     Eicosapentaenoic acid; 55  0.1540  0.05720  0.250000 1.80e-03
## 13     Docosahexaenoic acid; 53  0.1480  0.05120  0.245000 2.76e-03
## 14     Glycine, 3TMS; 17     -0.1470 -0.24500 -0.049800 3.08e-03
## 15     Threonine, 3TMS; 12     -0.1440 -0.24200 -0.045000 4.34e-03
## 16     Alanine, 2TMS; 25     -0.1380 -0.23600 -0.039700 5.96e-03
## 17     Malic acid, 3TMS; 11     -0.1350 -0.23300 -0.037100 6.93e-03
## 18     Arabinopyranose; 51     -0.1320 -0.23000 -0.033600 8.54e-03
## 19     4-Hydroxybenzeneacetic acid; 4 -0.1260 -0.22200 -0.029800 1.02e-02
## 20     Glyceryl-glycoside; 59   -0.1260 -0.22400 -0.028500 1.14e-02

```

|       |                                |                  |          |           |          |
|-------|--------------------------------|------------------|----------|-----------|----------|
| ## 21 | 2-Palmitoylglycerol; 39        | 0.1280           | 0.02880  | 0.226000  | 1.14e-02 |
| ## 22 | Hydroxylamine; 62              | -0.1270          | -0.22600 | -0.027800 | 1.21e-02 |
| ## 23 | 2,4-Dihydroxybutanoic acid; 28 | -0.1180          | -0.21200 | -0.023300 | 1.46e-02 |
| ## 24 | Serine, 3TMS; 14               | -0.1150          | -0.21300 | -0.016400 | 2.22e-02 |
| ## 25 | 3-Indoleacetic acid; 40        | -0.1110          | -0.20900 | -0.013500 | 2.57e-02 |
| ## 26 | Ribitol; 71                    | -0.1050          | -0.19900 | -0.011000 | 2.86e-02 |
| ## 27 | Ribonic acid; 72               | -0.1030          | -0.19800 | -0.008590 | 3.25e-02 |
| ## 28 | Phenylalanine, 2TMS; 13        | -0.0996          | -0.19800 | -0.000782 | 4.82e-02 |
| ## 29 | Ethanolamine; 56               | -0.0964          | -0.19500 | 0.002240  | 5.54e-02 |
| ## 30 | Pyruvic acid; 31               | -0.0955          | -0.19400 | 0.002940  | 5.72e-02 |
| ## 31 | 3,4-Dihydroxybutanoic acid; 27 | -0.0888          | -0.18400 | 0.006250  | 6.71e-02 |
| ## 32 | Palmitic acid, TMS; 5          | 0.0899           | -0.00784 | 0.188000  | 7.14e-02 |
| ## 33 | Leucine, 2TMS; 19              | -0.0887          | -0.18600 | 0.008620  | 7.40e-02 |
| ## 34 | 3-Indolepropionic acid; 41     | 0.0861           | -0.01200 | 0.184000  | 8.54e-02 |
| ## 35 | 2-Hydroxybutyric acid, 2TMS; 2 | 0.0830           | -0.01340 | 0.179000  | 9.14e-02 |
| ##    | p.adj                          |                  |          |           |          |
| ## 1  |                                | 1.20e-18         |          |           |          |
| ## 2  |                                | 9.76e-13         |          |           |          |
| ## 3  |                                | 9.04e-10         |          |           |          |
| ## 4  |                                | 4.17e-03         |          |           |          |
| ## 5  |                                | 4.17e-03         |          |           |          |
| ## 6  |                                | 8.18e-03         |          |           |          |
| ## 7  |                                | 9.52e-03         |          |           |          |
| ## 8  |                                | 9.52e-03         |          |           |          |
| ## 9  |                                | 9.52e-03         |          |           |          |
| ## 10 |                                | 9.52e-03         |          |           |          |
| ## 11 |                                | 1.13e-02         |          |           |          |
| ## 12 |                                | 1.13e-02         |          |           |          |
| ## 13 |                                | 1.59e-02         |          |           |          |
| ## 14 |                                | 1.65e-02         |          |           |          |
| ## 15 |                                | 2.17e-02         |          |           |          |
| ## 16 |                                | 2.79e-02         |          |           |          |
| ## 17 |                                | 3.06e-02         |          |           |          |
| ## 18 |                                | 3.56e-02         |          |           |          |
| ## 19 |                                | 4.04e-02         |          |           |          |
| ## 20 |                                | 4.08e-02         |          |           |          |
| ## 21 |                                | 4.08e-02         |          |           |          |
| ## 22 |                                | 4.11e-02         |          |           |          |
| ## 23 |                                | 4.76e-02         |          |           |          |
| ## 24 |                                | 6.95e-02         |          |           |          |
| ## 25 |                                | 7.71e-02         |          |           |          |
| ## 26 |                                | 8.26e-02         |          |           |          |
| ## 27 |                                | 9.04e-02         |          |           |          |
| ## 28 |                                | 1.29e-01         |          |           |          |
| ## 29 |                                | 1.43e-01         |          |           |          |
| ## 30 |                                | 1.43e-01         |          |           |          |
| ## 31 |                                | 1.62e-01         |          |           |          |
| ## 32 |                                | 1.67e-01         |          |           |          |
| ## 33 |                                | 1.68e-01         |          |           |          |
| ## 34 |                                | 1.88e-01         |          |           |          |
| ## 35 |                                | 1.96e-01         |          |           |          |
| ##    | [1]                            | "                |          |           |          |
| ##    | [1]                            | "Table: egfr"    |          |           |          |
| ##    | [1]                            | " (from model: " |          |           |          |

```

## [1] " ~ Ulcer.diagnosis.at.DATE + Age.x + Gender.x +"
## [1] " Hba1c_baseline + CALSBP + bmi + Smoking + Statin +"
## [1] " log_Blood_TGA + Total_cholesterol + egfr + logUAER)"
## [1] ""
##
## Name Coefficient CI.L CI.R p.value
## 1 Myo inositol 6TMS; 1 -0.01630 -1.94e-02 -0.013100 2.37e-23
## 2 Ribitol; 71 -0.01520 -1.83e-02 -0.012000 2.04e-20
## 3 Creatinine; 50 -0.01510 -1.83e-02 -0.011900 1.31e-19
## 4 2,4-Dihydroxybutanoic acid; 28 -0.01480 -1.79e-02 -0.011600 2.20e-19
## 5 Ribonic acid; 72 -0.01350 -1.67e-02 -0.010400 1.51e-16
## 6 3,4-Dihydroxybutanoic acid; 27 -0.01140 -1.46e-02 -0.008180 4.28e-12
## 7 4-Deoxytetroneic acid; 33 -0.01130 -1.45e-02 -0.008020 1.47e-11
## 8 4-Hydroxybenzeneacetic acid; 4 -0.01120 -1.44e-02 -0.007960 1.51e-11
## 9 Isoleucine, 2TMS; 18 0.00971 6.47e-03 0.013000 5.35e-09
## 10 4-Deoxytetroneic acid; 32 -0.00902 -1.23e-02 -0.005750 7.44e-08
## 11 Citric acid, 4TMS; 6 -0.00886 -1.21e-02 -0.005600 1.11e-07
## 12 Pyroglutamic acid; 69 -0.00893 -1.22e-02 -0.005630 1.20e-07
## 13 2-Hydroxybutyric acid, 2TMS; 2 0.00786 4.62e-03 0.011100 2.14e-06
## 14 4-Hydroxyphenyllactic acid; 44 -0.00781 -1.11e-02 -0.004520 3.51e-06
## 15 Valine, 2TMS; 20 0.00760 4.36e-03 0.010800 4.39e-06
## 16 3-Indoleacetic acid; 40 -0.00751 -1.08e-02 -0.004230 7.60e-06
## 17 Glyceryl-glycoside; 59 -0.00650 -9.79e-03 -0.003210 1.12e-04
## 18 Hydroxyproline; 64 -0.00650 -9.81e-03 -0.003200 1.18e-04
## 19 Leucine, 2TMS; 19 0.00625 2.97e-03 0.009520 1.88e-04
## 20 Serine, 3TMS; 14 0.00618 2.88e-03 0.009490 2.51e-04
## 21 Glycine, 3TMS; 17 -0.00592 -9.20e-03 -0.002640 4.14e-04
## 22 Fumaric acid, 2TMS; 9 -0.00585 -9.16e-03 -0.002550 5.31e-04
## 23 Eicosapentaenoic acid; 55 0.00514 1.90e-03 0.008390 1.90e-03
## 24 Stearic acid, TMS; 2 0.00502 1.72e-03 0.008330 2.91e-03
## 25 Methionine, 2TMS; 16 0.00497 1.69e-03 0.008250 3.04e-03
## 26 Malic acid, 3TMS; 11 -0.00426 -7.56e-03 -0.000953 1.16e-02
## 27 Benzeneacetic acid; 47 -0.00405 -7.35e-03 -0.000749 1.62e-02
## 28 Palmitic acid, TMS; 5 0.00386 5.72e-04 0.007150 2.14e-02
## 29 Octanoic acid; 68 0.00386 5.57e-04 0.007160 2.20e-02
## 30 Tyrosine; 75 0.00377 4.67e-04 0.007080 2.53e-02
## 31 Glycerol; 57 0.00369 3.62e-04 0.007020 2.98e-02
## 32 Aminomalonic acid; 45 -0.00360 -6.88e-03 -0.000317 3.16e-02
## 33 Alanine, 2TMS; 25 -0.00353 -6.84e-03 -0.000226 3.63e-02
## 34 Cholesterol, TMS; 23 0.00322 2.88e-05 0.006400 4.80e-02
## 35 2-hydroxy Isovaleric acid; 38 0.00308 -2.27e-04 0.006390 6.79e-02
## 36 Glycerol; 58 -0.00304 -6.38e-03 0.000292 7.37e-02
## 37 2-Palmitoylglycerol; 39 0.00302 -3.04e-04 0.006340 7.50e-02
## 38 Campesterol; 49 -0.00276 -6.01e-03 0.000494 9.65e-02
## 39 Succinic acid, 2TMS; 7 -0.00280 -6.11e-03 0.000520 9.84e-02
## 40 Glutamic acid, 3TMS; 8 0.00270 -5.53e-04 0.005950 1.04e-01
##
## p.adj
## 1 1.78e-21
## 2 7.63e-19
## 3 3.29e-18
## 4 4.12e-18
## 5 2.26e-15
## 6 5.35e-11
## 7 1.41e-10
## 8 1.41e-10

```

```

## 9 4.46e-08
## 10 5.58e-07
## 11 7.52e-07
## 12 7.52e-07
## 13 1.24e-05
## 14 1.88e-05
## 15 2.20e-05
## 16 3.56e-05
## 17 4.93e-04
## 18 4.93e-04
## 19 7.43e-04
## 20 9.40e-04
## 21 1.48e-03
## 22 1.81e-03
## 23 6.20e-03
## 24 9.09e-03
## 25 9.11e-03
## 26 3.34e-02
## 27 4.50e-02
## 28 5.70e-02
## 29 5.70e-02
## 30 6.34e-02
## 31 7.21e-02
## 32 7.41e-02
## 33 8.24e-02
## 34 1.06e-01
## 35 1.46e-01
## 36 1.52e-01
## 37 1.52e-01
## 38 1.89e-01
## 39 1.89e-01
## 40 1.95e-01
## [1] ""
## [1] "Table: logUAER"
## [1] " (from model: "
## [1] " ~ Ulcer.diagnosis.at.DATE + Age.x + Gender.x +"
## [1] " Hba1c_baseline + CALSBP + bmi + Smoking + Statin +"
## [1] " log_Blood_TGA + Total_cholesterol + egfr + logUAER)"
## [1] ""
##
## Name Coefficient CI.L CI.R p.value p.adj
## 1 3,4-Dihydroxybutanoic acid; 27 0.0744 0.0344 0.114 0.000272 0.0204
## 2 4-Deoxytetronic acid; 32 0.0644 0.0234 0.105 0.002080 0.0781

```

### 6.1.4.3 Table with All Metabolites

```
## [1] ""
## [1] "Table: Ulcer.diagnosis.at.DATEJA"
## [1] " (from model: "
## [1] " ~ Ulcer.diagnosis.at.DATE + Age.x + Gender.x +"
## [1] "      Hba1c_baseline + CALSBP + bmi + Smoking + Statin +"
## [1] "      log_Blood_TGA + Total_cholesterol + egfr + logUAER)"
## [1] ""
##
##          Name Coefficient   CI.L   CI.R p.value p.adj
## 1      Citric acid, 4TMS; 6  -0.52900 -1.0100 -0.0442 0.0325 0.980
## 2 2-Hydroxybutyric acid, 2TMS; 2  -0.45800 -0.9400 0.0235 0.0623 0.980
## 3      Nonadecanoic acid; 66    0.40000 -0.0923 0.8930 0.1110 0.980
## 4          Tyrosine; 75      0.39400 -0.0973 0.8860 0.1160 0.980
## 5      Benzeneacetic acid; 47  -0.38800 -0.8790 0.1020 0.1210 0.980
## 6          Serine, 3TMS; 14   -0.36400 -0.8550 0.1270 0.1460 0.980
## 7      Glyceryl-glycoside; 59  -0.33500 -0.8240 0.1540 0.1800 0.980
## 8          Glycerol; 58      0.33500 -0.1610 0.8310 0.1850 0.980
## 9      Cholesterol, TMS; 23   -0.31800 -0.7920 0.1550 0.1880 0.980
## 10 4-Hydroxybenzeneacetic acid; 4  -0.30600 -0.7860 0.1740 0.2110 0.980
## 11 3,4-Dihydroxybutanoic acid; 27  -0.29500 -0.7710 0.1800 0.2230 0.980
## 12 2,4-Dihydroxybutanoic acid; 28  -0.29200 -0.7630 0.1800 0.2250 0.980
## 13      Heptadecanoic acid; 61    0.30100 -0.1920 0.7940 0.2310 0.980
## 14      Palmitic acid, TMS; 5     0.29500 -0.1940 0.7840 0.2370 0.980
## 15      alpha-Tocopherol; 26   -0.27700 -0.7600 0.2070 0.2620 0.980
## 16      Nonanoic acid; 67       0.28300 -0.2120 0.7790 0.2620 0.980
## 17      4-Deoxytetroneic acid; 33  -0.27200 -0.7550 0.2110 0.2690 0.980
## 18      L-5-Oxoproline; 63      -0.27400 -0.7670 0.2180 0.2750 0.980
## 19 2-hydroxy Isovaleric acid; 38   -0.26600 -0.7580 0.2260 0.2890 0.980
## 20      3-Indoleacetic acid; 40   -0.23900 -0.7270 0.2490 0.3360 0.980
## 21      Stearic acid, TMS; 2     0.24000 -0.2520 0.7310 0.3390 0.980
## 22      Malic acid, 3TMS; 11     0.22900 -0.2620 0.7200 0.3610 0.980
## 23      Myristoleic acid; 65     0.22200 -0.2670 0.7110 0.3730 0.980
## 24      Ribitol; 70            -0.22200 -0.7130 0.2690 0.3760 0.980
## 25      Glutamic acid, 3TMS; 8   -0.20800 -0.6910 0.2760 0.3990 0.980
## 26      Tridecanoic acid; 74     0.20700 -0.2860 0.7010 0.4090 0.980
## 27      Methionine, 2TMS; 16     0.19900 -0.2900 0.6870 0.4250 0.980
## 28      Succinic acid, 2TMS; 7    0.19600 -0.2970 0.6890 0.4350 0.980
## 29      Aminomalonic acid; 45    -0.19400 -0.6820 0.2940 0.4350 0.980
## 30      Ribitol; 71            0.18700 -0.2840 0.6580 0.4370 0.980
## 31      Isoleucine, 2TMS; 18    -0.19100 -0.6740 0.2910 0.4370 0.980
## 32      Fumaric acid, 2TMS; 9    -0.18600 -0.6770 0.3060 0.4580 0.980
## 33      Campesterol; 49         -0.17300 -0.6560 0.3100 0.4830 0.980
## 34      1,3-Propanediol; 34     0.17300 -0.3220 0.6670 0.4940 0.980
## 35      Heptadecanoic acid; 60    0.17200 -0.3210 0.6650 0.4950 0.980
## 36      4-Deoxytetroneic acid; 32  -0.15500 -0.6420 0.3320 0.5320 0.980
## 37      11-Eicosenoic acid; 35    0.15000 -0.3440 0.6440 0.5520 0.980
## 38      Proline, 2TMS; 21       0.14800 -0.3400 0.6360 0.5530 0.980
## 39      Glycine, 3TMS; 17      -0.14600 -0.6340 0.3420 0.5570 0.980
## 40      Ethanolamine; 56        0.14600 -0.3470 0.6400 0.5610 0.980
## 41      1-Monopalmitin; 37      -0.14700 -0.6420 0.3490 0.5620 0.980
## 42      Arachidic acid; 46       0.14300 -0.3500 0.6350 0.5700 0.980
## 43      Bisphenol A; 48        -0.13200 -0.6280 0.3640 0.6010 0.980
## 44      Hydroxyproline; 64      -0.12500 -0.6160 0.3670 0.6190 0.980
```

|       |                                |          |         |        |        |       |
|-------|--------------------------------|----------|---------|--------|--------|-------|
| ## 45 | Linoleic acid, TMS; 4          | -0.11500 | -0.6060 | 0.3760 | 0.6450 | 0.980 |
| ## 46 | Glyceric acid; 30              | -0.11200 | -0.5960 | 0.3720 | 0.6500 | 0.980 |
| ## 47 | Alanine, 2TMS; 25              | -0.11300 | -0.6040 | 0.3780 | 0.6520 | 0.980 |
| ## 48 | Decanoic acid; 52              | 0.10800  | -0.3820 | 0.5970 | 0.6660 | 0.980 |
| ## 49 | Ribonic acid; 72               | 0.10100  | -0.3720 | 0.5750 | 0.6750 | 0.980 |
| ## 50 | Octanoic acid; 68              | 0.10400  | -0.3870 | 0.5950 | 0.6780 | 0.980 |
| ## 51 | Hydroxylamine; 62              | 0.10200  | -0.3920 | 0.5970 | 0.6850 | 0.980 |
| ## 52 | 4-Hydroxybutanoic acid; 43     | -0.09950 | -0.5930 | 0.3940 | 0.6930 | 0.980 |
| ## 53 | 2-Palmitoylglycerol; 39        | -0.09410 | -0.5880 | 0.4000 | 0.7090 | 0.980 |
| ## 54 | 1-Dodecanol; 36                | 0.08940  | -0.4060 | 0.5850 | 0.7230 | 0.980 |
| ## 55 | alpha-ketoglutaric acid, TMS M | 0.08120  | -0.4120 | 0.5740 | 0.7470 | 0.980 |
| ## 56 | Myo inositol 6TMS; 1           | -0.07490 | -0.5440 | 0.3950 | 0.7540 | 0.980 |
| ## 57 | Eicosapentaenoic acid; 55      | 0.07480  | -0.4070 | 0.5570 | 0.7610 | 0.980 |
| ## 58 | 4-Hydroxyphenyllactic acid; 44 | -0.07380 | -0.5630 | 0.4160 | 0.7680 | 0.980 |
| ## 59 | Creatinine; 50                 | -0.07050 | -0.5500 | 0.4090 | 0.7730 | 0.980 |
| ## 60 | Oleic acid, TMS; 3             | 0.06250  | -0.4280 | 0.5530 | 0.8030 | 0.980 |
| ## 61 | Tartronic acid; 73             | -0.05800 | -0.5450 | 0.4290 | 0.8150 | 0.980 |
| ## 62 | Arabinopyranose; 51            | -0.05120 | -0.5420 | 0.4400 | 0.8380 | 0.980 |
| ## 63 | Docosahexaenoic acid; 53       | -0.04800 | -0.5320 | 0.4360 | 0.8460 | 0.980 |
| ## 64 | Phenylalanine, 2TMS; 13        | -0.04120 | -0.5360 | 0.4530 | 0.8700 | 0.980 |
| ## 65 | Valine, 2TMS; 20               | -0.03910 | -0.5200 | 0.4420 | 0.8730 | 0.980 |
| ## 66 | Pyruvic acid; 31               | -0.03800 | -0.5310 | 0.4550 | 0.8800 | 0.980 |
| ## 67 | Pyroglutamic acid; 69          | -0.03640 | -0.5260 | 0.4530 | 0.8840 | 0.980 |
| ## 68 | Arachidonic acid, TMS; 24      | -0.03520 | -0.5290 | 0.4580 | 0.8890 | 0.980 |
| ## 69 | Lactic acid; 29                | 0.03010  | -0.4610 | 0.5220 | 0.9040 | 0.983 |
| ## 70 | 3-Indolepropionic acid; 41     | 0.02100  | -0.4700 | 0.5120 | 0.9330 | 0.992 |
| ## 71 | 3-Hydroxybutyric acid, 2TMS; 1 | -0.01670 | -0.5130 | 0.4790 | 0.9470 | 0.992 |
| ## 72 | Threonine, 3TMS; 12            | 0.01040  | -0.4830 | 0.5040 | 0.9670 | 0.992 |
| ## 73 | Leucine, 2TMS; 19              | 0.00692  | -0.4800 | 0.4940 | 0.9780 | 0.992 |
| ## 74 | Glycerol; 57                   | -0.00309 | -0.4980 | 0.4920 | 0.9900 | 0.992 |
| ## 75 | Dodecanoic acid; 54            | -0.00240 | -0.4930 | 0.4880 | 0.9920 | 0.992 |

## **6.2 Ulcer Diagnosis from DATE**

### **6.2.1 Crude Model**

### 6.2.1.1 Forest Plot of Model Coefficients

## Warning: Ignoring unknown aesthetics: x





### 6.2.1.2 Table with All Metabolites

| Name                        | exp(coef) | Lower 95 % | Upper 95 % | Pr(> z ) | p.adj    |
|-----------------------------|-----------|------------|------------|----------|----------|
| Ribonic acid                | 1.8       | 1.44       | 2.24       | 1.69e-07 | 1.27e-05 |
| 4-Hydroxybenzeneacetic acid | 1.62      | 1.31       | 2          | 7.56e-06 | 0.000201 |
| Ribitol (2)                 | 1.59      | 1.29       | 1.95       | 9.19e-06 | 0.000201 |
| 2,4-Dihydroxybutanoic acid  | 1.55      | 1.27       | 1.88       | 1.07e-05 | 0.000201 |
| 3,4-Dihydroxybutanoic acid  | 1.48      | 1.23       | 1.8        | 4.85e-05 | 0.000728 |
| Myo inositol                | 1.44      | 1.19       | 1.73       | 0.000132 | 0.00164  |
| Fumaric acid                | 1.39      | 1.15       | 1.69       | 0.000801 | 0.00858  |
| Serine                      | 0.747     | 0.62       | 0.901      | 0.00229  | 0.0215   |
| Benzeneacetic acid          | 1.39      | 1.11       | 1.75       | 0.00444  | 0.037    |
| Creatinine                  | 1.33      | 1.09       | 1.63       | 0.00536  | 0.0402   |
| Nonanoic acid               | 0.808     | 0.693      | 0.942      | 0.00664  | 0.0453   |
| Tyrosine                    | 0.834     | 0.728      | 0.956      | 0.00895  | 0.056    |
| 4-Hydroxyphenyllactic acid  | 1.29      | 1.04       | 1.61       | 0.0225   | 0.121    |
| Alanine                     | 1.26      | 1.03       | 1.53       | 0.0227   | 0.121    |
| 3-Indolepropionic acid      | 0.861     | 0.753      | 0.983      | 0.0269   | 0.132    |
| 4-Deoxytetronic acid (1)    | 1.25      | 1.02       | 1.53       | 0.0284   | 0.132    |
| Malic acid                  | 1.24      | 1.02       | 1.52       | 0.03     | 0.132    |
| Arabinopyranose             | 1.28      | 1.02       | 1.6        | 0.0356   | 0.148    |
| Hydroxyproline              | 1.22      | 1.01       | 1.49       | 0.0431   | 0.156    |
| Valine                      | 0.824     | 0.684      | 0.994      | 0.0432   | 0.156    |
| Threonine                   | 0.864     | 0.75       | 0.996      | 0.0442   | 0.156    |
| Succinic acid               | 1.22      | 1          | 1.47       | 0.0458   | 0.156    |
| Glyceryl-glycoside          | 1.25      | 0.995      | 1.58       | 0.0553   | 0.18     |
| Glycine                     | 1.2       | 0.991      | 1.44       | 0.0626   | 0.196    |
| 1,3-Propanediol             | 0.872     | 0.745      | 1.02       | 0.0845   | 0.253    |
| Citric acid                 | 1.18      | 0.975      | 1.43       | 0.0895   | 0.258    |
| Leucine                     | 0.867     | 0.732      | 1.03       | 0.099    | 0.275    |
| Nonadecanoic acid           | 0.88      | 0.753      | 1.03       | 0.108    | 0.29     |
| Eicosapentaenoic acid       | 1.16      | 0.954      | 1.42       | 0.136    | 0.351    |
| 3-Indoleacetic acid         | 1.16      | 0.952      | 1.41       | 0.142    | 0.352    |
| 2-Hydroxybutyric acid       | 0.871     | 0.722      | 1.05       | 0.146    | 0.352    |
| Pyroglutamic acid           | 1.16      | 0.938      | 1.43       | 0.171    | 0.396    |
| Arachidic acid              | 0.872     | 0.715      | 1.06       | 0.174    | 0.396    |
| Cholesterol                 | 0.885     | 0.733      | 1.07       | 0.204    | 0.449    |
| Linoleic acid               | 0.906     | 0.774      | 1.06       | 0.224    | 0.473    |
| Pyruvic acid                | 1.13      | 0.929      | 1.36       | 0.227    | 0.473    |
| Hydroxylamine               | 0.906     | 0.763      | 1.08       | 0.262    | 0.532    |
| Tartronic acid              | 0.906     | 0.758      | 1.08       | 0.28     | 0.552    |
| Glycerol (1)                | 1.13      | 0.899      | 1.43       | 0.289    | 0.556    |
| 3-Hydroxybutyric acid       | 0.904     | 0.747      | 1.09       | 0.3      | 0.562    |
| alpha-ketoglutaric acid     | 1.11      | 0.902      | 1.36       | 0.328    | 0.599    |
| Methionine                  | 0.915     | 0.763      | 1.1        | 0.337    | 0.601    |
| Decanoic acid               | 0.918     | 0.768      | 1.1        | 0.347    | 0.604    |
| Glycerol (2)                | 1.09      | 0.899      | 1.32       | 0.381    | 0.636    |
| Ethanolamine                | 1.09      | 0.899      | 1.32       | 0.382    | 0.636    |
| Phenylalanine               | 0.929     | 0.773      | 1.12       | 0.428    | 0.698    |
| Lactic acid                 | 1.08      | 0.889      | 1.3        | 0.45     | 0.704    |
| Glyceric acid               | 0.933     | 0.78       | 1.12       | 0.45     | 0.704    |
| Isoleucine                  | 0.934     | 0.777      | 1.12       | 0.469    | 0.718    |
| Glutamic acid               | 1.07      | 0.877      | 1.29       | 0.524    | 0.776    |

| Name                      | exp(coef) | Lower 95 % | Upper 95 % | Pr(> z ) | p.adj |
|---------------------------|-----------|------------|------------|----------|-------|
| alpha-Tocopherol          | 1.06      | 0.876      | 1.29       | 0.528    | 0.776 |
| 4-Deoxytetronic acid (2)  | 1.06      | 0.875      | 1.29       | 0.538    | 0.776 |
| Octanoic acid             | 0.95      | 0.801      | 1.13       | 0.56     | 0.79  |
| 1-Monopalmitin            | 1.06      | 0.868      | 1.29       | 0.576    | 0.79  |
| 2-Palmitoylglycerol       | 1.05      | 0.873      | 1.27       | 0.58     | 0.79  |
| Campesterol               | 1.05      | 0.866      | 1.27       | 0.626    | 0.838 |
| Oleic acid                | 0.96      | 0.795      | 1.16       | 0.67     | 0.882 |
| 1-Dodecanol               | 0.964     | 0.801      | 1.16       | 0.696    | 0.883 |
| 2-hydroxy Isovaleric acid | 0.964     | 0.802      | 1.16       | 0.699    | 0.883 |
| Myristoleic acid          | 1.04      | 0.858      | 1.25       | 0.706    | 0.883 |
| 11-Eicosenoic acid        | 1.03      | 0.854      | 1.25       | 0.734    | 0.903 |
| Stearic acid              | 0.973     | 0.803      | 1.18       | 0.779    | 0.943 |
| Docosaehaenoic acid       | 0.979     | 0.817      | 1.17       | 0.814    | 0.962 |
| 4-Hydroxybutanoic acid    | 1.02      | 0.846      | 1.23       | 0.828    | 0.962 |
| Palmitic acid             | 0.98      | 0.809      | 1.19       | 0.833    | 0.962 |
| Aminomalonic acid         | 0.988     | 0.82       | 1.19       | 0.899    | 0.997 |
| Heptadecanoic acid (1)    | 0.99      | 0.821      | 1.19       | 0.916    | 0.997 |
| L-5-Oxoproline            | 1.01      | 0.836      | 1.21       | 0.935    | 0.997 |
| Ribitol (1)               | 0.994     | 0.815      | 1.21       | 0.951    | 0.997 |
| Dodecanoic acid           | 1.01      | 0.834      | 1.21       | 0.952    | 0.997 |
| Bisphenol A               | 0.995     | 0.825      | 1.2        | 0.958    | 0.997 |
| Heptadecanoic acid (2)    | 1         | 0.834      | 1.21       | 0.968    | 0.997 |
| Proline                   | 0.997     | 0.827      | 1.2        | 0.971    | 0.997 |
| Tridecanoic acid          | 1         | 0.832      | 1.2        | 0.996    | 0.997 |
| Arachidonic acid          | 1         | 0.826      | 1.21       | 0.997    | 0.997 |

### 6.2.1.3 Top Metabolite

```
## Call:
## survival::coxph(formula = survival::Surv(time = Ulcer.diagnosis.tdiff,
##     event = Ulcer.diagnosis.from.DATE) ~ Ribonic_acid, data = data.km)
##
##   n= 618, number of events= 108
##   (19 observations deleted due to missingness)
##
##           coef exp(coef) se(coef)      z Pr(>|z|)
## Ribonic_acid 0.5957    1.8142   0.1139  5.231 1.69e-07 ***
## ---
## Signif. codes:  0 '***' 0.001 '**' 0.01 '*' 0.05 '.' 0.1 ' ' 1
##
##           exp(coef) exp(-coef) lower .95 upper .95
## Ribonic_acid      1.814    0.5512    1.451    2.268
##
## Concordance= 0.647 (se = 0.026 )
## Likelihood ratio test= 28.99  on 1 df,   p=7e-08
## Wald test               = 27.36  on 1 df,   p=2e-07
## Score (logrank) test = 24.86  on 1 df,   p=6e-07
```

### 6.2.1.4 Kaplan-Maier Curve with Median Cutpoint

- Top metabolite



#### Number at risk

|                    |     |     |     |     |   |
|--------------------|-----|-----|-----|-----|---|
| Ribonic_acid= >50% | 306 | 293 | 268 | 241 | 0 |
| Ribonic_acid= <50% | 312 | 307 | 293 | 281 | 1 |

#### Cumulative number of events

|                    |   |    |    |    |    |
|--------------------|---|----|----|----|----|
| Ribonic_acid= >50% | 0 | 13 | 38 | 65 | 75 |
| Ribonic_acid= <50% | 0 | 5  | 19 | 31 | 33 |



Number at risk

|                    |     |     |     |     |   |
|--------------------|-----|-----|-----|-----|---|
| Ribonic_acid= >50% | 306 | 293 | 268 | 241 | 0 |
| Ribonic_acid= <50% | 312 | 307 | 293 | 281 | 1 |

Cumulative number of events

|                    |   |    |    |    |    |
|--------------------|---|----|----|----|----|
| Ribonic_acid= >50% | 0 | 13 | 38 | 65 | 75 |
| Ribonic_acid= <50% | 0 | 5  | 19 | 31 | 33 |

## 6.2.2 Adjusted Model

### 6.2.2.1 Forest Plot of Model Coefficients

## Warning: Ignoring unknown aesthetics: x



### 6.2.2.2 Table with All Metabolites

| Name                        | exp(coef) | Lower 95 % | Upper 95 % | Pr(> z ) | p.adj   |
|-----------------------------|-----------|------------|------------|----------|---------|
| Ribonic acid                | 1.57      | 1.25       | 1.97       | 8.95e-05 | 0.00671 |
| Tyrosine                    | 0.793     | 0.696      | 0.902      | 0.000425 | 0.0159  |
| 2,4-Dihydroxybutanoic acid  | 1.35      | 1.09       | 1.67       | 0.00583  | 0.146   |
| Fumaric acid                | 1.3       | 1.06       | 1.59       | 0.0104   | 0.157   |
| Valine                      | 0.773     | 0.631      | 0.946      | 0.0125   | 0.157   |
| Nonanoic acid               | 0.829     | 0.715      | 0.963      | 0.014    | 0.157   |
| Ribitol (2)                 | 1.31      | 1.05       | 1.62       | 0.0172   | 0.157   |
| 4-Hydroxybenzeneacetic acid | 1.32      | 1.05       | 1.65       | 0.0173   | 0.157   |
| 2-Hydroxybutyric acid       | 0.791     | 0.648      | 0.966      | 0.0214   | 0.157   |
| Myo inositol                | 1.25      | 1.03       | 1.52       | 0.0241   | 0.157   |
| Benzeneacetic acid          | 1.29      | 1.03       | 1.63       | 0.0289   | 0.157   |
| Glycine                     | 1.24      | 1.02       | 1.51       | 0.0295   | 0.157   |
| 4-Deoxytetronic acid (1)    | 1.26      | 1.02       | 1.55       | 0.03     | 0.157   |
| 3,4-Dihydroxybutanoic acid  | 1.25      | 1.02       | 1.54       | 0.0303   | 0.157   |
| Serine                      | 0.8       | 0.652      | 0.98       | 0.0314   | 0.157   |
| Leucine                     | 0.848     | 0.727      | 0.99       | 0.0368   | 0.173   |
| Nonadecanoic acid           | 0.831     | 0.696      | 0.992      | 0.0406   | 0.179   |
| Creatinine                  | 1.23      | 1          | 1.5        | 0.0456   | 0.19    |
| Phenylalanine               | 0.834     | 0.693      | 1          | 0.0539   | 0.213   |
| Succinic acid               | 1.2       | 0.986      | 1.47       | 0.0689   | 0.259   |
| Proline                     | 0.842     | 0.686      | 1.03       | 0.102    | 0.349   |
| Malic acid                  | 1.18      | 0.965      | 1.45       | 0.106    | 0.349   |
| Ribitol (1)                 | 0.851     | 0.699      | 1.04       | 0.107    | 0.349   |
| Hydroxyproline              | 1.18      | 0.958      | 1.45       | 0.12     | 0.374   |
| Arabinopyranose             | 1.19      | 0.948      | 1.51       | 0.131    | 0.394   |
| 3-Hydroxybutyric acid       | 0.863     | 0.705      | 1.05       | 0.15     | 0.433   |
| Isoleucine                  | 0.873     | 0.72       | 1.06       | 0.17     | 0.462   |
| 4-Hydroxyphenyllactic acid  | 1.18      | 0.932      | 1.48       | 0.172    | 0.462   |
| Threonine                   | 0.886     | 0.743      | 1.06       | 0.179    | 0.462   |
| Citric acid                 | 1.15      | 0.935      | 1.41       | 0.187    | 0.469   |
| Alanine                     | 1.15      | 0.931      | 1.41       | 0.197    | 0.477   |
| Glutamic acid               | 0.882     | 0.725      | 1.07       | 0.208    | 0.488   |
| 1,3-Propanediol             | 0.909     | 0.779      | 1.06       | 0.229    | 0.52    |
| Methionine                  | 0.884     | 0.721      | 1.09       | 0.239    | 0.528   |
| Hydroxylamine               | 0.912     | 0.764      | 1.09       | 0.303    | 0.637   |
| Decanoic acid               | 0.912     | 0.764      | 1.09       | 0.306    | 0.637   |
| Glyceryl-glycoside          | 1.12      | 0.885      | 1.42       | 0.34     | 0.685   |
| Pyroglutamic acid           | 1.11      | 0.89       | 1.38       | 0.356    | 0.685   |
| 4-Hydroxybutanoic acid      | 1.09      | 0.901      | 1.33       | 0.361    | 0.685   |
| Eicosapentaenoic acid       | 1.11      | 0.889      | 1.38       | 0.365    | 0.685   |
| Arachidic acid              | 0.91      | 0.738      | 1.12       | 0.375    | 0.687   |
| 4-Deoxytetronic acid (2)    | 0.92      | 0.75       | 1.13       | 0.426    | 0.758   |
| 3-Indolepropionic acid      | 0.936     | 0.792      | 1.11       | 0.435    | 0.758   |
| L-5-Oxoproline              | 1.08      | 0.877      | 1.34       | 0.458    | 0.781   |
| Tridecanoic acid            | 1.07      | 0.894      | 1.27       | 0.474    | 0.789   |
| 1-Dodecanol                 | 1.07      | 0.882      | 1.3        | 0.491    | 0.8     |
| Glycerol (2)                | 1.07      | 0.875      | 1.31       | 0.509    | 0.812   |
| Tartronic acid              | 0.937     | 0.768      | 1.14       | 0.521    | 0.814   |
| 1-Monopalmitin              | 1.07      | 0.858      | 1.34       | 0.534    | 0.814   |
| Ethanolamine                | 1.06      | 0.87       | 1.29       | 0.56     | 0.814   |



| Name                      | exp(coef) | Lower 95 % | Upper 95 % | Pr(> z ) | p.adj |
|---------------------------|-----------|------------|------------|----------|-------|
| Aminomalonic acid         | 1.06      | 0.869      | 1.29       | 0.564    | 0.814 |
| Glycerol (1)              | 1.07      | 0.849      | 1.35       | 0.564    | 0.814 |
| Octanoic acid             | 0.946     | 0.773      | 1.16       | 0.593    | 0.839 |
| Bisphenol A               | 1.05      | 0.866      | 1.27       | 0.616    | 0.84  |
| alpha-Tocopherol          | 1.06      | 0.851      | 1.31       | 0.616    | 0.84  |
| Cholesterol               | 1.05      | 0.841      | 1.32       | 0.654    | 0.875 |
| 2-Palmitoylglycerol       | 1.04      | 0.855      | 1.27       | 0.672    | 0.875 |
| Oleic acid                | 0.96      | 0.788      | 1.17       | 0.683    | 0.875 |
| Linoleic acid             | 0.966     | 0.808      | 1.15       | 0.703    | 0.875 |
| Campesterol               | 1.04      | 0.841      | 1.29       | 0.709    | 0.875 |
| 11-Eicosenoic acid        | 1.04      | 0.851      | 1.27       | 0.711    | 0.875 |
| Palmitic acid             | 0.967     | 0.796      | 1.17       | 0.733    | 0.883 |
| Heptadecanoic acid (1)    | 0.969     | 0.802      | 1.17       | 0.741    | 0.883 |
| Docosahexaenoic acid      | 0.97      | 0.799      | 1.18       | 0.759    | 0.889 |
| 3-Indoleacetic acid       | 0.97      | 0.784      | 1.2        | 0.776    | 0.893 |
| alpha-ketoglutaric acid   | 1.03      | 0.852      | 1.24       | 0.786    | 0.893 |
| Myristoleic acid          | 0.976     | 0.795      | 1.2        | 0.813    | 0.903 |
| Dodecanoic acid           | 0.977     | 0.8        | 1.19       | 0.819    | 0.903 |
| Arachidonic acid          | 0.981     | 0.814      | 1.18       | 0.841    | 0.915 |
| Heptadecanoic acid (2)    | 1.02      | 0.839      | 1.23       | 0.867    | 0.929 |
| 2-hydroxy Isovaleric acid | 1.01      | 0.835      | 1.23       | 0.881    | 0.931 |
| Glyceric acid             | 1.01      | 0.844      | 1.21       | 0.909    | 0.947 |
| Lactic acid               | 1.01      | 0.824      | 1.24       | 0.928    | 0.953 |
| Stearic acid              | 1         | 0.821      | 1.22       | 0.982    | 0.995 |
| Pyruvic acid              | 0.999     | 0.825      | 1.21       | 0.995    | 0.995 |

### 6.2.2.3 Top Metabolite

```
## Call:
## survival::coxph(formula = survival::Surv(time = Ulcer.diagnosis.tdiff,
##     event = Ulcer.diagnosis.from.DATE) ~ Ribonic_acid + Age.x +
##     Gender.x + Hba1c_baseline + CALSBP + bmi + Smoking + Statin +
##     log_Blood_TGA + Total_cholesterol, data = data.km)
##
## n= 605, number of events= 107
## (32 observations deleted due to missingness)
##
##              coef exp(coef) se(coef)      z Pr(>|z|)
## Ribonic_acid  0.4601710  1.5843449  0.1174692  3.917 8.95e-05 ***
## Age.x         0.0434494  1.0444071  0.0091261  4.761 1.93e-06 ***
## Gender.x     0.3421315  1.4079455  0.2055785  1.664 0.096065 .
## Hba1c_baseline 0.3097510  1.3630857  0.0865588  3.579 0.000346 ***
## CALSBP      -0.0009112  0.9990892  0.0055210 -0.165 0.868913
## bmi         0.0167344  1.0168752  0.0243790  0.686 0.492446
## Smoking     0.3277397  1.3878276  0.2411257  1.359 0.174081
## Statin      0.7673117  2.1539680  0.2623612  2.925 0.003449 **
## log_Blood_TGA 0.0691174  1.0715620  0.1705221  0.405 0.685236
## Total_cholesterol -0.0901358  0.9138071  0.1237872 -0.728 0.466521
## ---
## Signif. codes:  0 '***' 0.001 '**' 0.01 '*' 0.05 '.' 0.1 ' ' 1
##
##              exp(coef) exp(-coef) lower .95 upper .95
## Ribonic_acid  1.5843  0.6312  1.2585  1.995
## Age.x         1.0444  0.9575  1.0259  1.063
## Gender.x     1.4079  0.7103  0.9410  2.107
## Hba1c_baseline 1.3631  0.7336  1.1504  1.615
## CALSBP      0.9991  1.0009  0.9883  1.010
## bmi         1.0169  0.9834  0.9694  1.067
## Smoking     1.3878  0.7206  0.8651  2.226
## Statin      2.1540  0.4643  1.2880  3.602
## log_Blood_TGA 1.0716  0.9332  0.7671  1.497
## Total_cholesterol 0.9138  1.0943  0.7169  1.165
##
## Concordance= 0.753 (se = 0.019 )
## Likelihood ratio test= 90.56 on 10 df, p=4e-15
## Wald test = 79.09 on 10 df, p=8e-13
## Score (logrank) test = 81.22 on 10 df, p=3e-13
```

### 6.2.2.3.1 Forest Plot with Clinical Variables

- Top metabolite



### 6.2.3 Adjusted Model with eGFR

### 6.2.3.1 Forest Plot of Model Coefficients

```
## NULL
```

### 6.2.3.2 Table with All Metabolites

| Name                        | exp(coef) | Lower 95 % | Upper 95 % | Pr(> z ) | p.adj |
|-----------------------------|-----------|------------|------------|----------|-------|
| Nonanoic acid               | 0.797     | 0.687      | 0.926      | 0.00293  | 0.115 |
| Tyrosine                    | 0.816     | 0.713      | 0.934      | 0.00308  | 0.115 |
| Ribonic acid                | 1.38      | 1.07       | 1.79       | 0.0121   | 0.302 |
| 4-Deoxytetronic acid (2)    | 0.779     | 0.635      | 0.955      | 0.0164   | 0.308 |
| Phenylalanine               | 0.817     | 0.679      | 0.982      | 0.0316   | 0.395 |
| Fumaric acid                | 1.24      | 1.02       | 1.52       | 0.0346   | 0.395 |
| Nonadecanoic acid           | 0.831     | 0.698      | 0.989      | 0.0369   | 0.395 |
| Ribitol (1)                 | 0.834     | 0.684      | 1.02       | 0.0709   | 0.596 |
| Proline                     | 0.834     | 0.683      | 1.02       | 0.074    | 0.596 |
| Serine                      | 0.833     | 0.679      | 1.02       | 0.0794   | 0.596 |
| Valine                      | 0.842     | 0.686      | 1.03       | 0.101    | 0.617 |
| Benzeneacetic acid          | 1.21      | 0.961      | 1.51       | 0.105    | 0.617 |
| Glycine                     | 1.17      | 0.961      | 1.43       | 0.116    | 0.617 |
| 3-Hydroxybutyric acid       | 0.853     | 0.699      | 1.04       | 0.12     | 0.617 |
| 1,3-Propanediol             | 0.881     | 0.749      | 1.04       | 0.124    | 0.617 |
| Arabinopyranose             | 1.2       | 0.947      | 1.52       | 0.132    | 0.617 |
| Succinic acid               | 1.17      | 0.951      | 1.43       | 0.14     | 0.618 |
| Eicosapentaenoic acid       | 1.18      | 0.941      | 1.48       | 0.152    | 0.634 |
| Leucine                     | 0.901     | 0.774      | 1.05       | 0.176    | 0.697 |
| 2-Hydroxybutyric acid       | 0.872     | 0.709      | 1.07       | 0.193    | 0.725 |
| Threonine                   | 0.892     | 0.746      | 1.07       | 0.211    | 0.754 |
| 3-Indoleacetic acid         | 0.877     | 0.702      | 1.1        | 0.249    | 0.804 |
| 4-Deoxytetronic acid (1)    | 1.13      | 0.915      | 1.41       | 0.252    | 0.804 |
| 2,4-Dihydroxybutanoic acid  | 1.15      | 0.901      | 1.46       | 0.269    | 0.804 |
| 4-Hydroxybenzeneacetic acid | 1.14      | 0.898      | 1.45       | 0.281    | 0.804 |
| Glutamic acid               | 0.899     | 0.74       | 1.09       | 0.282    | 0.804 |
| 4-Hydroxybutanoic acid      | 1.11      | 0.914      | 1.35       | 0.292    | 0.804 |
| Decanoic acid               | 0.91      | 0.763      | 1.09       | 0.3      | 0.804 |
| Malic acid                  | 1.11      | 0.905      | 1.36       | 0.318    | 0.821 |
| Glycerol (1)                | 1.12      | 0.891      | 1.4        | 0.334    | 0.821 |
| Arachidic acid              | 0.908     | 0.741      | 1.11       | 0.351    | 0.821 |
| Hydroxylamine               | 0.923     | 0.78       | 1.09       | 0.352    | 0.821 |
| Hydroxyproline              | 1.1       | 0.892      | 1.37       | 0.361    | 0.821 |
| Cholesterol                 | 1.11      | 0.883      | 1.39       | 0.376    | 0.83  |
| L-5-Oxoproline              | 1.09      | 0.884      | 1.34       | 0.418    | 0.873 |
| 1-Dodecanol                 | 1.08      | 0.892      | 1.32       | 0.419    | 0.873 |
| 2-Palmitoylglycerol         | 1.08      | 0.885      | 1.32       | 0.446    | 0.9   |
| Alanine                     | 1.08      | 0.879      | 1.33       | 0.456    | 0.9   |
| 2-hydroxy Isovaleric acid   | 1.08      | 0.876      | 1.32       | 0.483    | 0.911 |
| 4-Hydroxyphenyllactic acid  | 1.08      | 0.858      | 1.37       | 0.502    | 0.911 |
| Glyceric acid               | 1.07      | 0.879      | 1.29       | 0.513    | 0.911 |
| alpha-Tocopherol            | 1.07      | 0.867      | 1.32       | 0.529    | 0.911 |
| Ribitol (2)                 | 1.08      | 0.847      | 1.38       | 0.531    | 0.911 |
| 1-Monopalmitin              | 1.07      | 0.86       | 1.34       | 0.536    | 0.911 |
| 3,4-Dihydroxybutanoic acid  | 1.07      | 0.854      | 1.35       | 0.548    | 0.911 |
| Tridecanoic acid            | 1.05      | 0.884      | 1.25       | 0.572    | 0.911 |
| Ethanolamine                | 1.06      | 0.864      | 1.3        | 0.576    | 0.911 |
| Methionine                  | 0.945     | 0.767      | 1.16       | 0.592    | 0.911 |
| Bisphenol A                 | 1.05      | 0.868      | 1.28       | 0.595    | 0.911 |
| Tartronic acid              | 0.951     | 0.783      | 1.16       | 0.612    | 0.918 |

| Name                    | exp(coef) | Lower 95 % | Upper 95 % | Pr(> z ) | p.adj |
|-------------------------|-----------|------------|------------|----------|-------|
| Creatinine              | 1.05      | 0.857      | 1.29       | 0.63     | 0.92  |
| Heptadecanoic acid (1)  | 0.962     | 0.801      | 1.16       | 0.681    | 0.92  |
| Isoleucine              | 0.961     | 0.788      | 1.17       | 0.692    | 0.92  |
| Citric acid             | 1.04      | 0.843      | 1.29       | 0.701    | 0.92  |
| 3-Indolepropionic acid  | 0.967     | 0.816      | 1.15       | 0.702    | 0.92  |
| Aminomalonic acid       | 1.04      | 0.848      | 1.27       | 0.708    | 0.92  |
| Oleic acid              | 0.964     | 0.796      | 1.17       | 0.711    | 0.92  |
| Linoleic acid           | 0.968     | 0.813      | 1.15       | 0.712    | 0.92  |
| Dodecanoic acid         | 0.966     | 0.792      | 1.18       | 0.729    | 0.92  |
| Stearic acid            | 1.03      | 0.849      | 1.26       | 0.736    | 0.92  |
| Myo inositol            | 1.03      | 0.818      | 1.3        | 0.791    | 0.943 |
| 11-Eicosenoic acid      | 1.03      | 0.843      | 1.25       | 0.792    | 0.943 |
| Glyceryl-glycoside      | 1.03      | 0.816      | 1.29       | 0.827    | 0.943 |
| Heptadecanoic acid (2)  | 1.02      | 0.843      | 1.24       | 0.832    | 0.943 |
| Octanoic acid           | 0.981     | 0.805      | 1.19       | 0.845    | 0.943 |
| Lactic acid             | 1.02      | 0.838      | 1.24       | 0.846    | 0.943 |
| Glycerol (2)            | 1.02      | 0.835      | 1.24       | 0.851    | 0.943 |
| Myristoleic acid        | 0.984     | 0.81       | 1.2        | 0.873    | 0.943 |
| Campesterol             | 1.02      | 0.823      | 1.25       | 0.88     | 0.943 |
| alpha-ketoglutaric acid | 1.01      | 0.838      | 1.23       | 0.893    | 0.943 |
| Arachidonic acid        | 0.988     | 0.813      | 1.2        | 0.903    | 0.943 |
| Pyroglutamic acid       | 0.987     | 0.792      | 1.23       | 0.906    | 0.943 |
| Palmitic acid           | 0.996     | 0.814      | 1.22       | 0.973    | 0.995 |
| Docosahexaenoic acid    | 1         | 0.821      | 1.22       | 0.982    | 0.995 |
| Pyruvic acid            | 1         | 0.827      | 1.21       | 0.995    | 0.995 |

### 6.2.3.3 Top Metabolite from Adjusted Model

```
## Call:
## survival::coxph(formula = survival::Surv(time = Ulcer.diagnosis.tdiff,
##   event = Ulcer.diagnosis.from.DATE) ~ Ribonic_acid + Age.x +
##   Gender.x + Hba1c_baseline + CALSBP + bmi + Smoking + Statin +
##   log_Blood_TGA + Total_cholesterol + egfr, data = data.km)
##
##   n= 603, number of events= 107
##   (34 observations deleted due to missingness)
##
##              coef exp(coef)  se(coef)      z Pr(>|z|)
## Ribonic_acid    0.331041  1.392417  0.131879  2.510 0.012067 *
## Age.x           0.040851  1.041696  0.009169  4.455 8.38e-06 ***
## Gender.x        0.407541  1.503116  0.207463  1.964 0.049484 *
## Hba1c_baseline  0.299112  1.348661  0.087588  3.415 0.000638 ***
## CALSBP          -0.001878  0.998124  0.005517 -0.340 0.733554
## bmi             0.016694  1.016835  0.024309  0.687 0.492229
## Smoking         0.342762  1.408834  0.241142  1.421 0.155196
## Statin          0.710802  2.035622  0.264929  2.683 0.007297 **
## log_Blood_TGA  0.042170  1.043072  0.170503  0.247 0.804654
## Total_cholesterol -0.076283  0.926554  0.122820 -0.621 0.534535
## egfr            -0.008234  0.991800  0.004232 -1.946 0.051697 .
## ---
## Signif. codes:  0 '***' 0.001 '**' 0.01 '*' 0.05 '.' 0.1 ' ' 1
##
##              exp(coef) exp(-coef) lower .95 upper .95
## Ribonic_acid      1.3924    0.7182    1.0753    1.803
## Age.x              1.0417    0.9600    1.0231    1.061
## Gender.x           1.5031    0.6653    1.0009    2.257
## Hba1c_baseline     1.3487    0.7415    1.1359    1.601
## CALSBP             0.9981    1.0019    0.9874    1.009
## bmi                1.0168    0.9834    0.9695    1.066
## Smoking            1.4088    0.7098    0.8782    2.260
## Statin             2.0356    0.4913    1.2111    3.421
## log_Blood_TGA     1.0431    0.9587    0.7468    1.457
## Total_cholesterol  0.9266    1.0793    0.7283    1.179
## egfr              0.9918    1.0083    0.9836    1.000
##
## Concordance= 0.761 (se = 0.019 )
## Likelihood ratio test= 94.16 on 11 df, p=3e-15
## Wald test              = 82.66 on 11 df, p=5e-13
## Score (logrank) test = 88.44 on 11 df, p=3e-14
```



### 6.2.3.3.1 Forest Plot with Clinical Variables

- Top metabolite from adjusted model



## 6.2.4 Fully Adjusted Model

#### 6.2.4.1 Forest Plot of Model Coefficients

## NULL

### 6.2.4.2 Table with All Metabolites

| Name                        | exp(coef) | Lower 95 % | Upper 95 % | Pr(> z ) | p.adj |
|-----------------------------|-----------|------------|------------|----------|-------|
| Tyrosine                    | 0.81      | 0.707      | 0.928      | 0.00233  | 0.12  |
| Nonanoic acid               | 0.798     | 0.687      | 0.927      | 0.00321  | 0.12  |
| Ribonic acid                | 1.37      | 1.06       | 1.77       | 0.0154   | 0.385 |
| Nonadecanoic acid           | 0.816     | 0.685      | 0.971      | 0.022    | 0.394 |
| 4-Deoxytetronic acid (2)    | 0.791     | 0.643      | 0.973      | 0.0263   | 0.394 |
| Phenylalanine               | 0.814     | 0.675      | 0.982      | 0.0315   | 0.394 |
| Ribitol (1)                 | 0.813     | 0.666      | 0.991      | 0.0405   | 0.434 |
| Fumaric acid                | 1.21      | 0.989      | 1.48       | 0.0641   | 0.543 |
| Valine                      | 0.821     | 0.666      | 1.01       | 0.0651   | 0.543 |
| Proline                     | 0.834     | 0.682      | 1.02       | 0.0755   | 0.547 |
| Serine                      | 0.832     | 0.677      | 1.02       | 0.0802   | 0.547 |
| 3-Hydroxybutyric acid       | 0.84      | 0.687      | 1.03       | 0.0892   | 0.549 |
| Succinic acid               | 1.19      | 0.97       | 1.46       | 0.0952   | 0.549 |
| 1,3-Propanediol             | 0.882     | 0.75       | 1.04       | 0.131    | 0.69  |
| Benzeneacetic acid          | 1.19      | 0.946      | 1.5        | 0.138    | 0.69  |
| Arabinopyranose             | 1.18      | 0.932      | 1.5        | 0.168    | 0.721 |
| Leucine                     | 0.901     | 0.775      | 1.05       | 0.176    | 0.721 |
| Glycine                     | 1.15      | 0.938      | 1.4        | 0.181    | 0.721 |
| 3-Indoleacetic acid         | 0.859     | 0.685      | 1.08       | 0.189    | 0.721 |
| Malic acid                  | 1.15      | 0.932      | 1.42       | 0.192    | 0.721 |
| Decanoic acid               | 0.897     | 0.752      | 1.07       | 0.227    | 0.811 |
| Threonine                   | 0.9       | 0.751      | 1.08       | 0.253    | 0.812 |
| Arachidic acid              | 0.891     | 0.724      | 1.1        | 0.276    | 0.812 |
| Glycerol (1)                | 1.13      | 0.899      | 1.43       | 0.291    | 0.812 |
| 2-Hydroxybutyric acid       | 0.893     | 0.723      | 1.1        | 0.294    | 0.812 |
| 4-Hydroxybutanoic acid      | 1.11      | 0.91       | 1.35       | 0.303    | 0.812 |
| Eicosapentaenoic acid       | 1.13      | 0.896      | 1.42       | 0.306    | 0.812 |
| Glutamic acid               | 0.903     | 0.74       | 1.1        | 0.311    | 0.812 |
| 4-Deoxytetronic acid (1)    | 1.12      | 0.897      | 1.39       | 0.324    | 0.812 |
| Hydroxyproline              | 1.11      | 0.898      | 1.38       | 0.325    | 0.812 |
| Hydroxylamine               | 0.923     | 0.777      | 1.1        | 0.361    | 0.845 |
| Cholesterol                 | 1.11      | 0.881      | 1.39       | 0.381    | 0.845 |
| Alanine                     | 1.09      | 0.888      | 1.35       | 0.398    | 0.845 |
| 4-Hydroxybenzeneacetic acid | 1.11      | 0.874      | 1.4        | 0.401    | 0.845 |
| L-5-Oxoproline              | 1.09      | 0.886      | 1.35       | 0.404    | 0.845 |
| 2,4-Dihydroxybutanoic acid  | 1.11      | 0.868      | 1.42       | 0.406    | 0.845 |
| 4-Hydroxyphenyllactic acid  | 1.09      | 0.854      | 1.38       | 0.501    | 0.891 |
| 2-Palmitoylglycerol         | 1.07      | 0.876      | 1.31       | 0.508    | 0.891 |
| 1-Dodecanol                 | 1.07      | 0.877      | 1.3        | 0.516    | 0.891 |
| Ethanolamine                | 1.07      | 0.868      | 1.31       | 0.535    | 0.891 |
| 2-hydroxy Isovaleric acid   | 1.07      | 0.866      | 1.32       | 0.538    | 0.891 |
| Tartronic acid              | 0.941     | 0.774      | 1.14       | 0.542    | 0.891 |
| Tridecanoic acid            | 1.05      | 0.884      | 1.25       | 0.564    | 0.891 |
| 1-Monopalmitin              | 1.07      | 0.857      | 1.33       | 0.568    | 0.891 |
| Heptadecanoic acid (1)      | 0.948     | 0.787      | 1.14       | 0.573    | 0.891 |
| Methionine                  | 0.947     | 0.767      | 1.17       | 0.609    | 0.891 |
| 3-Indolepropionic acid      | 0.957     | 0.809      | 1.13       | 0.61     | 0.891 |
| Isoleucine                  | 0.95      | 0.781      | 1.16       | 0.611    | 0.891 |
| 3,4-Dihydroxybutanoic acid  | 1.06      | 0.841      | 1.34       | 0.614    | 0.891 |
| Dodecanoic acid             | 0.951     | 0.78       | 1.16       | 0.619    | 0.891 |

| Name                    | exp(coef) | Lower 95 % | Upper 95 % | Pr(> z ) | p.adj |
|-------------------------|-----------|------------|------------|----------|-------|
| Creatinine              | 1.05      | 0.857      | 1.29       | 0.62     | 0.891 |
| Glyceric acid           | 1.05      | 0.864      | 1.28       | 0.62     | 0.891 |
| alpha-Tocopherol        | 1.05      | 0.852      | 1.3        | 0.629    | 0.891 |
| Lactic acid             | 1.04      | 0.856      | 1.27       | 0.681    | 0.946 |
| Oleic acid              | 0.965     | 0.795      | 1.17       | 0.714    | 0.951 |
| Ribitol (2)             | 1.05      | 0.82       | 1.33       | 0.719    | 0.951 |
| Bisphenol A             | 1.04      | 0.851      | 1.26       | 0.727    | 0.951 |
| Linoleic acid           | 0.972     | 0.815      | 1.16       | 0.747    | 0.951 |
| alpha-ketoglutaric acid | 1.03      | 0.847      | 1.25       | 0.768    | 0.951 |
| Stearic acid            | 1.03      | 0.843      | 1.25       | 0.783    | 0.951 |
| Octanoic acid           | 0.973     | 0.801      | 1.18       | 0.785    | 0.951 |
| Aminomalonic acid       | 1.03      | 0.837      | 1.27       | 0.786    | 0.951 |
| Myristoleic acid        | 0.976     | 0.804      | 1.18       | 0.805    | 0.958 |
| Glyceryl-glycoside      | 0.978     | 0.778      | 1.23       | 0.845    | 0.96  |
| Citric acid             | 1.02      | 0.824      | 1.27       | 0.851    | 0.96  |
| Pyroglutamic acid       | 0.98      | 0.786      | 1.22       | 0.858    | 0.96  |
| Glycerol (2)            | 1.02      | 0.831      | 1.24       | 0.88     | 0.96  |
| Palmitic acid           | 0.986     | 0.804      | 1.21       | 0.896    | 0.96  |
| Heptadecanoic acid (2)  | 0.989     | 0.816      | 1.2        | 0.913    | 0.96  |
| Docosahexaenoic acid    | 0.99      | 0.813      | 1.21       | 0.923    | 0.96  |
| Myo inositol            | 1.01      | 0.8        | 1.28       | 0.932    | 0.96  |
| 11-Eicosenoic acid      | 0.991     | 0.801      | 1.23       | 0.935    | 0.96  |
| Campesterol             | 1.01      | 0.813      | 1.25       | 0.944    | 0.96  |
| Pyruvic acid            | 1.01      | 0.829      | 1.22       | 0.959    | 0.96  |
| Arachidonic acid        | 0.995     | 0.816      | 1.21       | 0.96     | 0.96  |

### 6.2.4.3 Top Metabolites

#### 6.2.4.3.1 Top Metabolite – Tyrosine

```
## Call:
## survival::coxph(formula = survival::Surv(time = Ulcer.diagnosis.tdiff,
##     event = Ulcer.diagnosis.from.DATE) ~ Tyrosine + Age.x + Gender.x +
##     Hba1c_baseline + CALSBP + bmi + Smoking + Statin + log_Blood_TGA +
##     Total_cholesterol + egfr + logUAER, data = data.km)
##
## n= 570, number of events= 105
## (67 observations deleted due to missingness)
##
##              coef exp(coef) se(coef)      z Pr(>|z|)
## Tyrosine      -0.211095  0.809697  0.069329 -3.045  0.00233 **
## Age.x          0.532079  1.702469  0.125699  4.233  2.31e-05 ***
## Gender.x       0.391308  1.478913  0.215163  1.819  0.06896 .
## Hba1c_baseline 0.392627  1.480866  0.100879  3.892  9.94e-05 ***
## CALSBP        -0.042728  0.958172  0.105902 -0.403  0.68660
## bmi           0.003430  1.003436  0.101722  0.034  0.97310
## Smoking        0.250030  1.284064  0.246942  1.013  0.31130
## Statin         0.620318  1.859519  0.267533  2.319  0.02041 *
## log_Blood_TGA  0.061086  1.062991  0.119191  0.513  0.60830
## Total_cholesterol -0.137230  0.871770  0.109713 -1.251  0.21101
## egfr          -0.362850  0.695691  0.119620 -3.033  0.00242 **
## logUAER       -0.007858  0.992173  0.110637 -0.071  0.94338
## ---
## Signif. codes:  0 '***' 0.001 '**' 0.01 '*' 0.05 '.' 0.1 ' ' 1
##
##              exp(coef) exp(-coef) lower .95 upper .95
## Tyrosine          0.8097      1.2350    0.7068    0.9275
## Age.x             1.7025      0.5874    1.3307    2.1781
## Gender.x          1.4789      0.6762    0.9701    2.2547
## Hba1c_baseline    1.4809      0.6753    1.2152    1.8046
## CALSBP            0.9582      1.0437    0.7786    1.1792
## bmi               1.0034      0.9966    0.8221    1.2248
## Smoking           1.2841      0.7788    0.7914    2.0835
## Statin            1.8595      0.5378    1.1007    3.1414
## log_Blood_TGA     1.0630      0.9407    0.8415    1.3427
## Total_cholesterol 0.8718      1.1471    0.7031    1.0809
## egfr              0.6957      1.4374    0.5503    0.8795
## logUAER           0.9922      1.0079    0.7988    1.2324
##
## Concordance= 0.753 (se = 0.019 )
## Likelihood ratio test= 87.75 on 12 df, p=1e-13
## Wald test              = 79.74 on 12 df, p=5e-12
## Score (logrank) test = 85.52 on 12 df, p=4e-13
```

Forest Plot with Clinical Variables

- Tyrosine



Kaplan-Maier Curve with Median Cutpoint

- Tyrosine



Number at risk

|                      |     |     |     |     |   |
|----------------------|-----|-----|-----|-----|---|
| Tyrosine_group= >50% | 254 | 249 | 235 | 222 | 1 |
| Tyrosine_group= <50% | 364 | 351 | 326 | 300 | 0 |

Cumulative number of events

|                      |   |    |    |    |    |
|----------------------|---|----|----|----|----|
| Tyrosine_group= >50% | 0 | 5  | 19 | 32 | 37 |
| Tyrosine_group= <50% | 0 | 13 | 38 | 64 | 71 |





Number at risk

|                      |     |     |     |     |   |
|----------------------|-----|-----|-----|-----|---|
| Tyrosine_group= >50% | 254 | 249 | 235 | 222 | 1 |
| Tyrosine_group= <50% | 364 | 351 | 326 | 300 | 0 |

Cumulative number of events

|                      |   |    |    |    |    |
|----------------------|---|----|----|----|----|
| Tyrosine_group= >50% | 0 | 5  | 19 | 32 | 37 |
| Tyrosine_group= <50% | 0 | 13 | 38 | 64 | 71 |

```
##
## 1
## 517

##
## (-9.21,-0.29] (-0.29,0.155] (0.155,0.541] (0.541,1.57]
## 159 210 108 159

##
## 4th Quartile 3rd Quartile 2nd Quartile 1st Quartile
## 159 108 210 159

## Loading required package: ggplot2
```



### 6.2.4.3.2 Top Metabolite from Adjusted Model – Ribonic Acid

```
## Call:
## survival::coxph(formula = survival::Surv(time = Ulcer.diagnosis.tdiff,
##     event = Ulcer.diagnosis.from.DATE) ~ Ribonic_acid + Age.x +
##     Gender.x + Hba1c_baseline + CALSBP + bmi + Smoking + Statin +
##     log_Blood_TGA + Total_cholesterol + egfr + logUAER, data = data.km)
##
## n= 570, number of events= 105
## (67 observations deleted due to missingness)
##
##           coef exp(coef) se(coef)      z Pr(>|z|)
## Ribonic_acid  0.31444  1.36949  0.12977  2.423 0.015392 *
## Age.x         0.46314  1.58905  0.12302  3.765 0.000167 ***
## Gender.x      0.45362  1.57400  0.21598  2.100 0.035701 *
## Hba1c_baseline 0.37866  1.46033  0.10263  3.690 0.000224 ***
## CALSBP       -0.03533  0.96529  0.10325 -0.342 0.732234
## bmi          0.04687  1.04799  0.10025  0.468 0.640089
## Smoking      0.32928  1.38997  0.24962  1.319 0.187116
## Statin       0.65246  1.92026  0.26774  2.437 0.014811 *
## log_Blood_TGA 0.01055  1.01061  0.12009  0.088 0.929969
## Total_cholesterol -0.05763  0.94400  0.10868 -0.530 0.595947
## egfr        -0.24726  0.78094  0.13022 -1.899 0.057587 .
## logUAER     -0.01014  0.98992  0.11117 -0.091 0.927351
## ---
## Signif. codes:  0 '***' 0.001 '**' 0.01 '*' 0.05 '.' 0.1 ' ' 1
##
##           exp(coef) exp(-coef) lower .95 upper .95
## Ribonic_acid      1.3695    0.7302    1.0619    1.766
## Age.x             1.5891    0.6293    1.2486    2.022
## Gender.x          1.5740    0.6353    1.0308    2.403
## Hba1c_baseline    1.4603    0.6848    1.1943    1.786
## CALSBP            0.9653    1.0360    0.7884    1.182
## bmi               1.0480    0.9542    0.8610    1.276
## Smoking           1.3900    0.7194    0.8522    2.267
## Statin            1.9203    0.5208    1.1362    3.245
## log_Blood_TGA     1.0106    0.9895    0.7987    1.279
## Total_cholesterol 0.9440    1.0593    0.7629    1.168
## egfr              0.7809    1.2805    0.6050    1.008
## logUAER           0.9899    1.0102    0.7961    1.231
##
## Concordance= 0.755 (se = 0.02 )
## Likelihood ratio test= 86.86 on 12 df, p=2e-13
## Wald test              = 78.01 on 12 df, p=1e-11
## Score (logrank) test = 82.79 on 12 df, p=1e-12
```

Forest Plot with Clinical Variables

- Top metabolite from adjusted model



### 6.2.5 Compilation



# 7 Integration of Results

## 7.1 Crude Models

### 7.1.1 Cross-Sectional



### 7.1.2 Longitudinal



## 7.2 Adjusted Models

### 7.2.1 Cross-Sectional





## 7.2.2 Longitudinal
